# Supplementary material for: Targeting p300/CBP Attenuates Hepatocellular Carcinoma Progression through Epigenetic Regulation of Metabolism
Source: Oxford University Press journal article supplement (doi:10.1158/0008-5472.can-20-1323), 2020-12-23
Supplement: 00085472can201323-sup-241667_3_supp_6772392_ql0jt1.docx [file 00085472can201323-sup-241667_3_supp_6772392_ql0jt1.docx]

**Table S1**: Primer and siRNA sequences

| Primer sequences for qRT-PCR | | | |
| --- | --- | --- | --- |
| **Gene Name** | | **Forward Sequence** | **Reverse Sequence** |
| CCND1 | | GACCTTCGTTGCCCTCTGT | TGAGGCGGTAGTAGGACAGG |
| β-actin | | CATCCTGCGTCTGGACCT | GTACTTGCGCTCAGGAGGAG |
| RPL4 | | GCCAGGGTGCTTTTGGAAAC | GGGCAGAACAGATGGCGTAT |
| RPL5 | | TATGGTGTGAAGGTTGGCCT | TCACCAGTCACCTCCACTTG |
| RPL6 | | CATTACCCCCGGGACCAT | CTTCAGGAAAACCACCCTCTTG |
| RPL7 | | AGTGAGCCCAAAGGTTCGAA | AGCTTCACAAAGGTTCCATTGAA |
| RPL15 | | GAGAAGCCGGAAGTGGTGAA | GTTGAAGGTCTTGCCGTTGTAGA |
| RPL23 | | GATCAAGGGACGGCTGAACA | GTCGAATGACCACTGCTGGA |
| RPL27 | | ACCTGGGAAGGTGGTGCTT | TTCTTCACGATGACAGCTTTGC |
| RPL29 | | ACACACAACCAGTCCCGAAA | CTTCTTGGCAAAGCGCATGT |
| RPL32 | | GAGTCGTGCAGAGGAAAGAAGTA | TTGGGCAACAATGGGCATCTT |
| RPL38 | | TGCCTCGGAAAATTGAGGAA | TCTTGACAGATTTGGCATCCTTT |
| PSAT1 | | CGGTCCTGGAATACAAGGTG | AACCAAGCCCATGACGTAGA |
| PSPH | | CACGGTCATCAGAGAAGAAG | GGTTGCTCTGCTATGAGTCT |
| ATIC | | CACGCTCGAGTGACAGTG | TCGGAGCTCTGCATCTCCG |
| TALDO1 | | AAGTAGACGCAAGGCTCTCC | ATGGGGAGATGAGGGTCACA |
| DTYMK | | CCTCGTCGTGGACAGATACG | CATCCGCCAGCTGTAACTCC |
| ALDH18A1 | | GTGCTGCCCAGATTTTGGTG | CATTTACCCCCTGCAGGTCA |
| PSPH-chip | | GTGAGCTATTGCGTCCGG | GGCAGTGGCAGTGGGTTT |
| PSAT1-chip | | GCTACAAATCTGCTCGGCAAC | CAATCTGGCCGGTTCCAGTC |
| ALDH18A1-chip | | CGCTGGCTTGATTCTCGAAAG | TGGCGTAAGAGTAAACCTGGG |
| ATIC-chip | | ACTGTCATCATTCCTCTCATCCAG | TTTAAGTGAGGGACTCCAGAGG |
| DTYMK-chip | | GCATCTCGCTCGTTCGTCTC | GCGTCGGCTCTCGTTGG |
| TALDO1-chip | | TAAAGGACTTGCCTGGCGG | GGTGGGTGGATACGGTTCTTT |
| RPL6-chip | | GGCATTCTACCTCACCCTCTTTG | GCCTTCCAGACGCTTCATTT |
| NC | | ACCAACACTCTTCCCTCAGC | TTATTTTGGTTCAGGTGGTTGA |
| siRNA sequences | | | |
| **siRNA** | **Sequence(**5′-3′**)** | | |
| siP300-1 | GGAUUCGUCUGUAUGGCUGGUUUAA | | |
| siP300-2 | GCAGCUCAACCAUCCACUATT | | |
| siPSPH-1 | CAGAGAAGAAGGAAUCGAU | | |
| siPSPH-2 | CAAUAUCCCAGCAACCAAU | | |
| siDTYMK-1 | CCCGGAAAGAUCAACUGAATT | | |
| siDTYMK-2 | GGAACAAGUGCCGUUAAUUTT | | |
| siNC | UUCUUCGAACGUGUCACGUTT | | |
