# Supplementary material for: Targeting p300/CBP Attenuates Hepatocellular Carcinoma Progression through Epigenetic Regulation of Metabolism
Source: Oxford University Press journal article supplement (doi:10.1158/0008-5472.can-20-1323), 2020-12-23
Supplement: 00085472can201323-sup-241667_3_supp_6772393_ql0j21.xls [file 00085472can201323-sup-241667_3_supp_6772393_ql0j21.xls]

## Sheet: treatmentVScontrol.log2FC0.FDR0
gene_id	log2FoldChange	pvalue	padj	Style
CLDN14	-7.97669	2.48588e-07	1.42141e-06	down
CYP4F12	-6.88275	1.11643e-41	4.88621e-40	down
GRAMD1B	-6.7701	5.24004e-05	0.000217096	down
PRODH2	-6.62828	1.46537e-09	1.10623e-08	down
PGLYRP2	-6.56032	0.000124556	0.00047929	down
SLC22A7	-6.53243	2.4574e-13	2.6254e-12	down
TUBA4B	-6.3513	0.000263187	0.000952477	down
C7	-6.3483	0.000263583	0.00095342	down
LDLRAD1	-6.29813	4.31115e-05	0.000181666	down
S100A9	-6.15936	4.92952e-15	6.09101e-14	down
FUT6	-6.14703	0.000577412	0.00194814	down
SERPINA11	-6.14353	0.000609553	0.00204724	down
CDKN1C	-6.01695	0.000905727	0.00293316	down
UPK3A	-5.8856	0.000193245	0.000718989	down
CCDC198	-5.87298	2.07784e-13	2.22836e-12	down
C6	-5.80019	0.000256815	0.000932056	down
L1CAM	-5.7769	0.00220142	0.00659301	down
CNTN4	-5.76334	0.00209177	0.00630222	down
IL1RN	-5.75428	0.00222316	0.00665528	down
C4BPA	-5.67666	2.22605e-20	3.8232e-19	down
UROC1	-5.64873	2.23179e-09	1.64763e-08	down
TBX10	-5.59933	0.000479622	0.00164347	down
OTC	-5.56032	0.00412484	0.0116249	down
SSTR3	-5.45486	0.00078421	0.00257535	down
PLG	-5.42266	1.38412e-70	1.35038e-68	down
RHEX	-5.3483	0.00743503	0.0196862	down
HRH4	-5.33618	0.00802687	0.0210784	down
RBP2	-5.29948	1.60487e-12	1.61049e-11	down
ELAVL4	-5.22604	0.010478	0.0266532	down
PI3	-5.21948	0.010641	0.0270238	down
CGA	-5.21481	1.04111e-05	4.82726e-05	down
SLC26A3	-5.10186	2.26609e-09	1.6712e-08	down
LCN15	-5.09247	0.015061	0.0367901	down
ADH6	-4.99144	6.45251e-60	4.82188e-58	down
SULT2A1	-4.97665	1.98357e-45	9.84705e-44	down
ADH4	-4.95632	0.00391979	0.0110982	down
SOAT2	-4.94611	6.9716e-69	6.57342e-67	down
CIDEC	-4.87651	3.28978e-17	4.75496e-16	down
C8A	-4.77049	6.57671e-68	6.07869e-66	down
SLC17A1	-4.73254	8.56332e-08	5.19232e-07	down
GJB1	-4.68723	1.84644e-101	3.36891e-99	down
CTXND1	-4.68009	5.50044e-58	3.90281e-56	down
C8B	-4.53099	1.30011e-05	5.93608e-05	down
CYP4F3	-4.50236	2.38861e-109	5.08449e-107	down
INHBB	-4.49632	6.35804e-28	1.58657e-26	down
ZG16	-4.43807	3.51071e-17	5.05867e-16	down
PLEKHB1	-4.33335	2.17307e-38	8.29604e-37	down
CYP2B6	-4.21463	1.59695e-13	1.7365e-12	down
TNFSF15	-4.04171	0.000334507	0.00118048	down
SLC6A11	-3.99085	2.85959e-179	1.48794e-176	down
GRID2	-3.98689	0.00365544	0.0104155	down
MAT1A	-3.94114	9.35225e-09	6.39055e-08	down
SCML1	-3.93764	0.000408807	0.00141881	down
SLC5A9	-3.83691	1.78371e-129	4.9136e-127	down
CLCN1	-3.83132	9.76474e-05	0.000383627	down
TDRD15	-3.82819	0.00669394	0.0179093	down
SLC51B	-3.80858	1.76758e-31	5.17349e-30	down
NUGGC	-3.80675	0.0011096	0.0035237	down
RELN	-3.78491	6.95667e-72	7.34844e-70	down
AGXT2	-3.78455	1.33343e-37	4.98228e-36	down
CCR6	-3.77321	1.74013e-134	5.43267e-132	down
CLRN3	-3.77134	8.5585e-69	8.01589e-67	down
LAD1	-3.7419	2.03395e-106	4.14131e-104	down
DDC	-3.68259	1.93305e-22	3.69488e-21	down
SERPINC1	-3.66502	5.9287e-72	6.31003e-70	down
JCAD	-3.66005	7.23242e-81	9.77003e-79	down
PIWIL2	-3.64335	0.00197469	0.00597126	down
EDNRB	-3.60634	9.94544e-12	9.21469e-11	down
GPAM	-3.59748	1.05019e-149	3.98759e-147	down
APOH	-3.58327	3.07558e-134	9.39323e-132	down
HPR	-3.57239	1.63725e-13	1.77619e-12	down
F12	-3.56544	3.66229e-142	1.35399e-139	down
ENPP7	-3.56223	4.6298e-08	2.88974e-07	down
KCNJ16	-3.55581	6.41606e-25	1.40404e-23	down
ITIH1	-3.55174	0.000125065	0.000480984	down
SLC39A5	-3.54412	9.23918e-128	2.49618e-125	down
RHBG	-3.5422	2.51759e-47	1.33976e-45	down
CCL20	-3.52476	5.72589e-169	2.87297e-166	down
SLC6A14	-3.51394	3.26946e-64	2.71791e-62	down
SLC22A3	-3.51314	2.21123e-22	4.20373e-21	down
CREB3L3	-3.51121	6.6069e-62	5.1282e-60	down
AKR1B10	-3.50759	2.53513e-09	1.86277e-08	down
SEMA6B	-3.50536	3.47635e-91	5.48755e-89	down
ACSM2A	-3.49368	4.84002e-12	4.65258e-11	down
TMEM88B	-3.48768	0.0166825	0.0402771	down
FOXN4	-3.45422	2.71904e-19	4.34582e-18	down
ACSM1	-3.43881	0.00459153	0.0127989	down
ADCY10	-3.38618	3.75598e-09	2.7005e-08	down
PDZK1	-3.38346	9.29542e-115	2.14084e-112	down
NAT8	-3.38311	8.63648e-30	2.3791e-28	down
COL4A1	-3.37403	2.10468e-16	2.89038e-15	down
SCGN	-3.33709	6.67658e-57	4.62065e-55	down
CA5A	-3.32908	2.48489e-23	4.98007e-22	down
DAB1	-3.32357	1.40328e-25	3.15436e-24	down
ADRA2C	-3.32146	3.32255e-38	1.25818e-36	down
CDC20B	-3.27531	4.70754e-06	2.2964e-05	down
FUT3	-3.26167	0.00026177	0.000947838	down
GPR119	-3.23063	0.00274448	0.00804953	down
FABP1	-3.22799	4.71056e-166	2.20596e-163	down
LYPD6B	-3.20455	4.76004e-07	2.62045e-06	down
TLX1	-3.18217	2.21451e-10	1.82046e-09	down
ABCB11	-3.16725	0.0139203	0.034311	down
C3	-3.13375	0	0	down
SORCS2	-3.12561	0.000200099	0.000742721	down
SMIM32	-3.10752	2.10093e-08	1.37603e-07	down
ACSM2B	-3.0571	1.63336e-22	3.13914e-21	down
SPHK1	-3.04333	1.12606e-114	2.55162e-112	down
MAB21L3	-3.03642	0.00715913	0.0190058	down
C11orf53	-3.03511	0.00771832	0.0203519	down
HABP2	-3.0231	2.87034e-27	6.88146e-26	down
MGLL	-3.02298	6.16112e-120	1.51855e-117	down
IL1R2	-3.01928	2.13996e-05	9.46015e-05	down
SLCO1B3	-3.01755	3.12306e-17	4.52795e-16	down
GRM7	-3.01444	0.00307739	0.00891427	down
MLXIPL	-3.00011	6.98622e-42	3.0962e-40	down
SERPINA4	-2.98752	1.48713e-27	3.60219e-26	down
TRIM67	-2.98686	1.63821e-09	1.22879e-08	down
SLC19A3	-2.98077	8.34363e-41	3.46804e-39	down
SYN3	-2.97912	9.01127e-07	4.83204e-06	down
GRHL2	-2.96369	0.00860434	0.0224563	down
SLC5A11	-2.96272	6.71866e-10	5.2791e-09	down
TINAGL1	-2.95622	2.36334e-30	6.68058e-29	down
AADAC	-2.94987	6.20421e-17	8.84005e-16	down
C1orf116	-2.94214	0.000710852	0.00235871	down
EMX1	-2.93311	2.19038e-08	1.43129e-07	down
TFR2	-2.93251	3.71438e-30	1.03538e-28	down
TSPAN18	-2.91718	6.56522e-08	4.01894e-07	down
PCSK9	-2.91385	0	0	down
SARDH	-2.88498	8.46684e-125	2.24435e-122	down
GC	-2.87666	2.38584e-138	7.98065e-136	down
B4GALNT2	-2.86769	1.65031e-09	1.23654e-08	down
TBX4	-2.86012	8.21543e-08	4.98569e-07	down
ODAM	-2.85746	1.07089e-05	4.95553e-05	down
LIPC	-2.84885	1.54447e-118	3.74108e-116	down
HAMP	-2.84798	7.2601e-39	2.81947e-37	down
CTSE	-2.84244	3.66759e-41	1.55667e-39	down
TENM2	-2.82798	1.80396e-46	9.28344e-45	down
LIPG	-2.82782	1.67895e-41	7.32533e-40	down
MYO1A	-2.82571	3.27434e-15	4.12198e-14	down
MRO	-2.79	5.43829e-07	2.9717e-06	down
HMCN2	-2.77647	1.31566e-12	1.32881e-11	down
ACOX2	-2.77452	8.67633e-25	1.89276e-23	down
C4BPB	-2.77283	2.61026e-28	6.61941e-27	down
ANGPTL8	-2.76553	1.95643e-08	1.28619e-07	down
SLC17A4	-2.76138	0.0188347	0.0446899	down
UNC5B	-2.75011	9.5856e-63	7.60837e-61	down
ADGRD1	-2.74962	1.02552e-29	2.80301e-28	down
KRTAP19-5	-2.74789	6.65104e-05	0.000269203	down
KIAA1324	-2.7449	0.00222979	0.00667086	down
AGXT	-2.73895	1.76411e-14	2.04488e-13	down
ACSL5	-2.72366	7.86613e-08	4.78404e-07	down
UBASH3B	-2.72152	4.41003e-38	1.66103e-36	down
VSIR	-2.6987	1.17134e-23	2.40587e-22	down
F13B	-2.69046	2.99954e-30	8.44499e-29	down
FAM151A	-2.68035	1.15705e-28	2.99914e-27	down
PHEX	-2.64628	7.01925e-09	4.87703e-08	down
SLCO1B1	-2.62529	9.87301e-05	0.000387122	down
AFF3	-2.61878	1.34609e-28	3.47632e-27	down
MAB21L4	-2.61843	8.19946e-27	1.92955e-25	down
TMPRSS6	-2.6163	3.02366e-46	1.55034e-44	down
VSIG1	-2.61324	0.000112571	0.000436641	down
GRB7	-2.61237	7.25337e-15	8.8151e-14	down
AP1M2	-2.57743	1.08588e-196	6.63284e-194	down
CA8	-2.55576	2.99772e-07	1.69682e-06	down
ZC3H12D	-2.55032	6.93457e-08	4.23397e-07	down
HP	-2.54861	3.16868e-08	2.02257e-07	down
ADGRG7	-2.54572	0.0107222	0.0272054	down
SV2C	-2.5296	1.41505e-08	9.46218e-08	down
HPSE2	-2.51408	0.0128846	0.0320267	down
SALL1	-2.51371	6.11539e-15	7.4839e-14	down
APOC3	-2.50338	4.43036e-65	3.79525e-63	down
SLC6A4	-2.49397	1.06679e-10	9.0122e-10	down
AGT	-2.4829	0	0	down
CRLF1	-2.46975	8.34338e-113	1.8315e-110	down
HOXD1	-2.45967	0.000290001	0.00103696	down
SLC30A10	-2.44686	2.564e-37	9.55481e-36	down
NECAB2	-2.43866	0.000276068	0.000992448	down
HKDC1	-2.42356	3.09008e-10	2.5094e-09	down
HPD	-2.42328	0.000111055	0.000431475	down
TMEM86B	-2.41853	1.24615e-55	8.49866e-54	down
GLI1	-2.41468	4.7279e-05	0.000197921	down
ST6GAL1	-2.40797	1.54474e-262	1.4468e-259	down
ORM1	-2.40565	1.31436e-151	5.27586e-149	down
NPTX2	-2.39999	1.08171e-15	1.40974e-14	down
HSD11B2	-2.38277	6.64917e-31	1.91423e-29	down
LGALS2	-2.377	7.08409e-11	6.0834e-10	down
GPD1	-2.37693	1.83218e-06	9.40799e-06	down
PALM2	-2.3718	3.25233e-06	1.61456e-05	down
DPP4	-2.36987	4.62468e-293	7.21912e-290	down
CLEC10A	-2.36616	0.00817645	0.0214391	down
ORM2	-2.36403	2.47909e-100	4.46522e-98	down
GDA	-2.36013	5.38688e-39	2.11397e-37	down
BRINP2	-2.36001	0.00288645	0.00842195	down
CLDN6	-2.35566	2.22709e-32	6.87657e-31	down
PDE4B	-2.35203	0.000499315	0.00170554	down
EVA1A	-2.34072	3.60153e-07	2.01264e-06	down
A1BG	-2.33759	3.86382e-57	2.68727e-55	down
SYNE1	-2.32452	1.39358e-51	8.4755e-50	down
PLAU	-2.32361	0.00639259	0.0171851	down
GNAZ	-2.31636	2.26123e-20	3.87888e-19	down
CDH17	-2.31578	6.96662e-26	1.58629e-24	down
CA2	-2.3129	2.16815e-60	1.62889e-58	down
EFCAB12	-2.30215	1.68334e-05	7.56532e-05	down
PKD2L1	-2.30095	0.00108539	0.00345069	down
SLCO2B1	-2.29409	1.61964e-120	4.06327e-118	down
CPN1	-2.28507	2.1547e-39	8.64898e-38	down
AP003071.5	-2.28178	0.000665524	0.00222089	down
NEGR1	-2.27668	6.4656e-05	0.000262302	down
BEST3	-2.27294	0.00162932	0.00501432	down
DBH	-2.26739	2.36199e-05	0.00010369	down
NCMAP	-2.26071	0.000221267	0.000813124	down
NCKAP5	-2.25985	6.78585e-06	3.23497e-05	down
MISP	-2.24878	2.64046e-10	2.15673e-09	down
MRGPRF	-2.24551	0.00310104	0.00897724	down
SULT1B1	-2.23959	1.87553e-07	1.08657e-06	down
BHLHA15	-2.2317	1.33462e-18	2.06726e-17	down
SERPINF2	-2.23051	9.87004e-65	8.35326e-63	down
ADGRF5	-2.23003	0.000242672	0.000884842	down
DPYD	-2.21516	7.51026e-31	2.14455e-29	down
TNNI1	-2.21295	1.47138e-05	6.6682e-05	down
ENTPD2	-2.20528	2.96975e-08	1.90599e-07	down
ESPN	-2.20508	1.08254e-34	3.6211e-33	down
MUC13	-2.20367	3.93564e-07	2.18458e-06	down
SLC7A9	-2.20295	0.000108985	0.00042402	down
PRG4	-2.19585	0.00965203	0.0248787	down
KLF4	-2.18691	9.61617e-09	6.55814e-08	down
PTGDR2	-2.1804	7.45644e-14	8.31393e-13	down
VDR	-2.16316	0.00992541	0.0254689	down
ABCC2	-2.16156	1.11143e-195	6.50601e-193	down
TGFBI	-2.1559	0	0	down
CPB2	-2.15343	4.81234e-79	6.03648e-77	down
CD38	-2.15278	1.05055e-20	1.83344e-19	down
SLCO4C1	-2.14899	8.81017e-51	5.24467e-49	down
PLEKHG6	-2.13987	6.1944e-52	3.7837e-50	down
SULF2	-2.13696	1.62491e-06	8.43352e-06	down
SMLR1	-2.13388	2.04855e-41	8.80125e-40	down
LECT2	-2.11798	7.78514e-05	0.000310897	down
MTTP	-2.11737	1.00483e-149	3.92136e-147	down
ZDHHC19	-2.11256	0.000272106	0.000980713	down
VAV3	-2.11004	1.09363e-07	6.5214e-07	down
RASGRP2	-2.10707	3.89941e-16	5.24739e-15	down
GPT	-2.10256	4.24154e-11	3.72201e-10	down
TMEM150B	-2.09965	5.80053e-07	3.1635e-06	down
MLIP	-2.0914	0.00129948	0.00407054	down
DGKK	-2.07389	4.47028e-79	5.65792e-77	down
FGFR4	-2.07254	0	0	down
FAM19A4	-2.0701	2.09751e-08	1.37455e-07	down
MUC3A	-2.05596	4.10128e-06	2.01464e-05	down
PKIB	-2.02238	4.09456e-73	4.52949e-71	down
ST3GAL1	-2.01793	1.04816e-44	5.09535e-43	down
ASGR1	-2.01252	3.75469e-184	2.02883e-181	down
AMOT	-2.01227	0.020235	0.0476823	down
TRHDE	-1.99935	1.32883e-08	8.89411e-08	down
CDHR2	-1.99847	1.29622e-19	2.11751e-18	down
LOXL4	-1.9909	1.19101e-72	1.29709e-70	down
PGC	-1.97583	4.41599e-05	0.000185805	down
ISX	-1.96609	6.35329e-11	5.47928e-10	down
CPLX1	-1.96006	3.64558e-16	4.91996e-15	down
PPP2R2B	-1.95985	0.000143277	0.000544467	down
COL9A3	-1.95511	2.51462e-21	4.55844e-20	down
COBL	-1.94996	3.58046e-48	1.97262e-46	down
FYB2	-1.93856	4.50062e-05	0.00018897	down
STX1B	-1.93715	0.00511737	0.0141079	down
KITLG	-1.93444	3.75144e-54	2.41761e-52	down
ABCG2	-1.93222	9.0479e-15	1.08552e-13	down
ANXA9	-1.93074	3.47223e-30	9.73681e-29	down
COL16A1	-1.92606	2.27839e-27	5.48478e-26	down
HMGCS1	-1.9184	7.6661e-300	1.34626e-296	down
KANK4	-1.91415	4.75983e-19	7.5475e-18	down
GPX2	-1.91283	8.60998e-07	4.62215e-06	down
OLFM3	-1.9069	0.00087166	0.00283406	down
AGMAT	-1.90078	1.05272e-156	4.34991e-154	down
CPN2	-1.89962	4.65647e-32	1.40083e-30	down
SYT2	-1.89845	6.73284e-09	4.68962e-08	down
REEP6	-1.89695	2.74345e-93	4.4302e-91	down
NTN4	-1.89582	1.95512e-10	1.61955e-09	down
USH1C	-1.89073	3.41651e-62	2.66658e-60	down
SUSD2	-1.8903	4.53712e-15	5.62595e-14	down
SLC7A10	-1.888	1.51867e-31	4.47291e-30	down
GLYCTK	-1.88621	1.59374e-93	2.60355e-91	down
SIPA1L2	-1.88445	2.26382e-35	7.81436e-34	down
GLUD1	-1.88321	2.20983e-270	2.58716e-267	down
NPPB	-1.87808	9.9703e-28	2.44882e-26	down
LAMA4	-1.87588	3.67714e-10	2.95539e-09	down
OSGIN1	-1.87114	3.42388e-47	1.81517e-45	down
SLC7A5	-1.86904	4.511e-216	3.16875e-213	down
MOGAT3	-1.86666	5.8569e-21	1.04288e-19	down
PLLP	-1.86198	5.17945e-25	1.13875e-23	down
CPA6	-1.85332	0.000969611	0.00312096	down
OPRD1	-1.84413	0.0208905	0.0490214	down
TFF2	-1.84264	1.66236e-05	7.47823e-05	down
KL	-1.8374	0.0173053	0.0415167	down
MAP2	-1.83715	1.81294e-19	2.93772e-18	down
PNPLA3	-1.83576	4.29791e-20	7.23997e-19	down
MYORG	-1.83469	3.51833e-63	2.84075e-61	down
LPAR3	-1.83202	2.85415e-21	5.14736e-20	down
CRYBG2	-1.82801	1.61978e-09	1.21691e-08	down
MVD	-1.8257	5.44395e-48	2.97596e-46	down
NT5E	-1.82354	8.99438e-70	8.71462e-68	down
UPP1	-1.81637	1.63982e-16	2.27198e-15	down
PRR5	-1.81197	7.01548e-31	2.00734e-29	down
SYT12	-1.80683	1.51414e-23	3.0874e-22	down
PON1	-1.8066	5.82088e-20	9.73542e-19	down
AGFG2	-1.80507	7.67769e-137	2.50846e-134	down
SULT1E1	-1.80436	0.0184298	0.0438179	down
CYP19A1	-1.80079	0.00600108	0.0162647	down
CDH1	-1.79826	1.01529e-71	1.06446e-69	down
CER1	-1.79391	1.38361e-06	7.25582e-06	down
ABLIM3	-1.79185	0.00101311	0.00324365	down
APOA2	-1.77948	2.22863e-278	3.131e-275	down
PTN	-1.77253	9.96217e-05	0.0003904	down
DCDC1	-1.77209	8.8103e-18	1.31258e-16	down
GPR39	-1.77195	0.000181698	0.000679444	down
PALM3	-1.7693	7.40052e-14	8.25814e-13	down
CLDN4	-1.76798	0.000598404	0.00201509	down
PRLR	-1.76665	2.1351e-47	1.14489e-45	down
ABCG8	-1.7593	6.98622e-11	6.00302e-10	down
GBA3	-1.75913	1.62679e-53	1.03415e-51	down
HS3ST3B1	-1.75903	1.67027e-11	1.51782e-10	down
GGT1	-1.75224	3.44524e-29	9.13247e-28	down
FREM1	-1.74765	8.67747e-27	2.03862e-25	down
KYNU	-1.74459	5.40242e-05	0.000223231	down
PITPNM2	-1.74223	2.34309e-10	1.9239e-09	down
ACSM3	-1.74098	0.000275181	0.000990018	down
PECR	-1.74007	1.24226e-71	1.28327e-69	down
VSNL1	-1.739	8.86359e-57	6.10415e-55	down
B3GALT1	-1.73763	6.18865e-05	0.000252159	down
THBS4	-1.73168	1.65055e-26	3.86477e-25	down
DGAT2	-1.73017	8.57631e-71	8.42577e-69	down
TFEC	-1.72485	9.32468e-05	0.000367984	down
MVK	-1.72423	9.95778e-68	9.14359e-66	down
MPV17L	-1.72286	0.0111841	0.0282447	down
HGFAC	-1.7222	5.10034e-05	0.000211871	down
TM4SF5	-1.71839	6.83617e-47	3.57031e-45	down
ASGR2	-1.71278	2.18971e-191	1.23053e-188	down
SGK2	-1.71277	6.76151e-05	0.000273124	down
PHYHIPL	-1.71158	1.27521e-08	8.55563e-08	down
SMOX	-1.70852	1.58076e-74	1.83538e-72	down
CAMK2N1	-1.70633	3.51313e-58	2.54412e-56	down
DRC7	-1.69529	0.00460553	0.0128303	down
TRPC6	-1.69372	0.000361775	0.00126811	down
ACMSD	-1.68907	5.50292e-05	0.000226783	down
TMEM51	-1.68733	1.86113e-07	1.07867e-06	down
OAF	-1.6849	3.82243e-30	1.06339e-28	down
SERPINA7	-1.68356	8.4368e-05	0.00033511	down
GAL	-1.68281	1.43043e-06	7.48182e-06	down
PKDCC	-1.68005	1.52405e-45	7.61972e-44	down
STEAP1	-1.67752	2.39402e-25	5.33867e-24	down
INSIG1	-1.67442	2.1853e-71	2.20873e-69	down
TSPAN8	-1.67399	5.35608e-23	1.05833e-21	down
AQP10	-1.67269	0.0014642	0.00453994	down
MPP1	-1.66327	1.47989e-10	1.23904e-09	down
DAO	-1.6628	0.018278	0.0435308	down
HMX3	-1.66269	6.15848e-12	5.84598e-11	down
PYY	-1.66186	0.0181982	0.0433627	down
SCD	-1.66164	6.95268e-240	5.74578e-237	down
LFNG	-1.65984	1.81752e-08	1.19879e-07	down
SLC51A	-1.65868	1.94461e-06	9.9345e-06	down
FTCD	-1.65811	8.07354e-09	5.56006e-08	down
CLDN2	-1.65687	8.79411e-09	6.02675e-08	down
SERPIND1	-1.65364	2.91498e-66	2.57563e-64	down
ZCCHC2	-1.65312	1.43224e-16	1.99421e-15	down
ICOSLG	-1.65037	0.000118866	0.000458776	down
CFI	-1.65007	6.32745e-08	3.88016e-07	down
STK32C	-1.64769	1.2107e-24	2.62486e-23	down
ISM1	-1.64706	0.00265202	0.00780605	down
SYBU	-1.64689	1.00805e-07	6.04188e-07	down
SOX9	-1.64076	1.06983e-105	2.0875e-103	down
ELOVL2	-1.63828	3.32074e-57	2.32105e-55	down
PIPOX	-1.6374	1.43684e-05	6.52008e-05	down
EEPD1	-1.63623	1.18643e-19	1.94721e-18	down
TRIM47	-1.63203	1.01683e-20	1.78173e-19	down
DHCR7	-1.63188	1.74267e-267	1.88329e-264	down
IL22RA1	-1.62857	4.26443e-12	4.11759e-11	down
NECTIN1	-1.62464	3.47102e-37	1.28327e-35	down
TMEM200A	-1.62097	4.04638e-12	3.92594e-11	down
ARG1	-1.61979	1.10965e-09	8.50029e-09	down
VWCE	-1.6152	6.98093e-71	6.9067e-69	down
DKK1	-1.61386	7.51369e-94	1.24188e-91	down
MYCN	-1.61281	1.22973e-76	1.5023e-74	down
ONECUT2	-1.61015	1.06211e-46	5.50611e-45	down
PPARGC1B	-1.6097	5.39377e-08	3.33673e-07	down
ARHGAP26	-1.60859	7.63174e-21	1.34696e-19	down
NDRG1	-1.60567	1.87099e-32	5.80256e-31	down
POU2AF1	-1.60408	8.18098e-06	3.85686e-05	down
B4GALNT1	-1.60059	8.9719e-36	3.1433e-34	down
FETUB	-1.59754	0.000548018	0.00186014	down
AFP	-1.59748	3.02594e-274	3.86467e-271	down
ALDH1L1	-1.59397	5.0137e-05	0.00020858	down
SULT1C4	-1.5867	5.03111e-14	5.66817e-13	down
CDKN1A	-1.58652	1.52691e-15	1.9771e-14	down
GCKR	-1.58649	3.30193e-07	1.85778e-06	down
GSTO1	-1.58012	1.64075e-162	6.98512e-160	down
GCNT3	-1.57821	2.10073e-16	2.88779e-15	down
KHK	-1.57754	8.27706e-15	1.00159e-13	down
FRMD3	-1.57447	1.52285e-06	7.94451e-06	down
MSMO1	-1.57016	1.75892e-141	6.33616e-139	down
PLA2G7	-1.56832	2.83514e-17	4.11902e-16	down
SPTLC3	-1.56722	2.32736e-25	5.19827e-24	down
SLC6A13	-1.56669	9.31278e-05	0.000367618	down
IL18	-1.56488	1.08038e-27	2.64431e-26	down
APOB	-1.56264	7.01353e-44	3.29542e-42	down
SERPINA5	-1.56184	7.17066e-75	8.39505e-73	down
BLVRB	-1.55583	3.2441e-40	1.33655e-38	down
BIN1	-1.55388	2.84483e-61	2.18399e-59	down
KIAA1217	-1.55138	7.89117e-22	1.4549e-20	down
VTN	-1.54966	2.34067e-221	1.73074e-218	down
GUCY1A2	-1.54964	0.0130761	0.032434	down
P2RY2	-1.54926	3.3524e-05	0.000144119	down
CNNM1	-1.54757	1.057e-31	3.13287e-30	down
ADAP1	-1.54755	0.000382662	0.00133334	down
CARD10	-1.54638	5.70992e-48	3.09725e-46	down
CLU	-1.54616	1.04744e-254	9.19717e-252	down
PAH	-1.5457	4.09215e-24	8.5679e-23	down
FAM20C	-1.54304	2.23388e-15	2.84532e-14	down
CHN2	-1.54251	0.00439327	0.0122828	down
CRB2	-1.54015	3.15485e-05	0.000136084	down
NFIX	-1.53319	2.14034e-10	1.76361e-09	down
CYP39A1	-1.52902	2.68575e-15	3.41158e-14	down
TUBA4A	-1.52803	1.02921e-32	3.21319e-31	down
ELF3	-1.52752	1.30017e-17	1.92274e-16	down
NR0B2	-1.52596	1.84751e-21	3.36649e-20	down
BTBD16	-1.5233	0.00871618	0.0227271	down
MT1A	-1.51525	3.65635e-06	1.80429e-05	down
FLNC	-1.51183	2.41607e-07	1.38431e-06	down
ATP2B2	-1.50984	1.20846e-108	2.49671e-106	down
S100A10	-1.50979	2.15024e-65	1.86474e-63	down
PPP1R14A	-1.50918	0.000255341	0.000927425	down
APOA1	-1.50795	2.53456e-165	1.11275e-162	down
HDHD3	-1.50664	2.90251e-23	5.80048e-22	down
IGSF1	-1.50489	2.37307e-65	2.04535e-63	down
CXCL5	-1.49635	3.829e-11	3.37052e-10	down
SEMA3B	-1.49585	6.48256e-17	9.22731e-16	down
CXCL6	-1.49552	0.00065614	0.00219166	down
CHDH	-1.49369	2.7726e-38	1.05276e-36	down
GDPD5	-1.48948	0.000128641	0.000493386	down
ITGA1	-1.48864	4.69732e-43	2.15662e-41	down
TEX15	-1.48577	9.42978e-28	2.32012e-26	down
TMEM37	-1.4856	1.355e-56	9.28608e-55	down
PLA2G4A	-1.48537	1.15559e-05	5.32467e-05	down
ATP7B	-1.48523	2.13822e-69	2.05752e-67	down
F11	-1.48215	9.79488e-06	4.55808e-05	down
ITGAL	-1.47587	1.20754e-14	1.43163e-13	down
ETS2	-1.47544	7.03041e-42	3.10598e-40	down
SHB	-1.47044	5.28857e-11	4.59487e-10	down
SLC13A5	-1.46963	1.94396e-25	4.34884e-24	down
GLUD2	-1.46899	1.27768e-54	8.34888e-53	down
MPC1	-1.46606	1.94103e-41	8.39063e-40	down
C1orf210	-1.46516	0.00589852	0.0160225	down
PCYT1B	-1.46478	0.00462524	0.0128775	down
STEAP3	-1.46328	8.56517e-36	3.0083e-34	down
NPAS2	-1.46257	5.3396e-17	7.62358e-16	down
CA12	-1.46242	5.9037e-19	9.28791e-18	down
LRMP	-1.46101	2.07808e-14	2.39893e-13	down
TMEM74B	-1.46041	0.00276007	0.00808342	down
TNFAIP3	-1.46027	1.45887e-09	1.10192e-08	down
HPX	-1.45963	3.64344e-39	1.44188e-37	down
GJA1	-1.45963	2.01974e-91	3.22447e-89	down
SLC17A2	-1.45784	0.0031647	0.00914644	down
RCAN1	-1.45368	8.2285e-53	5.11514e-51	down
SERPINE2	-1.44862	6.56801e-19	1.03099e-17	down
RAPGEF5	-1.44795	1.47659e-19	2.40657e-18	down
FBXO2	-1.4473	1.06468e-23	2.19322e-22	down
KRT19	-1.44717	9.82745e-86	1.40884e-83	down
METTL7A	-1.44706	5.18429e-55	3.41944e-53	down
INHBE	-1.44105	2.44221e-09	1.79731e-08	down
SSTR2	-1.43577	2.23246e-28	5.67158e-27	down
CRYZ	-1.43575	1.96463e-80	2.62867e-78	down
IL17RB	-1.42932	1.49462e-29	4.04585e-28	down
MMAB	-1.42698	3.14831e-64	2.63278e-62	down
PTPRB	-1.42429	0.00640759	0.0172189	down
PLA2G12B	-1.42058	8.35345e-18	1.24849e-16	down
GOLT1A	-1.41408	9.21548e-14	1.01783e-12	down
ARID5A	-1.4092	8.03114e-11	6.85893e-10	down
NAV3	-1.4089	0.00616413	0.016657	down
STARD10	-1.40621	5.32148e-65	4.531e-63	down
STXBP6	-1.40485	1.02557e-06	5.4618e-06	down
MMP15	-1.40242	9.18937e-99	1.6342e-96	down
OLFML3	-1.40063	3.97315e-33	1.26861e-31	down
SLC38A3	-1.39976	5.37958e-40	2.20987e-38	down
RIN3	-1.39922	9.02088e-08	5.45563e-07	down
GNAL	-1.39906	8.65532e-12	8.09039e-11	down
BCAN	-1.39674	1.44907e-21	2.65424e-20	down
SLC25A15	-1.39431	1.08707e-27	2.65604e-26	down
SFXN3	-1.39286	2.19934e-18	3.37319e-17	down
C1orf115	-1.38988	3.41411e-39	1.35494e-37	down
NSDHL	-1.38872	6.53711e-37	2.37927e-35	down
CXCL8	-1.38855	1.2017e-16	1.68659e-15	down
CYP27A1	-1.38823	1.06406e-29	2.89709e-28	down
NES	-1.38805	8.00935e-88	1.20993e-85	down
SLC23A1	-1.38785	0.000434487	0.00149978	down
MAOB	-1.38599	4.57651e-64	3.78208e-62	down
F2	-1.37795	4.33781e-105	8.23539e-103	down
UPK1A	-1.37445	0.000468124	0.00160681	down
SULT1C2	-1.37404	3.91945e-06	1.92802e-05	down
SRPX2	-1.36944	0.0116718	0.0293444	down
MASP1	-1.36788	1.12142e-105	2.15819e-103	down
PTPRH	-1.36471	0.00251634	0.00744291	down
TIMP3	-1.36461	8.2027e-37	2.97009e-35	down
SEMA4G	-1.36324	3.69917e-59	2.72092e-57	down
FASN	-1.35799	3.51905e-227	2.74662e-224	down
COL26A1	-1.35627	1.41458e-25	3.17467e-24	down
BBOF1	-1.35319	0.000686729	0.00228568	down
ABCC4	-1.34722	3.87008e-29	1.02393e-27	down
CHST13	-1.34709	8.50772e-87	1.24505e-84	down
HEPH	-1.34567	0.012139	0.0303562	down
SLC37A2	-1.34215	0.0206295	0.048498	down
MSRB1	-1.34057	4.08723e-58	2.92967e-56	down
TMEM82	-1.34026	2.44547e-05	0.000107196	down
CAV2	-1.3367	4.95825e-13	5.18292e-12	down
SLC2A14	-1.33406	1.81542e-05	8.1148e-05	down
PSPH	-1.33384	4.7663e-58	3.39907e-56	down
LYL1	-1.33216	8.71789e-06	4.08687e-05	down
FRMD4B	-1.32811	0.00182485	0.00556124	down
EEF1AKMT4	-1.32806	4.25626e-07	2.35326e-06	down
ZFAND2A	-1.32535	2.47511e-25	5.50203e-24	down
LPIN1	-1.32533	1.6927e-15	2.18219e-14	down
EPB41L4B	-1.32514	2.19029e-27	5.28717e-26	down
FDPS	-1.3246	6.48968e-141	2.27934e-138	down
ADCY9	-1.3223	3.37613e-72	3.6207e-70	down
SLC47A1	-1.31898	8.45655e-26	1.91932e-24	down
MAMLD1	-1.31767	2.86255e-06	1.43168e-05	down
IDH1	-1.3171	1.75859e-122	4.57528e-120	down
TGM2	-1.31391	1.01234e-25	2.28288e-24	down
KLKB1	-1.31293	0.0188827	0.0447811	down
GSTO2	-1.3129	3.24918e-07	1.83103e-06	down
PYGL	-1.31125	1.86937e-64	1.57262e-62	down
HLF	-1.3094	1.26678e-10	1.06825e-09	down
LGALS3	-1.3061	8.95939e-23	1.74578e-21	down
LGSN	-1.30442	6.72216e-18	1.00897e-16	down
ITPKA	-1.30386	4.04857e-32	1.22056e-30	down
ACADSB	-1.30178	2.44962e-48	1.36027e-46	down
DCDC2	-1.30131	2.83945e-08	1.82653e-07	down
ANKRD33B	-1.29938	1.13145e-11	1.04302e-10	down
ATP5MC1	-1.29747	4.64574e-55	3.07868e-53	down
SERPINA1	-1.29659	4.4641e-136	1.42537e-133	down
TBC1D4	-1.29566	2.98482e-34	9.8436e-33	down
HNF4A	-1.29423	9.50212e-105	1.77994e-102	down
ADAMTS19	-1.29386	0.000230653	0.000844306	down
SEC16B	-1.29271	3.40621e-15	4.28031e-14	down
CEMIP2	-1.29007	2.20482e-131	6.59053e-129	down
GXYLT2	-1.28724	0.0101024	0.0258531	down
GLDC	-1.28538	2.57165e-86	3.72465e-84	down
MREG	-1.28522	6.50767e-06	3.11291e-05	down
ARSE	-1.28456	1.01867e-37	3.82653e-36	down
LSS	-1.28044	5.4463e-35	1.84819e-33	down
TBC1D30	-1.28033	3.63368e-08	2.29128e-07	down
STOM	-1.28012	1.88539e-65	1.64521e-63	down
SYT7	-1.2794	7.57198e-09	5.23517e-08	down
ANXA6	-1.27825	7.08296e-74	8.02488e-72	down
ALDH3B1	-1.27771	6.16125e-09	4.31073e-08	down
SLC22A18	-1.2759	2.07019e-05	9.16902e-05	down
COLCA2	-1.27371	9.49912e-12	8.83412e-11	down
AK4	-1.27106	5.7058e-48	3.09725e-46	down
TIMP4	-1.26969	0.000119335	0.000460102	down
HCAR3	-1.2683	0.00335432	0.00963369	down
SLC16A12	-1.26707	0.00251714	0.00744332	down
CFAP47	-1.26701	1.03246e-06	5.49644e-06	down
PIR	-1.26654	2.19461e-26	5.11311e-25	down
EBP	-1.26521	1.29017e-139	4.42087e-137	down
GLTPD2	-1.25962	1.86636e-41	8.09276e-40	down
CDH9	-1.25852	3.401e-05	0.000146074	down
RASSF5	-1.25731	1.07972e-05	4.99309e-05	down
VIL1	-1.25483	2.1675e-110	4.68481e-108	down
AMT	-1.25239	0.000753028	0.00248515	down
MAFB	-1.2523	0.00030545	0.00108557	down
DMD	-1.24976	7.61461e-22	1.40575e-20	down
FRMD6	-1.24758	1.52134e-10	1.27146e-09	down
PLXNA2	-1.24698	7.80593e-21	1.37598e-19	down
SDF2L1	-1.23992	4.75732e-37	1.74505e-35	down
RASSF4	-1.23983	1.40697e-19	2.29576e-18	down
SEMA7A	-1.23604	1.25859e-05	5.75961e-05	down
TMEM97	-1.23387	2.49054e-73	2.77695e-71	down
ALDH4A1	-1.23214	1.01901e-22	1.98009e-21	down
PTGS1	-1.22975	0.00612894	0.0165755	down
OIT3	-1.22745	1.35065e-06	7.0909e-06	down
C2orf72	-1.225	3.13817e-80	4.15926e-78	down
ABCA1	-1.22209	1.01401e-53	6.47539e-52	down
SYNE3	-1.22204	2.17972e-08	1.42565e-07	down
SLC38A11	-1.21869	2.12246e-18	3.25885e-17	down
VWA1	-1.2171	8.11848e-44	3.80188e-42	down
CNKSR3	-1.20979	1.2145e-32	3.78328e-31	down
GMDS	-1.20966	4.38267e-20	7.37391e-19	down
ANO4	-1.20896	0.0016155	0.00497615	down
AQP3	-1.20872	1.43223e-07	8.42606e-07	down
SLC12A7	-1.20059	8.22599e-13	8.44171e-12	down
HSD17B7	-1.20037	1.28079e-12	1.29545e-11	down
ABCD1	-1.20016	1.11979e-18	1.73834e-17	down
SLC26A10	-1.19972	1.88669e-06	9.6667e-06	down
NOTCH1	-1.19934	2.53911e-12	2.51388e-11	down
SMAGP	-1.19737	5.78522e-08	3.56476e-07	down
TM4SF4	-1.19687	0.000207027	0.000766814	down
TESC	-1.19576	2.47586e-19	3.9798e-18	down
CLDN16	-1.19555	7.48538e-07	4.04003e-06	down
ALAS1	-1.19396	3.71085e-35	1.26538e-33	down
MOCOS	-1.18914	7.18074e-15	8.73439e-14	down
ABCA4	-1.18907	0.0164298	0.0397353	down
TJP2	-1.18578	1.54637e-05	6.98999e-05	down
NDRG4	-1.18518	6.17809e-27	1.45631e-25	down
HSD17B2	-1.18417	5.64558e-05	0.000232186	down
CYP51A1	-1.18347	7.80514e-83	1.09654e-80	down
TMEM205	-1.18269	2.48387e-06	1.253e-05	down
AVPI1	-1.18175	2.04002e-05	9.04392e-05	down
MBL2	-1.17625	9.80612e-06	4.56028e-05	down
GABRG1	-1.17574	8.09785e-12	7.59965e-11	down
SGK1	-1.17252	8.93405e-26	2.02443e-24	down
MYO1E	-1.17225	9.8157e-30	2.68813e-28	down
BHLHE40	-1.16631	8.54555e-17	1.20177e-15	down
RAB11FIP4	-1.1644	1.14045e-28	2.96159e-27	down
SLC2A8	-1.16098	3.43962e-55	2.2902e-53	down
GNPAT	-1.16071	5.41574e-41	2.27802e-39	down
CERS4	-1.16021	3.5888e-16	4.85265e-15	down
ABCC11	-1.15646	0.0188738	0.0447674	down
CDH23	-1.14929	5.13816e-10	4.06682e-09	down
CYP2J2	-1.14822	2.61395e-09	1.91467e-08	down
DBI	-1.1478	9.77863e-98	1.71725e-95	down
MCRIP2	-1.14746	2.23386e-24	4.73357e-23	down
LRRC3	-1.14532	1.57535e-11	1.43435e-10	down
ALDH1B1	-1.14512	1.98486e-24	4.23147e-23	down
MPC2	-1.14355	1.26072e-71	1.29284e-69	down
IRAK2	-1.14349	1.97948e-16	2.73449e-15	down
MAP2K3	-1.14163	1.57738e-34	5.26379e-33	down
CISD1	-1.1414	4.81847e-21	8.60162e-20	down
IL32	-1.14094	2.06546e-12	2.05653e-11	down
KLF15	-1.14045	8.06089e-12	7.57002e-11	down
DPH5	-1.13643	8.35068e-12	7.82125e-11	down
CLYBL	-1.13234	3.64265e-05	0.000155549	down
TBX2	-1.13103	2.13515e-19	3.43999e-18	down
PNMA3	-1.13054	1.87966e-12	1.88086e-11	down
HRG	-1.12804	0.00714447	0.0189812	down
SKP2	-1.12676	3.59843e-74	4.11011e-72	down
SLC9A3R1	-1.12566	2.4258e-90	3.74505e-88	down
GDF7	-1.12479	1.13639e-06	6.02003e-06	down
ZNF563	-1.12355	0.000257742	0.000934722	down
WNK4	-1.12251	1.42917e-14	1.676e-13	down
FBLN5	-1.122	3.71319e-13	3.91936e-12	down
FUOM	-1.12181	1.0221e-13	1.12358e-12	down
LOX	-1.12081	2.48462e-32	7.63815e-31	down
SEC11C	-1.11968	5.34652e-20	8.95271e-19	down
P2RY6	-1.11953	1.11284e-06	5.9064e-06	down
COTL1	-1.11738	2.027e-12	2.01967e-11	down
MST1	-1.11556	4.44345e-16	5.951e-15	down
HJV	-1.11293	0.00962887	0.0248314	down
ACAA1	-1.11211	1.50399e-44	7.261e-43	down
POLRMT	-1.10984	3.65427e-66	3.20868e-64	down
SCTR	-1.10973	0.0138771	0.0342232	down
B4GALT1	-1.1079	8.72631e-47	4.54059e-45	down
IQGAP2	-1.10738	9.57216e-42	4.20248e-40	down
MSI1	-1.10657	6.79901e-15	8.2916e-14	down
HSPD1	-1.09809	5.57185e-115	1.30465e-112	down
VSIG10L	-1.09221	0.0127866	0.0318284	down
PHLDA1	-1.09142	3.12903e-31	9.06387e-30	down
ALG14	-1.09034	3.58127e-10	2.8899e-09	down
PPA1	-1.09029	3.2551e-41	1.38578e-39	down
CDHR3	-1.09016	0.0012888	0.00404071	down
SRXN1	-1.08905	0.00143141	0.00444515	down
CDH6	-1.08835	8.61664e-08	5.2179e-07	down
PROZ	-1.08797	5.4663e-09	3.8398e-08	down
ACACA	-1.08728	0.0086795	0.0226357	down
STC2	-1.08585	2.59263e-24	5.47727e-23	down
ANXA4	-1.0844	5.46307e-41	2.29106e-39	down
ASB9	-1.08392	0.000271445	0.000978833	down
HMGA1	-1.08284	3.5199e-74	4.05337e-72	down
ABCB1	-1.08272	1.42972e-27	3.46912e-26	down
RBP4	-1.08269	1.40047e-130	4.09899e-128	down
NAGS	-1.07978	8.98235e-05	0.000355473	down
FAM107B	-1.07803	2.04155e-27	4.93661e-26	down
CLUH	-1.07725	4.73034e-81	6.45209e-79	down
MYC	-1.07638	4.7746e-27	1.13885e-25	down
NARS2	-1.07583	1.9157e-15	2.45787e-14	down
CORO2A	-1.07457	4.05171e-22	7.63035e-21	down
OAS1	-1.07455	0.00572764	0.0156053	down
ITGA2	-1.06995	1.42708e-24	3.07973e-23	down
KLHL13	-1.06927	7.57086e-06	3.58608e-05	down
AGPAT2	-1.06919	4.65574e-46	2.36987e-44	down
LEF1	-1.068	9.72861e-08	5.85342e-07	down
BICC1	-1.06604	1.75091e-31	5.1354e-30	down
ADAMTSL4	-1.06407	1.28172e-14	1.51192e-13	down
SNAI1	-1.06164	1.36417e-05	6.2144e-05	down
MTM1	-1.05943	2.91931e-13	3.11179e-12	down
ATP10D	-1.05933	1.58582e-16	2.19932e-15	down
SH3KBP1	-1.05816	1.89178e-17	2.7685e-16	down
ESRRA	-1.0581	2.11625e-19	3.41739e-18	down
SLC25A43	-1.05809	1.71762e-06	8.87492e-06	down
SQLE	-1.05623	1.28072e-50	7.5919e-49	down
IL4R	-1.05478	5.04595e-22	9.42694e-21	down
TERT	-1.05342	7.85784e-10	6.11945e-09	down
TNFRSF12A	-1.05324	8.03463e-10	6.23983e-09	down
BCAS1	-1.05185	6.57052e-06	3.13977e-05	down
PDLIM1	-1.05036	2.60152e-55	1.74042e-53	down
HDAC11	-1.0496	8.18908e-13	8.41612e-12	down
TPCN1	-1.04896	2.8124e-39	1.12568e-37	down
HS6ST2	-1.04788	4.83226e-13	5.05875e-12	down
SLC25A20	-1.04656	6.3583e-20	1.0609e-18	down
AHSG	-1.04587	1.88381e-118	4.4857e-116	down
SLC7A11	-1.04555	5.93324e-25	1.30041e-23	down
EPHX2	-1.04529	1.98677e-18	3.05385e-17	down
IQSEC1	-1.0449	1.16713e-48	6.58517e-47	down
ACSL3	-1.04383	5.04955e-75	5.96143e-73	down
F7	-1.04232	1.01839e-20	1.78173e-19	down
SLC44A3	-1.04148	2.219e-09	1.63991e-08	down
CCDC86	-1.03989	3.91492e-82	5.44561e-80	down
SCLY	-1.03987	4.70542e-20	7.90746e-19	down
TAGLN2	-1.03977	2.43211e-53	1.53913e-51	down
HMOX1	-1.03881	2.95839e-19	4.71764e-18	down
MYLK	-1.03617	7.50029e-41	3.13606e-39	down
RAP1GAP	-1.03525	1.30176e-13	1.4199e-12	down
GRTP1	-1.03419	1.97845e-09	1.47377e-08	down
PNMA6A	-1.03415	0.00995663	0.0255443	down
NACC2	-1.03349	5.7042e-33	1.80086e-31	down
MAOA	-1.03152	1.12003e-06	5.94233e-06	down
ADAMTS1	-1.03039	4.1054e-28	1.03179e-26	down
GSN	-1.02951	5.34567e-67	4.84525e-65	down
PTPRJ	-1.02665	1.28997e-10	1.0852e-09	down
RDH10	-1.02458	1.88858e-12	1.8871e-11	down
CD68	-1.02381	1.32159e-06	6.94987e-06	down
SPSB1	-1.02311	1.61479e-13	1.75454e-12	down
IDI1	-1.02065	5.18934e-51	3.10234e-49	down
C1orf131	-1.01625	1.35727e-16	1.89923e-15	down
RIOX2	-1.01383	7.8494e-21	1.38191e-19	down
NR1H3	-1.01248	1.43504e-14	1.68147e-13	down
FAM89A	-1.01193	1.13231e-11	1.04314e-10	down
C1QTNF6	-1.01181	1.6797e-07	9.79988e-07	down
ACSL1	-1.01117	6.27104e-11	5.41166e-10	down
HYAL3	-1.01007	0.000433669	0.00149806	down
KIAA0930	-1.00978	5.54361e-19	8.74099e-18	down
PID1	-1.00794	6.18665e-15	7.56451e-14	down
KLHL29	-1.0045	0.00699402	0.0186273	down
FAM118A	-1.00356	4.43305e-15	5.50663e-14	down
GSR	-1.00327	1.78228e-44	8.57509e-43	down
ALDH3A2	-1.00276	5.04125e-53	3.16181e-51	down
EPPK1	-1.00236	1.01088e-12	1.02912e-11	down
CFAP69	-1.0017	0.00664154	0.0177897	down
CADM1	-1.00144	1.77168e-26	4.14148e-25	down
FAH	-1.00023	2.0778e-14	2.39893e-13	down
LRP2	-1.00003	2.7124e-06	1.35997e-05	down
FRAT2	-0.998284	3.84372e-36	1.38109e-34	down
SDC1	-0.994739	3.07324e-54	1.98967e-52	down
NUDT8	-0.993302	4.23766e-05	0.000178784	down
FAT4	-0.992046	3.04856e-14	3.47922e-13	down
EBF3	-0.990161	8.78363e-07	4.71177e-06	down
SIRPA	-0.989928	4.84932e-23	9.62262e-22	down
PECAM1	-0.988095	1.38548e-13	1.51005e-12	down
ACOT11	-0.987716	1.47655e-06	7.71439e-06	down
CAT	-0.986764	5.47656e-27	1.29529e-25	down
NOS1AP	-0.985472	0.0162866	0.0394434	down
A1CF	-0.985201	1.9913e-48	1.11015e-46	down
TMBIM1	-0.981318	1.53468e-55	1.04158e-53	down
KLF5	-0.98057	1.75606e-08	1.16262e-07	down
NUAK1	-0.977982	9.68308e-14	1.06696e-12	down
KCTD6	-0.97701	0.00165946	0.00509592	down
LRRC75B	-0.976227	0.00193037	0.00584605	down
ACAT2	-0.975005	6.00298e-44	2.83959e-42	down
PSAT1	-0.972025	5.62397e-58	3.97041e-56	down
CPPED1	-0.971963	1.59772e-14	1.85969e-13	down
ITPRIP	-0.971905	3.21849e-08	2.05343e-07	down
CEBPA	-0.971549	6.69422e-80	8.70806e-78	down
TRPV3	-0.971079	1.3212e-07	7.8055e-07	down
ADGRG5	-0.970811	0.0035392	0.0101103	down
FOXD2	-0.970766	0.000275727	0.000991729	down
CDC42EP4	-0.968973	2.15045e-15	2.74402e-14	down
NOP16	-0.96835	1.09612e-19	1.80743e-18	down
ETV4	-0.964844	1.60161e-42	7.25839e-41	down
DTX4	-0.962403	5.2899e-17	7.56031e-16	down
OMA1	-0.961469	1.08908e-06	5.79126e-06	down
CASZ1	-0.959679	4.74459e-05	0.000198501	down
KCNK5	-0.958727	6.01492e-06	2.88901e-05	down
CCDC170	-0.958354	0.00788619	0.0207517	down
DHCR24	-0.957907	1.10823e-121	2.83083e-119	down
GSDMB	-0.957712	4.85281e-06	2.36398e-05	down
CYB5A	-0.954444	2.62217e-20	4.47616e-19	down
MTRR	-0.953244	4.01961e-16	5.39365e-15	down
LRP8	-0.953115	4.00114e-21	7.18823e-20	down
PLCE1	-0.952378	7.19766e-17	1.01833e-15	down
DDI2	-0.95191	8.17239e-41	3.40694e-39	down
ENPP1	-0.950458	4.09721e-46	2.09315e-44	down
NPC1L1	-0.949032	5.37973e-15	6.64146e-14	down
SECTM1	-0.948974	0.0157769	0.038361	down
GOT2	-0.948222	4.86738e-46	2.45978e-44	down
NQO2	-0.947602	1.44531e-16	2.00842e-15	down
SUCLG1	-0.946994	5.36715e-23	1.05903e-21	down
NDUFAF4	-0.946134	7.07713e-14	7.91614e-13	down
NFKBIE	-0.945543	1.59831e-05	7.20857e-05	down
RAB3IL1	-0.945474	1.82204e-05	8.14179e-05	down
DOK4	-0.944866	2.30162e-32	7.0911e-31	down
GPC1	-0.944298	0.000273951	0.000986096	down
TAGLN	-0.940994	3.38228e-07	1.89843e-06	down
OGFR	-0.939682	1.15749e-33	3.78175e-32	down
G6PD	-0.937618	2.83672e-35	9.72026e-34	down
IMP4	-0.937004	2.85095e-26	6.59853e-25	down
CAV1	-0.933175	5.54586e-05	0.000228218	down
PTPRM	-0.932954	8.01938e-14	8.90627e-13	down
SLC5A6	-0.93192	1.74922e-33	5.62352e-32	down
GPER1	-0.931037	1.2793e-12	1.29488e-11	down
OSBPL6	-0.93085	9.29876e-09	6.35709e-08	down
EXOSC5	-0.930743	1.3848e-18	2.14262e-17	down
SFN	-0.928303	1.10192e-17	1.63645e-16	down
CDC42EP1	-0.927604	1.00383e-34	3.36584e-33	down
SUGCT	-0.927593	0.000567173	0.00191913	down
TRIP10	-0.927258	6.79086e-31	1.94704e-29	down
SOWAHC	-0.927252	7.99151e-10	6.20977e-09	down
FGFR3	-0.927176	4.08363e-91	6.37454e-89	down
MEP1A	-0.926618	8.68278e-37	3.13585e-35	down
NID2	-0.92612	0.0060475	0.0163745	down
TXN	-0.925633	8.46382e-60	6.29144e-58	down
BCL2L1	-0.925254	4.36007e-61	3.32906e-59	down
TTLL12	-0.924643	9.73593e-34	3.18835e-32	down
LIN7A	-0.922951	2.04795e-31	5.98164e-30	down
PPARG	-0.922624	1.76094e-13	1.90158e-12	down
COMT	-0.922483	6.9198e-20	1.15322e-18	down
CDX2	-0.922299	2.63499e-09	1.92908e-08	down
PAG1	-0.921884	0.00032908	0.0011622	down
WDYHV1	-0.921402	0.000595049	0.00200476	down
CEACAM1	-0.919741	5.40852e-09	3.80302e-08	down
RPSA	-0.919394	2.55321e-87	3.81596e-85	down
AOX1	-0.919057	0.00612717	0.0165755	down
DENND4A	-0.91894	4.20878e-18	6.38543e-17	down
TNFSF10	-0.918143	0.0147827	0.0361941	down
CD7	-0.915988	3.74966e-08	2.36335e-07	down
ACSS2	-0.91597	9.94826e-14	1.09532e-12	down
EGFL7	-0.915094	1.18947e-12	1.2067e-11	down
CSGALNACT1	-0.913447	0.0140408	0.0345888	down
EXOC3L4	-0.912349	7.01034e-10	5.50214e-09	down
PSD3	-0.912258	1.27442e-14	1.50457e-13	down
ADCY5	-0.911421	0.00706111	0.0187811	down
ONECUT1	-0.908854	2.73756e-09	1.99482e-08	down
ACOT13	-0.908492	5.83139e-12	5.55049e-11	down
NMRK1	-0.907127	0.0039073	0.011065	down
GALNT16	-0.906862	0.0204578	0.0481103	down
HECW1	-0.906856	0.00374904	0.0106598	down
ENPP2	-0.90523	2.10568e-24	4.47545e-23	down
PLIN4	-0.904664	1.8749e-06	9.60982e-06	down
SH2D3A	-0.903826	0.0124873	0.0311717	down
ASS1	-0.902447	6.73708e-19	1.05635e-17	down
LDHA	-0.902262	1.55213e-78	1.92973e-76	down
NGEF	-0.901189	1.76407e-23	3.5711e-22	down
LDLR	-0.900972	2.22641e-47	1.18931e-45	down
FAXDC2	-0.899319	1.3396e-09	1.01565e-08	down
SLC17A9	-0.898709	1.42834e-45	7.16671e-44	down
IL1R1	-0.898516	5.31011e-07	2.90392e-06	down
CMTM7	-0.897948	5.28087e-16	7.03898e-15	down
NR2C2AP	-0.897869	2.13881e-09	1.58649e-08	down
RGS14	-0.897448	6.67144e-05	0.000269951	down
PIM3	-0.897146	2.00842e-24	4.27519e-23	down
KYAT1	-0.89661	6.58802e-10	5.18226e-09	down
HSPE1	-0.895037	0.00218819	0.00655895	down
NQO1	-0.894877	3.38756e-87	5.00967e-85	down
DLX2	-0.894237	0.00217214	0.00651363	down
CRIP2	-0.893862	5.97455e-06	2.87476e-05	down
RASL12	-0.893002	0.00020063	0.000744295	down
NME1	-0.892251	1.05902e-11	9.78828e-11	down
ACSS3	-0.8909	3.14395e-22	5.94473e-21	down
HGD	-0.890182	7.73711e-40	3.15984e-38	down
2020-03-01	-0.88907	2.91112e-21	5.24337e-20	down
FAM13A	-0.886865	2.52074e-12	2.49746e-11	down
NR3C2	-0.886437	0.012676	0.0315921	down
ELP1	-0.885686	1.36781e-49	7.94066e-48	down
ICAM1	-0.883815	1.12889e-39	4.55741e-38	down
FTL	-0.883688	8.81592e-76	1.05859e-73	down
MDGA2	-0.883383	5.55834e-08	3.43249e-07	down
HOXA13	-0.88228	0.0195809	0.0462495	down
CFAP97	-0.881378	1.14896e-10	9.69477e-10	down
ETFB	-0.880109	2.21386e-11	1.9976e-10	down
SPATS2L	-0.879656	1.33077e-62	1.04447e-60	down
TRIM6	-0.879631	9.393e-08	5.66119e-07	down
CCDC163	-0.878182	0.000787869	0.00258616	down
ACOT7	-0.87413	1.05438e-21	1.93634e-20	down
TDRD6	-0.873391	0.00254733	0.00752154	down
FRAS1	-0.873084	1.70633e-46	8.81332e-45	down
AIFM1	-0.872323	1.11488e-31	3.29746e-30	down
GADD45A	-0.871726	9.24146e-10	7.12586e-09	down
METTL7B	-0.87116	1.45244e-08	9.69834e-08	down
CDIP1	-0.870752	0.00577864	0.0157212	down
LIAS	-0.868631	2.76306e-06	1.3839e-05	down
ZNF552	-0.868571	8.63456e-06	4.05031e-05	down
CAVIN1	-0.868143	1.7232e-24	3.70172e-23	down
ZNF415	-0.867977	0.0016991	0.0052142	down
GOT1	-0.867454	2.16354e-28	5.50644e-27	down
GUCY2C	-0.866435	0.0184234	0.0438102	down
PDSS1	-0.865294	4.77303e-06	2.32754e-05	down
RRS1	-0.865006	3.70812e-22	7.00208e-21	down
AMBP	-0.864872	2.62311e-106	5.26459e-104	down
ISOC1	-0.863683	2.2237e-26	5.17231e-25	down
RAP1GAP2	-0.863463	1.1896e-12	1.2067e-11	down
GNG4	-0.863269	0.00478139	0.0132676	down
FAM222A	-0.862848	7.81926e-09	5.39023e-08	down
MRPL23	-0.862246	9.87131e-10	7.5907e-09	down
PCOLCE2	-0.861139	3.11915e-15	3.93366e-14	down
MGST1	-0.860938	4.03668e-47	2.132e-45	down
MGST2	-0.860281	7.2709e-28	1.80475e-26	down
MAP10	-0.857247	0.0103111	0.026324	down
RMDN2	-0.856399	0.00344071	0.00984892	down
HDHD5	-0.853266	1.69306e-15	2.18219e-14	down
KAT14	-0.850423	3.50893e-15	4.39759e-14	down
EIF6	-0.85018	2.08165e-31	6.06745e-30	down
SORL1	-0.850159	3.13762e-22	5.94077e-21	down
EPS8L3	-0.850145	1.82109e-12	1.82356e-11	down
PACSIN3	-0.850123	1.96955e-21	3.58422e-20	down
PHETA1	-0.85004	1.9891e-22	3.78656e-21	down
RPS6KL1	-0.849232	0.00337024	0.00967085	down
SNORC	-0.84839	0.0137618	0.0339668	down
LMNA	-0.848054	7.26491e-39	2.81947e-37	down
MPST	-0.84787	4.23938e-37	1.55914e-35	down
UGT2B4	-0.846855	1.06501e-17	1.58332e-16	down
GSAP	-0.846347	0.00616923	0.0166612	down
OSBP2	-0.84487	2.96617e-05	0.000128537	down
PUS1	-0.844519	2.91283e-18	4.45777e-17	down
RRP9	-0.844026	2.42929e-18	3.72182e-17	down
RABGGTB	-0.843056	3.63606e-24	7.63573e-23	down
S1PR3	-0.843045	6.43056e-09	4.49244e-08	down
AKAP1	-0.842607	1.87783e-45	9.35518e-44	down
PROSER2	-0.842243	2.93045e-09	2.12764e-08	down
IGF1R	-0.83997	5.46764e-16	7.28104e-15	down
NAB2	-0.839739	7.07065e-10	5.54019e-09	down
DPH2	-0.839699	1.74596e-22	3.34638e-21	down
SOD2	-0.839568	2.01751e-29	5.3886e-28	down
NAT8L	-0.837061	1.75286e-20	3.02529e-19	down
DHX37	-0.836941	3.95967e-26	9.10464e-25	down
NHSL1	-0.836777	9.78321e-16	1.27855e-14	down
PLIN2	-0.836162	2.27996e-27	5.48478e-26	down
DUSP5	-0.836155	1.76545e-19	2.86407e-18	down
SLC39A14	-0.835953	1.48117e-63	1.20983e-61	down
L3HYPDH	-0.835647	4.48851e-08	2.80887e-07	down
SLC45A4	-0.835508	4.87163e-12	4.67816e-11	down
CHCHD4	-0.834333	4.84168e-12	4.65258e-11	down
ABLIM1	-0.834065	3.4577e-37	1.28172e-35	down
PRDX1	-0.832489	8.88637e-74	9.98757e-72	down
POLE4	-0.831657	1.65142e-08	1.09696e-07	down
AFAP1L1	-0.831466	0.00107531	0.0034272	down
DENND1A	-0.831448	1.54076e-20	2.66907e-19	down
SNCAIP	-0.830429	0.000293306	0.00104771	down
PARP12	-0.830193	5.30085e-10	4.19322e-09	down
MYDGF	-0.829746	3.21832e-39	1.28085e-37	down
MTHFD1L	-0.829268	5.36447e-19	8.47755e-18	down
IGDCC3	-0.829261	4.40142e-17	6.32265e-16	down
CEP126	-0.82906	0.00148034	0.00458495	down
CRADD	-0.829032	2.34465e-05	0.000103002	down
TRIM14	-0.828595	5.89726e-11	5.0985e-10	down
TIMM10	-0.827966	1.9699e-33	6.30413e-32	down
BOP1	-0.827656	1.89376e-24	4.04462e-23	down
IFFO2	-0.824723	3.27293e-09	2.36652e-08	down
C12orf66	-0.823222	4.592e-05	0.000192634	down
DDAH1	-0.821767	2.47763e-23	4.9726e-22	down
ZNF787	-0.820777	1.41269e-35	4.90046e-34	down
FXN	-0.820129	8.42965e-05	0.000334921	down
GPT2	-0.818411	2.43754e-24	5.15738e-23	down
HCN2	-0.818168	0.00299247	0.0086952	down
ENO1	-0.81717	3.6018e-94	6.02401e-92	down
HSPA9	-0.816696	1.23716e-71	1.28327e-69	down
SEPHS2	-0.816473	7.28664e-50	4.24772e-48	down
RCC1	-0.814605	4.82964e-41	2.03759e-39	down
FHL2	-0.814022	0.00999531	0.0256389	down
PANX2	-0.813736	6.35676e-06	3.04487e-05	down
CEBPB	-0.813427	1.12865e-14	1.3449e-13	down
TMCC3	-0.813295	0.0150718	0.0368058	down
MON1A	-0.812522	0.00031468	0.00111565	down
CTU1	-0.811599	0.00304857	0.00883627	down
TRIM2	-0.811206	1.64608e-09	1.23403e-08	down
IER5L	-0.811032	3.52148e-10	2.84492e-09	down
GPATCH4	-0.809603	7.64221e-28	1.89357e-26	down
C20orf27	-0.808756	1.89434e-24	4.04462e-23	down
FLRT2	-0.80875	1.12669e-06	5.97318e-06	down
PLCXD2	-0.807834	0.0097652	0.025122	down
RIPOR3	-0.807083	0.0177439	0.042417	down
PRELID1	-0.80655	8.97364e-35	3.02328e-33	down
CCDC58	-0.806282	3.03959e-11	2.71131e-10	down
AC010422.3	-0.805756	8.81922e-49	4.99601e-47	down
RPS29	-0.805452	7.64334e-08	4.65459e-07	down
CHKA	-0.803941	1.77736e-48	9.98805e-47	down
EIF5AL1	-0.803765	4.97921e-17	7.13077e-16	down
ASNS	-0.802786	9.63169e-14	1.06213e-12	down
PRKCA	-0.802714	4.06908e-12	3.94252e-11	down
THNSL1	-0.802172	6.6094e-07	3.58377e-06	down
ICAM3	-0.801701	1.29593e-08	8.69047e-08	down
PLPP3	-0.801275	5.85303e-09	4.10325e-08	down
PAQR9	-0.80012	2.18582e-15	2.78662e-14	down
ACVR1B	-0.798645	2.85465e-22	5.41228e-21	down
WDR4	-0.79812	3.52459e-09	2.54586e-08	down
FRY	-0.797683	1.55544e-14	1.81499e-13	down
LSM10	-0.797301	4.91552e-08	3.06109e-07	down
KRT18	-0.797148	2.6478e-50	1.56298e-48	down
SLC25A1	-0.796844	1.74495e-29	4.67841e-28	down
DNAJC25	-0.795729	2.63916e-06	1.32657e-05	down
MGAT5	-0.795083	8.03251e-26	1.82603e-24	down
KALRN	-0.793706	2.32165e-07	1.3313e-06	down
TMEM120A	-0.793604	1.78028e-05	7.96281e-05	down
SORBS2	-0.793329	0.00318547	0.00919891	down
HSD17B4	-0.792966	1.08758e-38	4.1747e-37	down
MRPL24	-0.792717	5.91115e-21	1.05121e-19	down
TRIP6	-0.792476	1.82041e-19	2.94642e-18	down
PDE4DIP	-0.790203	3.47889e-15	4.36384e-14	down
GHR	-0.790177	3.64052e-07	2.0304e-06	down
SREBF1	-0.789393	1.04966e-43	4.86687e-42	down
RITA1	-0.787678	8.44812e-12	7.90197e-11	down
PSMD13	-0.786141	2.68408e-35	9.21971e-34	down
TLE3	-0.785511	1.7391e-15	2.23742e-14	down
SEMA3F	-0.784614	0.000125421	0.00048222	down
ECSIT	-0.783667	8.57916e-15	1.03458e-13	down
PKHD1	-0.782446	0.000197225	0.000732632	down
RBKS	-0.782084	0.00695015	0.0185351	down
RRP12	-0.781783	2.23736e-30	6.33723e-29	down
TRMT61A	-0.781299	2.56909e-10	2.09966e-09	down
SFXN4	-0.781233	4.65142e-09	3.29873e-08	down
CBWD6	-0.781014	0.0128334	0.031922	down
SLC29A1	-0.780299	1.74622e-20	3.01755e-19	down
SMIM20	-0.779173	1.03943e-20	1.81628e-19	down
NR2F1	-0.777988	1.84909e-17	2.71167e-16	down
RPS19	-0.777149	4.83305e-71	4.81556e-69	down
PMAIP1	-0.776919	0.020374	0.0479534	down
GLRX5	-0.776557	2.03847e-19	3.29556e-18	down
NOB1	-0.776478	2.57765e-25	5.72092e-24	down
DKC1	-0.77645	2.18117e-32	6.74962e-31	down
ANKRD39	-0.775962	3.95351e-05	0.000167601	down
KIFC3	-0.775418	1.00774e-22	1.96091e-21	down
LCAT	-0.7751	4.33017e-10	3.46438e-09	down
SOBP	-0.775079	1.78798e-06	9.19447e-06	down
OSBPL10	-0.774236	9.68892e-11	8.21978e-10	down
EARS2	-0.772956	7.30101e-13	7.55872e-12	down
CMTM8	-0.772273	6.9041e-13	7.16894e-12	down
NPC1	-0.772164	1.6734e-22	3.21169e-21	down
HTATIP2	-0.772068	4.11553e-26	9.43216e-25	down
CALD1	-0.77165	5.85959e-55	3.8468e-53	down
RPS2	-0.771011	2.80136e-71	2.81116e-69	down
ARRB1	-0.77028	2.05314e-10	1.69674e-09	down
SLC3A2	-0.769842	1.43517e-54	9.3346e-53	down
DUS2	-0.76939	2.83825e-07	1.6111e-06	down
CLIP2	-0.76875	1.06371e-15	1.38886e-14	down
RPL10	-0.76704	1.42193e-60	1.07402e-58	down
TRIB1	-0.765853	2.68919e-09	1.96364e-08	down
POR	-0.765801	5.01017e-33	1.59248e-31	down
NUDT7	-0.764764	0.0196827	0.0464822	down
TSEN2	-0.764061	2.61282e-06	1.31427e-05	down
GNB1L	-0.763266	0.000996655	0.00319681	down
OTULINL	-0.763054	0.00102764	0.0032857	down
LAPTM4B	-0.762456	4.17981e-31	1.20579e-29	down
SIGMAR1	-0.762205	1.28877e-19	2.1078e-18	down
LRRC28	-0.761946	4.45936e-08	2.79187e-07	down
AARS	-0.761336	1.00368e-62	7.92171e-61	down
CTSH	-0.760502	8.03199e-07	4.32509e-06	down
FOXQ1	-0.760159	0.000625006	0.00209413	down
TWNK	-0.759732	9.14341e-13	9.35585e-12	down
RPF2	-0.758909	3.05651e-13	3.25064e-12	down
DDX54	-0.758746	1.58484e-28	4.07047e-27	down
PRMT3	-0.75873	6.18084e-08	3.79522e-07	down
ERG28	-0.758239	4.82571e-17	6.92502e-16	down
SMYD5	-0.758118	3.4768e-17	5.01494e-16	down
CARM1	-0.757969	1.94852e-15	2.49769e-14	down
DDX21	-0.757901	3.59818e-48	1.97464e-46	down
RPL12	-0.754965	2.99318e-48	1.65556e-46	down
PER2	-0.754779	1.50296e-11	1.37111e-10	down
EIF5A	-0.754653	3.55811e-50	2.08283e-48	down
MIPEP	-0.754451	8.2997e-05	0.000330132	down
FAM83G	-0.754015	3.17801e-16	4.31797e-15	down
TRNP1	-0.753749	9.21213e-20	1.528e-18	down
ADM2	-0.753629	7.99236e-05	0.000318267	down
PPP1R14B	-0.753584	2.29835e-16	3.14713e-15	down
SHMT2	-0.753276	3.98366e-51	2.41235e-49	down
PYROXD1	-0.753233	0.00076293	0.00251429	down
NFATC2	-0.75304	6.38084e-05	0.000259313	down
STAT5B	-0.751947	2.54836e-10	2.08758e-09	down
TPRG1L	-0.751109	1.83528e-14	2.12563e-13	down
IMPA2	-0.750847	1.00297e-24	2.18461e-23	down
CCDC50	-0.750795	7.05003e-36	2.48859e-34	down
ACO1	-0.750737	2.6272e-17	3.82086e-16	down
TMEM53	-0.750426	0.000275977	0.000992371	down
WDR3	-0.749752	9.78836e-13	9.98669e-12	down
IPO5	-0.749377	4.65257e-42	2.08165e-40	down
FRK	-0.748932	9.47641e-26	2.14387e-24	down
CLEC2L	-0.748395	1.45722e-07	8.55514e-07	down
PTPRG	-0.748367	2.72572e-07	1.5516e-06	down
HMGCR	-0.748281	4.07625e-36	1.4609e-34	down
DNPH1	-0.74819	7.05814e-09	4.90162e-08	down
BLOC1S1-RDH5	-0.748168	0.0147331	0.0360853	down
ZIC5	-0.747364	0.00326786	0.00941168	down
TUBE1	-0.746411	1.67809e-05	7.54418e-05	down
RSU1	-0.745981	9.93801e-10	7.6378e-09	down
LIMD1	-0.745021	9.64963e-15	1.15377e-13	down
RABEPK	-0.744074	3.23911e-12	3.17781e-11	down
RAB31	-0.743942	9.26245e-13	9.46387e-12	down
FKBP11	-0.743329	3.20811e-15	4.04222e-14	down
TNFRSF19	-0.742534	2.76475e-05	0.000120366	down
P3H2	-0.742436	4.98082e-09	3.5199e-08	down
TSPAN4	-0.741852	1.31931e-12	1.33154e-11	down
GRPEL1	-0.741225	1.57171e-22	3.02893e-21	down
ZMAT5	-0.740884	0.00144374	0.00448048	down
DUSP7	-0.740286	0.00165611	0.00508672	down
WNK2	-0.738936	1.73856e-09	1.30128e-08	down
DNMBP	-0.737899	5.79903e-08	3.5717e-07	down
RPS5	-0.737835	4.92385e-53	3.10202e-51	down
SAPCD2	-0.737294	5.01865e-37	1.83612e-35	down
MYLIP	-0.736698	0.000156579	0.000592133	down
RPS3	-0.736621	1.03825e-66	9.23186e-65	down
TMEM177	-0.736389	2.06298e-09	1.53105e-08	down
YARS	-0.736379	1.80228e-29	4.82291e-28	down
FBXL4	-0.736027	4.64638e-09	3.29682e-08	down
FZD7	-0.735999	5.27859e-09	3.7191e-08	down
SLC25A5	-0.734688	8.46247e-46	4.26126e-44	down
LRRC20	-0.734673	1.07024e-08	7.2427e-08	down
TBRG4	-0.734042	9.91275e-18	1.47526e-16	down
ID1	-0.733987	8.55238e-58	6.00762e-56	down
SORD	-0.733816	2.56755e-16	3.50549e-15	down
PPIF	-0.731622	1.02801e-23	2.12077e-22	down
USP2	-0.730763	0.0200569	0.0473102	down
NDUFAF2	-0.72968	1.25068e-05	5.729e-05	down
PPP6R2	-0.729524	8.23354e-34	2.70264e-32	down
KRT8	-0.729472	6.42542e-12	6.09114e-11	down
FOXJ1	-0.72914	0.00207925	0.0062672	down
TOLLIP	-0.729117	1.21307e-20	2.11183e-19	down
PSMB7	-0.728412	1.10099e-44	5.33372e-43	down
EMG1	-0.72639	1.05731e-19	1.7496e-18	down
LSM4	-0.725643	1.66193e-33	5.35515e-32	down
PDE8A	-0.725373	6.30497e-16	8.34859e-15	down
IGSF3	-0.724789	2.87656e-12	2.83598e-11	down
SLC19A2	-0.724681	4.31612e-08	2.70581e-07	down
MBNL3	-0.724358	3.78281e-28	9.52413e-27	down
ZNF444	-0.724293	9.10338e-19	1.42104e-17	down
KCNC4	-0.723795	0.00139352	0.00433607	down
TMEM169	-0.723789	7.62761e-05	0.000305126	down
CXADR	-0.723307	2.52457e-13	2.69511e-12	down
RMND1	-0.722911	1.02881e-07	6.16105e-07	down
DCTPP1	-0.722487	2.83273e-08	1.82304e-07	down
NEK6	-0.722294	4.94501e-20	8.30017e-19	down
CRLS1	-0.722185	1.79218e-18	2.75776e-17	down
MID1IP1	-0.722	7.80804e-24	1.61792e-22	down
ERP27	-0.721998	0.00102444	0.00327714	down
DUSP3	-0.721788	5.03226e-23	9.9575e-22	down
RTKN	-0.721516	8.23155e-10	6.3857e-09	down
NLE1	-0.720729	8.37454e-17	1.1789e-15	down
SLC43A1	-0.719617	1.05004e-39	4.25131e-38	down
LYRM1	-0.719531	1.745e-06	8.99652e-06	down
METRN	-0.7188	0.00962926	0.0248314	down
LLGL2	-0.718214	5.49312e-16	7.30804e-15	down
TIMM9	-0.717329	2.16661e-06	1.09966e-05	down
PPID	-0.716392	1.72594e-13	1.86521e-12	down
RFK	-0.716245	5.18184e-11	4.50772e-10	down
TENM1	-0.715868	0.00118144	0.00373073	down
AKNA	-0.715542	6.60119e-05	0.000267263	down
PUSL1	-0.715495	1.67281e-06	8.66566e-06	down
RTN4RL2	-0.714122	0.00495947	0.013713	down
PEBP1	-0.713932	3.27772e-45	1.61574e-43	down
SATB2	-0.713546	0.000200183	0.000742835	down
RPLP0	-0.712877	1.32146e-67	1.20553e-65	down
GOLIM4	-0.712635	1.21839e-28	3.15234e-27	down
IGFBP4	-0.711979	1.00572e-07	6.03048e-07	down
PCYT2	-0.711689	4.44808e-36	1.58607e-34	down
ABTB2	-0.711141	0.00147603	0.0045736	down
RPL18A	-0.710848	1.06968e-14	1.2768e-13	down
NINJ2	-0.71066	0.00113756	0.00360676	down
HSP90AB1	-0.710592	2.11142e-71	2.14952e-69	down
XYLB	-0.710514	4.78923e-11	4.18954e-10	down
LGR5	-0.710117	1.73998e-06	8.9772e-06	down
C1QBP	-0.709867	5.35468e-32	1.60401e-30	down
RPLP1	-0.709673	8.09103e-67	7.24019e-65	down
AHSA1	-0.709458	2.86405e-24	6.03254e-23	down
RAB32	-0.709421	5.14254e-11	4.4763e-10	down
LHPP	-0.707866	6.86951e-08	4.1979e-07	down
STEAP1B	-0.707777	0.000928093	0.00300018	down
TXNRD1	-0.707526	6.80256e-54	4.36389e-52	down
AIFM2	-0.707352	1.95535e-15	2.50417e-14	down
CPNE2	-0.706689	1.63869e-06	8.50144e-06	down
EEF2KMT	-0.706295	0.000296138	0.0010557	down
NTPCR	-0.706249	7.69102e-09	5.30964e-08	down
MRPL14	-0.705958	7.54886e-14	8.4103e-13	down
SC5D	-0.7056	2.75093e-14	3.14466e-13	down
FPGT	-0.705317	0.00984756	0.0253107	down
MRPL18	-0.705219	6.60958e-16	8.71906e-15	down
TKT	-0.704607	2.80906e-28	7.11072e-27	down
NDUFB9	-0.704237	4.10775e-21	7.36093e-20	down
RASSF3	-0.704021	1.3113e-21	2.40503e-20	down
HK2	-0.703417	5.44687e-12	5.20919e-11	down
SLC6A9	-0.703278	1.18222e-05	5.44023e-05	down
RFFL	-0.702881	2.97465e-10	2.42407e-09	down
STARD4	-0.701565	3.91391e-15	4.87901e-14	down
SH2D4A	-0.701241	5.43636e-11	4.71745e-10	down
RPL38	-0.701002	8.06544e-32	2.39559e-30	down
SH3RF2	-0.700756	1.35269e-06	7.09898e-06	down
ATIC	-0.699771	6.02859e-30	1.67053e-28	down
ADRM1	-0.699196	2.47394e-38	9.41909e-37	down
PC	-0.699127	5.81738e-37	2.12281e-35	down
IPMK	-0.699014	1.3764e-05	6.26201e-05	down
PAQR7	-0.698663	1.74677e-06	9.00234e-06	down
COA4	-0.698081	1.75746e-12	1.76235e-11	down
RPS16	-0.697678	5.96589e-61	4.53053e-59	down
ELMO1	-0.69706	0.00679889	0.0181661	down
GLA	-0.696753	2.0707e-12	2.06028e-11	down
GALK1	-0.6965	1.66522e-07	9.71942e-07	down
PTMS	-0.696219	0.000132782	0.000507744	down
TFAP4	-0.695538	1.97048e-06	1.00557e-05	down
EDEM2	-0.695455	1.10745e-08	7.4765e-08	down
ZMIZ1	-0.694695	3.52869e-26	8.14032e-25	down
ARV1	-0.693993	0.00396696	0.0112136	down
CCDC88C	-0.693734	8.24525e-11	7.03752e-10	down
TCOF1	-0.69335	6.50066e-33	2.04313e-31	down
PRKAB2	-0.693259	2.43629e-11	2.18986e-10	down
ST3GAL6	-0.693253	8.30344e-10	6.43792e-09	down
USP18	-0.692733	2.71522e-05	0.000118393	down
HSP90AA1	-0.691168	8.13347e-59	5.95142e-57	down
NTN1	-0.69097	0.00122714	0.00386637	down
PUM3	-0.690827	1.42579e-10	1.19445e-09	down
C16orf91	-0.689516	0.000201012	0.000745516	down
SHLD2	-0.689381	5.09238e-12	4.88347e-11	down
POP1	-0.688741	5.80049e-07	3.1635e-06	down
KLB	-0.68812	1.07323e-26	2.51715e-25	down
NUDT18	-0.687732	0.00929087	0.0240382	down
COQ8A	-0.686989	3.18147e-14	3.62502e-13	down
UGDH	-0.686524	7.84934e-28	1.94147e-26	down
WDR74	-0.684124	2.04273e-16	2.81632e-15	down
ACOT1	-0.684051	0.0124927	0.0311795	down
PDLIM5	-0.683531	3.63812e-30	1.01614e-28	down
HNF1A	-0.683461	8.70571e-15	1.04804e-13	down
ABCD3	-0.68338	1.48821e-20	2.58122e-19	down
PES1	-0.683039	1.49565e-22	2.89028e-21	down
SPR	-0.682129	8.09216e-13	8.3287e-12	down
PWWP2B	-0.6816	0.00074561	0.00246326	down
PSMD3	-0.679973	3.20796e-30	9.01372e-29	down
RPS24	-0.679354	5.38021e-49	3.06019e-47	down
KCTD3	-0.678752	5.43505e-29	1.43528e-27	down
BCAR3	-0.678717	3.98872e-05	0.00016894	down
ZNF330	-0.678709	7.89397e-10	6.14418e-09	down
PABPC1	-0.678652	5.03317e-49	2.87443e-47	down
DAB2IP	-0.678445	2.37033e-11	2.1333e-10	down
HMBS	-0.678315	1.17332e-11	1.07809e-10	down
XPNPEP3	-0.677901	2.58875e-06	1.30449e-05	down
LYAR	-0.677615	1.23656e-17	1.83061e-16	down
AMD1	-0.677608	1.19783e-27	2.92158e-26	down
ANXA2	-0.677495	2.99668e-39	1.19603e-37	down
ZDHHC23	-0.676926	1.93884e-07	1.11971e-06	down
RPL7	-0.676163	8.75891e-29	2.29151e-27	down
ME2	-0.675905	8.20728e-13	8.42866e-12	down
GNL3L	-0.675643	9.38761e-12	8.74579e-11	down
CARD18	-0.675543	0.00383326	0.0108751	down
TBL1X	-0.675267	3.57946e-13	3.78673e-12	down
JUP	-0.675018	2.1737e-14	2.50314e-13	down
GALM	-0.67472	2.81993e-08	1.8161e-07	down
NT5DC3	-0.674616	2.88625e-07	1.63702e-06	down
CTH	-0.673904	0.00293775	0.0085592	down
DNPEP	-0.673713	3.94784e-12	3.83828e-11	down
EPHA5	-0.671925	1.72109e-06	8.88955e-06	down
DESI1	-0.671603	3.23092e-13	3.42575e-12	down
POPDC3	-0.671298	0.0031363	0.00907182	down
INO80C	-0.670856	0.000570144	0.00192725	down
VDAC1	-0.67031	3.48357e-30	9.74914e-29	down
TPRN	-0.66959	3.04959e-08	1.95099e-07	down
CX3CL1	-0.669524	1.21036e-14	1.43376e-13	down
ACLY	-0.669477	2.06284e-47	1.11038e-45	down
CSRP1	-0.669306	5.13798e-19	8.12877e-18	down
CADPS2	-0.669055	4.19912e-07	2.32258e-06	down
MALT1	-0.668864	1.5686e-08	1.04392e-07	down
MRPL52	-0.668524	6.52511e-16	8.62383e-15	down
DAP3	-0.668275	1.03298e-24	2.2465e-23	down
FADS2	-0.66827	3.86395e-58	2.78383e-56	down
FRRS1	-0.6682	1.07823e-08	7.2897e-08	down
PHGDH	-0.6681	1.45085e-33	4.71828e-32	down
FSTL3	-0.667214	5.29103e-08	3.27895e-07	down
TACO1	-0.666236	3.78063e-07	2.10603e-06	down
CLDN1	-0.665384	3.05612e-49	1.75965e-47	down
SLC26A1	-0.66533	9.02616e-12	8.42022e-11	down
RFT1	-0.664568	3.70305e-05	0.000157972	down
RPS23	-0.664149	2.27909e-34	7.5695e-33	down
GPHN	-0.663411	0.00851925	0.0222467	down
NPM3	-0.663408	3.01737e-12	2.96441e-11	down
TOMM40	-0.662624	1.30204e-24	2.81855e-23	down
GMPPA	-0.662163	1.40783e-18	2.17587e-17	down
CCDC167	-0.661753	1.54305e-07	9.03263e-07	down
TOP1MT	-0.661674	1.9529e-06	9.97321e-06	down
MYO1B	-0.661576	1.19126e-31	3.51598e-30	down
YJU2	-0.661455	2.76293e-08	1.7863e-07	down
ODC1	-0.661333	3.66369e-32	1.10929e-30	down
TRMT1	-0.661074	5.84267e-15	7.16888e-14	down
ADM5	-0.660712	0.00133069	0.00415627	down
TOMM40L	-0.660301	1.86418e-05	8.3116e-05	down
CYCS	-0.660225	2.61732e-32	8.01104e-31	down
PNO1	-0.65991	9.74866e-10	7.50049e-09	down
LAMC1	-0.659764	6.44039e-33	2.02872e-31	down
PSMA7	-0.659215	2.98859e-42	1.34573e-40	down
EPAS1	-0.657406	9.66409e-36	3.37738e-34	down
ABCC6	-0.65739	3.7417e-05	0.000159294	down
RPLP2	-0.657156	2.19369e-41	9.39609e-40	down
IFRD2	-0.656623	1.61875e-14	1.8826e-13	down
TSKU	-0.655492	1.03156e-10	8.71988e-10	down
UAP1	-0.655157	2.22212e-07	1.27631e-06	down
POMP	-0.655133	1.15264e-22	2.23667e-21	down
SHC1	-0.654551	1.52081e-22	2.93487e-21	down
RPS21	-0.653938	5.62321e-36	1.99496e-34	down
NGDN	-0.653754	4.16585e-09	2.98146e-08	down
TMPRSS9	-0.653591	0.000838119	0.0027364	down
COQ3	-0.653056	1.15513e-05	5.3243e-05	down
CKS1B	-0.652031	5.39689e-22	1.00425e-20	down
TFB2M	-0.651763	1.25559e-09	9.55053e-09	down
RPL14	-0.651414	7.20555e-37	2.61578e-35	down
FAT1	-0.650993	7.77805e-19	1.2155e-17	down
MDH2	-0.650127	1.82279e-24	3.90372e-23	down
SMPDL3A	-0.650019	2.74034e-07	1.5593e-06	down
PSMA5	-0.649681	3.59843e-21	6.47302e-20	down
TTC38	-0.649417	2.4905e-14	2.85625e-13	down
PSMD1	-0.649038	8.89308e-33	2.7826e-31	down
RPL27	-0.648976	1.0031e-43	4.6664e-42	down
GYG2	-0.647781	1.28806e-14	1.51812e-13	down
PA2G4	-0.647732	2.87476e-28	7.26394e-27	down
PSMB6	-0.647394	1.0728e-29	2.91524e-28	down
MATN3	-0.647271	4.07387e-24	8.54237e-23	down
UQCC3	-0.647096	1.79639e-07	1.0433e-06	down
NADK2	-0.646658	1.47381e-24	3.17569e-23	down
FOXA3	-0.64579	5.00736e-08	3.11414e-07	down
ALDH18A1	-0.645477	3.42393e-32	1.03894e-30	down
WASF3	-0.644885	3.64342e-06	1.79854e-05	down
IER5	-0.643572	0.000365804	0.00128127	down
TIMM44	-0.642516	1.26592e-16	1.77494e-15	down
DOCK8	-0.641883	5.51236e-06	2.66678e-05	down
PDZD8	-0.641753	6.92642e-16	9.12846e-15	down
LPAR6	-0.641662	5.32988e-05	0.000220364	down
SLC16A10	-0.641085	2.40619e-05	0.000105507	down
HEG1	-0.640973	3.15683e-29	8.3838e-28	down
ANK3	-0.640898	6.07956e-05	0.000248414	down
FAM207A	-0.640833	4.01848e-07	2.2288e-06	down
ID4	-0.63998	7.29057e-15	8.85265e-14	down
HSPB8	-0.639651	0.000149339	0.00056678	down
LIMCH1	-0.6395	3.03159e-08	1.94124e-07	down
C16orf70	-0.639172	8.30671e-06	3.9122e-05	down
PHYH	-0.638789	7.06585e-09	4.90455e-08	down
ALDH5A1	-0.638611	3.94729e-05	0.00016759	down
PREB	-0.637128	7.47227e-16	9.82019e-15	down
TXNDC5	-0.636977	0.00409496	0.0115429	down
MAP3K21	-0.636964	0.000195124	0.000725404	down
FKBP4	-0.636267	2.12518e-29	5.6654e-28	down
SMARCD2	-0.636073	5.53514e-13	5.77307e-12	down
PCSK5	-0.635664	6.86637e-05	0.000276961	down
TMEM241	-0.635612	0.00368868	0.010501	down
DPP9	-0.635568	8.07602e-25	1.76454e-23	down
MRTO4	-0.635077	6.12911e-18	9.22913e-17	down
FBLN1	-0.635007	1.58203e-25	3.54481e-24	down
APRT	-0.634911	3.85435e-17	5.54813e-16	down
SREBF2	-0.634787	3.79649e-31	1.09747e-29	down
PFKFB4	-0.634757	0.00400864	0.0113224	down
MRPS23	-0.633837	1.45751e-11	1.33051e-10	down
RAB5IF	-0.63347	3.26316e-07	1.83738e-06	down
RPS4X	-0.631884	1.83206e-41	7.96863e-40	down
YIF1A	-0.631611	4.15433e-36	1.4851e-34	down
AHNAK	-0.631576	4.90319e-45	2.40017e-43	down
KLHL5	-0.631465	1.44201e-16	2.00582e-15	down
WDR77	-0.631291	2.55676e-12	2.52957e-11	down
BEX1	-0.631149	6.396e-05	0.000259854	down
HDDC3	-0.631031	0.000185826	0.000693591	down
ERLIN1	-0.630615	2.72468e-22	5.17284e-21	down
SLC1A5	-0.630393	2.371e-26	5.50581e-25	down
RPL13A	-0.629284	2.88225e-34	9.5277e-33	down
CCDC9B	-0.628448	0.00105618	0.00337042	down
PGD	-0.627874	1.28486e-37	4.81361e-36	down
NHP2	-0.627794	3.08519e-10	2.50687e-09	down
NFS1	-0.627542	9.3991e-07	5.02657e-06	down
COA7	-0.627248	7.83222e-11	6.69719e-10	down
PLK2	-0.627039	5.59723e-06	2.7069e-05	down
GTDC1	-0.626938	0.0050258	0.01388	down
HES4	-0.626709	0.000173546	0.000650694	down
COASY	-0.624588	1.77462e-18	2.73374e-17	down
RPGR	-0.624446	0.00339994	0.00974415	down
PSMC2	-0.623565	1.28507e-32	3.99425e-31	down
SLC19A1	-0.623116	4.52561e-14	5.11507e-13	down
PSMD2	-0.622926	8.46186e-40	3.44582e-38	down
PDIA4	-0.622819	2.21222e-40	9.16798e-39	down
CLCN5	-0.621361	1.42312e-17	2.09794e-16	down
B9D1	-0.620725	3.21415e-05	0.000138514	down
REXO2	-0.620273	4.3276e-05	0.000182249	down
GLUL	-0.620035	9.464e-29	2.46679e-27	down
GEMIN5	-0.619944	7.70945e-13	7.95228e-12	down
ARL2	-0.619477	0.0211269	0.0495429	down
CPOX	-0.6191	4.43798e-12	4.27635e-11	down
GREB1	-0.618937	2.66283e-10	2.17374e-09	down
CHST9	-0.618628	1.85141e-10	1.53908e-09	down
MUTYH	-0.618417	1.7771e-05	7.95362e-05	down
ARHGAP32	-0.61798	0.00516855	0.014235	down
KSR1	-0.617893	1.06883e-05	4.94925e-05	down
HOXC10	-0.617857	1.44768e-07	8.50272e-07	down
STEAP2	-0.617408	0.0043391	0.0121434	down
LGMN	-0.617064	5.22884e-05	0.00021676	down
RAPGEF1	-0.617005	1.70277e-15	2.19268e-14	down
MRPL32	-0.616854	1.57192e-09	1.18159e-08	down
RPL32	-0.616483	2.79607e-40	1.15535e-38	down
RPL19	-0.616099	7.20896e-40	2.95273e-38	down
EIF3B	-0.616084	1.93609e-34	6.44552e-33	down
POLD2	-0.616031	4.35529e-18	6.59347e-17	down
EIF3D	-0.615973	1.07822e-24	2.34126e-23	down
ISOC2	-0.615972	5.86374e-11	5.07264e-10	down
MRPS15	-0.615503	6.32881e-14	7.09038e-13	down
ECI2	-0.615479	3.05362e-08	1.95267e-07	down
PSMD11	-0.615367	6.75788e-31	1.94154e-29	down
CXXC5	-0.614228	9.43955e-19	1.47188e-17	down
ZNF587B	-0.613529	4.98087e-06	2.42468e-05	down
TIAM2	-0.613525	0.005595	0.0152897	down
SLC25A45	-0.612952	0.0110558	0.0279607	down
UBL7	-0.612374	1.64904e-08	1.0959e-07	down
ARHGEF10L	-0.611867	3.56219e-15	4.45639e-14	down
CENPV	-0.611826	1.53344e-11	1.3971e-10	down
ADGRL1	-0.611784	1.35746e-07	8.00295e-07	down
C19orf66	-0.611388	0.00259828	0.00765588	down
LMO7	-0.611116	4.6114e-21	8.24244e-20	down
DLC1	-0.611053	0.0111864	0.0282455	down
SLC35D1	-0.610762	1.24706e-14	1.47599e-13	down
TMC7	-0.610707	0.000225011	0.000825804	down
C9orf3	-0.610507	5.35554e-06	2.59448e-05	down
PSMB4	-0.610419	8.95665e-31	2.55237e-29	down
MYBBP1A	-0.610236	6.54933e-22	1.21387e-20	down
CNN3	-0.609817	7.39079e-24	1.53373e-22	down
CENPX	-0.609504	3.37458e-12	3.30379e-11	down
DOHH	-0.609358	8.65657e-10	6.68956e-09	down
PHB	-0.609261	6.40027e-26	1.4597e-24	down
SPATA13	-0.608945	0.000212885	0.000786022	down
BRI3	-0.608663	0.00034037	0.00119816	down
LRRC59	-0.607616	4.12242e-26	9.43256e-25	down
HSPG2	-0.607318	2.5416e-26	5.89223e-25	down
MIIP	-0.606772	1.65963e-07	9.69489e-07	down
CCT5	-0.606598	3.2203e-34	1.05953e-32	down
NOC2L	-0.60602	5.54585e-25	1.2174e-23	down
CYSTM1	-0.605658	7.27136e-07	3.93208e-06	down
GTF3A	-0.605565	2.96302e-12	2.91305e-11	down
SPTBN1	-0.605331	1.98698e-47	1.07366e-45	down
NLN	-0.605324	1.50473e-15	1.95018e-14	down
ABCA5	-0.605238	0.000604796	0.00203467	down
LRP4	-0.604981	6.00949e-06	2.88739e-05	down
LIPA	-0.604728	1.37809e-09	1.04315e-08	down
OSBPL3	-0.604496	4.0537e-17	5.82912e-16	down
NOA1	-0.603657	1.92294e-06	9.83094e-06	down
MRPL58	-0.603641	5.28272e-06	2.56009e-05	down
SLC6A6	-0.603313	6.84289e-21	1.21384e-19	down
CMC1	-0.603139	9.43084e-08	5.68156e-07	down
SERINC5	-0.602562	2.45651e-08	1.59628e-07	down
SDHAF1	-0.602296	0.0002418	0.000882121	down
GRHL1	-0.601513	0.000115818	0.000447996	down
RPS15	-0.600959	1.07303e-38	4.13016e-37	down
SSSCA1	-0.60067	1.29885e-08	8.7059e-08	down
MYRF	-0.600647	6.06746e-23	1.19386e-21	down
MRPL36	-0.600478	0.000658748	0.00219985	down
ELOVL6	-0.600416	1.33188e-10	1.11711e-09	down
CCT3	-0.600337	6.506e-42	2.89249e-40	down
CASP4	-0.600229	3.59626e-10	2.89867e-09	down
SLC12A2	-0.600138	3.22093e-11	2.86035e-10	down
AC015802.6	-0.599823	2.01771e-11	1.82529e-10	down
CCDC85C	-0.598468	4.26607e-10	3.41699e-09	down
ETFA	-0.5978	6.81796e-24	1.41695e-22	down
RASAL2	-0.597501	5.22737e-08	3.24092e-07	down
LRP3	-0.597207	3.03158e-23	6.0498e-22	down
FBXO31	-0.597038	2.66941e-06	1.34081e-05	down
RANBP1	-0.596892	1.35804e-27	3.30662e-26	down
MRPL39	-0.596835	5.70775e-05	0.000234605	down
WWP1	-0.596703	2.18442e-11	1.9723e-10	down
GHITM	-0.596611	2.16571e-24	4.59608e-23	down
NOLC1	-0.596255	5.5865e-26	1.27617e-24	down
PDSS2	-0.595543	5.35073e-08	3.31423e-07	down
SLIRP	-0.594837	4.39355e-09	3.13166e-08	down
NTHL1	-0.594366	0.00912025	0.0236359	down
MALSU1	-0.594122	1.31547e-11	1.20398e-10	down
ADAMTS12	-0.594002	2.19663e-06	1.1145e-05	down
KDM1B	-0.593276	0.000190611	0.000709753	down
MORC4	-0.592522	1.23907e-07	7.34502e-07	down
PAICS	-0.592033	1.05737e-29	2.88447e-28	down
FASTKD3	-0.592016	0.00596214	0.0161703	down
VIM	-0.591709	9.48939e-11	8.05537e-10	down
TAF12	-0.591063	6.05415e-06	2.90587e-05	down
STAP2	-0.590699	0.000133184	0.000508867	down
CETN2	-0.590121	3.7695e-05	0.000160332	down
RTN4IP1	-0.589692	0.000475635	0.001631	down
PNKD	-0.589485	2.94565e-15	3.72824e-14	down
PSMG4	-0.589105	0.00257457	0.00759397	down
MAP1A	-0.588921	0.01201	0.030071	down
PUDP	-0.588756	2.36202e-06	1.19324e-05	down
SEC61B	-0.58875	1.32773e-20	2.30858e-19	down
ZPR1	-0.588739	8.31613e-11	7.09371e-10	down
GLRX3	-0.588665	1.08137e-13	1.18689e-12	down
CAPG	-0.588656	9.30383e-07	4.97941e-06	down
GPD1L	-0.58847	3.51021e-05	0.000150442	down
CUTC	-0.587996	0.000174285	0.000653291	down
NEK3	-0.587735	0.000581328	0.00195994	down
DARS2	-0.587256	3.23645e-11	2.87232e-10	down
GATA4	-0.587145	0.0114167	0.0287597	down
SLC39A11	-0.586651	0.000285598	0.00102226	down
OLFM2	-0.586624	3.4041e-05	0.000146117	down
RPS12	-0.586473	4.02244e-39	1.58295e-37	down
SLC25A33	-0.585373	1.85285e-07	1.07432e-06	down
PCBD1	-0.585324	8.6827e-13	8.8909e-12	down
SLC9B2	-0.585148	5.12427e-05	0.000212676	down
RPS6	-0.585035	5.24273e-43	2.39919e-41	down
POLDIP2	-0.584898	5.4173e-19	8.55142e-18	down
TIMM8A	-0.584719	0.000541839	0.00184139	down
NFE2L3	-0.584318	3.59442e-10	2.89867e-09	down
MRPL34	-0.584288	8.10235e-06	3.82493e-05	down
COPRS	-0.58416	9.57809e-07	5.11451e-06	down
KARS	-0.583749	2.6642e-24	5.62002e-23	down
CCDC69	-0.583537	0.000503468	0.00171889	down
NIPSNAP1	-0.583201	3.23381e-32	9.85507e-31	down
PFDN2	-0.583122	8.82236e-11	7.50274e-10	down
ERN1	-0.583047	0.000292884	0.00104647	down
SCN9A	-0.582392	6.02602e-24	1.25608e-22	down
CCDC51	-0.5819	3.68423e-06	1.81677e-05	down
RPL8	-0.581519	4.33908e-49	2.48815e-47	down
DPAGT1	-0.581412	3.92387e-10	3.14828e-09	down
NOP56	-0.581186	1.58988e-39	6.40007e-38	down
CCT6A	-0.581024	3.07903e-37	1.14437e-35	down
ARL4D	-0.580415	0.0110228	0.0278976	down
LAP3	-0.580298	4.31255e-18	6.53582e-17	down
MAIP1	-0.579599	1.52422e-06	7.94871e-06	down
STIP1	-0.579481	6.25986e-29	1.64999e-27	down
GCFC2	-0.578916	0.00032876	0.00116166	down
MARS2	-0.578906	1.4175e-06	7.42246e-06	down
FAM219A	-0.57846	7.45e-07	4.02248e-06	down
MCM7	-0.57806	4.27174e-42	1.91737e-40	down
AFMID	-0.576897	7.6451e-09	5.28313e-08	down
SMAD7	-0.576653	7.88692e-12	7.41818e-11	down
PSMB2	-0.576633	2.58676e-29	6.88283e-28	down
TSR1	-0.576549	4.09989e-15	5.10633e-14	down
HINT1	-0.576351	1.61256e-22	3.1034e-21	down
PLEKHG3	-0.575963	2.0463e-06	1.04199e-05	down
PLXNB2	-0.575953	6.49569e-28	1.61805e-26	down
TMEM70	-0.575888	1.35864e-07	8.00653e-07	down
UTP14A	-0.575603	7.17457e-06	3.40871e-05	down
UBA52	-0.575476	1.47288e-28	3.78983e-27	down
C19orf24	-0.574963	7.90197e-10	6.147e-09	down
SPATA2L	-0.574912	0.000114426	0.000443103	down
GTPBP10	-0.574881	5.944e-05	0.00024339	down
GPR157	-0.574777	0.00575973	0.0156788	down
ANKH	-0.574728	1.42245e-06	7.44558e-06	down
SH3TC1	-0.574453	8.67738e-15	1.04553e-13	down
PTPN18	-0.574434	7.75862e-06	3.66883e-05	down
NUP37	-0.574151	3.56869e-08	2.25637e-07	down
MPV17	-0.574077	9.38265e-08	5.65738e-07	down
ALG3	-0.573957	1.74741e-14	2.0272e-13	down
CDK18	-0.573955	0.000613627	0.00205896	down
GALE	-0.573509	1.17034e-14	1.39104e-13	down
IARS	-0.57344	6.46739e-24	1.34608e-22	down
SDHB	-0.573035	2.57195e-11	2.30589e-10	down
BAG2	-0.572998	8.71606e-09	5.97618e-08	down
LTV1	-0.572937	2.63397e-06	1.32443e-05	down
TACC2	-0.572429	0.00013664	0.000521222	down
PTGES2	-0.572143	8.34514e-14	9.25343e-13	down
MRPL2	-0.571733	1.09351e-07	6.5214e-07	down
SIAH2	-0.571418	2.36947e-05	0.000103962	down
EIF3J	-0.570618	8.24531e-17	1.16304e-15	down
TMCO6	-0.570325	0.00489534	0.013557	down
RPL5	-0.569924	1.556e-33	5.02533e-32	down
GNPNAT1	-0.569856	1.50904e-12	1.51757e-11	down
DNAJC2	-0.569687	1.53222e-09	1.15421e-08	down
EBNA1BP2	-0.569323	9.43033e-13	9.62839e-12	down
EFNA2	-0.569164	0.00147131	0.00455998	down
EIF2A	-0.568968	3.98887e-12	3.87282e-11	down
CLTB	-0.568951	4.34892e-09	3.10142e-08	down
RPL37A	-0.568898	1.00418e-39	4.07737e-38	down
HDGF	-0.568857	1.92618e-28	4.91124e-27	down
RPL27A	-0.568663	4.29006e-22	8.03613e-21	down
MYO18A	-0.568611	1.24676e-19	2.04146e-18	down
CGN	-0.567907	4.17563e-12	4.0374e-11	down
B4GALT2	-0.567841	2.7883e-10	2.27352e-09	down
UCK2	-0.567677	1.15986e-09	8.86069e-09	down
MOCS1	-0.567657	0.000311949	0.00110699	down
JAG1	-0.567536	2.69824e-34	8.94047e-33	down
PTRH2	-0.567128	3.06465e-05	0.000132478	down
RPL23	-0.566823	1.0634e-28	2.76661e-27	down
BPHL	-0.566562	2.66687e-05	0.000116466	down
SEM1	-0.566514	2.14255e-16	2.93666e-15	down
PER1	-0.566438	0.000412151	0.00143006	down
SERINC2	-0.565558	9.83535e-06	4.57085e-05	down
SLC25A37	-0.565115	0.000335701	0.00118407	down
PLD1	-0.565054	3.56152e-09	2.56989e-08	down
RPL37	-0.565	5.92407e-32	1.77079e-30	down
TMEM45B	-0.564898	0.0143283	0.0352228	down
RPL4	-0.564687	5.45212e-43	2.48691e-41	down
RPS7	-0.564629	5.89038e-14	6.60975e-13	down
BCCIP	-0.563946	1.97762e-11	1.79133e-10	down
PIM2	-0.563853	7.37961e-06	3.50139e-05	down
ZNF121	-0.56374	9.67431e-05	0.000380286	down
CSRNP1	-0.563384	8.32729e-06	3.92058e-05	down
TEAD4	-0.563331	7.05738e-07	3.81931e-06	down
RRP1	-0.563121	7.01436e-10	5.50222e-09	down
RPL30	-0.562906	7.1331e-30	1.96882e-28	down
STRADB	-0.562762	8.95168e-06	4.1851e-05	down
PNP	-0.562526	4.18108e-09	2.99084e-08	down
CYB5B	-0.56227	3.97795e-22	7.5015e-21	down
FAM83D	-0.562113	2.57278e-13	2.7445e-12	down
NOCT	-0.562032	0.0065285	0.0175136	down
NOC3L	-0.562022	2.69497e-06	1.3522e-05	down
CTU2	-0.561841	4.28975e-06	2.10135e-05	down
NCL	-0.561834	5.75787e-39	2.25327e-37	down
FAM98A	-0.561374	2.0516e-09	1.52421e-08	down
CCSER2	-0.560832	2.97451e-05	0.000128859	down
HEBP1	-0.560153	4.16499e-08	2.61456e-07	down
SLC25A18	-0.55992	0.0116886	0.0293815	down
PEMT	-0.559883	0.000153741	0.000582813	down
TRAF2	-0.559693	6.52334e-07	3.53847e-06	down
MTSS1	-0.559322	8.08584e-05	0.000321899	down
TRIM8	-0.558954	3.19197e-20	5.4094e-19	down
HSP90B1	-0.55866	3.94064e-41	1.66753e-39	down
RPL26	-0.558244	0.00560904	0.0153191	down
RGS5	-0.557977	0.0162761	0.0394315	down
TDP2	-0.557904	2.9451e-06	1.47087e-05	down
RXRA	-0.55776	2.08761e-10	1.72319e-09	down
CDKN3	-0.557713	5.66598e-09	3.97609e-08	down
PMPCA	-0.557616	2.99899e-18	4.58463e-17	down
TMEM147	-0.557414	1.31262e-12	1.32669e-11	down
GART	-0.557351	7.85892e-12	7.40013e-11	down
TTC39C	-0.557272	1.98564e-05	8.82234e-05	down
IQCE	-0.557159	2.40644e-06	1.21437e-05	down
PHF5A	-0.556627	1.46614e-07	8.60032e-07	down
SLC38A6	-0.556521	0.000677266	0.00225632	down
DTNA	-0.556498	1.555e-06	8.09417e-06	down
GNL3	-0.556472	3.27385e-10	2.65403e-09	down
PSMD4	-0.556338	6.42938e-21	1.14193e-19	down
PUS7	-0.556164	4.7532e-09	3.36412e-08	down
MRPL21	-0.554945	3.37711e-13	3.57806e-12	down
RPS14	-0.554514	4.2749e-35	1.45419e-33	down
CNNM3	-0.55436	4.09855e-09	2.93479e-08	down
TXNDC11	-0.553869	1.98007e-10	1.63828e-09	down
INPP1	-0.553483	1.37075e-09	1.03815e-08	down
RPL18	-0.553455	5.94797e-27	1.40442e-25	down
EPS8	-0.55333	5.15886e-12	4.94385e-11	down
NKAP	-0.553039	0.000126731	0.000486993	down
DOCK4	-0.552672	2.46249e-08	1.59942e-07	down
BZW2	-0.552566	3.28013e-14	3.73138e-13	down
RHBDF2	-0.55235	6.37864e-05	0.000259298	down
HFE	-0.551879	0.00589718	0.016022	down
AHCY	-0.551522	1.51212e-29	4.07749e-28	down
FAM69B	-0.550831	1.25831e-07	7.45594e-07	down
RPS8	-0.550821	2.51911e-35	8.67427e-34	down
METAP1D	-0.55007	5.59517e-08	3.45068e-07	down
AGBL3	-0.549962	0.00986546	0.0253475	down
SRPK1	-0.549546	1.13832e-13	1.24647e-12	down
NRCAM	-0.549442	5.08091e-06	2.4696e-05	down
PTPRU	-0.549367	3.94859e-05	0.000167595	down
TCP1	-0.548674	4.11841e-27	9.84005e-26	down
BLMH	-0.548285	7.85134e-17	1.10969e-15	down
JAML	-0.54712	0.00312163	0.00903125	down
SNRPD2	-0.547105	2.63397e-16	3.59268e-15	down
EIF4EBP1	-0.547087	1.89809e-13	2.04496e-12	down
COL9A2	-0.547023	9.23559e-08	5.57355e-07	down
ATOX1	-0.546544	2.90222e-06	1.44998e-05	down
GALT	-0.546412	0.00446193	0.0124624	down
LRG1	-0.546159	1.0456e-05	4.84648e-05	down
DUS3L	-0.545832	5.33404e-07	2.91587e-06	down
IMPDH2	-0.545731	9.1846e-22	1.68893e-20	down
THAP4	-0.545726	4.63009e-08	2.88974e-07	down
RPL11	-0.544961	8.33699e-35	2.81554e-33	down
PSMB1	-0.544727	2.3754e-20	4.0648e-19	down
MINDY1	-0.544646	0.00394722	0.0111691	down
KNG1	-0.543921	3.88696e-07	2.16098e-06	down
TEAD3	-0.543804	1.64083e-05	7.38374e-05	down
EIF3M	-0.543794	3.87274e-13	4.07552e-12	down
PRMT7	-0.543541	3.27644e-08	2.08662e-07	down
ADGRL2	-0.542884	1.65683e-17	2.43481e-16	down
MPLKIP	-0.542861	2.31345e-06	1.16997e-05	down
EIF2B3	-0.542765	4.06609e-05	0.000171906	down
RPS20	-0.542272	6.85204e-28	1.70379e-26	down
TENT4B	-0.542246	9.3861e-05	0.0003702	down
MRPS2	-0.542089	4.13603e-11	3.63169e-10	down
HHEX	-0.541064	2.06136e-13	2.21407e-12	down
RPL35	-0.540895	7.64563e-35	2.58828e-33	down
BCAT1	-0.539746	5.043e-16	6.73471e-15	down
SRGAP1	-0.539371	0.00474599	0.0131876	down
TNFAIP8L1	-0.538962	5.01418e-11	4.36728e-10	down
RPL28	-0.538931	1.00803e-25	2.27681e-24	down
FAM162A	-0.538668	2.32482e-05	0.000102227	down
NDUFS4	-0.538626	2.47201e-05	0.000108292	down
PSMD14	-0.538565	6.16212e-23	1.21079e-21	down
SYTL5	-0.538335	0.000121513	0.000468094	down
TMEM99	-0.538207	0.012874	0.0320061	down
CTNNAL1	-0.537837	7.13254e-11	6.12126e-10	down
EXOSC3	-0.537276	3.90727e-08	2.45827e-07	down
PEPD	-0.536735	8.60791e-14	9.52975e-13	down
RAB3D	-0.536546	5.23065e-05	0.000216771	down
SRM	-0.536525	1.79988e-12	1.8036e-11	down
FLNA	-0.536465	2.41878e-25	5.38532e-24	down
CTSC	-0.536326	2.78721e-20	4.75213e-19	down
FAU	-0.535716	2.13436e-16	2.92828e-15	down
INTS10	-0.535703	2.81552e-08	1.81529e-07	down
BRMS1	-0.535703	1.5451e-23	3.14595e-22	down
LEO1	-0.535501	3.7519e-09	2.69895e-08	down
PYCR1	-0.535425	2.77069e-16	3.77185e-15	down
FNIP2	-0.535118	3.21323e-10	2.60789e-09	down
TIMM13	-0.534112	8.79592e-15	1.058e-13	down
PHB2	-0.5341	1.47108e-23	3.01271e-22	down
TIMM50	-0.533991	1.66094e-14	1.93007e-13	down
FERMT1	-0.533789	0.00073302	0.00242425	down
SLC7A6OS	-0.533671	0.00524525	0.0144265	down
ALAD	-0.533414	1.66317e-07	9.71153e-07	down
SAT2	-0.533398	3.55584e-05	0.000152119	down
RPS27A	-0.532896	2.85621e-25	6.32917e-24	down
CXCL1	-0.532568	0.0103944	0.0264935	down
TOMM7	-0.532471	1.54731e-12	1.55495e-11	down
RPL41	-0.532461	2.41124e-17	3.51406e-16	down
LARP4	-0.532308	1.14478e-14	1.36182e-13	down
RNF126	-0.531736	3.09357e-15	3.90491e-14	down
NAA20	-0.531624	1.4889e-10	1.24584e-09	down
AEN	-0.531584	7.6221e-08	4.64366e-07	down
HSCB	-0.531547	0.00155763	0.00480948	down
PDIA6	-0.53068	1.95475e-20	3.36547e-19	down
RPS13	-0.530346	2.9852e-20	5.07513e-19	down
PGAP2	-0.529495	0.000428515	0.00148244	down
TRAP1	-0.529278	5.68043e-10	4.48591e-09	down
METTL1	-0.528984	1.03184e-07	6.17653e-07	down
AGPS	-0.528614	1.47324e-21	2.69499e-20	down
IMPDH1	-0.528259	9.66769e-12	8.97472e-11	down
NDUFS2	-0.527941	3.75693e-13	3.96255e-12	down
TMEM141	-0.527809	4.43685e-06	2.16812e-05	down
SH3BGRL2	-0.527595	8.60094e-08	5.21063e-07	down
TMC6	-0.527268	2.95741e-13	3.15001e-12	down
THOC5	-0.527031	1.67359e-13	1.81281e-12	down
APEX1	-0.526902	4.57967e-23	9.10039e-22	down
DOCK5	-0.526692	4.28169e-07	2.36638e-06	down
SLC48A1	-0.526643	0.000138656	0.000528192	down
ATP1B1	-0.526447	3.87409e-16	5.21832e-15	down
TMEM144	-0.526389	6.12604e-05	0.00024997	down
HSPH1	-0.525988	2.60913e-19	4.18444e-18	down
SLC29A3	-0.525947	3.58293e-08	2.26232e-07	down
GPX3	-0.525704	1.69633e-13	1.83463e-12	down
TNS1	-0.525496	0.00541068	0.014835	down
TRABD	-0.525461	2.9772e-09	2.15824e-08	down
HES6	-0.525393	6.31075e-05	0.000256836	down
HAUS4	-0.525243	0.00233841	0.00697648	down
TOMM22	-0.52456	6.28115e-12	5.9584e-11	down
F5	-0.524332	5.6654e-16	7.5301e-15	down
RPS27	-0.524261	1.63124e-09	1.22421e-08	down
TRIB3	-0.524243	3.62238e-13	3.82925e-12	down
SLC35G1	-0.524217	4.11426e-07	2.27923e-06	down
EGLN1	-0.52405	2.93454e-09	2.12951e-08	down
TATDN1	-0.523799	0.000377842	0.00131785	down
HPS4	-0.523589	4.81386e-06	2.34582e-05	down
OARD1	-0.523511	2.05584e-05	9.10834e-05	down
WDR43	-0.522969	1.55668e-12	1.56324e-11	down
ECI1	-0.522845	6.96789e-13	7.22983e-12	down
STXBP4	-0.522553	0.000213158	0.000786824	down
XPOT	-0.5223	3.94549e-18	5.99894e-17	down
CMSS1	-0.522256	1.56148e-05	7.05606e-05	down
GFM1	-0.52183	2.23461e-08	1.45815e-07	down
NR6A1	-0.521789	6.08505e-08	3.73967e-07	down
PFKFB2	-0.521726	0.00176426	0.00539298	down
SELENOP	-0.52149	1.08851e-14	1.29817e-13	down
PDCD11	-0.521279	3.48329e-16	4.71452e-15	down
TCIM	-0.521016	5.70192e-10	4.49783e-09	down
MRPL15	-0.520504	0.000541041	0.00183912	down
ACSL4	-0.520332	3.95146e-05	0.000167601	down
FAM206A	-0.520139	2.7551e-05	0.000120057	down
EIF4B	-0.520045	1.0636e-27	2.60776e-26	down
CHST3	-0.519929	1.33806e-09	1.01503e-08	down
BUD23	-0.519418	8.42016e-10	6.51762e-09	down
RPL34	-0.519162	3.52315e-19	5.60552e-18	down
SOX13	-0.518938	3.66179e-10	2.94474e-09	down
FGFR1	-0.518382	1.10475e-07	6.58213e-07	down
FAM86C1	-0.518341	0.00627921	0.0169159	down
PRMT1	-0.518164	4.55856e-24	9.51608e-23	down
RUVBL1	-0.517457	5.93892e-16	7.87874e-15	down
RSL1D1	-0.51735	2.3143e-14	2.65635e-13	down
URB1	-0.517155	3.18357e-11	2.83076e-10	down
TRIM5	-0.517138	5.00994e-05	0.000208485	down
DDX31	-0.516862	9.26175e-06	4.32143e-05	down
AMDHD1	-0.516539	0.00247231	0.00732775	down
DCXR	-0.516451	1.0747e-08	7.26937e-08	down
PRPSAP1	-0.516364	1.71401e-07	9.98348e-07	down
METAP1	-0.516346	2.20907e-08	1.44283e-07	down
SLC29A4	-0.515966	8.44757e-11	7.20145e-10	down
CCPG1	-0.515875	5.07707e-10	4.023e-09	down
RPS19BP1	-0.515309	2.70011e-07	1.53765e-06	down
SPRYD3	-0.515008	6.08082e-05	0.000248414	down
SEMA6A	-0.514701	0.000120002	0.000462399	down
XRCC4	-0.514566	0.00793852	0.020862	down
SHH	-0.514054	0.00551194	0.0150862	down
MTLN	-0.513634	0.00607843	0.0164539	down
QPCTL	-0.513326	0.00114249	0.00361995	down
CALCOCO2	-0.513253	4.78065e-05	0.000199891	down
RRBP1	-0.513186	4.33046e-24	9.05337e-23	down
CMPK1	-0.512567	1.16119e-15	1.51192e-14	down
SERPING1	-0.512302	8.54251e-09	5.86577e-08	down
RPL31	-0.511938	3.8556e-25	8.53029e-24	down
ENC1	-0.511588	6.09768e-11	5.26853e-10	down
WDR12	-0.511546	4.09319e-11	3.59632e-10	down
MMACHC	-0.5112	0.000252412	0.000917736	down
S100P	-0.511169	2.91492e-08	1.87422e-07	down
PLEKHA6	-0.509555	1.38982e-05	6.31897e-05	down
SLC25A13	-0.509097	1.09571e-11	1.01208e-10	down
MRPS34	-0.509086	1.27153e-14	1.50368e-13	down
MRPL44	-0.508817	4.39769e-07	2.42858e-06	down
IER2	-0.508758	6.87348e-09	4.78047e-08	down
TCAF1	-0.508696	0.00100831	0.00323051	down
BID	-0.508221	8.65394e-10	6.68956e-09	down
MAD2L2	-0.507632	2.53508e-07	1.44778e-06	down
POLR1D	-0.507347	1.32945e-07	7.85095e-07	down
POLR3K	-0.507283	5.89862e-06	2.8419e-05	down
BCAP31	-0.506946	2.22812e-14	2.5637e-13	down
CACYBP	-0.506893	3.47215e-10	2.80831e-09	down
SNRPF	-0.506304	3.63566e-15	4.54021e-14	down
PDF	-0.506267	0.000215536	0.000794677	down
FERMT2	-0.506215	1.2558e-08	8.42937e-08	down
MTIF2	-0.506162	8.42355e-07	4.52726e-06	down
RACK1	-0.506057	4.69216e-36	1.66886e-34	down
SLC45A3	-0.505793	0.00449786	0.0125502	down
GATB	-0.505556	1.69094e-06	8.74667e-06	down
DTD2	-0.505496	3.81147e-10	3.05984e-09	down
C8orf59	-0.505102	0.000561043	0.00190067	down
METTL5	-0.50509	3.60617e-07	2.01284e-06	down
PGAM5	-0.504688	3.54577e-10	2.8629e-09	down
RPL13	-0.504248	2.73123e-31	7.9279e-30	down
TMEM38B	-0.504134	9.78246e-05	0.000384108	down
MRPL11	-0.503989	6.78838e-22	1.25487e-20	down
MIEF1	-0.503705	2.57284e-09	1.8885e-08	down
NPM1	-0.503602	1.90725e-23	3.85538e-22	down
GAMT	-0.503248	1.61513e-17	2.37602e-16	down
RAC3	-0.50312	9.96571e-05	0.00039043	down
CCT8	-0.503025	4.03372e-21	7.23752e-20	down
ATXN1	-0.502772	5.03973e-05	0.000209539	down
DHODH	-0.502578	5.29224e-05	0.000218872	down
NLRP1	-0.502313	1.96055e-12	1.95763e-11	down
PPFIA3	-0.50221	0.012903	0.0320614	down
PKP2	-0.502119	1.81865e-09	1.35689e-08	down
TMEM220	-0.502089	0.000419259	0.00145257	down
ACAT1	-0.502011	5.05699e-06	2.45918e-05	down
NTMT1	-0.501821	7.374e-05	0.000295823	down
PGP	-0.501287	5.52144e-11	4.78832e-10	down
NSFL1C	-0.501211	1.01103e-20	1.7755e-19	down
SFI1	-0.50072	0.000245897	0.000895671	down
ASL	-0.500615	1.53615e-14	1.79658e-13	down
RRP8	-0.50036	0.00137972	0.00429889	down
TRMT112	-0.500005	1.41788e-14	1.66553e-13	down
MPHOSPH10	-0.499939	4.6538e-09	3.29875e-08	down
RPL29	-0.499856	1.08946e-20	1.89898e-19	down
HSDL2	-0.499501	1.49641e-09	1.12845e-08	down
TXNL4B	-0.499305	0.000376163	0.00131232	down
BAIAP2L1	-0.499095	1.60159e-11	1.4573e-10	down
GNPDA1	-0.498993	1.75521e-07	1.0215e-06	down
DERA	-0.498839	8.43769e-10	6.52759e-09	down
PPAT	-0.498486	2.27359e-08	1.48221e-07	down
MKKS	-0.498296	0.000412967	0.00143254	down
PSMG1	-0.498184	1.31068e-07	7.74663e-07	down
NFKB1	-0.497674	5.03509e-09	3.55467e-08	down
PPIH	-0.496194	0.000320239	0.00113297	down
TLE1	-0.496001	8.4197e-15	1.0171e-13	down
CMC2	-0.495753	8.35429e-06	3.92802e-05	down
RPL36	-0.495716	1.49973e-23	3.06245e-22	down
ACTN1	-0.495706	6.42645e-16	8.50143e-15	down
ZNF622	-0.495653	0.000105465	0.000411234	down
CARNMT1	-0.495397	3.5943e-06	1.77679e-05	down
GSTK1	-0.494619	7.15938e-12	6.75955e-11	down
ELAC2	-0.493919	3.54216e-18	5.39737e-17	down
SDHAF3	-0.493034	0.000990847	0.00318181	down
PHKA2	-0.492752	1.28708e-05	5.88228e-05	down
ZBTB8OS	-0.492002	6.88022e-05	0.00027744	down
NOL10	-0.491669	1.62499e-06	8.43352e-06	down
BOD1	-0.491285	2.38603e-09	1.7578e-08	down
EIF3I	-0.491149	4.41554e-16	5.91927e-15	down
RAB4A	-0.490879	1.28825e-05	5.8838e-05	down
NUP88	-0.490349	1.22323e-07	7.25723e-07	down
DTYMK	-0.490309	1.8373e-17	2.69721e-16	down
SSR3	-0.490207	8.36526e-17	1.17877e-15	down
LETM1	-0.490132	9.31637e-15	1.11596e-13	down
MX2	-0.490112	5.58456e-12	5.32999e-11	down
LPGAT1	-0.490017	6.35372e-13	6.60721e-12	down
SLC37A1	-0.489254	0.0175044	0.0419299	down
MZT2A	-0.489045	3.11616e-09	2.25432e-08	down
HAVCR1	-0.488685	1.00435e-06	5.35083e-06	down
DPM2	-0.48861	1.41233e-07	8.31243e-07	down
MPZL2	-0.488257	1.96515e-05	8.73681e-05	down
PACSIN2	-0.487797	4.05065e-12	3.92737e-11	down
CHP1	-0.487608	1.4124e-10	1.18394e-09	down
CCNA2	-0.487309	3.86448e-12	3.76245e-11	down
AIMP2	-0.486569	0.000195723	0.000727436	down
PABPC4	-0.486396	4.11781e-22	7.7341e-21	down
RUVBL2	-0.485857	1.82337e-13	1.96596e-12	down
DCLRE1A	-0.48436	2.83623e-05	0.000123363	down
HEATR1	-0.484214	2.22157e-09	1.64095e-08	down
GFER	-0.484034	1.52943e-07	8.95664e-07	down
ZDHHC9	-0.483796	1.60473e-07	9.38588e-07	down
SCARB1	-0.483408	2.9875e-20	5.07513e-19	down
COA6	-0.48317	0.000296798	0.00105777	down
THRB	-0.483104	1.33111e-06	6.99615e-06	down
ZC3H12A	-0.483081	0.0144037	0.0353834	down
ERF	-0.482908	8.55352e-11	7.28735e-10	down
MRPL48	-0.482714	7.35128e-05	0.000295165	down
BCS1L	-0.48214	7.5224e-07	4.05845e-06	down
C19orf48	-0.481525	8.03347e-13	8.27436e-12	down
MGMT	-0.481502	0.00447495	0.0124937	down
MRPS27	-0.481292	7.76001e-09	5.35463e-08	down
MRPL4	-0.481267	1.21285e-09	9.24541e-09	down
MARS	-0.48088	2.82793e-21	5.10662e-20	down
EHD4	-0.48081	1.77841e-07	1.03371e-06	down
NAT10	-0.480757	4.65732e-09	3.29958e-08	down
SPON2	-0.480026	0.0141575	0.0348335	down
ZC3H3	-0.479734	0.00710438	0.018889	down
TYW3	-0.479733	0.000388891	0.00135403	down
TUBGCP4	-0.479632	0.000792707	0.00260083	down
MCTS1	-0.479514	0.00158913	0.0048992	down
TMPPE	-0.479329	0.00749751	0.0198292	down
METTL8	-0.479276	2.89507e-05	0.000125689	down
PPP1R13L	-0.479099	0.00887027	0.0230775	down
B4GAT1	-0.478947	9.89443e-19	1.5411e-17	down
SCCPDH	-0.478681	4.52921e-10	3.61333e-09	down
AL136454.1	-0.477782	3.66299e-12	3.5737e-11	down
LRPPRC	-0.47723	9.47528e-16	1.23946e-14	down
EIF2S1	-0.476689	7.75061e-12	7.30304e-11	down
ENDOG	-0.476667	0.00251444	0.00744163	down
WDCP	-0.476358	0.00740445	0.01962	down
LARS	-0.475685	4.99572e-11	4.3539e-10	down
SORBS3	-0.475177	3.4943e-08	2.21332e-07	down
FBXO44	-0.475148	0.00691029	0.0184392	down
FAM120A	-0.475026	8.45065e-15	1.01996e-13	down
AKR1D1	-0.475013	0.002344	0.0069917	down
SMCO4	-0.47481	0.000765049	0.00252009	down
SLC29A2	-0.474455	1.19513e-14	1.41811e-13	down
RPS26	-0.474267	0.00213564	0.00641651	down
SNX10	-0.474184	0.00015423	0.000584385	down
GRWD1	-0.474054	4.21828e-09	3.01284e-08	down
MYO5B	-0.473757	0.000354545	0.00124525	down
PSMC6	-0.473658	7.10665e-09	4.93044e-08	down
MRPS33	-0.47328	3.2957e-08	2.09698e-07	down
CKS2	-0.472905	4.76588e-08	2.97185e-07	down
EXOSC8	-0.472784	2.63954e-07	1.5056e-06	down
TMEM164	-0.472564	2.97623e-05	0.000128894	down
SNRPB	-0.472275	2.42239e-23	4.88266e-22	down
SEL1L3	-0.472224	3.43575e-15	4.31357e-14	down
BOLA3	-0.471736	0.000444734	0.00153252	down
CIB1	-0.471705	3.01978e-05	0.000130659	down
CEBPG	-0.471455	3.33228e-12	3.26466e-11	down
JOSD1	-0.471345	1.05721e-08	7.16483e-08	down
USP31	-0.470477	0.000333231	0.00117627	down
STK24	-0.470455	9.40955e-07	5.03024e-06	down
REX1BD	-0.470433	1.12599e-07	6.70014e-07	down
ABHD14B	-0.469907	0.00185176	0.00563469	down
LAMTOR4	-0.469718	4.38993e-07	2.42525e-06	down
DLAT	-0.469685	2.07047e-10	1.71005e-09	down
PYCR2	-0.469233	0.00698496	0.0186111	down
NCLN	-0.468819	5.03884e-14	5.67233e-13	down
DNAJB11	-0.468574	2.89874e-11	2.58732e-10	down
PSMA3	-0.468291	9.98331e-13	1.01708e-11	down
GCH1	-0.467703	1.08144e-07	6.45969e-07	down
EPRS	-0.467278	1.33043e-14	1.56674e-13	down
RBMS2	-0.466986	3.07694e-07	1.73955e-06	down
PDCD5	-0.466864	1.44298e-09	1.0905e-08	down
PLPBP	-0.466758	2.99164e-06	1.49359e-05	down
DAZAP1	-0.466034	1.75119e-15	2.25092e-14	down
TMEM258	-0.465995	7.46601e-15	9.05785e-14	down
LPCAT3	-0.465874	0.000969676	0.00312096	down
VCP	-0.46534	9.59734e-30	2.63346e-28	down
PTDSS1	-0.463811	1.19841e-08	8.05185e-08	down
PRDX4	-0.463619	4.48202e-09	3.18986e-08	down
ARMC6	-0.463393	9.86611e-11	8.36001e-10	down
MRM3	-0.462705	0.0103535	0.0264131	down
SMS	-0.462625	1.0354e-08	7.03062e-08	down
HMGCL	-0.462592	1.50416e-05	6.80579e-05	down
PSMC5	-0.462389	2.08499e-16	2.87177e-15	down
NXPH4	-0.462385	0.00783755	0.0206391	down
ITPA	-0.461948	2.80126e-09	2.04017e-08	down
OXA1L	-0.461648	7.68521e-12	7.24627e-11	down
FTSJ3	-0.461041	1.11187e-11	1.02632e-10	down
MAPK6	-0.461027	9.24422e-12	8.61792e-11	down
IL13RA1	-0.460964	3.53574e-12	3.45435e-11	down
SERP1	-0.460364	2.31894e-12	2.30238e-11	down
LACTB	-0.459983	2.50127e-05	0.000109472	down
DIMT1	-0.459214	1.48001e-06	7.72964e-06	down
IMP3	-0.458547	7.22451e-08	4.40717e-07	down
UFD1	-0.458492	2.01649e-09	1.49972e-08	down
GUCD1	-0.458376	7.29013e-10	5.70094e-09	down
AGMO	-0.458307	1.89493e-07	1.096e-06	down
ZFYVE19	-0.458275	0.011401	0.0287358	down
HEBP2	-0.458033	9.06518e-08	5.48006e-07	down
NOP14	-0.457824	7.64536e-13	7.89197e-12	down
QPRT	-0.457459	6.7763e-12	6.41079e-11	down
SLC25A25	-0.457397	1.17528e-05	5.41087e-05	down
BYSL	-0.457123	1.92261e-06	9.83094e-06	down
POLR1E	-0.456539	2.28367e-06	1.15616e-05	down
IFNAR2	-0.456277	0.00522235	0.0143663	down
DNAJC16	-0.456153	8.39043e-07	4.51118e-06	down
CDK5RAP1	-0.45607	4.91125e-07	2.69629e-06	down
CBWD5	-0.456028	0.0106304	0.0270018	down
CYB5R3	-0.455913	3.44844e-11	3.04699e-10	down
RPL10A	-0.455905	4.53968e-22	8.49241e-21	down
ACAA2	-0.455783	1.46103e-06	7.63901e-06	down
PPIL1	-0.455776	1.80841e-05	8.08605e-05	down
CYC1	-0.455521	1.38008e-14	1.62249e-13	down
RPS3A	-0.455383	3.72293e-16	5.01952e-15	down
CSTF2	-0.455302	7.21581e-05	0.000289974	down
PRADC1	-0.455134	0.00402479	0.011361	down
ACOX1	-0.454967	1.18744e-07	7.05086e-07	down
CDC20	-0.454941	2.0958e-16	2.88383e-15	down
MAN2A1	-0.453732	4.88415e-09	3.45506e-08	down
POLR3G	-0.453571	0.0110702	0.0279872	down
STXBP5	-0.453391	0.000113711	0.000440576	down
RPL35A	-0.45331	1.40795e-22	2.72831e-21	down
FARSB	-0.453268	1.34485e-09	1.01908e-08	down
SLC7A6	-0.453206	1.59346e-07	9.32384e-07	down
SUB1	-0.453183	8.39845e-12	7.86074e-11	down
NAA50	-0.453161	5.69301e-15	6.99747e-14	down
CHEK2	-0.45299	0.000570261	0.00192725	down
SLC25A3	-0.452895	1.55401e-23	3.15953e-22	down
PLOD3	-0.452885	4.19006e-12	4.04856e-11	down
HSPA5	-0.452723	4.81085e-27	1.14555e-25	down
CDKL5	-0.452605	0.0101028	0.0258531	down
MRPL22	-0.452555	1.33312e-06	7.00409e-06	down
RRAS2	-0.452493	1.95694e-05	8.70584e-05	down
MYADM	-0.452481	3.09034e-05	0.000133424	down
DNMT3B	-0.452273	8.75578e-05	0.000346898	down
PPP1R35	-0.451755	0.000168745	0.000634555	down
ANTXR2	-0.45153	1.59174e-08	1.05883e-07	down
RPL36AL	-0.451527	2.67434e-09	1.95483e-08	down
PEX5	-0.451419	2.83632e-07	1.61065e-06	down
IDE	-0.451342	2.55949e-10	2.09547e-09	down
COX6B1	-0.450771	1.9982e-13	2.14787e-12	down
[truncated: 3,997 more rows]
