# Supplementary material for: Targeting p300/CBP Attenuates Hepatocellular Carcinoma Progression through Epigenetic Regulation of Metabolism
Source: Oxford University Press journal article supplement (doi:10.1158/0008-5472.can-20-1323), 2020-12-23
Supplement: 00085472can201323-sup-241667_3_supp_6772394_ql0jc1.xlsx [file 00085472can201323-sup-241667_3_supp_6772394_ql0jc1.xlsx]

## Sheet: AllPathway_Result
PathwayID	PathwayTerm	DifGene	AllDifGene	GeneInPathway	AllGene	P-Value	FDR	Enrichment	(-log10P)
PATH:03010	Ribosome	101	2371	132	6533	2.00007e-21	5.6402e-19	2.10828	20.699
PATH:01100	Metabolic pathways	526	2371	1144	6533	7.79856e-14	1.0996e-11	1.2669	13.108
PATH:00310	Lysine degradation	34	2371	51	6533	9.46574e-06	0.00088978	1.83692	5.02385
PATH:01200	Carbon metabolism	60	2371	106	6533	1.40627e-05	0.000915479	1.55965	4.85193
PATH:03050	Proteasome	30	2371	44	6533	1.62319e-05	0.000915479	1.87867	4.78963
PATH:03008	Ribosome biogenesis in eukaryotes	45	2371	75	6533	2.28765e-05	0.0010752	1.65323	4.64061
PATH:04146	Peroxisome	47	2371	81	6533	5.07078e-05	0.00182967	1.5988	4.29493
PATH:00250	Alanine, aspartate and glutamate metabolism	25	2371	36	6533	5.19056e-05	0.00182967	1.91346	4.28479
PATH:01230	Biosynthesis of amino acids	43	2371	73	6533	6.44274e-05	0.00201873	1.62303	4.19093
PATH:04610	Complement and coagulation cascades	40	2371	69	6533	0.000186687	0.00526458	1.59732	3.72889
PATH:00330	Arginine and proline metabolism	35	2371	59	6533	0.000251584	0.00644969	1.63455	3.59932
PATH:00480	Glutathione metabolism	31	2371	51	6533	0.000307246	0.00722028	1.67484	3.51251
PATH:00260	Glycine, serine and threonine metabolism	25	2371	39	6533	0.000369304	0.00801105	1.76627	3.43262
PATH:00650	Butanoate metabolism	20	2371	30	6533	0.000683332	0.0137105	1.83692	3.16537
PATH:04520	Adherens junction	38	2371	68	6533	0.000729284	0.0137105	1.53977	3.1371

## Sheet: AllPathway2Gene
PathwayID	PathwayTerm	QueryID	Symbol	Description	P-Value	FDR	Enrichment
PATH:03010	Ribosome	RPL11	RPL11	ribosomal protein L11	2.00007e-21	5.6402e-19	2.10828
PATH:03010	Ribosome	RPS23	RPS23	ribosomal protein S23	2.00007e-21	5.6402e-19	2.10828
PATH:03010	Ribosome	RPLP2	RPLP2	ribosomal protein, large, P2	2.00007e-21	5.6402e-19	2.10828
PATH:03010	Ribosome	MRPL35	MRPL35	mitochondrial ribosomal protein L35	2.00007e-21	5.6402e-19	2.10828
PATH:03010	Ribosome	RPL26L1	RPL26L1	ribosomal protein L26-like 1	2.00007e-21	5.6402e-19	2.10828
PATH:03010	Ribosome	RPL26	RPL26	ribosomal protein L26	2.00007e-21	5.6402e-19	2.10828
PATH:03010	Ribosome	MRPL9	MRPL9	mitochondrial ribosomal protein L9	2.00007e-21	5.6402e-19	2.10828
PATH:03010	Ribosome	RPL3	RPL3	ribosomal protein L3	2.00007e-21	5.6402e-19	2.10828
PATH:03010	Ribosome	RPS19	RPS19	ribosomal protein S19	2.00007e-21	5.6402e-19	2.10828
PATH:03010	Ribosome	RPS15	RPS15	ribosomal protein S15	2.00007e-21	5.6402e-19	2.10828
PATH:03010	Ribosome	RPS6	RPS6	ribosomal protein S6	2.00007e-21	5.6402e-19	2.10828
PATH:03010	Ribosome	RPS27L	RPS27L	ribosomal protein S27-like	2.00007e-21	5.6402e-19	2.10828
PATH:03010	Ribosome	RPL18	RPL18	ribosomal protein L18	2.00007e-21	5.6402e-19	2.10828
PATH:03010	Ribosome	RPLP0	RPLP0	ribosomal protein, large, P0	2.00007e-21	5.6402e-19	2.10828
PATH:03010	Ribosome	MRPL32	MRPL32	mitochondrial ribosomal protein L32	2.00007e-21	5.6402e-19	2.10828
PATH:03010	Ribosome	RPL23	RPL23	ribosomal protein L23	2.00007e-21	5.6402e-19	2.10828
PATH:03010	Ribosome	MRPS5	MRPS5	mitochondrial ribosomal protein S5	2.00007e-21	5.6402e-19	2.10828
PATH:03010	Ribosome	RPL29	RPL29	ribosomal protein L29	2.00007e-21	5.6402e-19	2.10828
PATH:03010	Ribosome	RPL4	RPL4	ribosomal protein L4	2.00007e-21	5.6402e-19	2.10828
PATH:03010	Ribosome	FAU	FAU	Finkel-Biskis-Reilly murine sarcoma virus (FBR-MuSV) ubiquitously expressed	2.00007e-21	5.6402e-19	2.10828
PATH:03010	Ribosome	MRPL30	MRPL30	mitochondrial ribosomal protein L30	2.00007e-21	5.6402e-19	2.10828
PATH:03010	Ribosome	RPL38	RPL38	ribosomal protein L38	2.00007e-21	5.6402e-19	2.10828
PATH:03010	Ribosome	RPS8	RPS8	ribosomal protein S8	2.00007e-21	5.6402e-19	2.10828
PATH:03010	Ribosome	MRPL19	MRPL19	mitochondrial ribosomal protein L19	2.00007e-21	5.6402e-19	2.10828
PATH:03010	Ribosome	MRPL11	MRPL11	mitochondrial ribosomal protein L11	2.00007e-21	5.6402e-19	2.10828
PATH:03010	Ribosome	RPL24	RPL24	ribosomal protein L24	2.00007e-21	5.6402e-19	2.10828
PATH:03010	Ribosome	RPL36	RPL36	ribosomal protein L36	2.00007e-21	5.6402e-19	2.10828
PATH:03010	Ribosome	MRPL1	MRPL1	mitochondrial ribosomal protein L1	2.00007e-21	5.6402e-19	2.10828
PATH:03010	Ribosome	RPL5	RPL5	ribosomal protein L5	2.00007e-21	5.6402e-19	2.10828
PATH:03010	Ribosome	MRPS15	MRPS15	mitochondrial ribosomal protein S15	2.00007e-21	5.6402e-19	2.10828
PATH:03010	Ribosome	RPL22L1	RPL22L1	ribosomal protein L22-like 1	2.00007e-21	5.6402e-19	2.10828
PATH:03010	Ribosome	MRPL16	MRPL16	mitochondrial ribosomal protein L16	2.00007e-21	5.6402e-19	2.10828
PATH:03010	Ribosome	RPS12	RPS12	ribosomal protein S12	2.00007e-21	5.6402e-19	2.10828
PATH:03010	Ribosome	MRPS7	MRPS7	mitochondrial ribosomal protein S7	2.00007e-21	5.6402e-19	2.10828
PATH:03010	Ribosome	MRPL20	MRPL20	mitochondrial ribosomal protein L20	2.00007e-21	5.6402e-19	2.10828
PATH:03010	Ribosome	RPL30	RPL30	ribosomal protein L30	2.00007e-21	5.6402e-19	2.10828
PATH:03010	Ribosome	UBA52	UBA52	ubiquitin A-52 residue ribosomal protein fusion product 1	2.00007e-21	5.6402e-19	2.10828
PATH:03010	Ribosome	RPS16	RPS16	ribosomal protein S16	2.00007e-21	5.6402e-19	2.10828
PATH:03010	Ribosome	MRPL23	MRPL23	mitochondrial ribosomal protein L23	2.00007e-21	5.6402e-19	2.10828
PATH:03010	Ribosome	MRPL4	MRPL4	mitochondrial ribosomal protein L4	2.00007e-21	5.6402e-19	2.10828
PATH:03010	Ribosome	RPL12	RPL12	ribosomal protein L12	2.00007e-21	5.6402e-19	2.10828
PATH:03010	Ribosome	RPL32	RPL32	ribosomal protein L32	2.00007e-21	5.6402e-19	2.10828
PATH:03010	Ribosome	RPL34	RPL34	ribosomal protein L34	2.00007e-21	5.6402e-19	2.10828
PATH:03010	Ribosome	RPL37	RPL37	ribosomal protein L37	2.00007e-21	5.6402e-19	2.10828
PATH:03010	Ribosome	RPS26	RPS26	ribosomal protein S26	2.00007e-21	5.6402e-19	2.10828
PATH:03010	Ribosome	MRPS16	MRPS16	mitochondrial ribosomal protein S16	2.00007e-21	5.6402e-19	2.10828
PATH:03010	Ribosome	RPL18A	RPL18A	ribosomal protein L18a	2.00007e-21	5.6402e-19	2.10828
PATH:03010	Ribosome	RPL35	RPL35	ribosomal protein L35	2.00007e-21	5.6402e-19	2.10828
PATH:03010	Ribosome	MRPS10	MRPS10	mitochondrial ribosomal protein S10	2.00007e-21	5.6402e-19	2.10828
PATH:03010	Ribosome	MRPS11	MRPS11	mitochondrial ribosomal protein S11	2.00007e-21	5.6402e-19	2.10828
PATH:03010	Ribosome	RPS2	RPS2	ribosomal protein S2	2.00007e-21	5.6402e-19	2.10828
PATH:03010	Ribosome	RPL6	RPL6	ribosomal protein L6	2.00007e-21	5.6402e-19	2.10828
PATH:03010	Ribosome	MRPL13	MRPL13	mitochondrial ribosomal protein L13	2.00007e-21	5.6402e-19	2.10828
PATH:03010	Ribosome	RPL23A	RPL23A	ribosomal protein L23a	2.00007e-21	5.6402e-19	2.10828
PATH:03010	Ribosome	RPL37A	RPL37A	ribosomal protein L37a	2.00007e-21	5.6402e-19	2.10828
PATH:03010	Ribosome	MRPL21	MRPL21	mitochondrial ribosomal protein L21	2.00007e-21	5.6402e-19	2.10828
PATH:03010	Ribosome	RPS29	RPS29	ribosomal protein S29	2.00007e-21	5.6402e-19	2.10828
PATH:03010	Ribosome	RPSA	RPSA	ribosomal protein SA	2.00007e-21	5.6402e-19	2.10828
PATH:03010	Ribosome	MRPL14	MRPL14	mitochondrial ribosomal protein L14	2.00007e-21	5.6402e-19	2.10828
PATH:03010	Ribosome	RPL10	RPL10	ribosomal protein L10	2.00007e-21	5.6402e-19	2.10828
PATH:03010	Ribosome	MRPL22	MRPL22	mitochondrial ribosomal protein L22	2.00007e-21	5.6402e-19	2.10828
PATH:03010	Ribosome	MRPL36	MRPL36	mitochondrial ribosomal protein L36	2.00007e-21	5.6402e-19	2.10828
PATH:03010	Ribosome	MRPL3	MRPL3	mitochondrial ribosomal protein L3	2.00007e-21	5.6402e-19	2.10828
PATH:03010	Ribosome	RPL36AL	RPL36AL	ribosomal protein L36a-like	2.00007e-21	5.6402e-19	2.10828
PATH:03010	Ribosome	RPS27A	RPS27A	ribosomal protein S27a	2.00007e-21	5.6402e-19	2.10828
PATH:03010	Ribosome	RPS24	RPS24	ribosomal protein S24	2.00007e-21	5.6402e-19	2.10828
PATH:03010	Ribosome	RPLP1	RPLP1	ribosomal protein, large, P1	2.00007e-21	5.6402e-19	2.10828
PATH:03010	Ribosome	RPL28	RPL28	ribosomal protein L28	2.00007e-21	5.6402e-19	2.10828
PATH:03010	Ribosome	RPL27	RPL27	ribosomal protein L27	2.00007e-21	5.6402e-19	2.10828
PATH:03010	Ribosome	RPL13A	RPL13A	ribosomal protein L13a	2.00007e-21	5.6402e-19	2.10828
PATH:03010	Ribosome	RPS3A	RPS3A	ribosomal protein S3A	2.00007e-21	5.6402e-19	2.10828
PATH:03010	Ribosome	RPS14	RPS14	ribosomal protein S14	2.00007e-21	5.6402e-19	2.10828
PATH:03010	Ribosome	MRPS9	MRPS9	mitochondrial ribosomal protein S9	2.00007e-21	5.6402e-19	2.10828
PATH:03010	Ribosome	RPS11	RPS11	ribosomal protein S11	2.00007e-21	5.6402e-19	2.10828
PATH:03010	Ribosome	RPS5	RPS5	ribosomal protein S5	2.00007e-21	5.6402e-19	2.10828
PATH:03010	Ribosome	RPL15	RPL15	ribosomal protein L15	2.00007e-21	5.6402e-19	2.10828
PATH:03010	Ribosome	RPS27	RPS27	ribosomal protein S27	2.00007e-21	5.6402e-19	2.10828
PATH:03010	Ribosome	MRPS2	MRPS2	mitochondrial ribosomal protein S2	2.00007e-21	5.6402e-19	2.10828
PATH:03010	Ribosome	RPS4X	RPS4X	ribosomal protein S4, X-linked	2.00007e-21	5.6402e-19	2.10828
PATH:03010	Ribosome	RPL27A	RPL27A	ribosomal protein L27a	2.00007e-21	5.6402e-19	2.10828
PATH:03010	Ribosome	RSL24D1	RSL24D1	ribosomal L24 domain containing 1	2.00007e-21	5.6402e-19	2.10828
PATH:03010	Ribosome	MRPL17	MRPL17	mitochondrial ribosomal protein L17	2.00007e-21	5.6402e-19	2.10828
PATH:03010	Ribosome	RPL8	RPL8	ribosomal protein L8	2.00007e-21	5.6402e-19	2.10828
PATH:03010	Ribosome	RPL35A	RPL35A	ribosomal protein L35a	2.00007e-21	5.6402e-19	2.10828
PATH:03010	Ribosome	MRPL24	MRPL24	mitochondrial ribosomal protein L24	2.00007e-21	5.6402e-19	2.10828
PATH:03010	Ribosome	RPL10A	RPL10A	ribosomal protein L10a	2.00007e-21	5.6402e-19	2.10828
PATH:03010	Ribosome	RPL13	RPL13	ribosomal protein L13	2.00007e-21	5.6402e-19	2.10828
PATH:03010	Ribosome	RPS7	RPS7	ribosomal protein S7	2.00007e-21	5.6402e-19	2.10828
PATH:03010	Ribosome	RPL31	RPL31	ribosomal protein L31	2.00007e-21	5.6402e-19	2.10828
PATH:03010	Ribosome	RPS13	RPS13	ribosomal protein S13	2.00007e-21	5.6402e-19	2.10828
PATH:03010	Ribosome	RPS3	RPS3	ribosomal protein S3	2.00007e-21	5.6402e-19	2.10828
PATH:03010	Ribosome	MRPL18	MRPL18	mitochondrial ribosomal protein L18	2.00007e-21	5.6402e-19	2.10828
PATH:03010	Ribosome	RPL19	RPL19	ribosomal protein L19	2.00007e-21	5.6402e-19	2.10828
PATH:03010	Ribosome	MRPL34	MRPL34	mitochondrial ribosomal protein L34	2.00007e-21	5.6402e-19	2.10828
PATH:03010	Ribosome	RPL7	RPL7	ribosomal protein L7	2.00007e-21	5.6402e-19	2.10828
PATH:03010	Ribosome	RPL14	RPL14	ribosomal protein L14	2.00007e-21	5.6402e-19	2.10828
PATH:03010	Ribosome	MRPL15	MRPL15	mitochondrial ribosomal protein L15	2.00007e-21	5.6402e-19	2.10828
PATH:03010	Ribosome	RPS20	RPS20	ribosomal protein S20	2.00007e-21	5.6402e-19	2.10828
PATH:03010	Ribosome	MRPL2	MRPL2	mitochondrial ribosomal protein L2	2.00007e-21	5.6402e-19	2.10828
PATH:03010	Ribosome	RPS21	RPS21	ribosomal protein S21	2.00007e-21	5.6402e-19	2.10828
PATH:03010	Ribosome	RPL41	RPL41	ribosomal protein L41	2.00007e-21	5.6402e-19	2.10828
PATH:01100	Metabolic pathways	PTGS1	PTGS1	prostaglandin-endoperoxide synthase 1 (prostaglandin G/H synthase and cyclooxygenase)	7.79856e-14	1.0996e-11	1.2669
PATH:01100	Metabolic pathways	REV3L	REV3L	REV3-like, polymerase (DNA directed), zeta, catalytic subunit	7.79856e-14	1.0996e-11	1.2669
PATH:01100	Metabolic pathways	GALK1	GALK1	galactokinase 1	7.79856e-14	1.0996e-11	1.2669
PATH:01100	Metabolic pathways	NAGS	NAGS	N-acetylglutamate synthase	7.79856e-14	1.0996e-11	1.2669
PATH:01100	Metabolic pathways	GOT1	GOT1	glutamic-oxaloacetic transaminase 1, soluble	7.79856e-14	1.0996e-11	1.2669
PATH:01100	Metabolic pathways	ETNK1	ETNK1	ethanolamine kinase 1	7.79856e-14	1.0996e-11	1.2669
PATH:01100	Metabolic pathways	DTYMK	DTYMK	deoxythymidylate kinase (thymidylate kinase)	7.79856e-14	1.0996e-11	1.2669
PATH:01100	Metabolic pathways	INPP1	INPP1	inositol polyphosphate-1-phosphatase	7.79856e-14	1.0996e-11	1.2669
PATH:01100	Metabolic pathways	EARS2	EARS2	glutamyl-tRNA synthetase 2, mitochondrial	7.79856e-14	1.0996e-11	1.2669
PATH:01100	Metabolic pathways	PC	PC	pyruvate carboxylase	7.79856e-14	1.0996e-11	1.2669
PATH:01100	Metabolic pathways	XYLB	XYLB	xylulokinase homolog (H. influenzae)	7.79856e-14	1.0996e-11	1.2669
PATH:01100	Metabolic pathways	STT3A	STT3A	STT3A, subunit of the oligosaccharyltransferase complex (catalytic)	7.79856e-14	1.0996e-11	1.2669
PATH:01100	Metabolic pathways	GCNT3	GCNT3	glucosaminyl (N-acetyl) transferase 3, mucin type	7.79856e-14	1.0996e-11	1.2669
PATH:01100	Metabolic pathways	ACO1	ACO1	aconitase 1, soluble	7.79856e-14	1.0996e-11	1.2669
PATH:01100	Metabolic pathways	HYAL2	HYAL2	hyaluronoglucosaminidase 2	7.79856e-14	1.0996e-11	1.2669
PATH:01100	Metabolic pathways	IDH1	IDH1	isocitrate dehydrogenase 1 (NADP+), soluble	7.79856e-14	1.0996e-11	1.2669
PATH:01100	Metabolic pathways	SYNJ2	SYNJ2	synaptojanin 2	7.79856e-14	1.0996e-11	1.2669
PATH:01100	Metabolic pathways	AMD1	AMD1	adenosylmethionine decarboxylase 1	7.79856e-14	1.0996e-11	1.2669
PATH:01100	Metabolic pathways	NT5C3B	NT5C3B	5'-nucleotidase, cytosolic IIIB	7.79856e-14	1.0996e-11	1.2669
PATH:01100	Metabolic pathways	CYP27A1	CYP27A1	cytochrome P450, family 27, subfamily A, polypeptide 1	7.79856e-14	1.0996e-11	1.2669
PATH:01100	Metabolic pathways	GART	GART	phosphoribosylglycinamide formyltransferase, phosphoribosylglycinamide synthetase, phosphoribosylaminoimidazole synthetase	7.79856e-14	1.0996e-11	1.2669
PATH:01100	Metabolic pathways	CYP2B6	CYP2B6	cytochrome P450, family 2, subfamily B, polypeptide 6	7.79856e-14	1.0996e-11	1.2669
PATH:01100	Metabolic pathways	SUCLG2	SUCLG2	succinate-CoA ligase, GDP-forming, beta subunit	7.79856e-14	1.0996e-11	1.2669
PATH:01100	Metabolic pathways	MAOA	MAOA	monoamine oxidase A	7.79856e-14	1.0996e-11	1.2669
PATH:01100	Metabolic pathways	ECHS1	ECHS1	enoyl CoA hydratase, short chain, 1, mitochondrial	7.79856e-14	1.0996e-11	1.2669
PATH:01100	Metabolic pathways	PCCB	PCCB	propionyl CoA carboxylase, beta polypeptide	7.79856e-14	1.0996e-11	1.2669
PATH:01100	Metabolic pathways	PLA2G7	PLA2G7	phospholipase A2, group VII (platelet-activating factor acetylhydrolase, plasma)	7.79856e-14	1.0996e-11	1.2669
PATH:01100	Metabolic pathways	DPAGT1	DPAGT1	dolichyl-phosphate (UDP-N-acetylglucosamine) N-acetylglucosaminephosphotransferase 1 (GlcNAc-1-P transferase)	7.79856e-14	1.0996e-11	1.2669
PATH:01100	Metabolic pathways	ASAH1	ASAH1	N-acylsphingosine amidohydrolase (acid ceramidase) 1	7.79856e-14	1.0996e-11	1.2669
PATH:01100	Metabolic pathways	MT-CO2	COX2	cytochrome c oxidase subunit II	7.79856e-14	1.0996e-11	1.2669
PATH:01100	Metabolic pathways	GPT2	GPT2	glutamic pyruvate transaminase (alanine aminotransferase) 2	7.79856e-14	1.0996e-11	1.2669
PATH:01100	Metabolic pathways	MT-ND4L	ND4L	NADH dehydrogenase, subunit 4L (complex I)	7.79856e-14	1.0996e-11	1.2669
PATH:01100	Metabolic pathways	AFMID	AFMID	arylformamidase	7.79856e-14	1.0996e-11	1.2669
PATH:01100	Metabolic pathways	ENO1	ENO1	enolase 1, (alpha)	7.79856e-14	1.0996e-11	1.2669
PATH:01100	Metabolic pathways	GPT	GPT	glutamic-pyruvate transaminase (alanine aminotransferase)	7.79856e-14	1.0996e-11	1.2669
PATH:01100	Metabolic pathways	ACOX2	ACOX2	acyl-CoA oxidase 2, branched chain	7.79856e-14	1.0996e-11	1.2669
PATH:01100	Metabolic pathways	NDUFA10	NDUFA10	NADH dehydrogenase (ubiquinone) 1 alpha subcomplex, 10, 42kDa	7.79856e-14	1.0996e-11	1.2669
PATH:01100	Metabolic pathways	HMGCR	HMGCR	3-hydroxy-3-methylglutaryl-CoA reductase	7.79856e-14	1.0996e-11	1.2669
PATH:01100	Metabolic pathways	ATP6V1G1	ATP6V1G1	ATPase, H+ transporting, lysosomal 13kDa, V1 subunit G1	7.79856e-14	1.0996e-11	1.2669
PATH:01100	Metabolic pathways	ASL	ASL	argininosuccinate lyase	7.79856e-14	1.0996e-11	1.2669
PATH:01100	Metabolic pathways	PGAM2	PGAM2	phosphoglycerate mutase 2 (muscle)	7.79856e-14	1.0996e-11	1.2669
PATH:01100	Metabolic pathways	HADH	HADH	hydroxyacyl-CoA dehydrogenase	7.79856e-14	1.0996e-11	1.2669
PATH:01100	Metabolic pathways	CRYL1	CRYL1	crystallin, lambda 1	7.79856e-14	1.0996e-11	1.2669
PATH:01100	Metabolic pathways	PIGQ	PIGQ	phosphatidylinositol glycan anchor biosynthesis, class Q	7.79856e-14	1.0996e-11	1.2669
PATH:01100	Metabolic pathways	UCK1	UCK1	uridine-cytidine kinase 1	7.79856e-14	1.0996e-11	1.2669
PATH:01100	Metabolic pathways	COMT	COMT	catechol-O-methyltransferase	7.79856e-14	1.0996e-11	1.2669
PATH:01100	Metabolic pathways	COX7B	COX7B	cytochrome c oxidase subunit VIIb	7.79856e-14	1.0996e-11	1.2669
PATH:01100	Metabolic pathways	MGLL	MGLL	monoglyceride lipase	7.79856e-14	1.0996e-11	1.2669
PATH:01100	Metabolic pathways	ACAA1	ACAA1	acetyl-CoA acyltransferase 1	7.79856e-14	1.0996e-11	1.2669
PATH:01100	Metabolic pathways	ST6GAL1	ST6GAL1	ST6 beta-galactosamide alpha-2,6-sialyltranferase 1	7.79856e-14	1.0996e-11	1.2669
PATH:01100	Metabolic pathways	CHPF2	CHPF2	chondroitin polymerizing factor 2	7.79856e-14	1.0996e-11	1.2669
PATH:01100	Metabolic pathways	SPTLC2	SPTLC2	serine palmitoyltransferase, long chain base subunit 2	7.79856e-14	1.0996e-11	1.2669
PATH:01100	Metabolic pathways	ACMSD	ACMSD	aminocarboxymuconate semialdehyde decarboxylase	7.79856e-14	1.0996e-11	1.2669
PATH:01100	Metabolic pathways	B4GALT4	B4GALT4	UDP-Gal:betaGlcNAc beta 1,4- galactosyltransferase, polypeptide 4	7.79856e-14	1.0996e-11	1.2669
PATH:01100	Metabolic pathways	B4GALT6	B4GALT6	UDP-Gal:betaGlcNAc beta 1,4- galactosyltransferase, polypeptide 6	7.79856e-14	1.0996e-11	1.2669
PATH:01100	Metabolic pathways	PSPH	PSPH	phosphoserine phosphatase	7.79856e-14	1.0996e-11	1.2669
PATH:01100	Metabolic pathways	CHKB	CHKB	choline kinase beta	7.79856e-14	1.0996e-11	1.2669
PATH:01100	Metabolic pathways	QDPR	QDPR	quinoid dihydropteridine reductase	7.79856e-14	1.0996e-11	1.2669
PATH:01100	Metabolic pathways	HSD17B4	HSD17B4	hydroxysteroid (17-beta) dehydrogenase 4	7.79856e-14	1.0996e-11	1.2669
PATH:01100	Metabolic pathways	GAD1	GAD1	glutamate decarboxylase 1 (brain, 67kDa)	7.79856e-14	1.0996e-11	1.2669
PATH:01100	Metabolic pathways	TST	TST	thiosulfate sulfurtransferase (rhodanese)	7.79856e-14	1.0996e-11	1.2669
PATH:01100	Metabolic pathways	MTM1	MTM1	myotubularin 1	7.79856e-14	1.0996e-11	1.2669
PATH:01100	Metabolic pathways	INPPL1	INPPL1	inositol polyphosphate phosphatase-like 1	7.79856e-14	1.0996e-11	1.2669
PATH:01100	Metabolic pathways	SAT2	SAT2	spermidine/spermine N1-acetyltransferase family member 2	7.79856e-14	1.0996e-11	1.2669
PATH:01100	Metabolic pathways	CHPF	CHPF	chondroitin polymerizing factor	7.79856e-14	1.0996e-11	1.2669
PATH:01100	Metabolic pathways	NDUFS4	NDUFS4	NADH dehydrogenase (ubiquinone) Fe-S protein 4, 18kDa (NADH-coenzyme Q reductase)	7.79856e-14	1.0996e-11	1.2669
PATH:01100	Metabolic pathways	GALNT1	GALNT1	polypeptide N-acetylgalactosaminyltransferase 1	7.79856e-14	1.0996e-11	1.2669
PATH:01100	Metabolic pathways	FLAD1	FLAD1	flavin adenine dinucleotide synthetase 1	7.79856e-14	1.0996e-11	1.2669
PATH:01100	Metabolic pathways	DAD1	DAD1	defender against cell death 1	7.79856e-14	1.0996e-11	1.2669
PATH:01100	Metabolic pathways	ALDH1A1	ALDH1A1	aldehyde dehydrogenase 1 family, member A1	7.79856e-14	1.0996e-11	1.2669
PATH:01100	Metabolic pathways	PAH	PAH	phenylalanine hydroxylase	7.79856e-14	1.0996e-11	1.2669
PATH:01100	Metabolic pathways	LPIN3	LPIN3	lipin 3	7.79856e-14	1.0996e-11	1.2669
PATH:01100	Metabolic pathways	LIAS	LIAS	lipoic acid synthetase	7.79856e-14	1.0996e-11	1.2669
PATH:01100	Metabolic pathways	HIBCH	HIBCH	3-hydroxyisobutyryl-CoA hydrolase	7.79856e-14	1.0996e-11	1.2669
PATH:01100	Metabolic pathways	PDHA1	PDHA1	pyruvate dehydrogenase (lipoamide) alpha 1	7.79856e-14	1.0996e-11	1.2669
PATH:01100	Metabolic pathways	INPP4A	INPP4A	inositol polyphosphate-4-phosphatase, type I, 107kDa	7.79856e-14	1.0996e-11	1.2669
PATH:01100	Metabolic pathways	GBA3	GBA3	glucosidase, beta, acid 3 (gene/pseudogene)	7.79856e-14	1.0996e-11	1.2669
PATH:01100	Metabolic pathways	LPIN1	LPIN1	lipin 1	7.79856e-14	1.0996e-11	1.2669
PATH:01100	Metabolic pathways	FASN	FASN	fatty acid synthase	7.79856e-14	1.0996e-11	1.2669
PATH:01100	Metabolic pathways	CBR1	CBR1	carbonyl reductase 1	7.79856e-14	1.0996e-11	1.2669
PATH:01100	Metabolic pathways	POLR2F	POLR2F	polymerase (RNA) II (DNA directed) polypeptide F	7.79856e-14	1.0996e-11	1.2669
PATH:01100	Metabolic pathways	PTGES3	PTGES3	prostaglandin E synthase 3 (cytosolic)	7.79856e-14	1.0996e-11	1.2669
PATH:01100	Metabolic pathways	DHODH	DHODH	dihydroorotate dehydrogenase (quinone)	7.79856e-14	1.0996e-11	1.2669
PATH:01100	Metabolic pathways	ACSM2A	ACSM2A	acyl-CoA synthetase medium-chain family member 2A	7.79856e-14	1.0996e-11	1.2669
PATH:01100	Metabolic pathways	HYAL3	HYAL3	hyaluronoglucosaminidase 3	7.79856e-14	1.0996e-11	1.2669
PATH:01100	Metabolic pathways	POLR2C	POLR2C	polymerase (RNA) II (DNA directed) polypeptide C, 33kDa	7.79856e-14	1.0996e-11	1.2669
PATH:01100	Metabolic pathways	PGD	PGD	phosphogluconate dehydrogenase	7.79856e-14	1.0996e-11	1.2669
PATH:01100	Metabolic pathways	KDSR	KDSR	3-ketodihydrosphingosine reductase	7.79856e-14	1.0996e-11	1.2669
PATH:01100	Metabolic pathways	PLD2	PLD2	phospholipase D2	7.79856e-14	1.0996e-11	1.2669
PATH:01100	Metabolic pathways	FAH	FAH	fumarylacetoacetate hydrolase (fumarylacetoacetase)	7.79856e-14	1.0996e-11	1.2669
PATH:01100	Metabolic pathways	NDUFV2	NDUFV2	NADH dehydrogenase (ubiquinone) flavoprotein 2, 24kDa	7.79856e-14	1.0996e-11	1.2669
PATH:01100	Metabolic pathways	ACSL5	ACSL5	acyl-CoA synthetase long-chain family member 5	7.79856e-14	1.0996e-11	1.2669
PATH:01100	Metabolic pathways	RRM1	RRM1	ribonucleotide reductase M1	7.79856e-14	1.0996e-11	1.2669
PATH:01100	Metabolic pathways	PCYT2	PCYT2	phosphate cytidylyltransferase 2, ethanolamine	7.79856e-14	1.0996e-11	1.2669
PATH:01100	Metabolic pathways	HSD17B7	HSD17B7	hydroxysteroid (17-beta) dehydrogenase 7	7.79856e-14	1.0996e-11	1.2669
PATH:01100	Metabolic pathways	AKR1A1	AKR1A1	aldo-keto reductase family 1, member A1 (aldehyde reductase)	7.79856e-14	1.0996e-11	1.2669
PATH:01100	Metabolic pathways	ATP6V1H	ATP6V1H	ATPase, H+ transporting, lysosomal 50/57kDa, V1 subunit H	7.79856e-14	1.0996e-11	1.2669
PATH:01100	Metabolic pathways	HPSE2	HPSE2	heparanase 2 (inactive)	7.79856e-14	1.0996e-11	1.2669
PATH:01100	Metabolic pathways	POLR1E	POLR1E	polymerase (RNA) I polypeptide E, 53kDa	7.79856e-14	1.0996e-11	1.2669
PATH:01100	Metabolic pathways	MAN1A1	MAN1A1	mannosidase, alpha, class 1A, member 1	7.79856e-14	1.0996e-11	1.2669
PATH:01100	Metabolic pathways	ADH5	ADH5	alcohol dehydrogenase 5 (class III), chi polypeptide	7.79856e-14	1.0996e-11	1.2669
PATH:01100	Metabolic pathways	ACOX1	ACOX1	acyl-CoA oxidase 1, palmitoyl	7.79856e-14	1.0996e-11	1.2669
PATH:01100	Metabolic pathways	IDUA	IDUA	iduronidase, alpha-L-	7.79856e-14	1.0996e-11	1.2669
PATH:01100	Metabolic pathways	ST3GAL6	ST3GAL6	ST3 beta-galactoside alpha-2,3-sialyltransferase 6	7.79856e-14	1.0996e-11	1.2669
PATH:01100	Metabolic pathways	CKB	CKB	creatine kinase, brain	7.79856e-14	1.0996e-11	1.2669
PATH:01100	Metabolic pathways	NDUFS6	NDUFS6	NADH dehydrogenase (ubiquinone) Fe-S protein 6, 13kDa (NADH-coenzyme Q reductase)	7.79856e-14	1.0996e-11	1.2669
PATH:01100	Metabolic pathways	EPHX2	EPHX2	epoxide hydrolase 2, cytoplasmic	7.79856e-14	1.0996e-11	1.2669
PATH:01100	Metabolic pathways	DMGDH	DMGDH	dimethylglycine dehydrogenase	7.79856e-14	1.0996e-11	1.2669
PATH:01100	Metabolic pathways	AGPS	AGPS	alkylglycerone phosphate synthase	7.79856e-14	1.0996e-11	1.2669
PATH:01100	Metabolic pathways	SHMT2	SHMT2	serine hydroxymethyltransferase 2 (mitochondrial)	7.79856e-14	1.0996e-11	1.2669
PATH:01100	Metabolic pathways	HMBS	HMBS	hydroxymethylbilane synthase	7.79856e-14	1.0996e-11	1.2669
PATH:01100	Metabolic pathways	PFKM	PFKM	phosphofructokinase, muscle	7.79856e-14	1.0996e-11	1.2669
PATH:01100	Metabolic pathways	CMPK1	CMPK1	cytidine monophosphate (UMP-CMP) kinase 1, cytosolic	7.79856e-14	1.0996e-11	1.2669
PATH:01100	Metabolic pathways	GALE	GALE	UDP-galactose-4-epimerase	7.79856e-14	1.0996e-11	1.2669
PATH:01100	Metabolic pathways	GNPDA1	GNPDA1	glucosamine-6-phosphate deaminase 1	7.79856e-14	1.0996e-11	1.2669
PATH:01100	Metabolic pathways	B4GALT1	B4GALT1	UDP-Gal:betaGlcNAc beta 1,4- galactosyltransferase, polypeptide 1	7.79856e-14	1.0996e-11	1.2669
PATH:01100	Metabolic pathways	GUSB	GUSB	glucuronidase, beta	7.79856e-14	1.0996e-11	1.2669
PATH:01100	Metabolic pathways	ACSL3	ACSL3	acyl-CoA synthetase long-chain family member 3	7.79856e-14	1.0996e-11	1.2669
PATH:01100	Metabolic pathways	ODC1	ODC1	ornithine decarboxylase 1	7.79856e-14	1.0996e-11	1.2669
PATH:01100	Metabolic pathways	ACADVL	ACADVL	acyl-CoA dehydrogenase, very long chain	7.79856e-14	1.0996e-11	1.2669
PATH:01100	Metabolic pathways	DCK	DCK	deoxycytidine kinase	7.79856e-14	1.0996e-11	1.2669
PATH:01100	Metabolic pathways	OGDHL	OGDHL	oxoglutarate dehydrogenase-like	7.79856e-14	1.0996e-11	1.2669
PATH:01100	Metabolic pathways	FAXDC2	FAXDC2	fatty acid hydroxylase domain containing 2	7.79856e-14	1.0996e-11	1.2669
PATH:01100	Metabolic pathways	NDUFB7	NDUFB7	NADH dehydrogenase (ubiquinone) 1 beta subcomplex, 7, 18kDa	7.79856e-14	1.0996e-11	1.2669
PATH:01100	Metabolic pathways	SMPD1	SMPD1	sphingomyelin phosphodiesterase 1, acid lysosomal	7.79856e-14	1.0996e-11	1.2669
PATH:01100	Metabolic pathways	GLUD1	GLUD1	glutamate dehydrogenase 1	7.79856e-14	1.0996e-11	1.2669
PATH:01100	Metabolic pathways	HGSNAT	HGSNAT	heparan-alpha-glucosaminide N-acetyltransferase	7.79856e-14	1.0996e-11	1.2669
PATH:01100	Metabolic pathways	GALT	GALT	galactose-1-phosphate uridylyltransferase	7.79856e-14	1.0996e-11	1.2669
PATH:01100	Metabolic pathways	CHSY1	CHSY1	chondroitin sulfate synthase 1	7.79856e-14	1.0996e-11	1.2669
PATH:01100	Metabolic pathways	MTAP	MTAP	methylthioadenosine phosphorylase	7.79856e-14	1.0996e-11	1.2669
PATH:01100	Metabolic pathways	CPOX	CPOX	coproporphyrinogen oxidase	7.79856e-14	1.0996e-11	1.2669
PATH:01100	Metabolic pathways	AGXT	AGXT	alanine-glyoxylate aminotransferase	7.79856e-14	1.0996e-11	1.2669
PATH:01100	Metabolic pathways	MMAB	MMAB	methylmalonic aciduria (cobalamin deficiency) cblB type	7.79856e-14	1.0996e-11	1.2669
PATH:01100	Metabolic pathways	NDUFA4	NDUFA4	NDUFA4, mitochondrial complex associated	7.79856e-14	1.0996e-11	1.2669
PATH:01100	Metabolic pathways	ACSM1	ACSM1	acyl-CoA synthetase medium-chain family member 1	7.79856e-14	1.0996e-11	1.2669
PATH:01100	Metabolic pathways	PLCE1	PLCE1	phospholipase C, epsilon 1	7.79856e-14	1.0996e-11	1.2669
PATH:01100	Metabolic pathways	ACSM2B	ACSM2B	acyl-CoA synthetase medium-chain family member 2B	7.79856e-14	1.0996e-11	1.2669
PATH:01100	Metabolic pathways	AK4	AK4	adenylate kinase 4	7.79856e-14	1.0996e-11	1.2669
PATH:01100	Metabolic pathways	SGMS2	SGMS2	sphingomyelin synthase 2	7.79856e-14	1.0996e-11	1.2669
PATH:01100	Metabolic pathways	C1GALT1	C1GALT1	core 1 synthase, glycoprotein-N-acetylgalactosamine 3-beta-galactosyltransferase 1	7.79856e-14	1.0996e-11	1.2669
PATH:01100	Metabolic pathways	GLYCTK	GLYCTK	glycerate kinase	7.79856e-14	1.0996e-11	1.2669
PATH:01100	Metabolic pathways	PAPSS1	PAPSS1	3'-phosphoadenosine 5'-phosphosulfate synthase 1	7.79856e-14	1.0996e-11	1.2669
PATH:01100	Metabolic pathways	POLR1D	POLR1D	polymerase (RNA) I polypeptide D, 16kDa	7.79856e-14	1.0996e-11	1.2669
PATH:01100	Metabolic pathways	PON3	PON3	paraoxonase 3	7.79856e-14	1.0996e-11	1.2669
PATH:01100	Metabolic pathways	PANK2	PANK2	pantothenate kinase 2	7.79856e-14	1.0996e-11	1.2669
PATH:01100	Metabolic pathways	PMM2	PMM2	phosphomannomutase 2	7.79856e-14	1.0996e-11	1.2669
PATH:01100	Metabolic pathways	SYNJ1	SYNJ1	synaptojanin 1	7.79856e-14	1.0996e-11	1.2669
PATH:01100	Metabolic pathways	MT-ND2	ND2	MTND2	7.79856e-14	1.0996e-11	1.2669
PATH:01100	Metabolic pathways	CTH	CTH	cystathionine gamma-lyase	7.79856e-14	1.0996e-11	1.2669
PATH:01100	Metabolic pathways	ALDH18A1	ALDH18A1	aldehyde dehydrogenase 18 family, member A1	7.79856e-14	1.0996e-11	1.2669
PATH:01100	Metabolic pathways	FDPS	FDPS	farnesyl diphosphate synthase	7.79856e-14	1.0996e-11	1.2669
PATH:01100	Metabolic pathways	COX11	COX11	cytochrome c oxidase assembly homolog 11 (yeast)	7.79856e-14	1.0996e-11	1.2669
PATH:01100	Metabolic pathways	KYNU	KYNU	kynureninase	7.79856e-14	1.0996e-11	1.2669
PATH:01100	Metabolic pathways	DGKH	DGKH	diacylglycerol kinase, eta	7.79856e-14	1.0996e-11	1.2669
PATH:01100	Metabolic pathways	ALG3	ALG3	ALG3, alpha-1,3- mannosyltransferase	7.79856e-14	1.0996e-11	1.2669
PATH:01100	Metabolic pathways	AMPD2	AMPD2	adenosine monophosphate deaminase 2	7.79856e-14	1.0996e-11	1.2669
PATH:01100	Metabolic pathways	MOCS1	MOCS1	molybdenum cofactor synthesis 1	7.79856e-14	1.0996e-11	1.2669
PATH:01100	Metabolic pathways	ALG8	ALG8	ALG8, alpha-1,3-glucosyltransferase	7.79856e-14	1.0996e-11	1.2669
PATH:01100	Metabolic pathways	AMDHD1	AMDHD1	amidohydrolase domain containing 1	7.79856e-14	1.0996e-11	1.2669
PATH:01100	Metabolic pathways	RPN1	RPN1	ribophorin I	7.79856e-14	1.0996e-11	1.2669
PATH:01100	Metabolic pathways	AC093512.2	ALDOA	aldolase A, fructose-bisphosphate	7.79856e-14	1.0996e-11	1.2669
PATH:01100	Metabolic pathways	POLE3	POLE3	polymerase (DNA directed), epsilon 3, accessory subunit	7.79856e-14	1.0996e-11	1.2669
PATH:01100	Metabolic pathways	MTHFD1L	MTHFD1L	methylenetetrahydrofolate dehydrogenase (NADP+ dependent) 1-like	7.79856e-14	1.0996e-11	1.2669
PATH:01100	Metabolic pathways	LAP3	LAP3	leucine aminopeptidase 3	7.79856e-14	1.0996e-11	1.2669
PATH:01100	Metabolic pathways	ACSM3	ACSM3	acyl-CoA synthetase medium-chain family member 3	7.79856e-14	1.0996e-11	1.2669
PATH:01100	Metabolic pathways	PLA2G4A	PLA2G4A	phospholipase A2, group IVA (cytosolic, calcium-dependent)	7.79856e-14	1.0996e-11	1.2669
PATH:01100	Metabolic pathways	SARDH	SARDH	sarcosine dehydrogenase	7.79856e-14	1.0996e-11	1.2669
PATH:01100	Metabolic pathways	PGP	PGP	phosphoglycolate phosphatase	7.79856e-14	1.0996e-11	1.2669
PATH:01100	Metabolic pathways	SPTLC3	SPTLC3	serine palmitoyltransferase, long chain base subunit 3	7.79856e-14	1.0996e-11	1.2669
PATH:01100	Metabolic pathways	NDUFB9	NDUFB9	NADH dehydrogenase (ubiquinone) 1 beta subcomplex, 9, 22kDa	7.79856e-14	1.0996e-11	1.2669
PATH:01100	Metabolic pathways	RDH11	RDH11	retinol dehydrogenase 11 (all-trans/9-cis/11-cis)	7.79856e-14	1.0996e-11	1.2669
PATH:01100	Metabolic pathways	ACSS3	ACSS3	acyl-CoA synthetase short-chain family member 3	7.79856e-14	1.0996e-11	1.2669
PATH:01100	Metabolic pathways	SDHA	SDHA	succinate dehydrogenase complex, subunit A, flavoprotein (Fp)	7.79856e-14	1.0996e-11	1.2669
PATH:01100	Metabolic pathways	HLCS	HLCS	holocarboxylase synthetase (biotin-(proprionyl-CoA-carboxylase (ATP-hydrolysing)) ligase)	7.79856e-14	1.0996e-11	1.2669
PATH:01100	Metabolic pathways	IMPAD1	IMPAD1	inositol monophosphatase domain containing 1	7.79856e-14	1.0996e-11	1.2669
PATH:01100	Metabolic pathways	PANK1	PANK1	pantothenate kinase 1	7.79856e-14	1.0996e-11	1.2669
PATH:01100	Metabolic pathways	AGL	AGL	amylo-alpha-1, 6-glucosidase, 4-alpha-glucanotransferase	7.79856e-14	1.0996e-11	1.2669
PATH:01100	Metabolic pathways	KHK	KHK	ketohexokinase (fructokinase)	7.79856e-14	1.0996e-11	1.2669
PATH:01100	Metabolic pathways	ME3	ME3	malic enzyme 3, NADP(+)-dependent, mitochondrial	7.79856e-14	1.0996e-11	1.2669
PATH:01100	Metabolic pathways	PIGS	PIGS	phosphatidylinositol glycan anchor biosynthesis, class S	7.79856e-14	1.0996e-11	1.2669
PATH:01100	Metabolic pathways	GDA	GDA	guanine deaminase	7.79856e-14	1.0996e-11	1.2669
PATH:01100	Metabolic pathways	UROC1	UROC1	urocanate hydratase 1	7.79856e-14	1.0996e-11	1.2669
PATH:01100	Metabolic pathways	DLD	DLD	dihydrolipoamide dehydrogenase	7.79856e-14	1.0996e-11	1.2669
PATH:01100	Metabolic pathways	NDST1	NDST1	N-deacetylase/N-sulfotransferase (heparan glucosaminyl) 1	7.79856e-14	1.0996e-11	1.2669
PATH:01100	Metabolic pathways	FAHD1	FAHD1	fumarylacetoacetate hydrolase domain containing 1	7.79856e-14	1.0996e-11	1.2669
PATH:01100	Metabolic pathways	CSGALNACT2	CSGALNACT2	chondroitin sulfate N-acetylgalactosaminyltransferase 2	7.79856e-14	1.0996e-11	1.2669
PATH:01100	Metabolic pathways	CYP2U1	CYP2U1	cytochrome P450, family 2, subfamily U, polypeptide 1	7.79856e-14	1.0996e-11	1.2669
PATH:01100	Metabolic pathways	UAP1	UAP1	UDP-N-acetylglucosamine pyrophosphorylase 1	7.79856e-14	1.0996e-11	1.2669
PATH:01100	Metabolic pathways	PMVK	PMVK	phosphomevalonate kinase	7.79856e-14	1.0996e-11	1.2669
PATH:01100	Metabolic pathways	EPRS	EPRS	glutamyl-prolyl-tRNA synthetase	7.79856e-14	1.0996e-11	1.2669
PATH:01100	Metabolic pathways	PON2	PON2	paraoxonase 2	7.79856e-14	1.0996e-11	1.2669
PATH:01100	Metabolic pathways	ACSL4	ACSL4	acyl-CoA synthetase long-chain family member 4	7.79856e-14	1.0996e-11	1.2669
PATH:01100	Metabolic pathways	PIGM	PIGM	phosphatidylinositol glycan anchor biosynthesis, class M	7.79856e-14	1.0996e-11	1.2669
PATH:01100	Metabolic pathways	CHPT1	CHPT1	choline phosphotransferase 1	7.79856e-14	1.0996e-11	1.2669
PATH:01100	Metabolic pathways	ADH4	ADH4	alcohol dehydrogenase 4 (class II), pi polypeptide	7.79856e-14	1.0996e-11	1.2669
PATH:01100	Metabolic pathways	FH	FH	fumarate hydratase	7.79856e-14	1.0996e-11	1.2669
PATH:01100	Metabolic pathways	DGKA	DGKA	diacylglycerol kinase, alpha 80kDa	7.79856e-14	1.0996e-11	1.2669
PATH:01100	Metabolic pathways	MPST	MPST	mercaptopyruvate sulfurtransferase	7.79856e-14	1.0996e-11	1.2669
PATH:01100	Metabolic pathways	SDHC	SDHC	succinate dehydrogenase complex, subunit C, integral membrane protein, 15kDa	7.79856e-14	1.0996e-11	1.2669
PATH:01100	Metabolic pathways	DNMT3B	DNMT3B	DNA (cytosine-5-)-methyltransferase 3 beta	7.79856e-14	1.0996e-11	1.2669
PATH:01100	Metabolic pathways	GPI	GPI	glucose-6-phosphate isomerase	7.79856e-14	1.0996e-11	1.2669
PATH:01100	Metabolic pathways	CYP4F3	CYP4F3	cytochrome P450, family 4, subfamily F, polypeptide 3	7.79856e-14	1.0996e-11	1.2669
PATH:01100	Metabolic pathways	COX17	COX17	COX17 cytochrome c oxidase copper chaperone	7.79856e-14	1.0996e-11	1.2669
PATH:01100	Metabolic pathways	ATP6V1A	ATP6V1A	ATPase, H+ transporting, lysosomal 70kDa, V1 subunit A	7.79856e-14	1.0996e-11	1.2669
PATH:01100	Metabolic pathways	XYLT2	XYLT2	xylosyltransferase II	7.79856e-14	1.0996e-11	1.2669
PATH:01100	Metabolic pathways	GGT1	GGT1	gamma-glutamyltransferase 1	7.79856e-14	1.0996e-11	1.2669
PATH:01100	Metabolic pathways	MT-ATP6	ATP6	ATP synthase F0 subunit 6	7.79856e-14	1.0996e-11	1.2669
PATH:01100	Metabolic pathways	ENPP7	ENPP7	ectonucleotide pyrophosphatase/phosphodiesterase 7	7.79856e-14	1.0996e-11	1.2669
PATH:01100	Metabolic pathways	ALG5	ALG5	ALG5, dolichyl-phosphate beta-glucosyltransferase	7.79856e-14	1.0996e-11	1.2669
PATH:01100	Metabolic pathways	AKR1B1	AKR1B1	aldo-keto reductase family 1, member B1 (aldose reductase)	7.79856e-14	1.0996e-11	1.2669
PATH:01100	Metabolic pathways	BHMT	BHMT	betaine--homocysteine S-methyltransferase	7.79856e-14	1.0996e-11	1.2669
PATH:01100	Metabolic pathways	NME4	NME4	NME/NM23 nucleoside diphosphate kinase 4	7.79856e-14	1.0996e-11	1.2669
PATH:01100	Metabolic pathways	SEPHS2	SEPHS2	selenophosphate synthetase 2	7.79856e-14	1.0996e-11	1.2669
PATH:01100	Metabolic pathways	GCNT1	GCNT1	glucosaminyl (N-acetyl) transferase 1, core 2	7.79856e-14	1.0996e-11	1.2669
PATH:01100	Metabolic pathways	UGT8	UGT8	UDP glycosyltransferase 8	7.79856e-14	1.0996e-11	1.2669
PATH:01100	Metabolic pathways	GCDH	GCDH	glutaryl-CoA dehydrogenase	7.79856e-14	1.0996e-11	1.2669
PATH:01100	Metabolic pathways	PLA2G12B	PLA2G12B	phospholipase A2, group XIIB	7.79856e-14	1.0996e-11	1.2669
PATH:01100	Metabolic pathways	CYP51A1	CYP51A1	cytochrome P450, family 51, subfamily A, polypeptide 1	7.79856e-14	1.0996e-11	1.2669
PATH:01100	Metabolic pathways	MAOB	MAOB	monoamine oxidase B	7.79856e-14	1.0996e-11	1.2669
PATH:01100	Metabolic pathways	CERS2	CERS2	ceramide synthase 2	7.79856e-14	1.0996e-11	1.2669
PATH:01100	Metabolic pathways	NME1	NME1	NME/NM23 nucleoside diphosphate kinase 1	7.79856e-14	1.0996e-11	1.2669
PATH:01100	Metabolic pathways	GMDS	GMDS	GDP-mannose 4,6-dehydratase	7.79856e-14	1.0996e-11	1.2669
PATH:01100	Metabolic pathways	ATP6V0E2	ATP6V0E2	ATPase, H+ transporting V0 subunit e2	7.79856e-14	1.0996e-11	1.2669
PATH:01100	Metabolic pathways	UQCR10	UQCR10	ubiquinol-cytochrome c reductase, complex III subunit X	7.79856e-14	1.0996e-11	1.2669
PATH:01100	Metabolic pathways	ACAT2	ACAT2	acetyl-CoA acetyltransferase 2	7.79856e-14	1.0996e-11	1.2669
PATH:01100	Metabolic pathways	NSDHL	NSDHL	NAD(P) dependent steroid dehydrogenase-like	7.79856e-14	1.0996e-11	1.2669
PATH:01100	Metabolic pathways	B4GALNT1	B4GALNT1	beta-1,4-N-acetyl-galactosaminyl transferase 1	7.79856e-14	1.0996e-11	1.2669
PATH:01100	Metabolic pathways	NDUFA13	NDUFA13	NADH dehydrogenase (ubiquinone) 1 alpha subcomplex, 13	7.79856e-14	1.0996e-11	1.2669
PATH:01100	Metabolic pathways	DLST	DLST	dihydrolipoamide S-succinyltransferase (E2 component of 2-oxo-glutarate complex)	7.79856e-14	1.0996e-11	1.2669
PATH:01100	Metabolic pathways	ACADSB	ACADSB	acyl-CoA dehydrogenase, short/branched chain	7.79856e-14	1.0996e-11	1.2669
PATH:01100	Metabolic pathways	ENO3	ENO3	enolase 3 (beta, muscle)	7.79856e-14	1.0996e-11	1.2669
PATH:01100	Metabolic pathways	CNDP2	CNDP2	CNDP dipeptidase 2 (metallopeptidase M20 family)	7.79856e-14	1.0996e-11	1.2669
PATH:01100	Metabolic pathways	TCIRG1	TCIRG1	T-cell, immune regulator 1, ATPase, H+ transporting, lysosomal V0 subunit A3	7.79856e-14	1.0996e-11	1.2669
PATH:01100	Metabolic pathways	MVK	MVK	mevalonate kinase	7.79856e-14	1.0996e-11	1.2669
PATH:01100	Metabolic pathways	MAT1A	MAT1A	methionine adenosyltransferase I, alpha	7.79856e-14	1.0996e-11	1.2669
PATH:01100	Metabolic pathways	HPD	HPD	4-hydroxyphenylpyruvate dioxygenase	7.79856e-14	1.0996e-11	1.2669
PATH:01100	Metabolic pathways	ALAS1	ALAS1	aminolevulinate, delta-, synthase 1	7.79856e-14	1.0996e-11	1.2669
PATH:01100	Metabolic pathways	ACSS2	ACSS2	acyl-CoA synthetase short-chain family member 2	7.79856e-14	1.0996e-11	1.2669
PATH:01100	Metabolic pathways	INPP5J	INPP5J	inositol polyphosphate-5-phosphatase J	7.79856e-14	1.0996e-11	1.2669
PATH:01100	Metabolic pathways	GLDC	GLDC	glycine dehydrogenase (decarboxylating)	7.79856e-14	1.0996e-11	1.2669
PATH:01100	Metabolic pathways	MOGAT3	MOGAT3	monoacylglycerol O-acyltransferase 3	7.79856e-14	1.0996e-11	1.2669
PATH:01100	Metabolic pathways	MDH2	MDH2	malate dehydrogenase 2, NAD (mitochondrial)	7.79856e-14	1.0996e-11	1.2669
PATH:01100	Metabolic pathways	IMPDH2	IMPDH2	IMP (inosine 5'-monophosphate) dehydrogenase 2	7.79856e-14	1.0996e-11	1.2669
PATH:01100	Metabolic pathways	INPP5K	INPP5K	inositol polyphosphate-5-phosphatase K	7.79856e-14	1.0996e-11	1.2669
PATH:01100	Metabolic pathways	GRHPR	GRHPR	glyoxylate reductase/hydroxypyruvate reductase	7.79856e-14	1.0996e-11	1.2669
PATH:01100	Metabolic pathways	ALDH4A1	ALDH4A1	aldehyde dehydrogenase 4 family, member A1	7.79856e-14	1.0996e-11	1.2669
PATH:01100	Metabolic pathways	NDUFA12	NDUFA12	NADH dehydrogenase (ubiquinone) 1 alpha subcomplex, 12	7.79856e-14	1.0996e-11	1.2669
PATH:01100	Metabolic pathways	GAPDH	GAPDH	glyceraldehyde-3-phosphate dehydrogenase	7.79856e-14	1.0996e-11	1.2669
PATH:01100	Metabolic pathways	MCAT	MCAT	malonyl CoA:ACP acyltransferase (mitochondrial)	7.79856e-14	1.0996e-11	1.2669
PATH:01100	Metabolic pathways	UXS1	UXS1	UDP-glucuronate decarboxylase 1	7.79856e-14	1.0996e-11	1.2669
PATH:01100	Metabolic pathways	EHHADH	EHHADH	enoyl-CoA, hydratase/3-hydroxyacyl CoA dehydrogenase	7.79856e-14	1.0996e-11	1.2669
PATH:01100	Metabolic pathways	ARG1	ARG1	arginase 1	7.79856e-14	1.0996e-11	1.2669
PATH:01100	Metabolic pathways	GALNT5	GALNT5	polypeptide N-acetylgalactosaminyltransferase 5	7.79856e-14	1.0996e-11	1.2669
PATH:01100	Metabolic pathways	DHCR24	DHCR24	24-dehydrocholesterol reductase	7.79856e-14	1.0996e-11	1.2669
PATH:01100	Metabolic pathways	POLR2E	POLR2E	polymerase (RNA) II (DNA directed) polypeptide E, 25kDa	7.79856e-14	1.0996e-11	1.2669
PATH:01100	Metabolic pathways	INPP5A	INPP5A	inositol polyphosphate-5-phosphatase, 40kDa	7.79856e-14	1.0996e-11	1.2669
PATH:01100	Metabolic pathways	CD38	CD38	CD38 molecule	7.79856e-14	1.0996e-11	1.2669
PATH:01100	Metabolic pathways	PLCD1	PLCD1	phospholipase C, delta 1	7.79856e-14	1.0996e-11	1.2669
PATH:01100	Metabolic pathways	ACO2	ACO2	aconitase 2, mitochondrial	7.79856e-14	1.0996e-11	1.2669
PATH:01100	Metabolic pathways	ATP6AP1	ATP6AP1	ATPase, H+ transporting, lysosomal accessory protein 1	7.79856e-14	1.0996e-11	1.2669
PATH:01100	Metabolic pathways	LTA4H	LTA4H	leukotriene A4 hydrolase	7.79856e-14	1.0996e-11	1.2669
PATH:01100	Metabolic pathways	ISYNA1	ISYNA1	inositol-3-phosphate synthase 1	7.79856e-14	1.0996e-11	1.2669
PATH:01100	Metabolic pathways	B3GALNT1	B3GALNT1	beta-1,3-N-acetylgalactosaminyltransferase 1 (globoside blood group)	7.79856e-14	1.0996e-11	1.2669
PATH:01100	Metabolic pathways	CERS6	CERS6	ceramide synthase 6	7.79856e-14	1.0996e-11	1.2669
PATH:01100	Metabolic pathways	POLR2J3	POLR2J3	polymerase (RNA) II (DNA directed) polypeptide J3	7.79856e-14	1.0996e-11	1.2669
PATH:01100	Metabolic pathways	TALDO1	TALDO1	transaldolase 1	7.79856e-14	1.0996e-11	1.2669
PATH:01100	Metabolic pathways	PNPLA3	PNPLA3	patatin-like phospholipase domain containing 3	7.79856e-14	1.0996e-11	1.2669
PATH:01100	Metabolic pathways	DPM1	DPM1	dolichyl-phosphate mannosyltransferase polypeptide 1, catalytic subunit	7.79856e-14	1.0996e-11	1.2669
PATH:01100	Metabolic pathways	UAP1L1	UAP1L1	UDP-N-acetylglucosamine pyrophosphorylase 1 like 1	7.79856e-14	1.0996e-11	1.2669
PATH:01100	Metabolic pathways	SQLE	SQLE	squalene epoxidase	7.79856e-14	1.0996e-11	1.2669
PATH:01100	Metabolic pathways	GANAB	GANAB	glucosidase, alpha; neutral AB	7.79856e-14	1.0996e-11	1.2669
PATH:01100	Metabolic pathways	TSTA3	TSTA3	tissue specific transplantation antigen P35B	7.79856e-14	1.0996e-11	1.2669
PATH:01100	Metabolic pathways	ADH6	ADH6	alcohol dehydrogenase 6 (class V)	7.79856e-14	1.0996e-11	1.2669
PATH:01100	Metabolic pathways	ALG14	ALG14	ALG14, UDP-N-acetylglucosaminyltransferase subunit	7.79856e-14	1.0996e-11	1.2669
PATH:01100	Metabolic pathways	COX5B	COX5B	cytochrome c oxidase subunit Vb	7.79856e-14	1.0996e-11	1.2669
PATH:01100	Metabolic pathways	NDUFS5	NDUFS5	NADH dehydrogenase (ubiquinone) Fe-S protein 5, 15kDa (NADH-coenzyme Q reductase)	7.79856e-14	1.0996e-11	1.2669
PATH:01100	Metabolic pathways	NT5C2	NT5C2	5'-nucleotidase, cytosolic II	7.79856e-14	1.0996e-11	1.2669
PATH:01100	Metabolic pathways	PRDX6	PRDX6	peroxiredoxin 6	7.79856e-14	1.0996e-11	1.2669
PATH:01100	Metabolic pathways	HADHB	HADHB	hydroxyacyl-CoA dehydrogenase/3-ketoacyl-CoA thiolase/enoyl-CoA hydratase (trifunctional protein), beta subunit	7.79856e-14	1.0996e-11	1.2669
PATH:01100	Metabolic pathways	MVD	MVD	mevalonate (diphospho) decarboxylase	7.79856e-14	1.0996e-11	1.2669
PATH:01100	Metabolic pathways	ALAD	ALAD	aminolevulinate dehydratase	7.79856e-14	1.0996e-11	1.2669
PATH:01100	Metabolic pathways	CTPS1	CTPS1	CTP synthase 1	7.79856e-14	1.0996e-11	1.2669
PATH:01100	Metabolic pathways	PAPSS2	PAPSS2	3'-phosphoadenosine 5'-phosphosulfate synthase 2	7.79856e-14	1.0996e-11	1.2669
PATH:01100	Metabolic pathways	ALDH9A1	ALDH9A1	aldehyde dehydrogenase 9 family, member A1	7.79856e-14	1.0996e-11	1.2669
PATH:01100	Metabolic pathways	PIK3C3	PIK3C3	phosphatidylinositol 3-kinase, catalytic subunit type 3	7.79856e-14	1.0996e-11	1.2669
PATH:01100	Metabolic pathways	P4HA1	P4HA1	prolyl 4-hydroxylase, alpha polypeptide I	7.79856e-14	1.0996e-11	1.2669
PATH:01100	Metabolic pathways	UGCG	UGCG	UDP-glucose ceramide glucosyltransferase	7.79856e-14	1.0996e-11	1.2669
PATH:01100	Metabolic pathways	SORD	SORD	sorbitol dehydrogenase	7.79856e-14	1.0996e-11	1.2669
PATH:01100	Metabolic pathways	PYCR2	PYCR2	pyrroline-5-carboxylate reductase family, member 2	7.79856e-14	1.0996e-11	1.2669
PATH:01100	Metabolic pathways	HIBADH	HIBADH	3-hydroxyisobutyrate dehydrogenase	7.79856e-14	1.0996e-11	1.2669
PATH:01100	Metabolic pathways	MGAT2	MGAT2	mannosyl (alpha-1,6-)-glycoprotein beta-1,2-N-acetylglucosaminyltransferase	7.79856e-14	1.0996e-11	1.2669
PATH:01100	Metabolic pathways	ALDH5A1	ALDH5A1	aldehyde dehydrogenase 5 family, member A1	7.79856e-14	1.0996e-11	1.2669
PATH:01100	Metabolic pathways	PDHX	PDHX	pyruvate dehydrogenase complex, component X	7.79856e-14	1.0996e-11	1.2669
PATH:01100	Metabolic pathways	ACSL1	ACSL1	acyl-CoA synthetase long-chain family member 1	7.79856e-14	1.0996e-11	1.2669
PATH:01100	Metabolic pathways	GALNT3	GALNT3	polypeptide N-acetylgalactosaminyltransferase 3	7.79856e-14	1.0996e-11	1.2669
PATH:01100	Metabolic pathways	NDUFS7	NDUFS7	NADH dehydrogenase (ubiquinone) Fe-S protein 7, 20kDa (NADH-coenzyme Q reductase)	7.79856e-14	1.0996e-11	1.2669
PATH:01100	Metabolic pathways	BCAT1	BCAT1	branched chain amino-acid transaminase 1, cytosolic	7.79856e-14	1.0996e-11	1.2669
PATH:01100	Metabolic pathways	AKR1D1	AKR1D1	aldo-keto reductase family 1, member D1	7.79856e-14	1.0996e-11	1.2669
PATH:01100	Metabolic pathways	CDS2	CDS2	CDP-diacylglycerol synthase (phosphatidate cytidylyltransferase) 2	7.79856e-14	1.0996e-11	1.2669
PATH:01100	Metabolic pathways	ACLY	ACLY	ATP citrate lyase	7.79856e-14	1.0996e-11	1.2669
PATH:01100	Metabolic pathways	PTGES2	PTGES2	prostaglandin E synthase 2	7.79856e-14	1.0996e-11	1.2669
PATH:01100	Metabolic pathways	NANP	NANP	N-acetylneuraminic acid phosphatase	7.79856e-14	1.0996e-11	1.2669
PATH:01100	Metabolic pathways	LSS	LSS	lanosterol synthase (2,3-oxidosqualene-lanosterol cyclase)	7.79856e-14	1.0996e-11	1.2669
PATH:01100	Metabolic pathways	MSMO1	MSMO1	methylsterol monooxygenase 1	7.79856e-14	1.0996e-11	1.2669
PATH:01100	Metabolic pathways	DGKQ	DGKQ	diacylglycerol kinase, theta 110kDa	7.79856e-14	1.0996e-11	1.2669
PATH:01100	Metabolic pathways	CSGALNACT1	CSGALNACT1	chondroitin sulfate N-acetylgalactosaminyltransferase 1	7.79856e-14	1.0996e-11	1.2669
PATH:01100	Metabolic pathways	BDH2	BDH2	3-hydroxybutyrate dehydrogenase, type 2	7.79856e-14	1.0996e-11	1.2669
PATH:01100	Metabolic pathways	NME3	NME3	NME/NM23 nucleoside diphosphate kinase 3	7.79856e-14	1.0996e-11	1.2669
PATH:01100	Metabolic pathways	FUT4	FUT4	fucosyltransferase 4 (alpha (1,3) fucosyltransferase, myeloid-specific)	7.79856e-14	1.0996e-11	1.2669
PATH:01100	Metabolic pathways	LDHA	LDHA	lactate dehydrogenase A	7.79856e-14	1.0996e-11	1.2669
PATH:01100	Metabolic pathways	ADSSL1	ADSSL1	adenylosuccinate synthase like 1	7.79856e-14	1.0996e-11	1.2669
PATH:01100	Metabolic pathways	POLE4	POLE4	polymerase (DNA-directed), epsilon 4, accessory subunit	7.79856e-14	1.0996e-11	1.2669
PATH:01100	Metabolic pathways	GMPPB	GMPPB	GDP-mannose pyrophosphorylase B	7.79856e-14	1.0996e-11	1.2669
PATH:01100	Metabolic pathways	ST3GAL5	ST3GAL5	ST3 beta-galactoside alpha-2,3-sialyltransferase 5	7.79856e-14	1.0996e-11	1.2669
PATH:01100	Metabolic pathways	DAO	DAO	D-amino-acid oxidase	7.79856e-14	1.0996e-11	1.2669
PATH:01100	Metabolic pathways	AGMAT	AGMAT	agmatine ureohydrolase (agmatinase)	7.79856e-14	1.0996e-11	1.2669
PATH:01100	Metabolic pathways	GALNT16	GALNT16	polypeptide N-acetylgalactosaminyltransferase 16	7.79856e-14	1.0996e-11	1.2669
PATH:01100	Metabolic pathways	MCCC2	MCCC2	methylcrotonoyl-CoA carboxylase 2 (beta)	7.79856e-14	1.0996e-11	1.2669
PATH:01100	Metabolic pathways	PAICS	PAICS	phosphoribosylaminoimidazole carboxylase, phosphoribosylaminoimidazole succinocarboxamide synthetase	7.79856e-14	1.0996e-11	1.2669
PATH:01100	Metabolic pathways	POLR3K	POLR3K	polymerase (RNA) III (DNA directed) polypeptide K, 12.3 kDa	7.79856e-14	1.0996e-11	1.2669
PATH:01100	Metabolic pathways	SPR	SPR	sepiapterin reductase (7,8-dihydrobiopterin:NADP+ oxidoreductase)	7.79856e-14	1.0996e-11	1.2669
PATH:01100	Metabolic pathways	DEGS1	DEGS1	delta(4)-desaturase, sphingolipid 1	7.79856e-14	1.0996e-11	1.2669
PATH:01100	Metabolic pathways	PLD1	PLD1	phospholipase D1, phosphatidylcholine-specific	7.79856e-14	1.0996e-11	1.2669
PATH:01100	Metabolic pathways	DPM2	DPM2	dolichyl-phosphate mannosyltransferase polypeptide 2, regulatory subunit	7.79856e-14	1.0996e-11	1.2669
PATH:01100	Metabolic pathways	UCK2	UCK2	uridine-cytidine kinase 2	7.79856e-14	1.0996e-11	1.2669
PATH:01100	Metabolic pathways	PANK3	PANK3	pantothenate kinase 3	7.79856e-14	1.0996e-11	1.2669
PATH:01100	Metabolic pathways	ALG10B	ALG10B	ALG10B, alpha-1,2-glucosyltransferase	7.79856e-14	1.0996e-11	1.2669
PATH:01100	Metabolic pathways	CDO1	CDO1	cysteine dioxygenase type 1	7.79856e-14	1.0996e-11	1.2669
PATH:01100	Metabolic pathways	IDH2	IDH2	isocitrate dehydrogenase 2 (NADP+), mitochondrial	7.79856e-14	1.0996e-11	1.2669
PATH:01100	Metabolic pathways	ACACA	ACACA	acetyl-CoA carboxylase alpha	7.79856e-14	1.0996e-11	1.2669
PATH:01100	Metabolic pathways	DHFR	DHFR	dihydrofolate reductase	7.79856e-14	1.0996e-11	1.2669
PATH:01100	Metabolic pathways	PPAT	PPAT	phosphoribosyl pyrophosphate amidotransferase	7.79856e-14	1.0996e-11	1.2669
PATH:01100	Metabolic pathways	COQ3	COQ3	coenzyme Q3 methyltransferase	7.79856e-14	1.0996e-11	1.2669
PATH:01100	Metabolic pathways	RFK	RFK	riboflavin kinase	7.79856e-14	1.0996e-11	1.2669
PATH:01100	Metabolic pathways	SUCLG1	SUCLG1	succinate-CoA ligase, alpha subunit	7.79856e-14	1.0996e-11	1.2669
PATH:01100	Metabolic pathways	B3GALT1	B3GALT1	UDP-Gal:betaGlcNAc beta 1,3-galactosyltransferase, polypeptide 1	7.79856e-14	1.0996e-11	1.2669
PATH:01100	Metabolic pathways	CAD	CAD	carbamoyl-phosphate synthetase 2, aspartate transcarbamylase, and dihydroorotase	7.79856e-14	1.0996e-11	1.2669
PATH:01100	Metabolic pathways	MTHFD1	MTHFD1	methylenetetrahydrofolate dehydrogenase (NADP+ dependent) 1, methenyltetrahydrofolate cyclohydrolase, formyltetrahydrofolate synthetase	7.79856e-14	1.0996e-11	1.2669
PATH:01100	Metabolic pathways	ALG2	ALG2	ALG2, alpha-1,3/1,6-mannosyltransferase	7.79856e-14	1.0996e-11	1.2669
PATH:01100	Metabolic pathways	GCLC	GCLC	glutamate-cysteine ligase, catalytic subunit	7.79856e-14	1.0996e-11	1.2669
PATH:01100	Metabolic pathways	IDI1	IDI1	isopentenyl-diphosphate delta isomerase 1	7.79856e-14	1.0996e-11	1.2669
PATH:01100	Metabolic pathways	GALNS	GALNS	galactosamine (N-acetyl)-6-sulfatase	7.79856e-14	1.0996e-11	1.2669
PATH:01100	Metabolic pathways	CERS4	CERS4	ceramide synthase 4	7.79856e-14	1.0996e-11	1.2669
PATH:01100	Metabolic pathways	FPGT	FPGT	fucose-1-phosphate guanylyltransferase	7.79856e-14	1.0996e-11	1.2669
PATH:01100	Metabolic pathways	POLR3A	POLR3A	polymerase (RNA) III (DNA directed) polypeptide A, 155kDa	7.79856e-14	1.0996e-11	1.2669
PATH:01100	Metabolic pathways	HSD11B2	HSD11B2	hydroxysteroid (11-beta) dehydrogenase 2	7.79856e-14	1.0996e-11	1.2669
PATH:01100	Metabolic pathways	ACAA2	ACAA2	acetyl-CoA acyltransferase 2	7.79856e-14	1.0996e-11	1.2669
PATH:01100	Metabolic pathways	MAN2A1	MAN2A1	mannosidase, alpha, class 2A, member 1	7.79856e-14	1.0996e-11	1.2669
PATH:01100	Metabolic pathways	PRPS1	PRPS1	phosphoribosyl pyrophosphate synthetase 1	7.79856e-14	1.0996e-11	1.2669
PATH:01100	Metabolic pathways	ATP6V0A1	ATP6V0A1	ATPase, H+ transporting, lysosomal V0 subunit a1	7.79856e-14	1.0996e-11	1.2669
PATH:01100	Metabolic pathways	COASY	COASY	CoA synthase	7.79856e-14	1.0996e-11	1.2669
PATH:01100	Metabolic pathways	LIPG	LIPG	lipase, endothelial	7.79856e-14	1.0996e-11	1.2669
PATH:01100	Metabolic pathways	POLD2	POLD2	polymerase (DNA directed), delta 2, accessory subunit	7.79856e-14	1.0996e-11	1.2669
PATH:01100	Metabolic pathways	HMGCL	HMGCL	3-hydroxymethyl-3-methylglutaryl-CoA lyase	7.79856e-14	1.0996e-11	1.2669
PATH:01100	Metabolic pathways	GCLM	GCLM	glutamate-cysteine ligase, modifier subunit	7.79856e-14	1.0996e-11	1.2669
PATH:01100	Metabolic pathways	OAT	OAT	ornithine aminotransferase	7.79856e-14	1.0996e-11	1.2669
PATH:01100	Metabolic pathways	UQCRC1	UQCRC1	ubiquinol-cytochrome c reductase core protein I	7.79856e-14	1.0996e-11	1.2669
PATH:01100	Metabolic pathways	INPP5E	INPP5E	inositol polyphosphate-5-phosphatase, 72 kDa	7.79856e-14	1.0996e-11	1.2669
PATH:01100	Metabolic pathways	HKDC1	HKDC1	hexokinase domain containing 1	7.79856e-14	1.0996e-11	1.2669
PATH:01100	Metabolic pathways	PGAM1	PGAM1	phosphoglycerate mutase 1 (brain)	7.79856e-14	1.0996e-11	1.2669
PATH:01100	Metabolic pathways	PLCG1	PLCG1	phospholipase C, gamma 1	7.79856e-14	1.0996e-11	1.2669
PATH:01100	Metabolic pathways	PHGDH	PHGDH	phosphoglycerate dehydrogenase	7.79856e-14	1.0996e-11	1.2669
PATH:01100	Metabolic pathways	HSD17B2	HSD17B2	hydroxysteroid (17-beta) dehydrogenase 2	7.79856e-14	1.0996e-11	1.2669
PATH:01100	Metabolic pathways	AKR1B10	AKR1B10	aldo-keto reductase family 1, member B10 (aldose reductase)	7.79856e-14	1.0996e-11	1.2669
PATH:01100	Metabolic pathways	GFPT1	GFPT1	glutamine--fructose-6-phosphate transaminase 1	7.79856e-14	1.0996e-11	1.2669
PATH:01100	Metabolic pathways	PSAT1	PSAT1	phosphoserine aminotransferase 1	7.79856e-14	1.0996e-11	1.2669
PATH:01100	Metabolic pathways	EBP	EBP	emopamil binding protein (sterol isomerase)	7.79856e-14	1.0996e-11	1.2669
PATH:01100	Metabolic pathways	UGT2B4	UGT2B4	UDP glucuronosyltransferase 2 family, polypeptide B4	7.79856e-14	1.0996e-11	1.2669
PATH:01100	Metabolic pathways	NDUFV1	NDUFV1	NADH dehydrogenase (ubiquinone) flavoprotein 1, 51kDa	7.79856e-14	1.0996e-11	1.2669
PATH:01100	Metabolic pathways	B3GNT2	B3GNT2	UDP-GlcNAc:betaGal beta-1,3-N-acetylglucosaminyltransferase 2	7.79856e-14	1.0996e-11	1.2669
PATH:01100	Metabolic pathways	MT-ND1	ND1	NADH dehydrogenase, subunit 1 (complex I)	7.79856e-14	1.0996e-11	1.2669
PATH:01100	Metabolic pathways	ASS1	ASS1	argininosuccinate synthase 1	7.79856e-14	1.0996e-11	1.2669
PATH:01100	Metabolic pathways	TRAK2	TRAK2	trafficking protein, kinesin binding 2	7.79856e-14	1.0996e-11	1.2669
PATH:01100	Metabolic pathways	GALNT12	GALNT12	polypeptide N-acetylgalactosaminyltransferase 12	7.79856e-14	1.0996e-11	1.2669
PATH:01100	Metabolic pathways	COX5A	COX5A	cytochrome c oxidase subunit Va	7.79856e-14	1.0996e-11	1.2669
PATH:01100	Metabolic pathways	AOX1	AOX1	aldehyde oxidase 1	7.79856e-14	1.0996e-11	1.2669
PATH:01100	Metabolic pathways	MT-CO3	COX3	cytochrome c oxidase III	7.79856e-14	1.0996e-11	1.2669
PATH:01100	Metabolic pathways	MT-ND4	ND4	NADH dehydrogenase, subunit 4 (complex I)	7.79856e-14	1.0996e-11	1.2669
PATH:01100	Metabolic pathways	CYP2J2	CYP2J2	cytochrome P450, family 2, subfamily J, polypeptide 2	7.79856e-14	1.0996e-11	1.2669
PATH:01100	Metabolic pathways	CMAS	CMAS	cytidine monophosphate N-acetylneuraminic acid synthetase	7.79856e-14	1.0996e-11	1.2669
PATH:01100	Metabolic pathways	PRODH2	PRODH2	proline dehydrogenase (oxidase) 2	7.79856e-14	1.0996e-11	1.2669
PATH:01100	Metabolic pathways	MGAT4A	MGAT4A	mannosyl (alpha-1,3-)-glycoprotein beta-1,4-N-acetylglucosaminyltransferase, isozyme A	7.79856e-14	1.0996e-11	1.2669
PATH:01100	Metabolic pathways	MTR	MTR	5-methyltetrahydrofolate-homocysteine methyltransferase	7.79856e-14	1.0996e-11	1.2669
PATH:01100	Metabolic pathways	NDUFS2	NDUFS2	NADH dehydrogenase (ubiquinone) Fe-S protein 2, 49kDa (NADH-coenzyme Q reductase)	7.79856e-14	1.0996e-11	1.2669
PATH:01100	Metabolic pathways	NDUFAB1	NDUFAB1	NADH dehydrogenase (ubiquinone) 1, alpha/beta subcomplex, 1, 8kDa	7.79856e-14	1.0996e-11	1.2669
PATH:01100	Metabolic pathways	SGSH	SGSH	N-sulfoglucosamine sulfohydrolase	7.79856e-14	1.0996e-11	1.2669
PATH:01100	Metabolic pathways	GOT2	GOT2	glutamic-oxaloacetic transaminase 2, mitochondrial	7.79856e-14	1.0996e-11	1.2669
PATH:01100	Metabolic pathways	HAL	HAL	histidine ammonia-lyase	7.79856e-14	1.0996e-11	1.2669
PATH:01100	Metabolic pathways	SC5D	SC5D	sterol-C5-desaturase	7.79856e-14	1.0996e-11	1.2669
PATH:01100	Metabolic pathways	ITPA	ITPA	inosine triphosphatase (nucleoside triphosphate pyrophosphatase)	7.79856e-14	1.0996e-11	1.2669
PATH:01100	Metabolic pathways	NDUFB3	NDUFB3	NADH dehydrogenase (ubiquinone) 1 beta subcomplex, 3, 12kDa	7.79856e-14	1.0996e-11	1.2669
PATH:01100	Metabolic pathways	DLAT	DLAT	dihydrolipoamide S-acetyltransferase	7.79856e-14	1.0996e-11	1.2669
PATH:01100	Metabolic pathways	PCYT1B	PCYT1B	phosphate cytidylyltransferase 1, choline, beta	7.79856e-14	1.0996e-11	1.2669
PATH:01100	Metabolic pathways	SPHK1	SPHK1	sphingosine kinase 1	7.79856e-14	1.0996e-11	1.2669
PATH:01100	Metabolic pathways	GGT7	GGT7	gamma-glutamyltransferase 7	7.79856e-14	1.0996e-11	1.2669
PATH:01100	Metabolic pathways	GLUD2	GLUD2	glutamate dehydrogenase 2	7.79856e-14	1.0996e-11	1.2669
PATH:01100	Metabolic pathways	PIGC	PIGC	phosphatidylinositol glycan anchor biosynthesis, class C	7.79856e-14	1.0996e-11	1.2669
PATH:01100	Metabolic pathways	NNT	NNT	nicotinamide nucleotide transhydrogenase	7.79856e-14	1.0996e-11	1.2669
PATH:01100	Metabolic pathways	PAFAH1B1	PAFAH1B1	platelet-activating factor acetylhydrolase 1b, regulatory subunit 1 (45kDa)	7.79856e-14	1.0996e-11	1.2669
PATH:01100	Metabolic pathways	QPRT	QPRT	quinolinate phosphoribosyltransferase	7.79856e-14	1.0996e-11	1.2669
PATH:01100	Metabolic pathways	OTC	OTC	ornithine carbamoyltransferase	7.79856e-14	1.0996e-11	1.2669
PATH:01100	Metabolic pathways	GALC	GALC	galactosylceramidase	7.79856e-14	1.0996e-11	1.2669
PATH:01100	Metabolic pathways	UQCRFS1	UQCRFS1	ubiquinol-cytochrome c reductase, Rieske iron-sulfur polypeptide 1	7.79856e-14	1.0996e-11	1.2669
PATH:01100	Metabolic pathways	SDHB	SDHB	succinate dehydrogenase complex, subunit B, iron sulfur (Ip)	7.79856e-14	1.0996e-11	1.2669
PATH:01100	Metabolic pathways	HSD17B10	HSD17B10	hydroxysteroid (17-beta) dehydrogenase 10	7.79856e-14	1.0996e-11	1.2669
PATH:01100	Metabolic pathways	IMPA2	IMPA2	inositol(myo)-1(or 4)-monophosphatase 2	7.79856e-14	1.0996e-11	1.2669
PATH:01100	Metabolic pathways	POLR2J	POLR2J	polymerase (RNA) II (DNA directed) polypeptide J, 13.3kDa	7.79856e-14	1.0996e-11	1.2669
PATH:01100	Metabolic pathways	COX6B1	COX6B1	cytochrome c oxidase subunit VIb polypeptide 1 (ubiquitous)	7.79856e-14	1.0996e-11	1.2669
PATH:01100	Metabolic pathways	ACACB	ACACB	acetyl-CoA carboxylase beta	7.79856e-14	1.0996e-11	1.2669
PATH:01100	Metabolic pathways	AHCYL2	AHCYL2	adenosylhomocysteinase-like 2	7.79856e-14	1.0996e-11	1.2669
PATH:01100	Metabolic pathways	POLR3G	POLR3G	polymerase (RNA) III (DNA directed) polypeptide G (32kD)	7.79856e-14	1.0996e-11	1.2669
PATH:01100	Metabolic pathways	PI4KB	PI4KB	phosphatidylinositol 4-kinase, catalytic, beta	7.79856e-14	1.0996e-11	1.2669
PATH:01100	Metabolic pathways	GFPT2	GFPT2	glutamine-fructose-6-phosphate transaminase 2	7.79856e-14	1.0996e-11	1.2669
PATH:01100	Metabolic pathways	PTDSS1	PTDSS1	phosphatidylserine synthase 1	7.79856e-14	1.0996e-11	1.2669
PATH:01100	Metabolic pathways	EXT2	EXT2	exostosin glycosyltransferase 2	7.79856e-14	1.0996e-11	1.2669
PATH:01100	Metabolic pathways	SMS	SMS	spermine synthase	7.79856e-14	1.0996e-11	1.2669
PATH:01100	Metabolic pathways	FUT6	FUT6	fucosyltransferase 6 (alpha (1,3) fucosyltransferase)	7.79856e-14	1.0996e-11	1.2669
PATH:01100	Metabolic pathways	AHCY	AHCY	adenosylhomocysteinase	7.79856e-14	1.0996e-11	1.2669
PATH:01100	Metabolic pathways	ITPKA	ITPKA	inositol-trisphosphate 3-kinase A	7.79856e-14	1.0996e-11	1.2669
PATH:01100	Metabolic pathways	SRM	SRM	spermidine synthase	7.79856e-14	1.0996e-11	1.2669
PATH:01100	Metabolic pathways	HGD	HGD	homogentisate 1,2-dioxygenase	7.79856e-14	1.0996e-11	1.2669
PATH:01100	Metabolic pathways	B4GAT1	B4GAT1	UDP-GlcNAc:betaGal beta-1,3-N-acetylglucosaminyltransferase 1	7.79856e-14	1.0996e-11	1.2669
PATH:01100	Metabolic pathways	ST3GAL2	ST3GAL2	ST3 beta-galactoside alpha-2,3-sialyltransferase 2	7.79856e-14	1.0996e-11	1.2669
PATH:01100	Metabolic pathways	B4GALT2	B4GALT2	UDP-Gal:betaGlcNAc beta 1,4- galactosyltransferase, polypeptide 2	7.79856e-14	1.0996e-11	1.2669
PATH:01100	Metabolic pathways	HK2	HK2	hexokinase 2	7.79856e-14	1.0996e-11	1.2669
PATH:01100	Metabolic pathways	ENPP1	ENPP1	ectonucleotide pyrophosphatase/phosphodiesterase 1	7.79856e-14	1.0996e-11	1.2669
PATH:01100	Metabolic pathways	TPI1	TPI1	triosephosphate isomerase 1	7.79856e-14	1.0996e-11	1.2669
PATH:01100	Metabolic pathways	GAMT	GAMT	guanidinoacetate N-methyltransferase	7.79856e-14	1.0996e-11	1.2669
PATH:01100	Metabolic pathways	MGAT4C	MGAT4C	MGAT4 family, member C	7.79856e-14	1.0996e-11	1.2669
PATH:01100	Metabolic pathways	COX4I1	COX4I1	cytochrome c oxidase subunit IV isoform 1	7.79856e-14	1.0996e-11	1.2669
PATH:01100	Metabolic pathways	DGAT2	DGAT2	diacylglycerol O-acyltransferase 2	7.79856e-14	1.0996e-11	1.2669
PATH:01100	Metabolic pathways	NT5E	NT5E	5'-nucleotidase, ecto (CD73)	7.79856e-14	1.0996e-11	1.2669
PATH:01100	Metabolic pathways	DHCR7	DHCR7	7-dehydrocholesterol reductase	7.79856e-14	1.0996e-11	1.2669
PATH:01100	Metabolic pathways	PNP	PNP	purine nucleoside phosphorylase	7.79856e-14	1.0996e-11	1.2669
PATH:01100	Metabolic pathways	NDUFB2	NDUFB2	NADH dehydrogenase (ubiquinone) 1 beta subcomplex, 2, 8kDa	7.79856e-14	1.0996e-11	1.2669
PATH:01100	Metabolic pathways	GK	GK	glycerol kinase	7.79856e-14	1.0996e-11	1.2669
PATH:01100	Metabolic pathways	CDIPT	CDIPT	CDP-diacylglycerol--inositol 3-phosphatidyltransferase	7.79856e-14	1.0996e-11	1.2669
PATH:01100	Metabolic pathways	IVD	IVD	isovaleryl-CoA dehydrogenase	7.79856e-14	1.0996e-11	1.2669
PATH:01100	Metabolic pathways	NTPCR	NTPCR	nucleoside-triphosphatase, cancer-related	7.79856e-14	1.0996e-11	1.2669
PATH:01100	Metabolic pathways	SCLY	SCLY	selenocysteine lyase	7.79856e-14	1.0996e-11	1.2669
PATH:01100	Metabolic pathways	ST3GAL1	ST3GAL1	ST3 beta-galactoside alpha-2,3-sialyltransferase 1	7.79856e-14	1.0996e-11	1.2669
PATH:01100	Metabolic pathways	UQCRB	UQCRB	ubiquinol-cytochrome c reductase binding protein	7.79856e-14	1.0996e-11	1.2669
PATH:01100	Metabolic pathways	ENO2	ENO2	enolase 2 (gamma, neuronal)	7.79856e-14	1.0996e-11	1.2669
PATH:01100	Metabolic pathways	HADHA	HADHA	hydroxyacyl-CoA dehydrogenase/3-ketoacyl-CoA thiolase/enoyl-CoA hydratase (trifunctional protein), alpha subunit	7.79856e-14	1.0996e-11	1.2669
PATH:01100	Metabolic pathways	P4HA2	P4HA2	prolyl 4-hydroxylase, alpha polypeptide II	7.79856e-14	1.0996e-11	1.2669
PATH:01100	Metabolic pathways	PGK1	PGK1	phosphoglycerate kinase 1	7.79856e-14	1.0996e-11	1.2669
PATH:01100	Metabolic pathways	ALDH1B1	ALDH1B1	aldehyde dehydrogenase 1 family, member B1	7.79856e-14	1.0996e-11	1.2669
PATH:01100	Metabolic pathways	PGM2	PGM2	phosphoglucomutase 2	7.79856e-14	1.0996e-11	1.2669
PATH:01100	Metabolic pathways	PKM	PKM	pyruvate kinase, muscle	7.79856e-14	1.0996e-11	1.2669
PATH:01100	Metabolic pathways	TKT	TKT	transketolase	7.79856e-14	1.0996e-11	1.2669
PATH:01100	Metabolic pathways	DDC	DDC	dopa decarboxylase (aromatic L-amino acid decarboxylase)	7.79856e-14	1.0996e-11	1.2669
PATH:01100	Metabolic pathways	AASS	AASS	aminoadipate-semialdehyde synthase	7.79856e-14	1.0996e-11	1.2669
PATH:01100	Metabolic pathways	MT-ND3	ND3	NADH dehydrogenase, subunit 3 (complex I)	7.79856e-14	1.0996e-11	1.2669
PATH:01100	Metabolic pathways	PYCR1	PYCR1	pyrroline-5-carboxylate reductase 1	7.79856e-14	1.0996e-11	1.2669
PATH:01100	Metabolic pathways	FUT8	FUT8	fucosyltransferase 8 (alpha (1,6) fucosyltransferase)	7.79856e-14	1.0996e-11	1.2669
PATH:01100	Metabolic pathways	PFAS	PFAS	phosphoribosylformylglycinamidine synthase	7.79856e-14	1.0996e-11	1.2669
PATH:01100	Metabolic pathways	MGAT5	MGAT5	mannosyl (alpha-1,6-)-glycoprotein beta-1,6-N-acetyl-glucosaminyltransferase	7.79856e-14	1.0996e-11	1.2669
PATH:01100	Metabolic pathways	ACAT1	ACAT1	acetyl-CoA acetyltransferase 1	7.79856e-14	1.0996e-11	1.2669
PATH:01100	Metabolic pathways	FTCD	FTCD	formimidoyltransferase cyclodeaminase	7.79856e-14	1.0996e-11	1.2669
PATH:01100	Metabolic pathways	GALNT6	GALNT6	polypeptide N-acetylgalactosaminyltransferase 6	7.79856e-14	1.0996e-11	1.2669
PATH:01100	Metabolic pathways	GAA	GAA	glucosidase, alpha; acid	7.79856e-14	1.0996e-11	1.2669
PATH:01100	Metabolic pathways	UGT2B17	UGT2B17	UDP glucuronosyltransferase 2 family, polypeptide B17	7.79856e-14	1.0996e-11	1.2669
PATH:01100	Metabolic pathways	IMPDH1	IMPDH1	IMP (inosine 5'-monophosphate) dehydrogenase 1	7.79856e-14	1.0996e-11	1.2669
PATH:01100	Metabolic pathways	CYP19A1	CYP19A1	cytochrome P450, family 19, subfamily A, polypeptide 1	7.79856e-14	1.0996e-11	1.2669
PATH:01100	Metabolic pathways	UMPS	UMPS	uridine monophosphate synthetase	7.79856e-14	1.0996e-11	1.2669
PATH:01100	Metabolic pathways	ASNS	ASNS	asparagine synthetase (glutamine-hydrolyzing)	7.79856e-14	1.0996e-11	1.2669
PATH:01100	Metabolic pathways	UGDH	UGDH	UDP-glucose 6-dehydrogenase	7.79856e-14	1.0996e-11	1.2669
PATH:01100	Metabolic pathways	CHKA	CHKA	choline kinase alpha	7.79856e-14	1.0996e-11	1.2669
PATH:01100	Metabolic pathways	DPYD	DPYD	dihydropyrimidine dehydrogenase	7.79856e-14	1.0996e-11	1.2669
PATH:01100	Metabolic pathways	LDHB	LDHB	lactate dehydrogenase B	7.79856e-14	1.0996e-11	1.2669
PATH:01100	Metabolic pathways	MAN1A2	MAN1A2	mannosidase, alpha, class 1A, member 2	7.79856e-14	1.0996e-11	1.2669
PATH:01100	Metabolic pathways	LPCAT1	LPCAT1	lysophosphatidylcholine acyltransferase 1	7.79856e-14	1.0996e-11	1.2669
PATH:01100	Metabolic pathways	HSD17B12	HSD17B12	hydroxysteroid (17-beta) dehydrogenase 12	7.79856e-14	1.0996e-11	1.2669
PATH:01100	Metabolic pathways	CERS5	CERS5	ceramide synthase 5	7.79856e-14	1.0996e-11	1.2669
PATH:01100	Metabolic pathways	MT-CO1	COX1	cytochrome c oxidase subunit I	7.79856e-14	1.0996e-11	1.2669
PATH:01100	Metabolic pathways	NDUFA5	NDUFA5	NADH dehydrogenase (ubiquinone) 1 alpha subcomplex, 5	7.79856e-14	1.0996e-11	1.2669
PATH:01100	Metabolic pathways	GPAM	GPAM	glycerol-3-phosphate acyltransferase, mitochondrial	7.79856e-14	1.0996e-11	1.2669
PATH:01100	Metabolic pathways	APRT	APRT	adenine phosphoribosyltransferase	7.79856e-14	1.0996e-11	1.2669
PATH:01100	Metabolic pathways	TWISTNB	TWISTNB	TWIST neighbor	7.79856e-14	1.0996e-11	1.2669
PATH:01100	Metabolic pathways	RDH10	RDH10	retinol dehydrogenase 10 (all-trans)	7.79856e-14	1.0996e-11	1.2669
PATH:01100	Metabolic pathways	KL	KL	klotho	7.79856e-14	1.0996e-11	1.2669
PATH:01100	Metabolic pathways	POLR1A	POLR1A	polymerase (RNA) I polypeptide A, 194kDa	7.79856e-14	1.0996e-11	1.2669
PATH:01100	Metabolic pathways	TM7SF2	TM7SF2	transmembrane 7 superfamily member 2	7.79856e-14	1.0996e-11	1.2669
PATH:01100	Metabolic pathways	GCH1	GCH1	GTP cyclohydrolase 1	7.79856e-14	1.0996e-11	1.2669
PATH:01100	Metabolic pathways	AGPAT2	AGPAT2	1-acylglycerol-3-phosphate O-acyltransferase 2	7.79856e-14	1.0996e-11	1.2669
PATH:01100	Metabolic pathways	PI4K2B	PI4K2B	phosphatidylinositol 4-kinase type 2 beta	7.79856e-14	1.0996e-11	1.2669
PATH:01100	Metabolic pathways	GLUL	GLUL	glutamate-ammonia ligase	7.79856e-14	1.0996e-11	1.2669
PATH:01100	Metabolic pathways	UGT2B11	UGT2B11	UDP glucuronosyltransferase 2 family, polypeptide B11	7.79856e-14	1.0996e-11	1.2669
PATH:01100	Metabolic pathways	G6PD	G6PD	glucose-6-phosphate dehydrogenase	7.79856e-14	1.0996e-11	1.2669
PATH:01100	Metabolic pathways	PIP5K1C	PIP5K1C	phosphatidylinositol-4-phosphate 5-kinase, type I, gamma	7.79856e-14	1.0996e-11	1.2669
PATH:01100	Metabolic pathways	CYC1	CYC1	cytochrome c-1	7.79856e-14	1.0996e-11	1.2669
PATH:01100	Metabolic pathways	PGAP1	PGAP1	post-GPI attachment to proteins 1	7.79856e-14	1.0996e-11	1.2669
PATH:01100	Metabolic pathways	CRLS1	CRLS1	cardiolipin synthase 1	7.79856e-14	1.0996e-11	1.2669
PATH:01100	Metabolic pathways	LIPC	LIPC	lipase, hepatic	7.79856e-14	1.0996e-11	1.2669
PATH:01100	Metabolic pathways	PIPOX	PIPOX	pipecolic acid oxidase	7.79856e-14	1.0996e-11	1.2669
PATH:01100	Metabolic pathways	NANS	NANS	N-acetylneuraminic acid synthase	7.79856e-14	1.0996e-11	1.2669
PATH:01100	Metabolic pathways	PON1	PON1	paraoxonase 1	7.79856e-14	1.0996e-11	1.2669
PATH:01100	Metabolic pathways	TAT	TAT	tyrosine aminotransferase	7.79856e-14	1.0996e-11	1.2669
PATH:01100	Metabolic pathways	RRM2	RRM2	ribonucleotide reductase M2	7.79856e-14	1.0996e-11	1.2669
PATH:01100	Metabolic pathways	IDH3B	IDH3B	isocitrate dehydrogenase 3 (NAD+) beta	7.79856e-14	1.0996e-11	1.2669
PATH:01100	Metabolic pathways	GMPPA	GMPPA	GDP-mannose pyrophosphorylase A	7.79856e-14	1.0996e-11	1.2669
PATH:01100	Metabolic pathways	AMT	AMT	aminomethyltransferase	7.79856e-14	1.0996e-11	1.2669
PATH:01100	Metabolic pathways	DCXR	DCXR	dicarbonyl/L-xylulose reductase	7.79856e-14	1.0996e-11	1.2669
PATH:01100	Metabolic pathways	POLR2L	POLR2L	polymerase (RNA) II (DNA directed) polypeptide L, 7.6kDa	7.79856e-14	1.0996e-11	1.2669
PATH:01100	Metabolic pathways	SCP2	SCP2	sterol carrier protein 2	7.79856e-14	1.0996e-11	1.2669
PATH:01100	Metabolic pathways	GCNT4	GCNT4	glucosaminyl (N-acetyl) transferase 4, core 2	7.79856e-14	1.0996e-11	1.2669
PATH:01100	Metabolic pathways	ATIC	ATIC	5-aminoimidazole-4-carboxamide ribonucleotide formyltransferase/IMP cyclohydrolase	7.79856e-14	1.0996e-11	1.2669
PATH:01100	Metabolic pathways	FUT3	FUT3	fucosyltransferase 3 (galactoside 3(4)-L-fucosyltransferase, Lewis blood group)	7.79856e-14	1.0996e-11	1.2669
PATH:01100	Metabolic pathways	PIP5K1A	PIP5K1A	phosphatidylinositol-4-phosphate 5-kinase, type I, alpha	7.79856e-14	1.0996e-11	1.2669
PATH:01100	Metabolic pathways	UQCRHL	UQCRHL	ubiquinol-cytochrome c reductase hinge protein-like	7.79856e-14	1.0996e-11	1.2669
PATH:01100	Metabolic pathways	ALDH3B1	ALDH3B1	aldehyde dehydrogenase 3 family, member B1	7.79856e-14	1.0996e-11	1.2669
PATH:01100	Metabolic pathways	PEMT	PEMT	phosphatidylethanolamine N-methyltransferase	7.79856e-14	1.0996e-11	1.2669
PATH:01100	Metabolic pathways	MAN2A2	MAN2A2	mannosidase, alpha, class 2A, member 2	7.79856e-14	1.0996e-11	1.2669
PATH:01100	Metabolic pathways	PIGT	PIGT	phosphatidylinositol glycan anchor biosynthesis, class T	7.79856e-14	1.0996e-11	1.2669
PATH:01100	Metabolic pathways	HMGCS1	HMGCS1	3-hydroxy-3-methylglutaryl-CoA synthase 1 (soluble)	7.79856e-14	1.0996e-11	1.2669
PATH:01100	Metabolic pathways	CAT	CAT	catalase	7.79856e-14	1.0996e-11	1.2669
PATH:01100	Metabolic pathways	HPSE	HPSE	heparanase	7.79856e-14	1.0996e-11	1.2669
PATH:01100	Metabolic pathways	ALDH3A2	ALDH3A2	aldehyde dehydrogenase 3 family, member A2	7.79856e-14	1.0996e-11	1.2669
PATH:01100	Metabolic pathways	DBH	DBH	dopamine beta-hydroxylase (dopamine beta-monooxygenase)	7.79856e-14	1.0996e-11	1.2669
PATH:01100	Metabolic pathways	IDS	IDS	iduronate 2-sulfatase	7.79856e-14	1.0996e-11	1.2669
PATH:01100	Metabolic pathways	UGT1A1	UGT1A1	UDP glucuronosyltransferase 1 family, polypeptide A1	7.79856e-14	1.0996e-11	1.2669
PATH:01100	Metabolic pathways	AGXT2	AGXT2	alanine--glyoxylate aminotransferase 2	7.79856e-14	1.0996e-11	1.2669
PATH:01100	Metabolic pathways	AMPD3	AMPD3	adenosine monophosphate deaminase 3	7.79856e-14	1.0996e-11	1.2669
PATH:01100	Metabolic pathways	UPP1	UPP1	uridine phosphorylase 1	7.79856e-14	1.0996e-11	1.2669
PATH:01100	Metabolic pathways	COX10	COX10	cytochrome c oxidase assembly homolog 10 (yeast)	7.79856e-14	1.0996e-11	1.2669
PATH:01100	Metabolic pathways	POLE2	POLE2	polymerase (DNA directed), epsilon 2, accessory subunit	7.79856e-14	1.0996e-11	1.2669
PATH:00310	Lysine degradation	EHMT1	EHMT1	euchromatic histone-lysine N-methyltransferase 1	9.46574e-06	0.00088978	1.83692
PATH:00310	Lysine degradation	ECHS1	ECHS1	enoyl CoA hydratase, short chain, 1, mitochondrial	9.46574e-06	0.00088978	1.83692
PATH:00310	Lysine degradation	HADH	HADH	hydroxyacyl-CoA dehydrogenase	9.46574e-06	0.00088978	1.83692
PATH:00310	Lysine degradation	KMT2A	KMT2A	lysine (K)-specific methyltransferase 2A	9.46574e-06	0.00088978	1.83692
PATH:00310	Lysine degradation	SUV39H1	SUV39H1	suppressor of variegation 3-9 homolog 1 (Drosophila)	9.46574e-06	0.00088978	1.83692
PATH:00310	Lysine degradation	COLGALT2	COLGALT2	collagen beta(1-O)galactosyltransferase 2	9.46574e-06	0.00088978	1.83692
PATH:00310	Lysine degradation	OGDHL	OGDHL	oxoglutarate dehydrogenase-like	9.46574e-06	0.00088978	1.83692
PATH:00310	Lysine degradation	PLOD3	PLOD3	procollagen-lysine, 2-oxoglutarate 5-dioxygenase 3	9.46574e-06	0.00088978	1.83692
PATH:00310	Lysine degradation	KMT5B	SUV420H1	suppressor of variegation 4-20 homolog 1 (Drosophila)	9.46574e-06	0.00088978	1.83692
PATH:00310	Lysine degradation	PLOD2	PLOD2	procollagen-lysine, 2-oxoglutarate 5-dioxygenase 2	9.46574e-06	0.00088978	1.83692
PATH:00310	Lysine degradation	SETD1A	SETD1A	SET domain containing 1A	9.46574e-06	0.00088978	1.83692
PATH:00310	Lysine degradation	SETD2	SETD2	SET domain containing 2	9.46574e-06	0.00088978	1.83692
PATH:00310	Lysine degradation	COLGALT1	COLGALT1	collagen beta(1-O)galactosyltransferase 1	9.46574e-06	0.00088978	1.83692
PATH:00310	Lysine degradation	GCDH	GCDH	glutaryl-CoA dehydrogenase	9.46574e-06	0.00088978	1.83692
PATH:00310	Lysine degradation	ACAT2	ACAT2	acetyl-CoA acetyltransferase 2	9.46574e-06	0.00088978	1.83692
PATH:00310	Lysine degradation	DLST	DLST	dihydrolipoamide S-succinyltransferase (E2 component of 2-oxo-glutarate complex)	9.46574e-06	0.00088978	1.83692
PATH:00310	Lysine degradation	EHHADH	EHHADH	enoyl-CoA, hydratase/3-hydroxyacyl CoA dehydrogenase	9.46574e-06	0.00088978	1.83692
PATH:00310	Lysine degradation	SETD1B	SETD1B	SET domain containing 1B	9.46574e-06	0.00088978	1.83692
PATH:00310	Lysine degradation	ALDH9A1	ALDH9A1	aldehyde dehydrogenase 9 family, member A1	9.46574e-06	0.00088978	1.83692
PATH:00310	Lysine degradation	PHYKPL	PHYKPL	5-phosphohydroxy-L-lysine phospho-lyase	9.46574e-06	0.00088978	1.83692
PATH:00310	Lysine degradation	KMT2E	KMT2E	lysine (K)-specific methyltransferase 2E	9.46574e-06	0.00088978	1.83692
PATH:00310	Lysine degradation	NSD3	WHSC1L1	Wolf-Hirschhorn syndrome candidate 1-like 1	9.46574e-06	0.00088978	1.83692
PATH:00310	Lysine degradation	DOT1L	DOT1L	DOT1-like histone H3K79 methyltransferase	9.46574e-06	0.00088978	1.83692
PATH:00310	Lysine degradation	NSD1	NSD1	nuclear receptor binding SET domain protein 1	9.46574e-06	0.00088978	1.83692
PATH:00310	Lysine degradation	HADHA	HADHA	hydroxyacyl-CoA dehydrogenase/3-ketoacyl-CoA thiolase/enoyl-CoA hydratase (trifunctional protein), alpha subunit	9.46574e-06	0.00088978	1.83692
PATH:00310	Lysine degradation	ALDH1B1	ALDH1B1	aldehyde dehydrogenase 1 family, member B1	9.46574e-06	0.00088978	1.83692
PATH:00310	Lysine degradation	KMT2D	KMT2D	lysine (K)-specific methyltransferase 2D	9.46574e-06	0.00088978	1.83692
PATH:00310	Lysine degradation	AASS	AASS	aminoadipate-semialdehyde synthase	9.46574e-06	0.00088978	1.83692
PATH:00310	Lysine degradation	ACAT1	ACAT1	acetyl-CoA acetyltransferase 1	9.46574e-06	0.00088978	1.83692
PATH:00310	Lysine degradation	KMT2C	KMT2C	lysine (K)-specific methyltransferase 2C	9.46574e-06	0.00088978	1.83692
PATH:00310	Lysine degradation	PIPOX	PIPOX	pipecolic acid oxidase	9.46574e-06	0.00088978	1.83692
PATH:00310	Lysine degradation	SETD7	SETD7	SET domain containing (lysine methyltransferase) 7	9.46574e-06	0.00088978	1.83692
PATH:00310	Lysine degradation	ALDH3A2	ALDH3A2	aldehyde dehydrogenase 3 family, member A2	9.46574e-06	0.00088978	1.83692
PATH:00310	Lysine degradation	ASH1L	ASH1L	ash1 (absent, small, or homeotic)-like (Drosophila)	9.46574e-06	0.00088978	1.83692
PATH:01200	Carbon metabolism	GOT1	GOT1	glutamic-oxaloacetic transaminase 1, soluble	1.40627e-05	0.000915479	1.55965
PATH:01200	Carbon metabolism	PC	PC	pyruvate carboxylase	1.40627e-05	0.000915479	1.55965
PATH:01200	Carbon metabolism	ACO1	ACO1	aconitase 1, soluble	1.40627e-05	0.000915479	1.55965
PATH:01200	Carbon metabolism	IDH1	IDH1	isocitrate dehydrogenase 1 (NADP+), soluble	1.40627e-05	0.000915479	1.55965
PATH:01200	Carbon metabolism	SUCLG2	SUCLG2	succinate-CoA ligase, GDP-forming, beta subunit	1.40627e-05	0.000915479	1.55965
PATH:01200	Carbon metabolism	ECHS1	ECHS1	enoyl CoA hydratase, short chain, 1, mitochondrial	1.40627e-05	0.000915479	1.55965
PATH:01200	Carbon metabolism	PCCB	PCCB	propionyl CoA carboxylase, beta polypeptide	1.40627e-05	0.000915479	1.55965
PATH:01200	Carbon metabolism	GPT2	GPT2	glutamic pyruvate transaminase (alanine aminotransferase) 2	1.40627e-05	0.000915479	1.55965
PATH:01200	Carbon metabolism	ENO1	ENO1	enolase 1, (alpha)	1.40627e-05	0.000915479	1.55965
PATH:01200	Carbon metabolism	GPT	GPT	glutamic-pyruvate transaminase (alanine aminotransferase)	1.40627e-05	0.000915479	1.55965
PATH:01200	Carbon metabolism	PGAM2	PGAM2	phosphoglycerate mutase 2 (muscle)	1.40627e-05	0.000915479	1.55965
PATH:01200	Carbon metabolism	PSPH	PSPH	phosphoserine phosphatase	1.40627e-05	0.000915479	1.55965
PATH:01200	Carbon metabolism	HIBCH	HIBCH	3-hydroxyisobutyryl-CoA hydrolase	1.40627e-05	0.000915479	1.55965
PATH:01200	Carbon metabolism	PDHA1	PDHA1	pyruvate dehydrogenase (lipoamide) alpha 1	1.40627e-05	0.000915479	1.55965
PATH:01200	Carbon metabolism	PGD	PGD	phosphogluconate dehydrogenase	1.40627e-05	0.000915479	1.55965
PATH:01200	Carbon metabolism	ADH5	ADH5	alcohol dehydrogenase 5 (class III), chi polypeptide	1.40627e-05	0.000915479	1.55965
PATH:01200	Carbon metabolism	SHMT2	SHMT2	serine hydroxymethyltransferase 2 (mitochondrial)	1.40627e-05	0.000915479	1.55965
PATH:01200	Carbon metabolism	PFKM	PFKM	phosphofructokinase, muscle	1.40627e-05	0.000915479	1.55965
PATH:01200	Carbon metabolism	OGDHL	OGDHL	oxoglutarate dehydrogenase-like	1.40627e-05	0.000915479	1.55965
PATH:01200	Carbon metabolism	AGXT	AGXT	alanine-glyoxylate aminotransferase	1.40627e-05	0.000915479	1.55965
PATH:01200	Carbon metabolism	AC093512.2	ALDOA	aldolase A, fructose-bisphosphate	1.40627e-05	0.000915479	1.55965
PATH:01200	Carbon metabolism	SDHA	SDHA	succinate dehydrogenase complex, subunit A, flavoprotein (Fp)	1.40627e-05	0.000915479	1.55965
PATH:01200	Carbon metabolism	ME3	ME3	malic enzyme 3, NADP(+)-dependent, mitochondrial	1.40627e-05	0.000915479	1.55965
PATH:01200	Carbon metabolism	DLD	DLD	dihydrolipoamide dehydrogenase	1.40627e-05	0.000915479	1.55965
PATH:01200	Carbon metabolism	FH	FH	fumarate hydratase	1.40627e-05	0.000915479	1.55965
PATH:01200	Carbon metabolism	SDHC	SDHC	succinate dehydrogenase complex, subunit C, integral membrane protein, 15kDa	1.40627e-05	0.000915479	1.55965
PATH:01200	Carbon metabolism	GPI	GPI	glucose-6-phosphate isomerase	1.40627e-05	0.000915479	1.55965
PATH:01200	Carbon metabolism	ACAT2	ACAT2	acetyl-CoA acetyltransferase 2	1.40627e-05	0.000915479	1.55965
PATH:01200	Carbon metabolism	DLST	DLST	dihydrolipoamide S-succinyltransferase (E2 component of 2-oxo-glutarate complex)	1.40627e-05	0.000915479	1.55965
PATH:01200	Carbon metabolism	ENO3	ENO3	enolase 3 (beta, muscle)	1.40627e-05	0.000915479	1.55965
PATH:01200	Carbon metabolism	ACSS2	ACSS2	acyl-CoA synthetase short-chain family member 2	1.40627e-05	0.000915479	1.55965
PATH:01200	Carbon metabolism	GLDC	GLDC	glycine dehydrogenase (decarboxylating)	1.40627e-05	0.000915479	1.55965
PATH:01200	Carbon metabolism	ESD	ESD	esterase D	1.40627e-05	0.000915479	1.55965
PATH:01200	Carbon metabolism	MDH2	MDH2	malate dehydrogenase 2, NAD (mitochondrial)	1.40627e-05	0.000915479	1.55965
PATH:01200	Carbon metabolism	GAPDH	GAPDH	glyceraldehyde-3-phosphate dehydrogenase	1.40627e-05	0.000915479	1.55965
PATH:01200	Carbon metabolism	EHHADH	EHHADH	enoyl-CoA, hydratase/3-hydroxyacyl CoA dehydrogenase	1.40627e-05	0.000915479	1.55965
PATH:01200	Carbon metabolism	ACO2	ACO2	aconitase 2, mitochondrial	1.40627e-05	0.000915479	1.55965
PATH:01200	Carbon metabolism	TALDO1	TALDO1	transaldolase 1	1.40627e-05	0.000915479	1.55965
PATH:01200	Carbon metabolism	IDH2	IDH2	isocitrate dehydrogenase 2 (NADP+), mitochondrial	1.40627e-05	0.000915479	1.55965
PATH:01200	Carbon metabolism	SUCLG1	SUCLG1	succinate-CoA ligase, alpha subunit	1.40627e-05	0.000915479	1.55965
PATH:01200	Carbon metabolism	PRPS1	PRPS1	phosphoribosyl pyrophosphate synthetase 1	1.40627e-05	0.000915479	1.55965
PATH:01200	Carbon metabolism	HKDC1	HKDC1	hexokinase domain containing 1	1.40627e-05	0.000915479	1.55965
PATH:01200	Carbon metabolism	PGAM1	PGAM1	phosphoglycerate mutase 1 (brain)	1.40627e-05	0.000915479	1.55965
PATH:01200	Carbon metabolism	PHGDH	PHGDH	phosphoglycerate dehydrogenase	1.40627e-05	0.000915479	1.55965
PATH:01200	Carbon metabolism	PSAT1	PSAT1	phosphoserine aminotransferase 1	1.40627e-05	0.000915479	1.55965
PATH:01200	Carbon metabolism	GOT2	GOT2	glutamic-oxaloacetic transaminase 2, mitochondrial	1.40627e-05	0.000915479	1.55965
PATH:01200	Carbon metabolism	DLAT	DLAT	dihydrolipoamide S-acetyltransferase	1.40627e-05	0.000915479	1.55965
PATH:01200	Carbon metabolism	SDHB	SDHB	succinate dehydrogenase complex, subunit B, iron sulfur (Ip)	1.40627e-05	0.000915479	1.55965
PATH:01200	Carbon metabolism	ME2	ME2	malic enzyme 2, NAD(+)-dependent, mitochondrial	1.40627e-05	0.000915479	1.55965
PATH:01200	Carbon metabolism	HK2	HK2	hexokinase 2	1.40627e-05	0.000915479	1.55965
PATH:01200	Carbon metabolism	TPI1	TPI1	triosephosphate isomerase 1	1.40627e-05	0.000915479	1.55965
PATH:01200	Carbon metabolism	ENO2	ENO2	enolase 2 (gamma, neuronal)	1.40627e-05	0.000915479	1.55965
PATH:01200	Carbon metabolism	HADHA	HADHA	hydroxyacyl-CoA dehydrogenase/3-ketoacyl-CoA thiolase/enoyl-CoA hydratase (trifunctional protein), alpha subunit	1.40627e-05	0.000915479	1.55965
PATH:01200	Carbon metabolism	PGK1	PGK1	phosphoglycerate kinase 1	1.40627e-05	0.000915479	1.55965
PATH:01200	Carbon metabolism	PKM	PKM	pyruvate kinase, muscle	1.40627e-05	0.000915479	1.55965
PATH:01200	Carbon metabolism	TKT	TKT	transketolase	1.40627e-05	0.000915479	1.55965
PATH:01200	Carbon metabolism	ACAT1	ACAT1	acetyl-CoA acetyltransferase 1	1.40627e-05	0.000915479	1.55965
PATH:01200	Carbon metabolism	G6PD	G6PD	glucose-6-phosphate dehydrogenase	1.40627e-05	0.000915479	1.55965
PATH:01200	Carbon metabolism	IDH3B	IDH3B	isocitrate dehydrogenase 3 (NAD+) beta	1.40627e-05	0.000915479	1.55965
PATH:01200	Carbon metabolism	AMT	AMT	aminomethyltransferase	1.40627e-05	0.000915479	1.55965
PATH:03050	Proteasome	PSMD4	PSMD4	proteasome (prosome, macropain) 26S subunit, non-ATPase, 4	1.62319e-05	0.000915479	1.87867
PATH:03050	Proteasome	PSMD3	PSMD3	proteasome (prosome, macropain) 26S subunit, non-ATPase, 3	1.62319e-05	0.000915479	1.87867
PATH:03050	Proteasome	PSMB6	PSMB6	proteasome (prosome, macropain) subunit, beta type, 6	1.62319e-05	0.000915479	1.87867
PATH:03050	Proteasome	PSMA7	PSMA7	proteasome (prosome, macropain) subunit, alpha type, 7	1.62319e-05	0.000915479	1.87867
PATH:03050	Proteasome	PSMA5	PSMA5	proteasome (prosome, macropain) subunit, alpha type, 5	1.62319e-05	0.000915479	1.87867
PATH:03050	Proteasome	PSMC3	PSMC3	proteasome (prosome, macropain) 26S subunit, ATPase, 3	1.62319e-05	0.000915479	1.87867
PATH:03050	Proteasome	PSMD14	PSMD14	proteasome (prosome, macropain) 26S subunit, non-ATPase, 14	1.62319e-05	0.000915479	1.87867
PATH:03050	Proteasome	PSME3	PSME3	proteasome (prosome, macropain) activator subunit 3 (PA28 gamma; Ki)	1.62319e-05	0.000915479	1.87867
PATH:03050	Proteasome	PSMC6	PSMC6	proteasome (prosome, macropain) 26S subunit, ATPase, 6	1.62319e-05	0.000915479	1.87867
PATH:03050	Proteasome	PSMA3	PSMA3	proteasome (prosome, macropain) subunit, alpha type, 3	1.62319e-05	0.000915479	1.87867
PATH:03050	Proteasome	PSMB4	PSMB4	proteasome (prosome, macropain) subunit, beta type, 4	1.62319e-05	0.000915479	1.87867
PATH:03050	Proteasome	PSMD11	PSMD11	proteasome (prosome, macropain) 26S subunit, non-ATPase, 11	1.62319e-05	0.000915479	1.87867
PATH:03050	Proteasome	PSMD8	PSMD8	proteasome (prosome, macropain) 26S subunit, non-ATPase, 8	1.62319e-05	0.000915479	1.87867
PATH:03050	Proteasome	SEM1	SHFM1	split hand/foot malformation (ectrodactyly) type 1	1.62319e-05	0.000915479	1.87867
PATH:03050	Proteasome	POMP	POMP	proteasome maturation protein	1.62319e-05	0.000915479	1.87867
PATH:03050	Proteasome	PSME4	PSME4	proteasome (prosome, macropain) activator subunit 4	1.62319e-05	0.000915479	1.87867
PATH:03050	Proteasome	PSMB7	PSMB7	proteasome (prosome, macropain) subunit, beta type, 7	1.62319e-05	0.000915479	1.87867
PATH:03050	Proteasome	PSMB2	PSMB2	proteasome (prosome, macropain) subunit, beta type, 2	1.62319e-05	0.000915479	1.87867
PATH:03050	Proteasome	PSMB1	PSMB1	proteasome (prosome, macropain) subunit, beta type, 1	1.62319e-05	0.000915479	1.87867
PATH:03050	Proteasome	PSMD2	PSMD2	proteasome (prosome, macropain) 26S subunit, non-ATPase, 2	1.62319e-05	0.000915479	1.87867
PATH:03050	Proteasome	PSMB5	PSMB5	proteasome (prosome, macropain) subunit, beta type, 5	1.62319e-05	0.000915479	1.87867
PATH:03050	Proteasome	PSMC5	PSMC5	proteasome (prosome, macropain) 26S subunit, ATPase, 5	1.62319e-05	0.000915479	1.87867
PATH:03050	Proteasome	PSMD12	PSMD12	proteasome (prosome, macropain) 26S subunit, non-ATPase, 12	1.62319e-05	0.000915479	1.87867
PATH:03050	Proteasome	PSMD7	PSMD7	proteasome (prosome, macropain) 26S subunit, non-ATPase, 7	1.62319e-05	0.000915479	1.87867
PATH:03050	Proteasome	PSMC2	PSMC2	proteasome (prosome, macropain) 26S subunit, ATPase, 2	1.62319e-05	0.000915479	1.87867
PATH:03050	Proteasome	PSMD13	PSMD13	proteasome (prosome, macropain) 26S subunit, non-ATPase, 13	1.62319e-05	0.000915479	1.87867
PATH:03050	Proteasome	PSMA4	PSMA4	proteasome (prosome, macropain) subunit, alpha type, 4	1.62319e-05	0.000915479	1.87867
PATH:03050	Proteasome	PSMD1	PSMD1	proteasome (prosome, macropain) 26S subunit, non-ATPase, 1	1.62319e-05	0.000915479	1.87867
PATH:03050	Proteasome	PSMD6	PSMD6	proteasome (prosome, macropain) 26S subunit, non-ATPase, 6	1.62319e-05	0.000915479	1.87867
PATH:03050	Proteasome	PSMF1	PSMF1	proteasome (prosome, macropain) inhibitor subunit 1 (PI31)	1.62319e-05	0.000915479	1.87867
PATH:03008	Ribosome biogenesis in eukaryotes	NOL6	NOL6	nucleolar protein 6 (RNA-associated)	2.28765e-05	0.0010752	1.65323
PATH:03008	Ribosome biogenesis in eukaryotes	TCOF1	TCOF1	Treacher Collins-Franceschetti syndrome 1	2.28765e-05	0.0010752	1.65323
PATH:03008	Ribosome biogenesis in eukaryotes	GNL2	GNL2	guanine nucleotide binding protein-like 2 (nucleolar)	2.28765e-05	0.0010752	1.65323
PATH:03008	Ribosome biogenesis in eukaryotes	GTPBP4	GTPBP4	GTP binding protein 4	2.28765e-05	0.0010752	1.65323
PATH:03008	Ribosome biogenesis in eukaryotes	GNL3L	GNL3L	guanine nucleotide binding protein-like 3 (nucleolar)-like	2.28765e-05	0.0010752	1.65323
PATH:03008	Ribosome biogenesis in eukaryotes	UTP14A	UTP14A	UTP14, U3 small nucleolar ribonucleoprotein, homolog A (yeast)	2.28765e-05	0.0010752	1.65323
PATH:03008	Ribosome biogenesis in eukaryotes	DROSHA	DROSHA	drosha, ribonuclease type III	2.28765e-05	0.0010752	1.65323
PATH:03008	Ribosome biogenesis in eukaryotes	TBL3	TBL3	transducin (beta)-like 3	2.28765e-05	0.0010752	1.65323
PATH:03008	Ribosome biogenesis in eukaryotes	POP5	POP5	processing of precursor 5, ribonuclease P/MRP subunit (S. cerevisiae)	2.28765e-05	0.0010752	1.65323
PATH:03008	Ribosome biogenesis in eukaryotes	NMD3	NMD3	NMD3 ribosome export adaptor	2.28765e-05	0.0010752	1.65323
PATH:03008	Ribosome biogenesis in eukaryotes	XPO1	XPO1	exportin 1	2.28765e-05	0.0010752	1.65323
PATH:03008	Ribosome biogenesis in eukaryotes	NOP56	NOP56	NOP56 ribonucleoprotein	2.28765e-05	0.0010752	1.65323
PATH:03008	Ribosome biogenesis in eukaryotes	NOP58	NOP58	NOP58 ribonucleoprotein	2.28765e-05	0.0010752	1.65323
PATH:03008	Ribosome biogenesis in eukaryotes	POP1	POP1	processing of precursor 1, ribonuclease P/MRP subunit (S. cerevisiae)	2.28765e-05	0.0010752	1.65323
PATH:03008	Ribosome biogenesis in eukaryotes	POP7	POP7	processing of precursor 7, ribonuclease P/MRP subunit (S. cerevisiae)	2.28765e-05	0.0010752	1.65323
PATH:03008	Ribosome biogenesis in eukaryotes	EMG1	EMG1	EMG1 N1-specific pseudouridine methyltransferase	2.28765e-05	0.0010752	1.65323
PATH:03008	Ribosome biogenesis in eukaryotes	WDR3	WDR3	WD repeat domain 3	2.28765e-05	0.0010752	1.65323
PATH:03008	Ribosome biogenesis in eukaryotes	BMS1	BMS1	BMS1 ribosome biogenesis factor	2.28765e-05	0.0010752	1.65323
PATH:03008	Ribosome biogenesis in eukaryotes	UTP18	UTP18	UTP18 small subunit (SSU) processome component homolog (yeast)	2.28765e-05	0.0010752	1.65323
PATH:03008	Ribosome biogenesis in eukaryotes	UTP4	CIRH1A	cirrhosis, autosomal recessive 1A (cirhin)	2.28765e-05	0.0010752	1.65323
PATH:03008	Ribosome biogenesis in eukaryotes	LSG1	LSG1	large 60S subunit nuclear export GTPase 1	2.28765e-05	0.0010752	1.65323
PATH:03008	Ribosome biogenesis in eukaryotes	REXO2	REXO2	RNA exonuclease 2	2.28765e-05	0.0010752	1.65323
PATH:03008	Ribosome biogenesis in eukaryotes	RIOK1	RIOK1	RIO kinase 1	2.28765e-05	0.0010752	1.65323
PATH:03008	Ribosome biogenesis in eukaryotes	NHP2	NHP2	NHP2 ribonucleoprotein	2.28765e-05	0.0010752	1.65323
PATH:03008	Ribosome biogenesis in eukaryotes	HEATR1	HEATR1	HEAT repeat containing 1	2.28765e-05	0.0010752	1.65323
PATH:03008	Ribosome biogenesis in eukaryotes	NAT10	NAT10	N-acetyltransferase 10 (GCN5-related)	2.28765e-05	0.0010752	1.65323
PATH:03008	Ribosome biogenesis in eukaryotes	WDR75	WDR75	WD repeat domain 75	2.28765e-05	0.0010752	1.65323
PATH:03008	Ribosome biogenesis in eukaryotes	FCF1	FCF1	FCF1 rRNA-processing protein	2.28765e-05	0.0010752	1.65323
PATH:03008	Ribosome biogenesis in eukaryotes	EIF6	EIF6	eukaryotic translation initiation factor 6	2.28765e-05	0.0010752	1.65323
PATH:03008	Ribosome biogenesis in eukaryotes	RAN	RAN	RAN, member RAS oncogene family	2.28765e-05	0.0010752	1.65323
PATH:03008	Ribosome biogenesis in eukaryotes	UTP6	UTP6	UTP6, small subunit (SSU) processome component, homolog (yeast)	2.28765e-05	0.0010752	1.65323
PATH:03008	Ribosome biogenesis in eukaryotes	NOB1	NOB1	NIN1/RPN12 binding protein 1 homolog (S. cerevisiae)	2.28765e-05	0.0010752	1.65323
PATH:03008	Ribosome biogenesis in eukaryotes	MDN1	MDN1	MDN1, midasin homolog (yeast)	2.28765e-05	0.0010752	1.65323
PATH:03008	Ribosome biogenesis in eukaryotes	IMP3	IMP3	IMP3, U3 small nucleolar ribonucleoprotein	2.28765e-05	0.0010752	1.65323
PATH:03008	Ribosome biogenesis in eukaryotes	GNL3	GNL3	guanine nucleotide binding protein-like 3 (nucleolar)	2.28765e-05	0.0010752	1.65323
PATH:03008	Ribosome biogenesis in eukaryotes	GAR1	GAR1	GAR1 ribonucleoprotein	2.28765e-05	0.0010752	1.65323
PATH:03008	Ribosome biogenesis in eukaryotes	SNU13	SNU13	NHP2 non-histone chromosome protein 2-like 1 (S. cerevisiae)	2.28765e-05	0.0010752	1.65323
PATH:03008	Ribosome biogenesis in eukaryotes	XRN1	XRN1	5'-3' exoribonuclease 1	2.28765e-05	0.0010752	1.65323
PATH:03008	Ribosome biogenesis in eukaryotes	IMP4	IMP4	IMP4, U3 small nucleolar ribonucleoprotein	2.28765e-05	0.0010752	1.65323
PATH:03008	Ribosome biogenesis in eukaryotes	DKC1	DKC1	dyskeratosis congenita 1, dyskerin	2.28765e-05	0.0010752	1.65323
PATH:03008	Ribosome biogenesis in eukaryotes	MPHOSPH10	MPHOSPH10	M-phase phosphoprotein 10 (U3 small nucleolar ribonucleoprotein)	2.28765e-05	0.0010752	1.65323
PATH:03008	Ribosome biogenesis in eukaryotes	NOP10	NOP10	NOP10 ribonucleoprotein	2.28765e-05	0.0010752	1.65323
PATH:03008	Ribosome biogenesis in eukaryotes	XRN2	XRN2	5'-3' exoribonuclease 2	2.28765e-05	0.0010752	1.65323
PATH:03008	Ribosome biogenesis in eukaryotes	WDR43	WDR43	WD repeat domain 43	2.28765e-05	0.0010752	1.65323
PATH:03008	Ribosome biogenesis in eukaryotes	NXF1	NXF1	nuclear RNA export factor 1	2.28765e-05	0.0010752	1.65323
PATH:04146	Peroxisome	NUDT7	NUDT7	nudix (nucleoside diphosphate linked moiety X)-type motif 7	5.07078e-05	0.00182967	1.5988
PATH:04146	Peroxisome	IDH1	IDH1	isocitrate dehydrogenase 1 (NADP+), soluble	5.07078e-05	0.00182967	1.5988
PATH:04146	Peroxisome	PHYH	PHYH	phytanoyl-CoA 2-hydroxylase	5.07078e-05	0.00182967	1.5988
PATH:04146	Peroxisome	PEX1	PEX1	peroxisomal biogenesis factor 1	5.07078e-05	0.00182967	1.5988
PATH:04146	Peroxisome	PXMP2	PXMP2	peroxisomal membrane protein 2, 22kDa	5.07078e-05	0.00182967	1.5988
PATH:04146	Peroxisome	ACOX2	ACOX2	acyl-CoA oxidase 2, branched chain	5.07078e-05	0.00182967	1.5988
PATH:04146	Peroxisome	ACAA1	ACAA1	acetyl-CoA acyltransferase 1	5.07078e-05	0.00182967	1.5988
PATH:04146	Peroxisome	HSD17B4	HSD17B4	hydroxysteroid (17-beta) dehydrogenase 4	5.07078e-05	0.00182967	1.5988
PATH:04146	Peroxisome	ACSL5	ACSL5	acyl-CoA synthetase long-chain family member 5	5.07078e-05	0.00182967	1.5988
PATH:04146	Peroxisome	SOD1	SOD1	superoxide dismutase 1, soluble	5.07078e-05	0.00182967	1.5988
PATH:04146	Peroxisome	ACOX1	ACOX1	acyl-CoA oxidase 1, palmitoyl	5.07078e-05	0.00182967	1.5988
PATH:04146	Peroxisome	EPHX2	EPHX2	epoxide hydrolase 2, cytoplasmic	5.07078e-05	0.00182967	1.5988
PATH:04146	Peroxisome	AGPS	AGPS	alkylglycerone phosphate synthase	5.07078e-05	0.00182967	1.5988
PATH:04146	Peroxisome	ACSL3	ACSL3	acyl-CoA synthetase long-chain family member 3	5.07078e-05	0.00182967	1.5988
PATH:04146	Peroxisome	PEX5	PEX5	peroxisomal biogenesis factor 5	5.07078e-05	0.00182967	1.5988
PATH:04146	Peroxisome	GSTK1	GSTK1	glutathione S-transferase kappa 1	5.07078e-05	0.00182967	1.5988
PATH:04146	Peroxisome	AGXT	AGXT	alanine-glyoxylate aminotransferase	5.07078e-05	0.00182967	1.5988
PATH:04146	Peroxisome	CROT	CROT	carnitine O-octanoyltransferase	5.07078e-05	0.00182967	1.5988
PATH:04146	Peroxisome	ECI2	ECI2	enoyl-CoA delta isomerase 2	5.07078e-05	0.00182967	1.5988
PATH:04146	Peroxisome	PEX19	PEX19	peroxisomal biogenesis factor 19	5.07078e-05	0.00182967	1.5988
PATH:04146	Peroxisome	GNPAT	GNPAT	glyceronephosphate O-acyltransferase	5.07078e-05	0.00182967	1.5988
PATH:04146	Peroxisome	PMVK	PMVK	phosphomevalonate kinase	5.07078e-05	0.00182967	1.5988
PATH:04146	Peroxisome	ACSL4	ACSL4	acyl-CoA synthetase long-chain family member 4	5.07078e-05	0.00182967	1.5988
PATH:04146	Peroxisome	PXMP4	PXMP4	peroxisomal membrane protein 4, 24kDa	5.07078e-05	0.00182967	1.5988
PATH:04146	Peroxisome	MVK	MVK	mevalonate kinase	5.07078e-05	0.00182967	1.5988
PATH:04146	Peroxisome	EHHADH	EHHADH	enoyl-CoA, hydratase/3-hydroxyacyl CoA dehydrogenase	5.07078e-05	0.00182967	1.5988
PATH:04146	Peroxisome	PRDX1	PRDX1	peroxiredoxin 1	5.07078e-05	0.00182967	1.5988
PATH:04146	Peroxisome	NUDT12	NUDT12	nudix (nucleoside diphosphate linked moiety X)-type motif 12	5.07078e-05	0.00182967	1.5988
PATH:04146	Peroxisome	ACSL1	ACSL1	acyl-CoA synthetase long-chain family member 1	5.07078e-05	0.00182967	1.5988
PATH:04146	Peroxisome	NUDT19	NUDT19	nudix (nucleoside diphosphate linked moiety X)-type motif 19	5.07078e-05	0.00182967	1.5988
PATH:04146	Peroxisome	PRDX5	PRDX5	peroxiredoxin 5	5.07078e-05	0.00182967	1.5988
PATH:04146	Peroxisome	DAO	DAO	D-amino-acid oxidase	5.07078e-05	0.00182967	1.5988
PATH:04146	Peroxisome	IDH2	IDH2	isocitrate dehydrogenase 2 (NADP+), mitochondrial	5.07078e-05	0.00182967	1.5988
PATH:04146	Peroxisome	ABCD4	ABCD4	ATP-binding cassette, sub-family D (ALD), member 4	5.07078e-05	0.00182967	1.5988
PATH:04146	Peroxisome	HMGCL	HMGCL	3-hydroxymethyl-3-methylglutaryl-CoA lyase	5.07078e-05	0.00182967	1.5988
PATH:04146	Peroxisome	MPV17L2	MPV17L2	MPV17 mitochondrial membrane protein-like 2	5.07078e-05	0.00182967	1.5988
PATH:04146	Peroxisome	PEX13	PEX13	peroxisomal biogenesis factor 13	5.07078e-05	0.00182967	1.5988
PATH:04146	Peroxisome	ABCD1	ABCD1	ATP-binding cassette, sub-family D (ALD), member 1	5.07078e-05	0.00182967	1.5988
PATH:04146	Peroxisome	PEX7	PEX7	peroxisomal biogenesis factor 7	5.07078e-05	0.00182967	1.5988
PATH:04146	Peroxisome	SOD2	SOD2	superoxide dismutase 2, mitochondrial	5.07078e-05	0.00182967	1.5988
PATH:04146	Peroxisome	ABCD3	ABCD3	ATP-binding cassette, sub-family D (ALD), member 3	5.07078e-05	0.00182967	1.5988
PATH:04146	Peroxisome	PIPOX	PIPOX	pipecolic acid oxidase	5.07078e-05	0.00182967	1.5988
PATH:04146	Peroxisome	MPV17	MPV17	MpV17 mitochondrial inner membrane protein	5.07078e-05	0.00182967	1.5988
PATH:04146	Peroxisome	MPV17L	MPV17L	MPV17 mitochondrial membrane protein-like	5.07078e-05	0.00182967	1.5988
PATH:04146	Peroxisome	SCP2	SCP2	sterol carrier protein 2	5.07078e-05	0.00182967	1.5988
PATH:04146	Peroxisome	CAT	CAT	catalase	5.07078e-05	0.00182967	1.5988
PATH:04146	Peroxisome	PECR	PECR	peroxisomal trans-2-enoyl-CoA reductase	5.07078e-05	0.00182967	1.5988
PATH:00250	Alanine, aspartate and glutamate metabolism	GOT1	GOT1	glutamic-oxaloacetic transaminase 1, soluble	5.19056e-05	0.00182967	1.91346
PATH:00250	Alanine, aspartate and glutamate metabolism	NAT8L	NAT8L	N-acetyltransferase 8-like (GCN5-related, putative)	5.19056e-05	0.00182967	1.91346
PATH:00250	Alanine, aspartate and glutamate metabolism	GPT2	GPT2	glutamic pyruvate transaminase (alanine aminotransferase) 2	5.19056e-05	0.00182967	1.91346
PATH:00250	Alanine, aspartate and glutamate metabolism	GPT	GPT	glutamic-pyruvate transaminase (alanine aminotransferase)	5.19056e-05	0.00182967	1.91346
PATH:00250	Alanine, aspartate and glutamate metabolism	ASL	ASL	argininosuccinate lyase	5.19056e-05	0.00182967	1.91346
PATH:00250	Alanine, aspartate and glutamate metabolism	GAD1	GAD1	glutamate decarboxylase 1 (brain, 67kDa)	5.19056e-05	0.00182967	1.91346
PATH:00250	Alanine, aspartate and glutamate metabolism	GLUD1	GLUD1	glutamate dehydrogenase 1	5.19056e-05	0.00182967	1.91346
PATH:00250	Alanine, aspartate and glutamate metabolism	AGXT	AGXT	alanine-glyoxylate aminotransferase	5.19056e-05	0.00182967	1.91346
PATH:00250	Alanine, aspartate and glutamate metabolism	RIMKLB	RIMKLB	ribosomal modification protein rimK-like family member B	5.19056e-05	0.00182967	1.91346
PATH:00250	Alanine, aspartate and glutamate metabolism	RIMKLA	RIMKLA	ribosomal modification protein rimK-like family member A	5.19056e-05	0.00182967	1.91346
PATH:00250	Alanine, aspartate and glutamate metabolism	ACY3	ACY3	aspartoacylase (aminocyclase) 3	5.19056e-05	0.00182967	1.91346
PATH:00250	Alanine, aspartate and glutamate metabolism	ALDH4A1	ALDH4A1	aldehyde dehydrogenase 4 family, member A1	5.19056e-05	0.00182967	1.91346
PATH:00250	Alanine, aspartate and glutamate metabolism	ALDH5A1	ALDH5A1	aldehyde dehydrogenase 5 family, member A1	5.19056e-05	0.00182967	1.91346
PATH:00250	Alanine, aspartate and glutamate metabolism	ADSSL1	ADSSL1	adenylosuccinate synthase like 1	5.19056e-05	0.00182967	1.91346
PATH:00250	Alanine, aspartate and glutamate metabolism	NIT2	NIT2	nitrilase family, member 2	5.19056e-05	0.00182967	1.91346
PATH:00250	Alanine, aspartate and glutamate metabolism	PPAT	PPAT	phosphoribosyl pyrophosphate amidotransferase	5.19056e-05	0.00182967	1.91346
PATH:00250	Alanine, aspartate and glutamate metabolism	CAD	CAD	carbamoyl-phosphate synthetase 2, aspartate transcarbamylase, and dihydroorotase	5.19056e-05	0.00182967	1.91346
PATH:00250	Alanine, aspartate and glutamate metabolism	GFPT1	GFPT1	glutamine--fructose-6-phosphate transaminase 1	5.19056e-05	0.00182967	1.91346
PATH:00250	Alanine, aspartate and glutamate metabolism	ASS1	ASS1	argininosuccinate synthase 1	5.19056e-05	0.00182967	1.91346
PATH:00250	Alanine, aspartate and glutamate metabolism	GOT2	GOT2	glutamic-oxaloacetic transaminase 2, mitochondrial	5.19056e-05	0.00182967	1.91346
PATH:00250	Alanine, aspartate and glutamate metabolism	GLUD2	GLUD2	glutamate dehydrogenase 2	5.19056e-05	0.00182967	1.91346
PATH:00250	Alanine, aspartate and glutamate metabolism	GFPT2	GFPT2	glutamine-fructose-6-phosphate transaminase 2	5.19056e-05	0.00182967	1.91346
PATH:00250	Alanine, aspartate and glutamate metabolism	ASNS	ASNS	asparagine synthetase (glutamine-hydrolyzing)	5.19056e-05	0.00182967	1.91346
PATH:00250	Alanine, aspartate and glutamate metabolism	GLUL	GLUL	glutamate-ammonia ligase	5.19056e-05	0.00182967	1.91346
PATH:00250	Alanine, aspartate and glutamate metabolism	AGXT2	AGXT2	alanine--glyoxylate aminotransferase 2	5.19056e-05	0.00182967	1.91346
PATH:01230	Biosynthesis of amino acids	NAGS	NAGS	N-acetylglutamate synthase	6.44274e-05	0.00201873	1.62303
PATH:01230	Biosynthesis of amino acids	GOT1	GOT1	glutamic-oxaloacetic transaminase 1, soluble	6.44274e-05	0.00201873	1.62303
PATH:01230	Biosynthesis of amino acids	PC	PC	pyruvate carboxylase	6.44274e-05	0.00201873	1.62303
PATH:01230	Biosynthesis of amino acids	ACO1	ACO1	aconitase 1, soluble	6.44274e-05	0.00201873	1.62303
PATH:01230	Biosynthesis of amino acids	IDH1	IDH1	isocitrate dehydrogenase 1 (NADP+), soluble	6.44274e-05	0.00201873	1.62303
PATH:01230	Biosynthesis of amino acids	GPT2	GPT2	glutamic pyruvate transaminase (alanine aminotransferase) 2	6.44274e-05	0.00201873	1.62303
PATH:01230	Biosynthesis of amino acids	ENO1	ENO1	enolase 1, (alpha)	6.44274e-05	0.00201873	1.62303
PATH:01230	Biosynthesis of amino acids	GPT	GPT	glutamic-pyruvate transaminase (alanine aminotransferase)	6.44274e-05	0.00201873	1.62303
PATH:01230	Biosynthesis of amino acids	ASL	ASL	argininosuccinate lyase	6.44274e-05	0.00201873	1.62303
PATH:01230	Biosynthesis of amino acids	PGAM2	PGAM2	phosphoglycerate mutase 2 (muscle)	6.44274e-05	0.00201873	1.62303
PATH:01230	Biosynthesis of amino acids	PSPH	PSPH	phosphoserine phosphatase	6.44274e-05	0.00201873	1.62303
PATH:01230	Biosynthesis of amino acids	PAH	PAH	phenylalanine hydroxylase	6.44274e-05	0.00201873	1.62303
PATH:01230	Biosynthesis of amino acids	SHMT2	SHMT2	serine hydroxymethyltransferase 2 (mitochondrial)	6.44274e-05	0.00201873	1.62303
PATH:01230	Biosynthesis of amino acids	PFKM	PFKM	phosphofructokinase, muscle	6.44274e-05	0.00201873	1.62303
PATH:01230	Biosynthesis of amino acids	CTH	CTH	cystathionine gamma-lyase	6.44274e-05	0.00201873	1.62303
PATH:01230	Biosynthesis of amino acids	ALDH18A1	ALDH18A1	aldehyde dehydrogenase 18 family, member A1	6.44274e-05	0.00201873	1.62303
PATH:01230	Biosynthesis of amino acids	AC093512.2	ALDOA	aldolase A, fructose-bisphosphate	6.44274e-05	0.00201873	1.62303
PATH:01230	Biosynthesis of amino acids	ENO3	ENO3	enolase 3 (beta, muscle)	6.44274e-05	0.00201873	1.62303
PATH:01230	Biosynthesis of amino acids	MAT1A	MAT1A	methionine adenosyltransferase I, alpha	6.44274e-05	0.00201873	1.62303
PATH:01230	Biosynthesis of amino acids	GAPDH	GAPDH	glyceraldehyde-3-phosphate dehydrogenase	6.44274e-05	0.00201873	1.62303
PATH:01230	Biosynthesis of amino acids	ARG1	ARG1	arginase 1	6.44274e-05	0.00201873	1.62303
PATH:01230	Biosynthesis of amino acids	ACO2	ACO2	aconitase 2, mitochondrial	6.44274e-05	0.00201873	1.62303
PATH:01230	Biosynthesis of amino acids	TALDO1	TALDO1	transaldolase 1	6.44274e-05	0.00201873	1.62303
PATH:01230	Biosynthesis of amino acids	PYCR2	PYCR2	pyrroline-5-carboxylate reductase family, member 2	6.44274e-05	0.00201873	1.62303
PATH:01230	Biosynthesis of amino acids	BCAT1	BCAT1	branched chain amino-acid transaminase 1, cytosolic	6.44274e-05	0.00201873	1.62303
PATH:01230	Biosynthesis of amino acids	IDH2	IDH2	isocitrate dehydrogenase 2 (NADP+), mitochondrial	6.44274e-05	0.00201873	1.62303
PATH:01230	Biosynthesis of amino acids	PRPS1	PRPS1	phosphoribosyl pyrophosphate synthetase 1	6.44274e-05	0.00201873	1.62303
PATH:01230	Biosynthesis of amino acids	PGAM1	PGAM1	phosphoglycerate mutase 1 (brain)	6.44274e-05	0.00201873	1.62303
PATH:01230	Biosynthesis of amino acids	PHGDH	PHGDH	phosphoglycerate dehydrogenase	6.44274e-05	0.00201873	1.62303
PATH:01230	Biosynthesis of amino acids	PSAT1	PSAT1	phosphoserine aminotransferase 1	6.44274e-05	0.00201873	1.62303
PATH:01230	Biosynthesis of amino acids	ASS1	ASS1	argininosuccinate synthase 1	6.44274e-05	0.00201873	1.62303
PATH:01230	Biosynthesis of amino acids	MTR	MTR	5-methyltetrahydrofolate-homocysteine methyltransferase	6.44274e-05	0.00201873	1.62303
PATH:01230	Biosynthesis of amino acids	GOT2	GOT2	glutamic-oxaloacetic transaminase 2, mitochondrial	6.44274e-05	0.00201873	1.62303
PATH:01230	Biosynthesis of amino acids	OTC	OTC	ornithine carbamoyltransferase	6.44274e-05	0.00201873	1.62303
PATH:01230	Biosynthesis of amino acids	TPI1	TPI1	triosephosphate isomerase 1	6.44274e-05	0.00201873	1.62303
PATH:01230	Biosynthesis of amino acids	ENO2	ENO2	enolase 2 (gamma, neuronal)	6.44274e-05	0.00201873	1.62303
PATH:01230	Biosynthesis of amino acids	PGK1	PGK1	phosphoglycerate kinase 1	6.44274e-05	0.00201873	1.62303
PATH:01230	Biosynthesis of amino acids	PKM	PKM	pyruvate kinase, muscle	6.44274e-05	0.00201873	1.62303
PATH:01230	Biosynthesis of amino acids	TKT	TKT	transketolase	6.44274e-05	0.00201873	1.62303
PATH:01230	Biosynthesis of amino acids	PYCR1	PYCR1	pyrroline-5-carboxylate reductase 1	6.44274e-05	0.00201873	1.62303
PATH:01230	Biosynthesis of amino acids	GLUL	GLUL	glutamate-ammonia ligase	6.44274e-05	0.00201873	1.62303
PATH:01230	Biosynthesis of amino acids	TAT	TAT	tyrosine aminotransferase	6.44274e-05	0.00201873	1.62303
PATH:01230	Biosynthesis of amino acids	IDH3B	IDH3B	isocitrate dehydrogenase 3 (NAD+) beta	6.44274e-05	0.00201873	1.62303
PATH:04610	Complement and coagulation cascades	MASP1	MASP1	mannan-binding lectin serine peptidase 1 (C4/C2 activating component of Ra-reactive factor)	0.000186687	0.00526458	1.59732
PATH:04610	Complement and coagulation cascades	FGG	FGG	fibrinogen gamma chain	0.000186687	0.00526458	1.59732
PATH:04610	Complement and coagulation cascades	F11	F11	coagulation factor XI	0.000186687	0.00526458	1.59732
PATH:04610	Complement and coagulation cascades	F10	F10	coagulation factor X	0.000186687	0.00526458	1.59732
PATH:04610	Complement and coagulation cascades	C8B	C8B	complement component 8, beta polypeptide	0.000186687	0.00526458	1.59732
PATH:04610	Complement and coagulation cascades	CPB2	CPB2	carboxypeptidase B2 (plasma)	0.000186687	0.00526458	1.59732
PATH:04610	Complement and coagulation cascades	SERPINC1	SERPINC1	serpin peptidase inhibitor, clade C (antithrombin), member 1	0.000186687	0.00526458	1.59732
PATH:04610	Complement and coagulation cascades	PROC	PROC	protein C (inactivator of coagulation factors Va and VIIIa)	0.000186687	0.00526458	1.59732
PATH:04610	Complement and coagulation cascades	PLAU	PLAU	plasminogen activator, urokinase	0.000186687	0.00526458	1.59732
PATH:04610	Complement and coagulation cascades	A2M	A2M	alpha-2-macroglobulin	0.000186687	0.00526458	1.59732
PATH:04610	Complement and coagulation cascades	PROS1	PROS1	protein S (alpha)	0.000186687	0.00526458	1.59732
PATH:04610	Complement and coagulation cascades	C7	C7	complement component 7	0.000186687	0.00526458	1.59732
PATH:04610	Complement and coagulation cascades	CD59	CD59	CD59 molecule, complement regulatory protein	0.000186687	0.00526458	1.59732
PATH:04610	Complement and coagulation cascades	SERPING1	SERPING1	serpin peptidase inhibitor, clade G (C1 inhibitor), member 1	0.000186687	0.00526458	1.59732
PATH:04610	Complement and coagulation cascades	C4BPA	C4BPA	complement component 4 binding protein, alpha	0.000186687	0.00526458	1.59732
PATH:04610	Complement and coagulation cascades	F13B	F13B	coagulation factor XIII, B polypeptide	0.000186687	0.00526458	1.59732
PATH:04610	Complement and coagulation cascades	FGA	FGA	fibrinogen alpha chain	0.000186687	0.00526458	1.59732
PATH:04610	Complement and coagulation cascades	F2	F2	coagulation factor II (thrombin)	0.000186687	0.00526458	1.59732
PATH:04610	Complement and coagulation cascades	F12	F12	coagulation factor XII (Hageman factor)	0.000186687	0.00526458	1.59732
PATH:04610	Complement and coagulation cascades	F5	F5	coagulation factor V (proaccelerin, labile factor)	0.000186687	0.00526458	1.59732
PATH:04610	Complement and coagulation cascades	C4BPB	C4BPB	complement component 4 binding protein, beta	0.000186687	0.00526458	1.59732
PATH:04610	Complement and coagulation cascades	SERPINA1	SERPINA1	serpin peptidase inhibitor, clade A (alpha-1 antiproteinase, antitrypsin), member 1	0.000186687	0.00526458	1.59732
PATH:04610	Complement and coagulation cascades	C8A	C8A	complement component 8, alpha polypeptide	0.000186687	0.00526458	1.59732
PATH:04610	Complement and coagulation cascades	C5	C5	complement component 5	0.000186687	0.00526458	1.59732
PATH:04610	Complement and coagulation cascades	SERPINF2	SERPINF2	serpin peptidase inhibitor, clade F (alpha-2 antiplasmin, pigment epithelium derived factor), member 2	0.000186687	0.00526458	1.59732
PATH:04610	Complement and coagulation cascades	CFH	CFH	complement factor H	0.000186687	0.00526458	1.59732
PATH:04610	Complement and coagulation cascades	C6	C6	complement component 6	0.000186687	0.00526458	1.59732
PATH:04610	Complement and coagulation cascades	CFI	CFI	complement factor I	0.000186687	0.00526458	1.59732
PATH:04610	Complement and coagulation cascades	FGB	FGB	fibrinogen beta chain	0.000186687	0.00526458	1.59732
PATH:04610	Complement and coagulation cascades	KLKB1	KLKB1	kallikrein B, plasma (Fletcher factor) 1	0.000186687	0.00526458	1.59732
PATH:04610	Complement and coagulation cascades	F2R	F2R	coagulation factor II (thrombin) receptor	0.000186687	0.00526458	1.59732
PATH:04610	Complement and coagulation cascades	TFPI	TFPI	tissue factor pathway inhibitor (lipoprotein-associated coagulation inhibitor)	0.000186687	0.00526458	1.59732
PATH:04610	Complement and coagulation cascades	MBL2	MBL2	mannose-binding lectin (protein C) 2, soluble	0.000186687	0.00526458	1.59732
PATH:04610	Complement and coagulation cascades	C3	C3	complement component 3	0.000186687	0.00526458	1.59732
PATH:04610	Complement and coagulation cascades	F7	F7	coagulation factor VII (serum prothrombin conversion accelerator)	0.000186687	0.00526458	1.59732
PATH:04610	Complement and coagulation cascades	PLG	PLG	plasminogen	0.000186687	0.00526458	1.59732
PATH:04610	Complement and coagulation cascades	SERPINA5	SERPINA5	serpin peptidase inhibitor, clade A (alpha-1 antiproteinase, antitrypsin), member 5	0.000186687	0.00526458	1.59732
PATH:04610	Complement and coagulation cascades	SERPINE1	SERPINE1	serpin peptidase inhibitor, clade E (nexin, plasminogen activator inhibitor type 1), member 1	0.000186687	0.00526458	1.59732
PATH:04610	Complement and coagulation cascades	KNG1	KNG1	kininogen 1	0.000186687	0.00526458	1.59732
PATH:04610	Complement and coagulation cascades	SERPIND1	SERPIND1	serpin peptidase inhibitor, clade D (heparin cofactor), member 1	0.000186687	0.00526458	1.59732
PATH:00330	Arginine and proline metabolism	NAGS	NAGS	N-acetylglutamate synthase	0.000251584	0.00644969	1.63455
PATH:00330	Arginine and proline metabolism	GOT1	GOT1	glutamic-oxaloacetic transaminase 1, soluble	0.000251584	0.00644969	1.63455
PATH:00330	Arginine and proline metabolism	AMD1	AMD1	adenosylmethionine decarboxylase 1	0.000251584	0.00644969	1.63455
PATH:00330	Arginine and proline metabolism	MAOA	MAOA	monoamine oxidase A	0.000251584	0.00644969	1.63455
PATH:00330	Arginine and proline metabolism	ASL	ASL	argininosuccinate lyase	0.000251584	0.00644969	1.63455
PATH:00330	Arginine and proline metabolism	SMOX	SMOX	spermine oxidase	0.000251584	0.00644969	1.63455
PATH:00330	Arginine and proline metabolism	SAT2	SAT2	spermidine/spermine N1-acetyltransferase family member 2	0.000251584	0.00644969	1.63455
PATH:00330	Arginine and proline metabolism	CKB	CKB	creatine kinase, brain	0.000251584	0.00644969	1.63455
PATH:00330	Arginine and proline metabolism	ODC1	ODC1	ornithine decarboxylase 1	0.000251584	0.00644969	1.63455
PATH:00330	Arginine and proline metabolism	GLUD1	GLUD1	glutamate dehydrogenase 1	0.000251584	0.00644969	1.63455
PATH:00330	Arginine and proline metabolism	ALDH18A1	ALDH18A1	aldehyde dehydrogenase 18 family, member A1	0.000251584	0.00644969	1.63455
PATH:00330	Arginine and proline metabolism	LAP3	LAP3	leucine aminopeptidase 3	0.000251584	0.00644969	1.63455
PATH:00330	Arginine and proline metabolism	MAOB	MAOB	monoamine oxidase B	0.000251584	0.00644969	1.63455
PATH:00330	Arginine and proline metabolism	CNDP2	CNDP2	CNDP dipeptidase 2 (metallopeptidase M20 family)	0.000251584	0.00644969	1.63455
PATH:00330	Arginine and proline metabolism	ALDH4A1	ALDH4A1	aldehyde dehydrogenase 4 family, member A1	0.000251584	0.00644969	1.63455
PATH:00330	Arginine and proline metabolism	ARG1	ARG1	arginase 1	0.000251584	0.00644969	1.63455
PATH:00330	Arginine and proline metabolism	ALDH9A1	ALDH9A1	aldehyde dehydrogenase 9 family, member A1	0.000251584	0.00644969	1.63455
PATH:00330	Arginine and proline metabolism	P4HA1	P4HA1	prolyl 4-hydroxylase, alpha polypeptide I	0.000251584	0.00644969	1.63455
PATH:00330	Arginine and proline metabolism	PYCR2	PYCR2	pyrroline-5-carboxylate reductase family, member 2	0.000251584	0.00644969	1.63455
PATH:00330	Arginine and proline metabolism	DAO	DAO	D-amino-acid oxidase	0.000251584	0.00644969	1.63455
PATH:00330	Arginine and proline metabolism	AGMAT	AGMAT	agmatine ureohydrolase (agmatinase)	0.000251584	0.00644969	1.63455
PATH:00330	Arginine and proline metabolism	OAT	OAT	ornithine aminotransferase	0.000251584	0.00644969	1.63455
PATH:00330	Arginine and proline metabolism	ASS1	ASS1	argininosuccinate synthase 1	0.000251584	0.00644969	1.63455
PATH:00330	Arginine and proline metabolism	PRODH2	PRODH2	proline dehydrogenase (oxidase) 2	0.000251584	0.00644969	1.63455
PATH:00330	Arginine and proline metabolism	GOT2	GOT2	glutamic-oxaloacetic transaminase 2, mitochondrial	0.000251584	0.00644969	1.63455
PATH:00330	Arginine and proline metabolism	GLUD2	GLUD2	glutamate dehydrogenase 2	0.000251584	0.00644969	1.63455
PATH:00330	Arginine and proline metabolism	OTC	OTC	ornithine carbamoyltransferase	0.000251584	0.00644969	1.63455
PATH:00330	Arginine and proline metabolism	SMS	SMS	spermine synthase	0.000251584	0.00644969	1.63455
PATH:00330	Arginine and proline metabolism	SRM	SRM	spermidine synthase	0.000251584	0.00644969	1.63455
PATH:00330	Arginine and proline metabolism	GAMT	GAMT	guanidinoacetate N-methyltransferase	0.000251584	0.00644969	1.63455
PATH:00330	Arginine and proline metabolism	P4HA2	P4HA2	prolyl 4-hydroxylase, alpha polypeptide II	0.000251584	0.00644969	1.63455
PATH:00330	Arginine and proline metabolism	ALDH1B1	ALDH1B1	aldehyde dehydrogenase 1 family, member B1	0.000251584	0.00644969	1.63455
PATH:00330	Arginine and proline metabolism	PYCR1	PYCR1	pyrroline-5-carboxylate reductase 1	0.000251584	0.00644969	1.63455
PATH:00330	Arginine and proline metabolism	GLUL	GLUL	glutamate-ammonia ligase	0.000251584	0.00644969	1.63455
PATH:00330	Arginine and proline metabolism	ALDH3A2	ALDH3A2	aldehyde dehydrogenase 3 family, member A2	0.000251584	0.00644969	1.63455
PATH:00480	Glutathione metabolism	IDH1	IDH1	isocitrate dehydrogenase 1 (NADP+), soluble	0.000307246	0.00722028	1.67484
PATH:00480	Glutathione metabolism	GSTP1	GSTP1	glutathione S-transferase pi 1	0.000307246	0.00722028	1.67484
PATH:00480	Glutathione metabolism	GSTM1	GSTM1	glutathione S-transferase mu 1	0.000307246	0.00722028	1.67484
PATH:00480	Glutathione metabolism	GPX2	GPX2	glutathione peroxidase 2 (gastrointestinal)	0.000307246	0.00722028	1.67484
PATH:00480	Glutathione metabolism	GPX8	GPX8	glutathione peroxidase 8 (putative)	0.000307246	0.00722028	1.67484
PATH:00480	Glutathione metabolism	PGD	PGD	phosphogluconate dehydrogenase	0.000307246	0.00722028	1.67484
PATH:00480	Glutathione metabolism	RRM1	RRM1	ribonucleotide reductase M1	0.000307246	0.00722028	1.67484
PATH:00480	Glutathione metabolism	ODC1	ODC1	ornithine decarboxylase 1	0.000307246	0.00722028	1.67484
PATH:00480	Glutathione metabolism	GSTK1	GSTK1	glutathione S-transferase kappa 1	0.000307246	0.00722028	1.67484
PATH:00480	Glutathione metabolism	GSTO2	GSTO2	glutathione S-transferase omega 2	0.000307246	0.00722028	1.67484
PATH:00480	Glutathione metabolism	GPX3	GPX3	glutathione peroxidase 3 (plasma)	0.000307246	0.00722028	1.67484
PATH:00480	Glutathione metabolism	LAP3	LAP3	leucine aminopeptidase 3	0.000307246	0.00722028	1.67484
PATH:00480	Glutathione metabolism	GSTM3	GSTM3	glutathione S-transferase mu 3 (brain)	0.000307246	0.00722028	1.67484
PATH:00480	Glutathione metabolism	GSTA4	GSTA4	glutathione S-transferase alpha 4	0.000307246	0.00722028	1.67484
PATH:00480	Glutathione metabolism	GGT1	GGT1	gamma-glutamyltransferase 1	0.000307246	0.00722028	1.67484
PATH:00480	Glutathione metabolism	GSR	GSR	glutathione reductase	0.000307246	0.00722028	1.67484
PATH:00480	Glutathione metabolism	IDH2	IDH2	isocitrate dehydrogenase 2 (NADP+), mitochondrial	0.000307246	0.00722028	1.67484
PATH:00480	Glutathione metabolism	GCLC	GCLC	glutamate-cysteine ligase, catalytic subunit	0.000307246	0.00722028	1.67484
PATH:00480	Glutathione metabolism	MGST2	MGST2	microsomal glutathione S-transferase 2	0.000307246	0.00722028	1.67484
PATH:00480	Glutathione metabolism	GCLM	GCLM	glutamate-cysteine ligase, modifier subunit	0.000307246	0.00722028	1.67484
PATH:00480	Glutathione metabolism	GPX7	GPX7	glutathione peroxidase 7	0.000307246	0.00722028	1.67484
PATH:00480	Glutathione metabolism	GGT7	GGT7	gamma-glutamyltransferase 7	0.000307246	0.00722028	1.67484
PATH:00480	Glutathione metabolism	SMS	SMS	spermine synthase	0.000307246	0.00722028	1.67484
PATH:00480	Glutathione metabolism	SRM	SRM	spermidine synthase	0.000307246	0.00722028	1.67484
PATH:00480	Glutathione metabolism	GSTM2	GSTM2	glutathione S-transferase mu 2 (muscle)	0.000307246	0.00722028	1.67484
PATH:00480	Glutathione metabolism	G6PD	G6PD	glucose-6-phosphate dehydrogenase	0.000307246	0.00722028	1.67484
PATH:00480	Glutathione metabolism	RRM2	RRM2	ribonucleotide reductase M2	0.000307246	0.00722028	1.67484
PATH:00480	Glutathione metabolism	GPX4	GPX4	glutathione peroxidase 4	0.000307246	0.00722028	1.67484
PATH:00480	Glutathione metabolism	GPX1	GPX1	glutathione peroxidase 1	0.000307246	0.00722028	1.67484
PATH:00480	Glutathione metabolism	MGST1	MGST1	microsomal glutathione S-transferase 1	0.000307246	0.00722028	1.67484
PATH:00480	Glutathione metabolism	GSTO1	GSTO1	glutathione S-transferase omega 1	0.000307246	0.00722028	1.67484
PATH:00260	Glycine, serine and threonine metabolism	MAOA	MAOA	monoamine oxidase A	0.000369304	0.00801105	1.76627
PATH:00260	Glycine, serine and threonine metabolism	PGAM2	PGAM2	phosphoglycerate mutase 2 (muscle)	0.000369304	0.00801105	1.76627
PATH:00260	Glycine, serine and threonine metabolism	PSPH	PSPH	phosphoserine phosphatase	0.000369304	0.00801105	1.76627
PATH:00260	Glycine, serine and threonine metabolism	GCAT	GCAT	glycine C-acetyltransferase	0.000369304	0.00801105	1.76627
PATH:00260	Glycine, serine and threonine metabolism	DMGDH	DMGDH	dimethylglycine dehydrogenase	0.000369304	0.00801105	1.76627
PATH:00260	Glycine, serine and threonine metabolism	SHMT2	SHMT2	serine hydroxymethyltransferase 2 (mitochondrial)	0.000369304	0.00801105	1.76627
PATH:00260	Glycine, serine and threonine metabolism	AGXT	AGXT	alanine-glyoxylate aminotransferase	0.000369304	0.00801105	1.76627
PATH:00260	Glycine, serine and threonine metabolism	GLYCTK	GLYCTK	glycerate kinase	0.000369304	0.00801105	1.76627
PATH:00260	Glycine, serine and threonine metabolism	CTH	CTH	cystathionine gamma-lyase	0.000369304	0.00801105	1.76627
PATH:00260	Glycine, serine and threonine metabolism	SARDH	SARDH	sarcosine dehydrogenase	0.000369304	0.00801105	1.76627
PATH:00260	Glycine, serine and threonine metabolism	DLD	DLD	dihydrolipoamide dehydrogenase	0.000369304	0.00801105	1.76627
PATH:00260	Glycine, serine and threonine metabolism	BHMT	BHMT	betaine--homocysteine S-methyltransferase	0.000369304	0.00801105	1.76627
PATH:00260	Glycine, serine and threonine metabolism	MAOB	MAOB	monoamine oxidase B	0.000369304	0.00801105	1.76627
PATH:00260	Glycine, serine and threonine metabolism	ALAS1	ALAS1	aminolevulinate, delta-, synthase 1	0.000369304	0.00801105	1.76627
PATH:00260	Glycine, serine and threonine metabolism	GLDC	GLDC	glycine dehydrogenase (decarboxylating)	0.000369304	0.00801105	1.76627
PATH:00260	Glycine, serine and threonine metabolism	GRHPR	GRHPR	glyoxylate reductase/hydroxypyruvate reductase	0.000369304	0.00801105	1.76627
PATH:00260	Glycine, serine and threonine metabolism	DAO	DAO	D-amino-acid oxidase	0.000369304	0.00801105	1.76627
PATH:00260	Glycine, serine and threonine metabolism	PGAM1	PGAM1	phosphoglycerate mutase 1 (brain)	0.000369304	0.00801105	1.76627
PATH:00260	Glycine, serine and threonine metabolism	PHGDH	PHGDH	phosphoglycerate dehydrogenase	0.000369304	0.00801105	1.76627
PATH:00260	Glycine, serine and threonine metabolism	PSAT1	PSAT1	phosphoserine aminotransferase 1	0.000369304	0.00801105	1.76627
PATH:00260	Glycine, serine and threonine metabolism	GAMT	GAMT	guanidinoacetate N-methyltransferase	0.000369304	0.00801105	1.76627
PATH:00260	Glycine, serine and threonine metabolism	CHDH	CHDH	choline dehydrogenase	0.000369304	0.00801105	1.76627
PATH:00260	Glycine, serine and threonine metabolism	PIPOX	PIPOX	pipecolic acid oxidase	0.000369304	0.00801105	1.76627
PATH:00260	Glycine, serine and threonine metabolism	AMT	AMT	aminomethyltransferase	0.000369304	0.00801105	1.76627
PATH:00260	Glycine, serine and threonine metabolism	AGXT2	AGXT2	alanine--glyoxylate aminotransferase 2	0.000369304	0.00801105	1.76627
PATH:00650	Butanoate metabolism	AACS	AACS	acetoacetyl-CoA synthetase	0.000683332	0.0137105	1.83692
PATH:00650	Butanoate metabolism	ECHS1	ECHS1	enoyl CoA hydratase, short chain, 1, mitochondrial	0.000683332	0.0137105	1.83692
PATH:00650	Butanoate metabolism	HADH	HADH	hydroxyacyl-CoA dehydrogenase	0.000683332	0.0137105	1.83692
PATH:00650	Butanoate metabolism	L2HGDH	L2HGDH	L-2-hydroxyglutarate dehydrogenase	0.000683332	0.0137105	1.83692
PATH:00650	Butanoate metabolism	GAD1	GAD1	glutamate decarboxylase 1 (brain, 67kDa)	0.000683332	0.0137105	1.83692
PATH:00650	Butanoate metabolism	PDHA1	PDHA1	pyruvate dehydrogenase (lipoamide) alpha 1	0.000683332	0.0137105	1.83692
PATH:00650	Butanoate metabolism	ACSM2A	ACSM2A	acyl-CoA synthetase medium-chain family member 2A	0.000683332	0.0137105	1.83692
PATH:00650	Butanoate metabolism	ACSM1	ACSM1	acyl-CoA synthetase medium-chain family member 1	0.000683332	0.0137105	1.83692
PATH:00650	Butanoate metabolism	ACSM2B	ACSM2B	acyl-CoA synthetase medium-chain family member 2B	0.000683332	0.0137105	1.83692
PATH:00650	Butanoate metabolism	ACSM3	ACSM3	acyl-CoA synthetase medium-chain family member 3	0.000683332	0.0137105	1.83692
PATH:00650	Butanoate metabolism	ACAT2	ACAT2	acetyl-CoA acetyltransferase 2	0.000683332	0.0137105	1.83692
PATH:00650	Butanoate metabolism	EHHADH	EHHADH	enoyl-CoA, hydratase/3-hydroxyacyl CoA dehydrogenase	0.000683332	0.0137105	1.83692
PATH:00650	Butanoate metabolism	OXCT1	OXCT1	3-oxoacid CoA transferase 1	0.000683332	0.0137105	1.83692
PATH:00650	Butanoate metabolism	ALDH5A1	ALDH5A1	aldehyde dehydrogenase 5 family, member A1	0.000683332	0.0137105	1.83692
PATH:00650	Butanoate metabolism	BDH2	BDH2	3-hydroxybutyrate dehydrogenase, type 2	0.000683332	0.0137105	1.83692
PATH:00650	Butanoate metabolism	HMGCL	HMGCL	3-hydroxymethyl-3-methylglutaryl-CoA lyase	0.000683332	0.0137105	1.83692
PATH:00650	Butanoate metabolism	AKR1B10	AKR1B10	aldo-keto reductase family 1, member B10 (aldose reductase)	0.000683332	0.0137105	1.83692
PATH:00650	Butanoate metabolism	HADHA	HADHA	hydroxyacyl-CoA dehydrogenase/3-ketoacyl-CoA thiolase/enoyl-CoA hydratase (trifunctional protein), alpha subunit	0.000683332	0.0137105	1.83692
PATH:00650	Butanoate metabolism	ACAT1	ACAT1	acetyl-CoA acetyltransferase 1	0.000683332	0.0137105	1.83692
PATH:00650	Butanoate metabolism	HMGCS1	HMGCS1	3-hydroxy-3-methylglutaryl-CoA synthase 1 (soluble)	0.000683332	0.0137105	1.83692
PATH:04520	Adherens junction	PTPRB	PTPRB	protein tyrosine phosphatase, receptor type, B	0.000729284	0.0137105	1.53977
PATH:04520	Adherens junction	CTNNB1	CTNNB1	catenin (cadherin-associated protein), beta 1, 88kDa	0.000729284	0.0137105	1.53977
PATH:04520	Adherens junction	RAC3	RAC3	ras-related C3 botulinum toxin substrate 3 (rho family, small GTP binding protein Rac3)	0.000729284	0.0137105	1.53977
PATH:04520	Adherens junction	CREBBP	CREBBP	CREB binding protein	0.000729284	0.0137105	1.53977
PATH:04520	Adherens junction	RHOA	RHOA	ras homolog family member A	0.000729284	0.0137105	1.53977
PATH:04520	Adherens junction	LMO7	LMO7	LIM domain 7	0.000729284	0.0137105	1.53977
PATH:04520	Adherens junction	SMAD3	SMAD3	SMAD family member 3	0.000729284	0.0137105	1.53977
PATH:04520	Adherens junction	SRC	SRC	SRC proto-oncogene, non-receptor tyrosine kinase	0.000729284	0.0137105	1.53977
PATH:04520	Adherens junction	IGF1R	IGF1R	insulin-like growth factor 1 receptor	0.000729284	0.0137105	1.53977
PATH:04520	Adherens junction	TGFBR1	TGFBR1	transforming growth factor, beta receptor 1	0.000729284	0.0137105	1.53977
PATH:04520	Adherens junction	NLK	NLK	nemo-like kinase	0.000729284	0.0137105	1.53977
PATH:04520	Adherens junction	PTPN6	PTPN6	protein tyrosine phosphatase, non-receptor type 6	0.000729284	0.0137105	1.53977
PATH:04520	Adherens junction	TGFBR2	TGFBR2	transforming growth factor, beta receptor II (70/80kDa)	0.000729284	0.0137105	1.53977
PATH:04520	Adherens junction	EP300	EP300	E1A binding protein p300	0.000729284	0.0137105	1.53977
PATH:04520	Adherens junction	WASF1	WASF1	WAS protein family, member 1	0.000729284	0.0137105	1.53977
PATH:04520	Adherens junction	SNAI1	SNAI1	snail family zinc finger 1	0.000729284	0.0137105	1.53977
PATH:04520	Adherens junction	ACTN1	ACTN1	actinin, alpha 1	0.000729284	0.0137105	1.53977
PATH:04520	Adherens junction	FGFR1	FGFR1	fibroblast growth factor receptor 1	0.000729284	0.0137105	1.53977
PATH:04520	Adherens junction	FER	FER	fer (fps/fes related) tyrosine kinase	0.000729284	0.0137105	1.53977
PATH:04520	Adherens junction	SMAD2	SMAD2	SMAD family member 2	0.000729284	0.0137105	1.53977
PATH:04520	Adherens junction	WASL	WASL	Wiskott-Aldrich syndrome-like	0.000729284	0.0137105	1.53977
PATH:04520	Adherens junction	MAPK1	MAPK1	mitogen-activated protein kinase 1	0.000729284	0.0137105	1.53977
PATH:04520	Adherens junction	YES1	YES1	YES proto-oncogene 1, Src family tyrosine kinase	0.000729284	0.0137105	1.53977
PATH:04520	Adherens junction	FYN	FYN	FYN proto-oncogene, Src family tyrosine kinase	0.000729284	0.0137105	1.53977
PATH:04520	Adherens junction	LEF1	LEF1	lymphoid enhancer-binding factor 1	0.000729284	0.0137105	1.53977
PATH:04520	Adherens junction	CTNNA1	CTNNA1	catenin (cadherin-associated protein), alpha 1, 102kDa	0.000729284	0.0137105	1.53977
PATH:04520	Adherens junction	WASF3	WASF3	WAS protein family, member 3	0.000729284	0.0137105	1.53977
PATH:04520	Adherens junction	IQGAP1	IQGAP1	IQ motif containing GTPase activating protein 1	0.000729284	0.0137105	1.53977
PATH:04520	Adherens junction	PTPRM	PTPRM	protein tyrosine phosphatase, receptor type, M	0.000729284	0.0137105	1.53977
PATH:04520	Adherens junction	CDH1	CDH1	cadherin 1, type 1, E-cadherin (epithelial)	0.000729284	0.0137105	1.53977
PATH:04520	Adherens junction	ACP1	ACP1	acid phosphatase 1, soluble	0.000729284	0.0137105	1.53977
PATH:04520	Adherens junction	SORBS1	SORBS1	sorbin and SH3 domain containing 1	0.000729284	0.0137105	1.53977
PATH:04520	Adherens junction	ACTG1	ACTG1	actin, gamma 1	0.000729284	0.0137105	1.53977
PATH:04520	Adherens junction	TCF7L2	TCF7L2	transcription factor 7-like 2 (T-cell specific, HMG-box)	0.000729284	0.0137105	1.53977
PATH:04520	Adherens junction	SSX2IP	SSX2IP	synovial sarcoma, X breakpoint 2 interacting protein	0.000729284	0.0137105	1.53977
PATH:04520	Adherens junction	PTPRF	PTPRF	protein tyrosine phosphatase, receptor type, F	0.000729284	0.0137105	1.53977
PATH:04520	Adherens junction	ACTB	ACTB	actin, beta	0.000729284	0.0137105	1.53977
PATH:04520	Adherens junction	PTPRJ	PTPRJ	protein tyrosine phosphatase, receptor type, J	0.000729284	0.0137105	1.53977
