# Supplementary material for: Targeting p300/CBP Attenuates Hepatocellular Carcinoma Progression through Epigenetic Regulation of Metabolism
Source: Oxford University Press journal article supplement (doi:10.1158/0008-5472.can-20-1323), 2020-12-23
Supplement: 00085472can201323-sup-241667_3_supp_6772395_ql0jt1.xlsx [file 00085472can201323-sup-241667_3_supp_6772395_ql0jt1.xlsx]

## Sheet: AllGO_Result
GOID	GOTerm	DifGene	AllDifGene	GeneInGO	AllGene	P-Value	FDR	Enrichment	(-log10P)
GO:0006810	transport	1638	13412	1852	16203	4.84705e-13	5.08746e-09	1.0685	12.3145
GO:0016310	phosphorylation	700	13412	767	16203	4.20616e-12	2.20739e-08	1.10257	11.3761
GO:0008152	metabolic process	1697	13412	1929	16203	1.35187e-11	4.72975e-08	1.0628	10.8691
GO:0015031	protein transport	587	13412	641	16203	5.04991e-11	1.2069e-07	1.10632	10.2967
GO:0045944	positive regulation of transcription from RNA polymerase II promoter	889	13412	989	16203	5.74936e-11	1.2069e-07	1.08594	10.2404

## Sheet: AllGO2Gene
GOID	GOTerm	QueryID	Symbol	Description	P-Value	FDR	Enrichment
GO:0006810	transport	TMED7	TMED7	transmembrane emp24 protein transport domain containing 7	4.84705e-13	5.08746e-09	1.0685
GO:0006810	transport	KCNT2	KCNT2	potassium channel, subfamily T, member 2	4.84705e-13	5.08746e-09	1.0685
GO:0006810	transport	AL031770.1	EXOC2	exocyst complex component 2	4.84705e-13	5.08746e-09	1.0685
GO:0006810	transport	CHRND	CHRND	cholinergic receptor, nicotinic, delta (muscle)	4.84705e-13	5.08746e-09	1.0685
GO:0006810	transport	SPIRE1	SPIRE1	spire-type actin nucleation factor 1	4.84705e-13	5.08746e-09	1.0685
GO:0006810	transport	SFT2D1	SFT2D1	SFT2 domain containing 1	4.84705e-13	5.08746e-09	1.0685
GO:0006810	transport	RAB8B	RAB8B	RAB8B, member RAS oncogene family	4.84705e-13	5.08746e-09	1.0685
GO:0006810	transport	HPX	HPX	hemopexin	4.84705e-13	5.08746e-09	1.0685
GO:0006810	transport	ZACN	ZACN	zinc activated ligand-gated ion channel	4.84705e-13	5.08746e-09	1.0685
GO:0006810	transport	ATCAY	ATCAY	ataxia, cerebellar, Cayman type	4.84705e-13	5.08746e-09	1.0685
GO:0006810	transport	AC013726.1	ATG16L1	autophagy related 16-like 1 (S. cerevisiae)	4.84705e-13	5.08746e-09	1.0685
GO:0006810	transport	SLC31A1	SLC31A1	solute carrier family 31 (copper transporter), member 1	4.84705e-13	5.08746e-09	1.0685
GO:0006810	transport	GPM6B	GPM6B	glycoprotein M6B	4.84705e-13	5.08746e-09	1.0685
GO:0006810	transport	SCN2B	SCN2B	sodium channel, voltage-gated, type II, beta subunit	4.84705e-13	5.08746e-09	1.0685
GO:0006810	transport	NACA2	NACA2	nascent polypeptide-associated complex alpha subunit 2	4.84705e-13	5.08746e-09	1.0685
GO:0006810	transport	STXBP2	STXBP2	syntaxin binding protein 2	4.84705e-13	5.08746e-09	1.0685
GO:0006810	transport	CACNA1G	CACNA1G	calcium channel, voltage-dependent, T type, alpha 1G subunit	4.84705e-13	5.08746e-09	1.0685
GO:0006810	transport	SLC22A25	SLC22A25	solute carrier family 22, member 25	4.84705e-13	5.08746e-09	1.0685
GO:0006810	transport	SLC2A7	SLC2A7	solute carrier family 2 (facilitated glucose transporter), member 7	4.84705e-13	5.08746e-09	1.0685
GO:0006810	transport	POM121C	POM121C	POM121 transmembrane nucleoporin C	4.84705e-13	5.08746e-09	1.0685
GO:0006810	transport	SLC35B4	SLC35B4	solute carrier family 35 (UDP-xylose/UDP-N-acetylglucosamine transporter), member B4	4.84705e-13	5.08746e-09	1.0685
GO:0006810	transport	AAGAB	AAGAB	alpha- and gamma-adaptin binding protein	4.84705e-13	5.08746e-09	1.0685
GO:0006810	transport	TRPC1	TRPC1	transient receptor potential cation channel, subfamily C, member 1	4.84705e-13	5.08746e-09	1.0685
GO:0006810	transport	AL355987.4	MAMDC4	MAM domain containing 4	4.84705e-13	5.08746e-09	1.0685
GO:0006810	transport	SEC14L5	SEC14L5	SEC14-like 5 (S. cerevisiae)	4.84705e-13	5.08746e-09	1.0685
GO:0006810	transport	ATP2B3	ATP2B3	ATPase, Ca++ transporting, plasma membrane 3	4.84705e-13	5.08746e-09	1.0685
GO:0006810	transport	VPS37D	VPS37D	vacuolar protein sorting 37 homolog D (S. cerevisiae)	4.84705e-13	5.08746e-09	1.0685
GO:0006810	transport	SLC22A24	SLC22A24	solute carrier family 22, member 24	4.84705e-13	5.08746e-09	1.0685
GO:0006810	transport	ATP6V1G1	ATP6V1G1	ATPase, H+ transporting, lysosomal 13kDa, V1 subunit G1	4.84705e-13	5.08746e-09	1.0685
GO:0006810	transport	SEC23B	SEC23B	Sec23 homolog B (S. cerevisiae)	4.84705e-13	5.08746e-09	1.0685
GO:0006810	transport	AC099794.1	ATG4C	autophagy related 4C, cysteine peptidase	4.84705e-13	5.08746e-09	1.0685
GO:0006810	transport	PANX1	PANX1	pannexin 1	4.84705e-13	5.08746e-09	1.0685
GO:0006810	transport	ATP6V1E2	ATP6V1E2	ATPase, H+ transporting, lysosomal 31kDa, V1 subunit E2	4.84705e-13	5.08746e-09	1.0685
GO:0006810	transport	SLC13A2	SLC13A2	solute carrier family 13 (sodium-dependent dicarboxylate transporter), member 2	4.84705e-13	5.08746e-09	1.0685
GO:0006810	transport	SLC6A11	SLC6A11	solute carrier family 6 (neurotransmitter transporter), member 11	4.84705e-13	5.08746e-09	1.0685
GO:0006810	transport	SLC18B1	SLC18B1	solute carrier family 18, subfamily B, member 1	4.84705e-13	5.08746e-09	1.0685
GO:0006810	transport	CHRNA5	CHRNA5	cholinergic receptor, nicotinic, alpha 5 (neuronal)	4.84705e-13	5.08746e-09	1.0685
GO:0006810	transport	DIRC2	DIRC2	disrupted in renal carcinoma 2	4.84705e-13	5.08746e-09	1.0685
GO:0006810	transport	MICALL1	MICALL1	MICAL-like 1	4.84705e-13	5.08746e-09	1.0685
GO:0006810	transport	MTM1	MTM1	myotubularin 1	4.84705e-13	5.08746e-09	1.0685
GO:0006810	transport	SLC10A7	SLC10A7	solute carrier family 10, member 7	4.84705e-13	5.08746e-09	1.0685
GO:0006810	transport	AP3S1	AP3S1	adaptor-related protein complex 3, sigma 1 subunit	4.84705e-13	5.08746e-09	1.0685
GO:0006810	transport	ARL3	ARL3	ADP-ribosylation factor-like 3	4.84705e-13	5.08746e-09	1.0685
GO:0006810	transport	P2RX2	P2RX2	purinergic receptor P2X, ligand-gated ion channel, 2	4.84705e-13	5.08746e-09	1.0685
GO:0006810	transport	SLC3A1	SLC3A1	solute carrier family 3 (amino acid transporter heavy chain), member 1	4.84705e-13	5.08746e-09	1.0685
GO:0006810	transport	RAB7A	RAB7A	RAB7A, member RAS oncogene family	4.84705e-13	5.08746e-09	1.0685
GO:0006810	transport	AP000977.1	SORL1	sortilin-related receptor, L(DLR class) A repeats containing	4.84705e-13	5.08746e-09	1.0685
GO:0006810	transport	KCNG2	KCNG2	potassium voltage-gated channel, subfamily G, member 2	4.84705e-13	5.08746e-09	1.0685
GO:0006810	transport	CALHM3	CALHM3	calcium homeostasis modulator 3	4.84705e-13	5.08746e-09	1.0685
GO:0006810	transport	APOM	APOM	apolipoprotein M	4.84705e-13	5.08746e-09	1.0685
GO:0006810	transport	ORM2	ORM2	orosomucoid 2	4.84705e-13	5.08746e-09	1.0685
GO:0006810	transport	AP1M1	AP1M1	adaptor-related protein complex 1, mu 1 subunit	4.84705e-13	5.08746e-09	1.0685
GO:0006810	transport	AL109659.3	SLC5A9	solute carrier family 5 (sodium/sugar cotransporter), member 9	4.84705e-13	5.08746e-09	1.0685
GO:0006810	transport	SLC38A9	SLC38A9	solute carrier family 38, member 9	4.84705e-13	5.08746e-09	1.0685
GO:0006810	transport	TMEM37	TMEM37	transmembrane protein 37	4.84705e-13	5.08746e-09	1.0685
GO:0006810	transport	VPS37C	VPS37C	vacuolar protein sorting 37 homolog C (S. cerevisiae)	4.84705e-13	5.08746e-09	1.0685
GO:0006810	transport	VDAC3	VDAC3	voltage-dependent anion channel 3	4.84705e-13	5.08746e-09	1.0685
GO:0006810	transport	AC009248.2	ANO6	anoctamin 6	4.84705e-13	5.08746e-09	1.0685
GO:0006810	transport	PQLC2	PQLC2	PQ loop repeat containing 2	4.84705e-13	5.08746e-09	1.0685
GO:0006810	transport	AC110921.1	PITPNC1	phosphatidylinositol transfer protein, cytoplasmic 1	4.84705e-13	5.08746e-09	1.0685
GO:0006810	transport	RAB11A	RAB11A	RAB11A, member RAS oncogene family	4.84705e-13	5.08746e-09	1.0685
GO:0006810	transport	NIPA1	NIPA1	non imprinted in Prader-Willi/Angelman syndrome 1	4.84705e-13	5.08746e-09	1.0685
GO:0006810	transport	ASIC1	ASIC1	acid-sensing (proton-gated) ion channel 1	4.84705e-13	5.08746e-09	1.0685
GO:0006810	transport	ATG3	ATG3	autophagy related 3	4.84705e-13	5.08746e-09	1.0685
GO:0006810	transport	VPS16	VPS16	vacuolar protein sorting 16 homolog (S. cerevisiae)	4.84705e-13	5.08746e-09	1.0685
GO:0006810	transport	VPS4A	VPS4A	vacuolar protein sorting 4 homolog A (S. cerevisiae)	4.84705e-13	5.08746e-09	1.0685
GO:0006810	transport	UBE2O	UBE2O	ubiquitin-conjugating enzyme E2O	4.84705e-13	5.08746e-09	1.0685
GO:0006810	transport	KIF17	KIF17	kinesin family member 17	4.84705e-13	5.08746e-09	1.0685
GO:0006810	transport	SLC25A1	SLC25A1	solute carrier family 25 (mitochondrial carrier; citrate transporter), member 1	4.84705e-13	5.08746e-09	1.0685
GO:0006810	transport	SCN11A	SCN11A	sodium channel, voltage-gated, type XI, alpha subunit	4.84705e-13	5.08746e-09	1.0685
GO:0006810	transport	GABRP	GABRP	gamma-aminobutyric acid (GABA) A receptor, pi	4.84705e-13	5.08746e-09	1.0685
GO:0006810	transport	KIF20A	KIF20A	kinesin family member 20A	4.84705e-13	5.08746e-09	1.0685
GO:0006810	transport	AC005674.2	SLC2A9	solute carrier family 2 (facilitated glucose transporter), member 9	4.84705e-13	5.08746e-09	1.0685
GO:0006810	transport	CLCN3	CLCN3	chloride channel, voltage-sensitive 3	4.84705e-13	5.08746e-09	1.0685
GO:0006810	transport	CPNE7	CPNE7	copine VII	4.84705e-13	5.08746e-09	1.0685
GO:0006810	transport	VPS4B	VPS4B	vacuolar protein sorting 4 homolog B (S. cerevisiae)	4.84705e-13	5.08746e-09	1.0685
GO:0006810	transport	AC009902.1	FABP5	fatty acid binding protein 5 (psoriasis-associated)	4.84705e-13	5.08746e-09	1.0685
GO:0006810	transport	AL445183.1	SLC1A7	solute carrier family 1 (glutamate transporter), member 7	4.84705e-13	5.08746e-09	1.0685
GO:0006810	transport	AC010809.3	RYR3	ryanodine receptor 3	4.84705e-13	5.08746e-09	1.0685
GO:0006810	transport	KPNA3	KPNA3	karyopherin alpha 3 (importin alpha 4)	4.84705e-13	5.08746e-09	1.0685
GO:0006810	transport	AL365258.1	DENND1B	DENN/MADD domain containing 1B	4.84705e-13	5.08746e-09	1.0685
GO:0006810	transport	AP000769.2	SCYL1	SCY1-like 1 (S. cerevisiae)	4.84705e-13	5.08746e-09	1.0685
GO:0006810	transport	AP000920.1	KCNJ5	potassium inwardly-rectifying channel, subfamily J, member 5	4.84705e-13	5.08746e-09	1.0685
GO:0006810	transport	MCOLN1	MCOLN1	mucolipin 1	4.84705e-13	5.08746e-09	1.0685
GO:0006810	transport	PEX5	PEX5	peroxisomal biogenesis factor 5	4.84705e-13	5.08746e-09	1.0685
GO:0006810	transport	GRIK5	GRIK5	glutamate receptor, ionotropic, kainate 5	4.84705e-13	5.08746e-09	1.0685
GO:0006810	transport	AC027312.1	KCNIP1	Kv channel interacting protein 1	4.84705e-13	5.08746e-09	1.0685
GO:0006810	transport	POM121	POM121	POM121 transmembrane nucleoporin	4.84705e-13	5.08746e-09	1.0685
GO:0006810	transport	SLC14A1	SLC14A1	solute carrier family 14 (urea transporter), member 1 (Kidd blood group)	4.84705e-13	5.08746e-09	1.0685
GO:0006810	transport	TRAM1L1	TRAM1L1	translocation associated membrane protein 1-like 1	4.84705e-13	5.08746e-09	1.0685
GO:0006810	transport	SRI	SRI	sorcin	4.84705e-13	5.08746e-09	1.0685
GO:0006810	transport	CPT1A	CPT1A	carnitine palmitoyltransferase 1A (liver)	4.84705e-13	5.08746e-09	1.0685
GO:0006810	transport	AL136087.1	KCNK16	potassium channel, subfamily K, member 16	4.84705e-13	5.08746e-09	1.0685
GO:0006810	transport	AC010503.1	SLC25A23	solute carrier family 25 (mitochondrial carrier; phosphate carrier), member 23	4.84705e-13	5.08746e-09	1.0685
GO:0006810	transport	AC025181.1	GOLPH3	golgi phosphoprotein 3 (coat-protein)	4.84705e-13	5.08746e-09	1.0685
GO:0006810	transport	SLC37A1	SLC37A1	solute carrier family 37 (glucose-6-phosphate transporter), member 1	4.84705e-13	5.08746e-09	1.0685
GO:0006810	transport	SNX33	SNX33	sorting nexin 33	4.84705e-13	5.08746e-09	1.0685
GO:0006810	transport	AL645733.1	SLC22A2	solute carrier family 22 (organic cation transporter), member 2	4.84705e-13	5.08746e-09	1.0685
GO:0006810	transport	AC094019.1	OSBPL10	oxysterol binding protein-like 10	4.84705e-13	5.08746e-09	1.0685
GO:0006810	transport	GABRA2	GABRA2	gamma-aminobutyric acid (GABA) A receptor, alpha 2	4.84705e-13	5.08746e-09	1.0685
GO:0006810	transport	LRRC55	LRRC55	leucine rich repeat containing 55	4.84705e-13	5.08746e-09	1.0685
GO:0006810	transport	AC016727.1	XPO1	exportin 1	4.84705e-13	5.08746e-09	1.0685
GO:0006810	transport	AP3B2	AP3B2	adaptor-related protein complex 3, beta 2 subunit	4.84705e-13	5.08746e-09	1.0685
GO:0006810	transport	AC107068.2	CNGA1	cyclic nucleotide gated channel alpha 1	4.84705e-13	5.08746e-09	1.0685
GO:0006810	transport	SNX11	SNX11	sorting nexin 11	4.84705e-13	5.08746e-09	1.0685
GO:0006810	transport	TIMM23B	TIMM23B	translocase of inner mitochondrial membrane 23 homolog B (yeast)	4.84705e-13	5.08746e-09	1.0685
GO:0006810	transport	TMC2	TMC2	transmembrane channel-like 2	4.84705e-13	5.08746e-09	1.0685
GO:0006810	transport	AC091980.1	RANBP17	RAN binding protein 17	4.84705e-13	5.08746e-09	1.0685
GO:0006810	transport	RPH3A	RPH3A	rabphilin 3A	4.84705e-13	5.08746e-09	1.0685
GO:0006810	transport	TRAM2	TRAM2	translocation associated membrane protein 2	4.84705e-13	5.08746e-09	1.0685
GO:0006810	transport	RAB5B	RAB5B	RAB5B, member RAS oncogene family	4.84705e-13	5.08746e-09	1.0685
GO:0006810	transport	AC093899.2	BBS5	Bardet-Biedl syndrome 5	4.84705e-13	5.08746e-09	1.0685
GO:0006810	transport	SLCO1B1	SLCO1B1	solute carrier organic anion transporter family, member 1B1	4.84705e-13	5.08746e-09	1.0685
GO:0006810	transport	SEC61A2	SEC61A2	Sec61 alpha 2 subunit (S. cerevisiae)	4.84705e-13	5.08746e-09	1.0685
GO:0006810	transport	DYNC1LI2	DYNC1LI2	dynein, cytoplasmic 1, light intermediate chain 2	4.84705e-13	5.08746e-09	1.0685
GO:0006810	transport	ZC3H11A	ZC3H11A	zinc finger CCCH-type containing 11A	4.84705e-13	5.08746e-09	1.0685
GO:0006810	transport	AL121990.1	ABCB10	ATP-binding cassette, sub-family B (MDR/TAP), member 10	4.84705e-13	5.08746e-09	1.0685
GO:0006810	transport	CNNM1	CNNM1	cyclin and CBS domain divalent metal cation transport mediator 1	4.84705e-13	5.08746e-09	1.0685
GO:0006810	transport	TPR	TPR	translocated promoter region, nuclear basket protein	4.84705e-13	5.08746e-09	1.0685
GO:0006810	transport	SNX32	SNX32	sorting nexin 32	4.84705e-13	5.08746e-09	1.0685
GO:0006810	transport	SLC39A13	SLC39A13	solute carrier family 39 (zinc transporter), member 13	4.84705e-13	5.08746e-09	1.0685
GO:0006810	transport	MFSD8	MFSD8	major facilitator superfamily domain containing 8	4.84705e-13	5.08746e-09	1.0685
GO:0006810	transport	LBP	LBP	lipopolysaccharide binding protein	4.84705e-13	5.08746e-09	1.0685
GO:0006810	transport	NUP62	NUP62	nucleoporin 62kDa	4.84705e-13	5.08746e-09	1.0685
GO:0006810	transport	SLC10A4	SLC10A4	solute carrier family 10, member 4	4.84705e-13	5.08746e-09	1.0685
GO:0006810	transport	AC073610.3	ARF3	ADP-ribosylation factor 3	4.84705e-13	5.08746e-09	1.0685
GO:0006810	transport	AC069431.2	ATP11B	ATPase, class VI, type 11B	4.84705e-13	5.08746e-09	1.0685
GO:0006810	transport	AC073487.1	SARNP	SAP domain containing ribonucleoprotein	4.84705e-13	5.08746e-09	1.0685
GO:0006810	transport	AL096701.1	EIF4ENIF1	eukaryotic translation initiation factor 4E nuclear import factor 1	4.84705e-13	5.08746e-09	1.0685
GO:0006810	transport	AC073964.1	AP4E1	adaptor-related protein complex 4, epsilon 1 subunit	4.84705e-13	5.08746e-09	1.0685
GO:0006810	transport	ABCC10	ABCC10	ATP-binding cassette, sub-family C (CFTR/MRP), member 10	4.84705e-13	5.08746e-09	1.0685
GO:0006810	transport	SLC25A46	SLC25A46	solute carrier family 25, member 46	4.84705e-13	5.08746e-09	1.0685
GO:0006810	transport	GJA8	GJA8	gap junction protein, alpha 8, 50kDa	4.84705e-13	5.08746e-09	1.0685
GO:0006810	transport	AC110491.2	ARL6	ADP-ribosylation factor-like 6	4.84705e-13	5.08746e-09	1.0685
GO:0006810	transport	GNAI3	GNAI3	guanine nucleotide binding protein (G protein), alpha inhibiting activity polypeptide 3	4.84705e-13	5.08746e-09	1.0685
GO:0006810	transport	SENP2	SENP2	SUMO1/sentrin/SMT3 specific peptidase 2	4.84705e-13	5.08746e-09	1.0685
GO:0006810	transport	STX11	STX11	syntaxin 11	4.84705e-13	5.08746e-09	1.0685
GO:0006810	transport	TIMM9	TIMM9	translocase of inner mitochondrial membrane 9 homolog (yeast)	4.84705e-13	5.08746e-09	1.0685
GO:0006810	transport	AL590132.1	KCNH1	potassium voltage-gated channel, subfamily H (eag-related), member 1	4.84705e-13	5.08746e-09	1.0685
GO:0006810	transport	P2RX3	P2RX3	purinergic receptor P2X, ligand-gated ion channel, 3	4.84705e-13	5.08746e-09	1.0685
GO:0006810	transport	OSBPL9	OSBPL9	oxysterol binding protein-like 9	4.84705e-13	5.08746e-09	1.0685
GO:0006810	transport	AC004691.2	AQP1	aquaporin 1 (Colton blood group)	4.84705e-13	5.08746e-09	1.0685
GO:0006810	transport	BAG6	BAG6	BCL2-associated athanogene 6	4.84705e-13	5.08746e-09	1.0685
GO:0006810	transport	SLC45A1	SLC45A1	solute carrier family 45, member 1	4.84705e-13	5.08746e-09	1.0685
GO:0006810	transport	AC092597.1	ATP10D	ATPase, class V, type 10D	4.84705e-13	5.08746e-09	1.0685
GO:0006810	transport	SCAMP4	SCAMP4	secretory carrier membrane protein 4	4.84705e-13	5.08746e-09	1.0685
GO:0006810	transport	TOMM5	TOMM5	translocase of outer mitochondrial membrane 5 homolog (yeast)	4.84705e-13	5.08746e-09	1.0685
GO:0006810	transport	AC023355.1	SLC12A1	solute carrier family 12 (sodium/potassium/chloride transporter), member 1	4.84705e-13	5.08746e-09	1.0685
GO:0006810	transport	SFXN3	SFXN3	sideroflexin 3	4.84705e-13	5.08746e-09	1.0685
GO:0006810	transport	CHP1	CHP1	calcineurin-like EF-hand protein 1	4.84705e-13	5.08746e-09	1.0685
GO:0006810	transport	AP5M1	AP5M1	adaptor-related protein complex 5, mu 1 subunit	4.84705e-13	5.08746e-09	1.0685
GO:0006810	transport	MFSD9	MFSD9	major facilitator superfamily domain containing 9	4.84705e-13	5.08746e-09	1.0685
GO:0006810	transport	MTTP	MTTP	microsomal triglyceride transfer protein	4.84705e-13	5.08746e-09	1.0685
GO:0006810	transport	PREB	PREB	prolactin regulatory element binding	4.84705e-13	5.08746e-09	1.0685
GO:0006810	transport	AC006063.1	KCNA1	potassium voltage-gated channel, shaker-related subfamily, member 1 (episodic ataxia with myokymia)	4.84705e-13	5.08746e-09	1.0685
GO:0006810	transport	KCNE2	KCNE2	potassium voltage-gated channel, Isk-related family, member 2	4.84705e-13	5.08746e-09	1.0685
GO:0006810	transport	SLC39A4	SLC39A4	solute carrier family 39 (zinc transporter), member 4	4.84705e-13	5.08746e-09	1.0685
GO:0006810	transport	SLC16A4	SLC16A4	solute carrier family 16, member 4	4.84705e-13	5.08746e-09	1.0685
GO:0006810	transport	AC090625.1	SLC1A2	solute carrier family 1 (glial high affinity glutamate transporter), member 2	4.84705e-13	5.08746e-09	1.0685
GO:0006810	transport	APOL3	APOL3	apolipoprotein L, 3	4.84705e-13	5.08746e-09	1.0685
GO:0006810	transport	GRID1	GRID1	glutamate receptor, ionotropic, delta 1	4.84705e-13	5.08746e-09	1.0685
GO:0006810	transport	GABRR1	GABRR1	gamma-aminobutyric acid (GABA) A receptor, rho 1	4.84705e-13	5.08746e-09	1.0685
GO:0006810	transport	AC024884.2	MIP	major intrinsic protein of lens fiber	4.84705e-13	5.08746e-09	1.0685
GO:0006810	transport	CACHD1	CACHD1	cache domain containing 1	4.84705e-13	5.08746e-09	1.0685
GO:0006810	transport	RYR2	RYR2	ryanodine receptor 2 (cardiac)	4.84705e-13	5.08746e-09	1.0685
GO:0006810	transport	SEC14L1	SEC14L1	SEC14-like 1 (S. cerevisiae)	4.84705e-13	5.08746e-09	1.0685
GO:0006810	transport	MON2	MON2	MON2 homolog (S. cerevisiae)	4.84705e-13	5.08746e-09	1.0685
GO:0006810	transport	AC099782.2	FYCO1	FYVE and coiled-coil domain containing 1	4.84705e-13	5.08746e-09	1.0685
GO:0006810	transport	AC046143.1	LSG1	large 60S subunit nuclear export GTPase 1	4.84705e-13	5.08746e-09	1.0685
GO:0006810	transport	PCTP	PCTP	phosphatidylcholine transfer protein	4.84705e-13	5.08746e-09	1.0685
GO:0006810	transport	SLC46A2	SLC46A2	solute carrier family 46, member 2	4.84705e-13	5.08746e-09	1.0685
GO:0006810	transport	SLC35B2	SLC35B2	solute carrier family 35 (adenosine 3'-phospho 5'-phosphosulfate transporter), member B2	4.84705e-13	5.08746e-09	1.0685
GO:0006810	transport	KCNS1	KCNS1	potassium voltage-gated channel, delayed-rectifier, subfamily S, member 1	4.84705e-13	5.08746e-09	1.0685
GO:0006810	transport	PLLP	PLLP	plasmolipin	4.84705e-13	5.08746e-09	1.0685
GO:0006810	transport	ABCA10	ABCA10	ATP-binding cassette, sub-family A (ABC1), member 10	4.84705e-13	5.08746e-09	1.0685
GO:0006810	transport	SLC28A2	SLC28A2	solute carrier family 28 (concentrative nucleoside transporter), member 2	4.84705e-13	5.08746e-09	1.0685
GO:0006810	transport	ABCB7	ABCB7	ATP-binding cassette, sub-family B (MDR/TAP), member 7	4.84705e-13	5.08746e-09	1.0685
GO:0006810	transport	MPPE1	MPPE1	metallophosphoesterase 1	4.84705e-13	5.08746e-09	1.0685
GO:0006810	transport	KIF5C	KIF5C	kinesin family member 5C	4.84705e-13	5.08746e-09	1.0685
GO:0006810	transport	HAP1	HAP1	huntingtin-associated protein 1	4.84705e-13	5.08746e-09	1.0685
GO:0006810	transport	NUP153	NUP153	nucleoporin 153kDa	4.84705e-13	5.08746e-09	1.0685
GO:0006810	transport	RANGRF	RANGRF	RAN guanine nucleotide release factor	4.84705e-13	5.08746e-09	1.0685
GO:0006810	transport	SLC6A3	SLC6A3	solute carrier family 6 (neurotransmitter transporter), member 3	4.84705e-13	5.08746e-09	1.0685
GO:0006810	transport	SLC15A5	SLC15A5	solute carrier family 15, member 5	4.84705e-13	5.08746e-09	1.0685
GO:0006810	transport	STX6	STX6	syntaxin 6	4.84705e-13	5.08746e-09	1.0685
GO:0006810	transport	ATP6AP1	ATP6AP1	ATPase, H+ transporting, lysosomal accessory protein 1	4.84705e-13	5.08746e-09	1.0685
GO:0006810	transport	FXN	FXN	frataxin	4.84705e-13	5.08746e-09	1.0685
GO:0006810	transport	GABARAPL2	GABARAPL2	GABA(A) receptor-associated protein-like 2	4.84705e-13	5.08746e-09	1.0685
GO:0006810	transport	SLC27A6	SLC27A6	solute carrier family 27 (fatty acid transporter), member 6	4.84705e-13	5.08746e-09	1.0685
GO:0006810	transport	BBS1	BBS1	Bardet-Biedl syndrome 1	4.84705e-13	5.08746e-09	1.0685
GO:0006810	transport	IGF2BP3	IGF2BP3	insulin-like growth factor 2 mRNA binding protein 3	4.84705e-13	5.08746e-09	1.0685
GO:0006810	transport	MAGT1	MAGT1	magnesium transporter 1	4.84705e-13	5.08746e-09	1.0685
GO:0006810	transport	AC084754.1	CCDC91	coiled-coil domain containing 91	4.84705e-13	5.08746e-09	1.0685
GO:0006810	transport	AC009955.2	ASIC4	acid-sensing (proton-gated) ion channel family member 4	4.84705e-13	5.08746e-09	1.0685
GO:0006810	transport	RAB1A	RAB1A	RAB1A, member RAS oncogene family	4.84705e-13	5.08746e-09	1.0685
GO:0006810	transport	SNX13	SNX13	sorting nexin 13	4.84705e-13	5.08746e-09	1.0685
GO:0006810	transport	KCNJ4	KCNJ4	potassium inwardly-rectifying channel, subfamily J, member 4	4.84705e-13	5.08746e-09	1.0685
GO:0006810	transport	SLC39A6	SLC39A6	solute carrier family 39 (zinc transporter), member 6	4.84705e-13	5.08746e-09	1.0685
GO:0006810	transport	RANBP3	RANBP3	RAN binding protein 3	4.84705e-13	5.08746e-09	1.0685
GO:0006810	transport	M6PR	M6PR	mannose-6-phosphate receptor (cation dependent)	4.84705e-13	5.08746e-09	1.0685
GO:0006810	transport	SNUPN	SNUPN	snurportin 1	4.84705e-13	5.08746e-09	1.0685
GO:0006810	transport	SYT1	SYT1	synaptotagmin I	4.84705e-13	5.08746e-09	1.0685
GO:0006810	transport	AC076966.1	KCNMB3	potassium large conductance calcium-activated channel, subfamily M beta member 3	4.84705e-13	5.08746e-09	1.0685
GO:0006810	transport	SLC26A7	SLC26A7	solute carrier family 26 (anion exchanger), member 7	4.84705e-13	5.08746e-09	1.0685
GO:0006810	transport	YIPF5	YIPF5	Yip1 domain family, member 5	4.84705e-13	5.08746e-09	1.0685
GO:0006810	transport	AC012676.5	CORO7	coronin 7	4.84705e-13	5.08746e-09	1.0685
GO:0006810	transport	NUP35	NUP35	nucleoporin 35kDa	4.84705e-13	5.08746e-09	1.0685
GO:0006810	transport	AP1G2	AP1G2	adaptor-related protein complex 1, gamma 2 subunit	4.84705e-13	5.08746e-09	1.0685
GO:0006810	transport	AC005833.2	KCNA6	potassium voltage-gated channel, shaker-related subfamily, member 6	4.84705e-13	5.08746e-09	1.0685
GO:0006810	transport	TRAPPC6B	TRAPPC6B	trafficking protein particle complex 6B	4.84705e-13	5.08746e-09	1.0685
GO:0006810	transport	SLC41A1	SLC41A1	solute carrier family 41 (magnesium transporter), member 1	4.84705e-13	5.08746e-09	1.0685
GO:0006810	transport	SCN8A	SCN8A	sodium channel, voltage gated, type VIII, alpha subunit	4.84705e-13	5.08746e-09	1.0685
GO:0006810	transport	SLC27A1	SLC27A1	solute carrier family 27 (fatty acid transporter), member 1	4.84705e-13	5.08746e-09	1.0685
GO:0006810	transport	SLC12A2	SLC12A2	solute carrier family 12 (sodium/potassium/chloride transporter), member 2	4.84705e-13	5.08746e-09	1.0685
GO:0006810	transport	AL109628.2	SEC23A	Sec23 homolog A (S. cerevisiae)	4.84705e-13	5.08746e-09	1.0685
GO:0006810	transport	RAB26	RAB26	RAB26, member RAS oncogene family	4.84705e-13	5.08746e-09	1.0685
GO:0006810	transport	SLC25A42	SLC25A42	solute carrier family 25, member 42	4.84705e-13	5.08746e-09	1.0685
GO:0006810	transport	HFE	HFE	hemochromatosis	4.84705e-13	5.08746e-09	1.0685
GO:0006810	transport	AL121827.1	CHRNA4	cholinergic receptor, nicotinic, alpha 4 (neuronal)	4.84705e-13	5.08746e-09	1.0685
GO:0006810	transport	ATP12A	ATP12A	ATPase, H+/K+ transporting, nongastric, alpha polypeptide	4.84705e-13	5.08746e-09	1.0685
GO:0006810	transport	TMC7	TMC7	transmembrane channel-like 7	4.84705e-13	5.08746e-09	1.0685
GO:0006810	transport	AC018616.1	PMP2	peripheral myelin protein 2	4.84705e-13	5.08746e-09	1.0685
GO:0006810	transport	TSG101	TSG101	tumor susceptibility 101	4.84705e-13	5.08746e-09	1.0685
GO:0006810	transport	RABGEF1	RABGEF1	RAB guanine nucleotide exchange factor (GEF) 1	4.84705e-13	5.08746e-09	1.0685
GO:0006810	transport	AC005921.2	ABCC3	ATP-binding cassette, sub-family C (CFTR/MRP), member 3	4.84705e-13	5.08746e-09	1.0685
GO:0006810	transport	DNAJC15	DNAJC15	DnaJ (Hsp40) homolog, subfamily C, member 15	4.84705e-13	5.08746e-09	1.0685
GO:0006810	transport	KCNK5	KCNK5	potassium channel, subfamily K, member 5	4.84705e-13	5.08746e-09	1.0685
GO:0006810	transport	MFSD10	MFSD10	major facilitator superfamily domain containing 10	4.84705e-13	5.08746e-09	1.0685
GO:0006810	transport	ABRA	ABRA	actin-binding Rho activating protein	4.84705e-13	5.08746e-09	1.0685
GO:0006810	transport	SLC29A1	SLC29A1	solute carrier family 29 (equilibrative nucleoside transporter), member 1	4.84705e-13	5.08746e-09	1.0685
GO:0006810	transport	CACNA1A	CACNA1A	calcium channel, voltage-dependent, P/Q type, alpha 1A subunit	4.84705e-13	5.08746e-09	1.0685
GO:0006810	transport	CP	CP	ceruloplasmin (ferroxidase)	4.84705e-13	5.08746e-09	1.0685
GO:0006810	transport	CLCN4	CLCN4	chloride channel, voltage-sensitive 4	4.84705e-13	5.08746e-09	1.0685
GO:0006810	transport	SLC7A4	SLC7A4	solute carrier family 7, member 4	4.84705e-13	5.08746e-09	1.0685
GO:0006810	transport	SCNN1D	SCNN1D	sodium channel, non-voltage-gated 1, delta subunit	4.84705e-13	5.08746e-09	1.0685
GO:0006810	transport	CACNG2	CACNG2	calcium channel, voltage-dependent, gamma subunit 2	4.84705e-13	5.08746e-09	1.0685
GO:0006810	transport	AC093895.1	DSPP	dentin sialophosphoprotein	4.84705e-13	5.08746e-09	1.0685
GO:0006810	transport	SYT11	SYT11	synaptotagmin XI	4.84705e-13	5.08746e-09	1.0685
GO:0006810	transport	GRIK4	GRIK4	glutamate receptor, ionotropic, kainate 4	4.84705e-13	5.08746e-09	1.0685
GO:0006810	transport	XBP1	XBP1	X-box binding protein 1	4.84705e-13	5.08746e-09	1.0685
GO:0006810	transport	AC106047.2	STIM2	stromal interaction molecule 2	4.84705e-13	5.08746e-09	1.0685
GO:0006810	transport	SLC47A2	SLC47A2	solute carrier family 47 (multidrug and toxin extrusion), member 2	4.84705e-13	5.08746e-09	1.0685
GO:0006810	transport	MCM3AP	MCM3AP	minichromosome maintenance complex component 3 associated protein	4.84705e-13	5.08746e-09	1.0685
GO:0006810	transport	AC026362.2	ABCB9	ATP-binding cassette, sub-family B (MDR/TAP), member 9	4.84705e-13	5.08746e-09	1.0685
GO:0006810	transport	SLC25A43	SLC25A43	solute carrier family 25, member 43	4.84705e-13	5.08746e-09	1.0685
GO:0006810	transport	SCN2A	SCN2A	sodium channel, voltage-gated, type II, alpha subunit	4.84705e-13	5.08746e-09	1.0685
GO:0006810	transport	SLC26A1	SLC26A1	solute carrier family 26 (anion exchanger), member 1	4.84705e-13	5.08746e-09	1.0685
GO:0006810	transport	L29074.1	FMR1	fragile X mental retardation 1	4.84705e-13	5.08746e-09	1.0685
GO:0006810	transport	KCNN3	KCNN3	potassium intermediate/small conductance calcium-activated channel, subfamily N, member 3	4.84705e-13	5.08746e-09	1.0685
GO:0006810	transport	AP4M1	AP4M1	adaptor-related protein complex 4, mu 1 subunit	4.84705e-13	5.08746e-09	1.0685
GO:0006810	transport	SLC14A2	SLC14A2	solute carrier family 14 (urea transporter), member 2	4.84705e-13	5.08746e-09	1.0685
GO:0006810	transport	SLC25A48	SLC25A48	solute carrier family 25, member 48	4.84705e-13	5.08746e-09	1.0685
GO:0006810	transport	AC012615.5	ATP8B3	ATPase, aminophospholipid transporter, class I, type 8B, member 3	4.84705e-13	5.08746e-09	1.0685
GO:0006810	transport	SLC2A5	SLC2A5	solute carrier family 2 (facilitated glucose/fructose transporter), member 5	4.84705e-13	5.08746e-09	1.0685
GO:0006810	transport	AC108688.1	SLC12A8	solute carrier family 12, member 8	4.84705e-13	5.08746e-09	1.0685
GO:0006810	transport	HIKESHI	C11orf73	chromosome 11 open reading frame 73	4.84705e-13	5.08746e-09	1.0685
GO:0006810	transport	SLC22A4	SLC22A4	solute carrier family 22 (organic cation/zwitterion transporter), member 4	4.84705e-13	5.08746e-09	1.0685
GO:0006810	transport	AC113174.1	AHCTF1	AT hook containing transcription factor 1	4.84705e-13	5.08746e-09	1.0685
GO:0006810	transport	AC018639.1	TNPO3	transportin 3	4.84705e-13	5.08746e-09	1.0685
GO:0006810	transport	EXOC7	EXOC7	exocyst complex component 7	4.84705e-13	5.08746e-09	1.0685
GO:0006810	transport	AC106820.2	ABCA3	ATP-binding cassette, sub-family A (ABC1), member 3	4.84705e-13	5.08746e-09	1.0685
GO:0006810	transport	CHRNE	CHRNE	cholinergic receptor, nicotinic, epsilon (muscle)	4.84705e-13	5.08746e-09	1.0685
GO:0006810	transport	MFSD5	MFSD5	major facilitator superfamily domain containing 5	4.84705e-13	5.08746e-09	1.0685
GO:0006810	transport	AC108157.1	AFM	afamin	4.84705e-13	5.08746e-09	1.0685
GO:0006810	transport	RAMP1	RAMP1	receptor (G protein-coupled) activity modifying protein 1	4.84705e-13	5.08746e-09	1.0685
GO:0006810	transport	MTCH2	MTCH2	mitochondrial carrier 2	4.84705e-13	5.08746e-09	1.0685
GO:0006810	transport	AC025574.1	APOF	apolipoprotein F	4.84705e-13	5.08746e-09	1.0685
GO:0006810	transport	RAB22A	RAB22A	RAB22A, member RAS oncogene family	4.84705e-13	5.08746e-09	1.0685
GO:0006810	transport	STARD10	STARD10	StAR-related lipid transfer (START) domain containing 10	4.84705e-13	5.08746e-09	1.0685
GO:0006810	transport	P2RX4	P2RX4	purinergic receptor P2X, ligand-gated ion channel, 4	4.84705e-13	5.08746e-09	1.0685
GO:0006810	transport	SLC9A8	SLC9A8	solute carrier family 9, subfamily A (NHE8, cation proton antiporter 8), member 8	4.84705e-13	5.08746e-09	1.0685
GO:0006810	transport	SEC14L3	SEC14L3	SEC14-like 3 (S. cerevisiae)	4.84705e-13	5.08746e-09	1.0685
GO:0006810	transport	STXBP1	STXBP1	syntaxin binding protein 1	4.84705e-13	5.08746e-09	1.0685
GO:0006810	transport	ATP6V1B1	ATP6V1B1	ATPase, H+ transporting, lysosomal 56/58kDa, V1 subunit B1	4.84705e-13	5.08746e-09	1.0685
GO:0006810	transport	COG8	COG8	component of oligomeric golgi complex 8	4.84705e-13	5.08746e-09	1.0685
GO:0006810	transport	LRRC8E	LRRC8E	leucine rich repeat containing 8 family, member E	4.84705e-13	5.08746e-09	1.0685
GO:0006810	transport	CRABP1	CRABP1	cellular retinoic acid binding protein 1	4.84705e-13	5.08746e-09	1.0685
GO:0006810	transport	SYT6	SYT6	synaptotagmin VI	4.84705e-13	5.08746e-09	1.0685
GO:0006810	transport	ABCC11	ABCC11	ATP-binding cassette, sub-family C (CFTR/MRP), member 11	4.84705e-13	5.08746e-09	1.0685
GO:0006810	transport	PKD2	PKD2	polycystic kidney disease 2 (autosomal dominant)	4.84705e-13	5.08746e-09	1.0685
GO:0006810	transport	ORM1	ORM1	orosomucoid 1	4.84705e-13	5.08746e-09	1.0685
GO:0006810	transport	AL137058.2	HNRNPA1L2	heterogeneous nuclear ribonucleoprotein A1-like 2	4.84705e-13	5.08746e-09	1.0685
GO:0006810	transport	AC078778.1	COPZ1	coatomer protein complex, subunit zeta 1	4.84705e-13	5.08746e-09	1.0685
GO:0006810	transport	SLC17A6	SLC17A6	solute carrier family 17 (vesicular glutamate transporter), member 6	4.84705e-13	5.08746e-09	1.0685
GO:0006810	transport	SLC1A1	SLC1A1	solute carrier family 1 (neuronal/epithelial high affinity glutamate transporter, system Xag), member 1	4.84705e-13	5.08746e-09	1.0685
GO:0006810	transport	AP2S1	AP2S1	adaptor-related protein complex 2, sigma 1 subunit	4.84705e-13	5.08746e-09	1.0685
GO:0006810	transport	XPOT	XPOT	exportin, tRNA	4.84705e-13	5.08746e-09	1.0685
GO:0006810	transport	AP000845.1	THOC1	THO complex 1	4.84705e-13	5.08746e-09	1.0685
GO:0006810	transport	EIF4A3	EIF4A3	eukaryotic translation initiation factor 4A3	4.84705e-13	5.08746e-09	1.0685
GO:0006810	transport	AC007536.1	SLC2A14	solute carrier family 2 (facilitated glucose transporter), member 14	4.84705e-13	5.08746e-09	1.0685
GO:0006810	transport	SLC16A5	SLC16A5	solute carrier family 16 (monocarboxylate transporter), member 5	4.84705e-13	5.08746e-09	1.0685
GO:0006810	transport	AC110800.1	GRID2	glutamate receptor, ionotropic, delta 2	4.84705e-13	5.08746e-09	1.0685
GO:0006810	transport	FO393414.1	KCNQ5	potassium voltage-gated channel, KQT-like subfamily, member 5	4.84705e-13	5.08746e-09	1.0685
GO:0006810	transport	GC	GC	group-specific component (vitamin D binding protein)	4.84705e-13	5.08746e-09	1.0685
GO:0006810	transport	LRRC8B	LRRC8B	leucine rich repeat containing 8 family, member B	4.84705e-13	5.08746e-09	1.0685
GO:0006810	transport	SLC30A9	SLC30A9	solute carrier family 30 (zinc transporter), member 9	4.84705e-13	5.08746e-09	1.0685
GO:0006810	transport	AL162258.1	CHTOP	chromatin target of PRMT1	4.84705e-13	5.08746e-09	1.0685
GO:0006810	transport	LMAN1	LMAN1	lectin, mannose-binding, 1	4.84705e-13	5.08746e-09	1.0685
GO:0006810	transport	SLC25A25	SLC25A25	solute carrier family 25 (mitochondrial carrier; phosphate carrier), member 25	4.84705e-13	5.08746e-09	1.0685
GO:0006810	transport	NCBP2	NCBP2	nuclear cap binding protein subunit 2, 20kDa	4.84705e-13	5.08746e-09	1.0685
GO:0006810	transport	TMEM63B	TMEM63B	transmembrane protein 63B	4.84705e-13	5.08746e-09	1.0685
GO:0006810	transport	AC118553.1	SLC35A3	solute carrier family 35 (UDP-N-acetylglucosamine (UDP-GlcNAc) transporter), member A3	4.84705e-13	5.08746e-09	1.0685
GO:0006810	transport	SLC20A2	SLC20A2	solute carrier family 20 (phosphate transporter), member 2	4.84705e-13	5.08746e-09	1.0685
GO:0006810	transport	MPC1	MPC1	mitochondrial pyruvate carrier 1	4.84705e-13	5.08746e-09	1.0685
GO:0006810	transport	CNGA2	CNGA2	cyclic nucleotide gated channel alpha 2	4.84705e-13	5.08746e-09	1.0685
GO:0006810	transport	KCNH2	KCNH2	potassium voltage-gated channel, subfamily H (eag-related), member 2	4.84705e-13	5.08746e-09	1.0685
GO:0006810	transport	SLC7A6OS	SLC7A6OS	solute carrier family 7, member 6 opposite strand	4.84705e-13	5.08746e-09	1.0685
GO:0006810	transport	CHMP6	CHMP6	charged multivesicular body protein 6	4.84705e-13	5.08746e-09	1.0685
GO:0006810	transport	AP003351.1	CDH17	cadherin 17, LI cadherin (liver-intestine)	4.84705e-13	5.08746e-09	1.0685
GO:0006810	transport	MAGEL2	MAGEL2	MAGE-like 2	4.84705e-13	5.08746e-09	1.0685
GO:0006810	transport	IPO4	IPO4	importin 4	4.84705e-13	5.08746e-09	1.0685
GO:0006810	transport	RAB34	RAB34	RAB34, member RAS oncogene family	4.84705e-13	5.08746e-09	1.0685
GO:0006810	transport	SLC38A8	SLC38A8	solute carrier family 38, member 8	4.84705e-13	5.08746e-09	1.0685
GO:0006810	transport	SLC37A4	SLC37A4	solute carrier family 37 (glucose-6-phosphate transporter), member 4	4.84705e-13	5.08746e-09	1.0685
GO:0006810	transport	NUP210	NUP210	nucleoporin 210kDa	4.84705e-13	5.08746e-09	1.0685
GO:0006810	transport	AQP10	AQP10	aquaporin 10	4.84705e-13	5.08746e-09	1.0685
GO:0006810	transport	SNX31	SNX31	sorting nexin 31	4.84705e-13	5.08746e-09	1.0685
GO:0006810	transport	APOC3	APOC3	apolipoprotein C-III	4.84705e-13	5.08746e-09	1.0685
GO:0006810	transport	AC015689.1	STIM1	stromal interaction molecule 1	4.84705e-13	5.08746e-09	1.0685
GO:0006810	transport	AC015727.1	RABEP1	rabaptin, RAB GTPase binding effector protein 1	4.84705e-13	5.08746e-09	1.0685
GO:0006810	transport	IPO7	IPO7	importin 7	4.84705e-13	5.08746e-09	1.0685
GO:0006810	transport	STARD4	STARD4	StAR-related lipid transfer (START) domain containing 4	4.84705e-13	5.08746e-09	1.0685
GO:0006810	transport	SEC13	SEC13	SEC13 homolog (S. cerevisiae)	4.84705e-13	5.08746e-09	1.0685
GO:0006810	transport	KCNS2	KCNS2	potassium voltage-gated channel, delayed-rectifier, subfamily S, member 2	4.84705e-13	5.08746e-09	1.0685
GO:0006810	transport	AL391497.1	LRRC8D	leucine rich repeat containing 8 family, member D	4.84705e-13	5.08746e-09	1.0685
GO:0006810	transport	AC091133.3	IGF2BP1	insulin-like growth factor 2 mRNA binding protein 1	4.84705e-13	5.08746e-09	1.0685
GO:0006810	transport	AL356752.1	ATP11A	ATPase, class VI, type 11A	4.84705e-13	5.08746e-09	1.0685
GO:0006810	transport	SLC25A20	SLC25A20	solute carrier family 25 (carnitine/acylcarnitine translocase), member 20	4.84705e-13	5.08746e-09	1.0685
GO:0006810	transport	LRSAM1	LRSAM1	leucine rich repeat and sterile alpha motif containing 1	4.84705e-13	5.08746e-09	1.0685
GO:0006810	transport	TMC4	TMC4	transmembrane channel-like 4	4.84705e-13	5.08746e-09	1.0685
GO:0006810	transport	KCNC4	KCNC4	potassium voltage-gated channel, Shaw-related subfamily, member 4	4.84705e-13	5.08746e-09	1.0685
GO:0006810	transport	TIMM10	TIMM10	translocase of inner mitochondrial membrane 10 homolog (yeast)	4.84705e-13	5.08746e-09	1.0685
GO:0006810	transport	CHMP4C	CHMP4C	charged multivesicular body protein 4C	4.84705e-13	5.08746e-09	1.0685
GO:0006810	transport	AC073052.1	CUL3	cullin 3	4.84705e-13	5.08746e-09	1.0685
GO:0006810	transport	SLC19A2	SLC19A2	solute carrier family 19 (thiamine transporter), member 2	4.84705e-13	5.08746e-09	1.0685
GO:0006810	transport	AC008074.2	AFTPH	aftiphilin	4.84705e-13	5.08746e-09	1.0685
GO:0006810	transport	KPNA2	KPNA2	karyopherin alpha 2 (RAG cohort 1, importin alpha 1)	4.84705e-13	5.08746e-09	1.0685
GO:0006810	transport	SNX14	SNX14	sorting nexin 14	4.84705e-13	5.08746e-09	1.0685
GO:0006810	transport	AC006942.1	AP2A1	adaptor-related protein complex 2, alpha 1 subunit	4.84705e-13	5.08746e-09	1.0685
GO:0006810	transport	TMEM30B	TMEM30B	transmembrane protein 30B	4.84705e-13	5.08746e-09	1.0685
GO:0006810	transport	KCNA7	KCNA7	potassium voltage-gated channel, shaker-related subfamily, member 7	4.84705e-13	5.08746e-09	1.0685
GO:0006810	transport	LYST	LYST	lysosomal trafficking regulator	4.84705e-13	5.08746e-09	1.0685
GO:0006810	transport	TOMM7	TOMM7	translocase of outer mitochondrial membrane 7 homolog (yeast)	4.84705e-13	5.08746e-09	1.0685
GO:0006810	transport	SLC22A10	SLC22A10	solute carrier family 22, member 10	4.84705e-13	5.08746e-09	1.0685
GO:0006810	transport	STARD6	STARD6	StAR-related lipid transfer (START) domain containing 6	4.84705e-13	5.08746e-09	1.0685
GO:0006810	transport	THOC2	THOC2	THO complex 2	4.84705e-13	5.08746e-09	1.0685
GO:0006810	transport	GRIN2D	GRIN2D	glutamate receptor, ionotropic, N-methyl D-aspartate 2D	4.84705e-13	5.08746e-09	1.0685
GO:0006810	transport	RAB5A	RAB5A	RAB5A, member RAS oncogene family	4.84705e-13	5.08746e-09	1.0685
GO:0006810	transport	AC022165.1	ATP2C2	ATPase, Ca++ transporting, type 2C, member 2	4.84705e-13	5.08746e-09	1.0685
GO:0006810	transport	AC096713.1	SLC4A4	solute carrier family 4 (sodium bicarbonate cotransporter), member 4	4.84705e-13	5.08746e-09	1.0685
GO:0006810	transport	APOL1	APOL1	apolipoprotein L, 1	4.84705e-13	5.08746e-09	1.0685
GO:0006810	transport	AC004672.2	ERC1	ELKS/RAB6-interacting/CAST family member 1	4.84705e-13	5.08746e-09	1.0685
GO:0006810	transport	COPG1	COPG1	coatomer protein complex, subunit gamma 1	4.84705e-13	5.08746e-09	1.0685
GO:0006810	transport	VTI1A	VTI1A	vesicle transport through interaction with t-SNAREs 1A	4.84705e-13	5.08746e-09	1.0685
GO:0006810	transport	SLCO1B7	SLCO1B7	solute carrier organic anion transporter family, member 1B7 (non-functional)	4.84705e-13	5.08746e-09	1.0685
GO:0006810	transport	JAGN1	JAGN1	jagunal homolog 1 (Drosophila)	4.84705e-13	5.08746e-09	1.0685
GO:0006810	transport	SLC35A2	SLC35A2	solute carrier family 35 (UDP-galactose transporter), member A2	4.84705e-13	5.08746e-09	1.0685
GO:0006810	transport	EXOC6B	EXOC6B	exocyst complex component 6B	4.84705e-13	5.08746e-09	1.0685
GO:0006810	transport	MYO5A	MYO5A	myosin VA (heavy chain 12, myoxin)	4.84705e-13	5.08746e-09	1.0685
GO:0006810	transport	RAB2A	RAB2A	RAB2A, member RAS oncogene family	4.84705e-13	5.08746e-09	1.0685
GO:0006810	transport	LCN9	LCN9	lipocalin 9	4.84705e-13	5.08746e-09	1.0685
GO:0006810	transport	SLC10A3	SLC10A3	solute carrier family 10, member 3	4.84705e-13	5.08746e-09	1.0685
GO:0006810	transport	AC091153.2	ARRB2	arrestin, beta 2	4.84705e-13	5.08746e-09	1.0685
GO:0006810	transport	ATP2B2	ATP2B2	ATPase, Ca++ transporting, plasma membrane 2	4.84705e-13	5.08746e-09	1.0685
GO:0006810	transport	AC099795.1	SLC2A1	solute carrier family 2 (facilitated glucose transporter), member 1	4.84705e-13	5.08746e-09	1.0685
GO:0006810	transport	TRPM6	TRPM6	transient receptor potential cation channel, subfamily M, member 6	4.84705e-13	5.08746e-09	1.0685
GO:0006810	transport	AC008897.3	COL4A3BP	collagen, type IV, alpha 3 (Goodpasture antigen) binding protein	4.84705e-13	5.08746e-09	1.0685
GO:0006810	transport	SLC2A10	SLC2A10	solute carrier family 2 (facilitated glucose transporter), member 10	4.84705e-13	5.08746e-09	1.0685
GO:0006810	transport	SLC13A5	SLC13A5	solute carrier family 13 (sodium-dependent citrate transporter), member 5	4.84705e-13	5.08746e-09	1.0685
GO:0006810	transport	STX10	STX10	syntaxin 10	4.84705e-13	5.08746e-09	1.0685
GO:0006810	transport	AC009303.2	CCDC93	coiled-coil domain containing 93	4.84705e-13	5.08746e-09	1.0685
GO:0006810	transport	PLEKHF2	PLEKHF2	pleckstrin homology domain containing, family F (with FYVE domain) member 2	4.84705e-13	5.08746e-09	1.0685
GO:0006810	transport	ABCA9	ABCA9	ATP-binding cassette, sub-family A (ABC1), member 9	4.84705e-13	5.08746e-09	1.0685
GO:0006810	transport	TMC1	TMC1	transmembrane channel-like 1	4.84705e-13	5.08746e-09	1.0685
GO:0006810	transport	UNC119B	UNC119B	unc-119 homolog B (C. elegans)	4.84705e-13	5.08746e-09	1.0685
GO:0006810	transport	TRPM2	TRPM2	transient receptor potential cation channel, subfamily M, member 2	4.84705e-13	5.08746e-09	1.0685
GO:0006810	transport	SLC35F6	SLC35F6	solute carrier family 35, member F6	4.84705e-13	5.08746e-09	1.0685
GO:0006810	transport	AL591424.2	CACNA1B	calcium channel, voltage-dependent, N type, alpha 1B subunit	4.84705e-13	5.08746e-09	1.0685
GO:0006810	transport	AQP2	AQP2	aquaporin 2 (collecting duct)	4.84705e-13	5.08746e-09	1.0685
GO:0006810	transport	OSBPL8	OSBPL8	oxysterol binding protein-like 8	4.84705e-13	5.08746e-09	1.0685
GO:0006810	transport	AFP	AFP	alpha-fetoprotein	4.84705e-13	5.08746e-09	1.0685
GO:0006810	transport	KCNK13	KCNK13	potassium channel, subfamily K, member 13	4.84705e-13	5.08746e-09	1.0685
GO:0006810	transport	AC000061.1	CFTR	cystic fibrosis transmembrane conductance regulator (ATP-binding cassette sub-family C, member 7)	4.84705e-13	5.08746e-09	1.0685
GO:0006810	transport	KLHL20	KLHL20	kelch-like family member 20	4.84705e-13	5.08746e-09	1.0685
GO:0006810	transport	HTR3A	HTR3A	5-hydroxytryptamine (serotonin) receptor 3A, ionotropic	4.84705e-13	5.08746e-09	1.0685
GO:0006810	transport	TCN2	TCN2	transcobalamin II	4.84705e-13	5.08746e-09	1.0685
GO:0006810	transport	CHMP3	CHMP3	charged multivesicular body protein 3	4.84705e-13	5.08746e-09	1.0685
GO:0006810	transport	AC021698.1	ANO3	anoctamin 3	4.84705e-13	5.08746e-09	1.0685
GO:0006810	transport	BLZF1	BLZF1	basic leucine zipper nuclear factor 1	4.84705e-13	5.08746e-09	1.0685
GO:0006810	transport	RIMS4	RIMS4	regulating synaptic membrane exocytosis 4	4.84705e-13	5.08746e-09	1.0685
GO:0006810	transport	AL449363.1	SLC2A12	solute carrier family 2 (facilitated glucose transporter), member 12	4.84705e-13	5.08746e-09	1.0685
GO:0006810	transport	VPS13B	VPS13B	vacuolar protein sorting 13 homolog B (yeast)	4.84705e-13	5.08746e-09	1.0685
GO:0006810	transport	SLC30A10	SLC30A10	solute carrier family 30, member 10	4.84705e-13	5.08746e-09	1.0685
GO:0006810	transport	AC018644.1	TTC26	tetratricopeptide repeat domain 26	4.84705e-13	5.08746e-09	1.0685
GO:0006810	transport	SLC2A2	SLC2A2	solute carrier family 2 (facilitated glucose transporter), member 2	4.84705e-13	5.08746e-09	1.0685
GO:0006810	transport	AC091982.2	G3BP1	GTPase activating protein (SH3 domain) binding protein 1	4.84705e-13	5.08746e-09	1.0685
GO:0006810	transport	AC067969.1	RYR1	ryanodine receptor 1 (skeletal)	4.84705e-13	5.08746e-09	1.0685
GO:0006810	transport	CRABP2	CRABP2	cellular retinoic acid binding protein 2	4.84705e-13	5.08746e-09	1.0685
GO:0006810	transport	AC239860.2	GPR89A	G protein-coupled receptor 89A	4.84705e-13	5.08746e-09	1.0685
GO:0006810	transport	GORASP1	GORASP1	golgi reassembly stacking protein 1, 65kDa	4.84705e-13	5.08746e-09	1.0685
GO:0006810	transport	IPO9	IPO9	importin 9	4.84705e-13	5.08746e-09	1.0685
GO:0006810	transport	DBI	DBI	diazepam binding inhibitor (GABA receptor modulator, acyl-CoA binding protein)	4.84705e-13	5.08746e-09	1.0685
GO:0006810	transport	SLC30A3	SLC30A3	solute carrier family 30 (zinc transporter), member 3	4.84705e-13	5.08746e-09	1.0685
GO:0006810	transport	LMBRD1	LMBRD1	LMBR1 domain containing 1	4.84705e-13	5.08746e-09	1.0685
GO:0006810	transport	DYNLT3	DYNLT3	dynein, light chain, Tctex-type 3	4.84705e-13	5.08746e-09	1.0685
GO:0006810	transport	SFXN5	SFXN5	sideroflexin 5	4.84705e-13	5.08746e-09	1.0685
GO:0006810	transport	VPS52	VPS52	vacuolar protein sorting 52 homolog (S. cerevisiae)	4.84705e-13	5.08746e-09	1.0685
GO:0006810	transport	NUP54	NUP54	nucleoporin 54kDa	4.84705e-13	5.08746e-09	1.0685
GO:0006810	transport	AL591428.1	CLVS2	clavesin 2	4.84705e-13	5.08746e-09	1.0685
GO:0006810	transport	P2RX5	P2RX5	purinergic receptor P2X, ligand-gated ion channel, 5	4.84705e-13	5.08746e-09	1.0685
GO:0006810	transport	NXT2	NXT2	nuclear transport factor 2-like export factor 2	4.84705e-13	5.08746e-09	1.0685
GO:0006810	transport	OBP2A	OBP2A	odorant binding protein 2A	4.84705e-13	5.08746e-09	1.0685
GO:0006810	transport	VPS37B	VPS37B	vacuolar protein sorting 37 homolog B (S. cerevisiae)	4.84705e-13	5.08746e-09	1.0685
GO:0006810	transport	NIPAL1	NIPAL1	NIPA-like domain containing 1	4.84705e-13	5.08746e-09	1.0685
GO:0006810	transport	SLC22A8	SLC22A8	solute carrier family 22 (organic anion transporter), member 8	4.84705e-13	5.08746e-09	1.0685
GO:0006810	transport	AL355990.1	SLC6A17	solute carrier family 6 (neutral amino acid transporter), member 17	4.84705e-13	5.08746e-09	1.0685
GO:0006810	transport	KCNF1	KCNF1	potassium voltage-gated channel, subfamily F, member 1	4.84705e-13	5.08746e-09	1.0685
GO:0006810	transport	AC012186.3	VPS35	vacuolar protein sorting 35 homolog (S. cerevisiae)	4.84705e-13	5.08746e-09	1.0685
GO:0006810	transport	SLC15A2	SLC15A2	solute carrier family 15 (oligopeptide transporter), member 2	4.84705e-13	5.08746e-09	1.0685
GO:0006810	transport	PLIN3	PLIN3	perilipin 3	4.84705e-13	5.08746e-09	1.0685
GO:0006810	transport	KCNV2	KCNV2	potassium channel, subfamily V, member 2	4.84705e-13	5.08746e-09	1.0685
GO:0006810	transport	TCOF1	TCOF1	Treacher Collins-Franceschetti syndrome 1	4.84705e-13	5.08746e-09	1.0685
GO:0006810	transport	LAPTM4B	LAPTM4B	lysosomal protein transmembrane 4 beta	4.84705e-13	5.08746e-09	1.0685
GO:0006810	transport	CHMP1A	CHMP1A	charged multivesicular body protein 1A	4.84705e-13	5.08746e-09	1.0685
GO:0006810	transport	AC108448.1	OSBPL5	oxysterol binding protein-like 5	4.84705e-13	5.08746e-09	1.0685
GO:0006810	transport	KCNB2	KCNB2	potassium voltage-gated channel, Shab-related subfamily, member 2	4.84705e-13	5.08746e-09	1.0685
GO:0006810	transport	LCN1	LCN1	lipocalin 1	4.84705e-13	5.08746e-09	1.0685
GO:0006810	transport	VLDLR	VLDLR	very low density lipoprotein receptor	4.84705e-13	5.08746e-09	1.0685
GO:0006810	transport	AP001160.2	SLC3A2	solute carrier family 3 (amino acid transporter heavy chain), member 2	4.84705e-13	5.08746e-09	1.0685
GO:0006810	transport	AC003002.3	TRAPPC2	trafficking protein particle complex 2	4.84705e-13	5.08746e-09	1.0685
GO:0006810	transport	KCNJ16	KCNJ16	potassium inwardly-rectifying channel, subfamily J, member 16	4.84705e-13	5.08746e-09	1.0685
GO:0006810	transport	SLC16A6	SLC16A6	solute carrier family 16, member 6	4.84705e-13	5.08746e-09	1.0685
GO:0006810	transport	CPLX4	CPLX4	complexin 4	4.84705e-13	5.08746e-09	1.0685
GO:0006810	transport	AL356134.1	SLC28A3	solute carrier family 28 (concentrative nucleoside transporter), member 3	4.84705e-13	5.08746e-09	1.0685
GO:0006810	transport	AC239801.1	GPR89B	G protein-coupled receptor 89B	4.84705e-13	5.08746e-09	1.0685
GO:0006810	transport	CLIC4	CLIC4	chloride intracellular channel 4	4.84705e-13	5.08746e-09	1.0685
GO:0006810	transport	VDAC2	VDAC2	voltage-dependent anion channel 2	4.84705e-13	5.08746e-09	1.0685
GO:0006810	transport	PEX14	PEX14	peroxisomal biogenesis factor 14	4.84705e-13	5.08746e-09	1.0685
GO:0006810	transport	MVP	MVP	major vault protein	4.84705e-13	5.08746e-09	1.0685
GO:0006810	transport	ATP6V1F	ATP6V1F	ATPase, H+ transporting, lysosomal 14kDa, V1 subunit F	4.84705e-13	5.08746e-09	1.0685
GO:0006810	transport	RBP1	RBP1	retinol binding protein 1, cellular	4.84705e-13	5.08746e-09	1.0685
GO:0006810	transport	HSPB11	HSPB11	heat shock protein family B (small), member 11	4.84705e-13	5.08746e-09	1.0685
GO:0006810	transport	AC093496.1	SLC6A6	solute carrier family 6 (neurotransmitter transporter), member 6	4.84705e-13	5.08746e-09	1.0685
GO:0006810	transport	RANBP6	RANBP6	RAN binding protein 6	4.84705e-13	5.08746e-09	1.0685
GO:0006810	transport	KIF13A	KIF13A	kinesin family member 13A	4.84705e-13	5.08746e-09	1.0685
GO:0006810	transport	THOC6	THOC6	THO complex 6 homolog (Drosophila)	4.84705e-13	5.08746e-09	1.0685
GO:0006810	transport	TRPC6	TRPC6	transient receptor potential cation channel, subfamily C, member 6	4.84705e-13	5.08746e-09	1.0685
GO:0006810	transport	SLC6A18	SLC6A18	solute carrier family 6 (neutral amino acid transporter), member 18	4.84705e-13	5.08746e-09	1.0685
GO:0006810	transport	SLC37A3	SLC37A3	solute carrier family 37, member 3	4.84705e-13	5.08746e-09	1.0685
GO:0006810	transport	TRAPPC3	TRAPPC3	trafficking protein particle complex 3	4.84705e-13	5.08746e-09	1.0685
GO:0006810	transport	AP3S2	AP3S2	adaptor-related protein complex 3, sigma 2 subunit	4.84705e-13	5.08746e-09	1.0685
GO:0006810	transport	PDCD6IP	PDCD6IP	programmed cell death 6 interacting protein	4.84705e-13	5.08746e-09	1.0685
GO:0006810	transport	SMAD3	SMAD3	SMAD family member 3	4.84705e-13	5.08746e-09	1.0685
GO:0006810	transport	TCAF1	TCAF1	family with sequence similarity 115, member A	4.84705e-13	5.08746e-09	1.0685
GO:0006810	transport	ABCA4	ABCA4	ATP-binding cassette, sub-family A (ABC1), member 4	4.84705e-13	5.08746e-09	1.0685
GO:0006810	transport	STX18	STX18	syntaxin 18	4.84705e-13	5.08746e-09	1.0685
GO:0006810	transport	GLE1	GLE1	GLE1 RNA export mediator	4.84705e-13	5.08746e-09	1.0685
GO:0006810	transport	NAPB	NAPB	N-ethylmaleimide-sensitive factor attachment protein, beta	4.84705e-13	5.08746e-09	1.0685
GO:0006810	transport	VPS26B	VPS26B	vacuolar protein sorting 26 homolog B (S. pombe)	4.84705e-13	5.08746e-09	1.0685
GO:0006810	transport	TRPM3	TRPM3	transient receptor potential cation channel, subfamily M, member 3	4.84705e-13	5.08746e-09	1.0685
GO:0006810	transport	ASIC5	ASIC5	acid-sensing (proton-gated) ion channel family member 5	4.84705e-13	5.08746e-09	1.0685
GO:0006810	transport	CACNG7	CACNG7	calcium channel, voltage-dependent, gamma subunit 7	4.84705e-13	5.08746e-09	1.0685
GO:0006810	transport	GOPC	GOPC	golgi-associated PDZ and coiled-coil motif containing	4.84705e-13	5.08746e-09	1.0685
GO:0006810	transport	CACNA1S	CACNA1S	calcium channel, voltage-dependent, L type, alpha 1S subunit	4.84705e-13	5.08746e-09	1.0685
GO:0006810	transport	GABARAP	GABARAP	GABA(A) receptor-associated protein	4.84705e-13	5.08746e-09	1.0685
GO:0006810	transport	AP000941.1	ARCN1	archain 1	4.84705e-13	5.08746e-09	1.0685
GO:0006810	transport	IFT27	IFT27	intraflagellar transport 27	4.84705e-13	5.08746e-09	1.0685
GO:0006810	transport	SRSF3	SRSF3	serine/arginine-rich splicing factor 3	4.84705e-13	5.08746e-09	1.0685
GO:0006810	transport	SYNRG	SYNRG	synergin, gamma	4.84705e-13	5.08746e-09	1.0685
GO:0006810	transport	SLC6A20	SLC6A20	solute carrier family 6 (proline IMINO transporter), member 20	4.84705e-13	5.08746e-09	1.0685
GO:0006810	transport	TMED4	TMED4	transmembrane emp24 protein transport domain containing 4	4.84705e-13	5.08746e-09	1.0685
GO:0006810	transport	P2RX6	P2RX6	purinergic receptor P2X, ligand-gated ion channel, 6	4.84705e-13	5.08746e-09	1.0685
GO:0006810	transport	ATOX1	ATOX1	antioxidant 1 copper chaperone	4.84705e-13	5.08746e-09	1.0685
GO:0006810	transport	MTX1	MTX1	metaxin 1	4.84705e-13	5.08746e-09	1.0685
GO:0006810	transport	SAR1B	SAR1B	secretion associated, Ras related GTPase 1B	4.84705e-13	5.08746e-09	1.0685
GO:0006810	transport	SYPL2	SYPL2	synaptophysin-like 2	4.84705e-13	5.08746e-09	1.0685
GO:0006810	transport	TTC8	TTC8	tetratricopeptide repeat domain 8	4.84705e-13	5.08746e-09	1.0685
GO:0006810	transport	MAGOHB	MAGOHB	mago-nashi homolog B (Drosophila)	4.84705e-13	5.08746e-09	1.0685
GO:0006810	transport	GABRA1	GABRA1	gamma-aminobutyric acid (GABA) A receptor, alpha 1	4.84705e-13	5.08746e-09	1.0685
GO:0006810	transport	AC025627.1	SLC47A1	solute carrier family 47 (multidrug and toxin extrusion), member 1	4.84705e-13	5.08746e-09	1.0685
GO:0006810	transport	NUP58	NUP58	nucleoporin like 1	4.84705e-13	5.08746e-09	1.0685
GO:0006810	transport	SLC29A3	SLC29A3	solute carrier family 29 (equilibrative nucleoside transporter), member 3	4.84705e-13	5.08746e-09	1.0685
GO:0006810	transport	XPO4	XPO4	exportin 4	4.84705e-13	5.08746e-09	1.0685
GO:0006810	transport	AC003101.3	RAB11FIP4	RAB11 family interacting protein 4 (class II)	4.84705e-13	5.08746e-09	1.0685
GO:0006810	transport	SEC22C	SEC22C	SEC22 vesicle trafficking protein homolog C (S. cerevisiae)	4.84705e-13	5.08746e-09	1.0685
GO:0006810	transport	TMED3	TMED3	transmembrane emp24 protein transport domain containing 3	4.84705e-13	5.08746e-09	1.0685
GO:0006810	transport	RAB29	RAB29	RAB29, member RAS oncogene family	4.84705e-13	5.08746e-09	1.0685
GO:0006810	transport	SLC12A3	SLC12A3	solute carrier family 12 (sodium/chloride transporter), member 3	4.84705e-13	5.08746e-09	1.0685
GO:0006810	transport	SLC25A26	SLC25A26	solute carrier family 25 (S-adenosylmethionine carrier), member 26	4.84705e-13	5.08746e-09	1.0685
GO:0006810	transport	SLC45A3	SLC45A3	solute carrier family 45, member 3	4.84705e-13	5.08746e-09	1.0685
GO:0006810	transport	TTYH3	TTYH3	tweety family member 3	4.84705e-13	5.08746e-09	1.0685
GO:0006810	transport	APOC2	APOC2	apolipoprotein C-II	4.84705e-13	5.08746e-09	1.0685
GO:0006810	transport	KCNA3	KCNA3	potassium voltage-gated channel, shaker-related subfamily, member 3	4.84705e-13	5.08746e-09	1.0685
GO:0006810	transport	AC097505.1	KCNIP4	Kv channel interacting protein 4	4.84705e-13	5.08746e-09	1.0685
GO:0006810	transport	APOL4	APOL4	apolipoprotein L, 4	4.84705e-13	5.08746e-09	1.0685
GO:0006810	transport	CLIP1	CLIP1	CAP-GLY domain containing linker protein 1	4.84705e-13	5.08746e-09	1.0685
GO:0006810	transport	SLC9A2	SLC9A2	solute carrier family 9, subfamily A (NHE2, cation proton antiporter 2), member 2	4.84705e-13	5.08746e-09	1.0685
GO:0006810	transport	COG5	COG5	component of oligomeric golgi complex 5	4.84705e-13	5.08746e-09	1.0685
GO:0006810	transport	ABCG8	ABCG8	ATP-binding cassette, sub-family G (WHITE), member 8	4.84705e-13	5.08746e-09	1.0685
GO:0006810	transport	TTPAL	TTPAL	tocopherol (alpha) transfer protein-like	4.84705e-13	5.08746e-09	1.0685
GO:0006810	transport	ACBD5	ACBD5	acyl-CoA binding domain containing 5	4.84705e-13	5.08746e-09	1.0685
GO:0006810	transport	ATP6V0D1	ATP6V0D1	ATPase, H+ transporting, lysosomal 38kDa, V0 subunit d1	4.84705e-13	5.08746e-09	1.0685
GO:0006810	transport	SLC35C2	SLC35C2	solute carrier family 35 (GDP-fucose transporter), member C2	4.84705e-13	5.08746e-09	1.0685
GO:0006810	transport	RBM8A	RBM8A	RNA binding motif protein 8A	4.84705e-13	5.08746e-09	1.0685
GO:0006810	transport	MIA3	MIA3	melanoma inhibitory activity family, member 3	4.84705e-13	5.08746e-09	1.0685
GO:0006810	transport	AC006450.2	DENND1A	DENN/MADD domain containing 1A	4.84705e-13	5.08746e-09	1.0685
GO:0006810	transport	AL049610.1	GLRA4	glycine receptor, alpha 4	4.84705e-13	5.08746e-09	1.0685
GO:0006810	transport	CATSPER3	CATSPER3	cation channel, sperm associated 3	4.84705e-13	5.08746e-09	1.0685
GO:0006810	transport	HOOK2	HOOK2	hook microtubule-tethering protein 2	4.84705e-13	5.08746e-09	1.0685
GO:0006810	transport	TIMM8B	TIMM8B	translocase of inner mitochondrial membrane 8 homolog B (yeast)	4.84705e-13	5.08746e-09	1.0685
GO:0006810	transport	AC021237.1	ENY2	enhancer of yellow 2 homolog (Drosophila)	4.84705e-13	5.08746e-09	1.0685
GO:0006810	transport	AC005529.1	THOC5	THO complex 5	4.84705e-13	5.08746e-09	1.0685
GO:0006810	transport	HOOK3	HOOK3	hook microtubule-tethering protein 3	4.84705e-13	5.08746e-09	1.0685
GO:0006810	transport	RAMP3	RAMP3	receptor (G protein-coupled) activity modifying protein 3	4.84705e-13	5.08746e-09	1.0685
GO:0006810	transport	IPO11	IPO11	importin 11	4.84705e-13	5.08746e-09	1.0685
GO:0006810	transport	TIMM22	TIMM22	translocase of inner mitochondrial membrane 22 homolog (yeast)	4.84705e-13	5.08746e-09	1.0685
GO:0006810	transport	TRAPPC4	TRAPPC4	trafficking protein particle complex 4	4.84705e-13	5.08746e-09	1.0685
GO:0006810	transport	LDLR	LDLR	low density lipoprotein receptor	4.84705e-13	5.08746e-09	1.0685
GO:0006810	transport	AC115619.1	APOB	apolipoprotein B	4.84705e-13	5.08746e-09	1.0685
GO:0006810	transport	AC079089.1	SLCO5A1	solute carrier organic anion transporter family, member 5A1	4.84705e-13	5.08746e-09	1.0685
GO:0006810	transport	CACNA1C	CACNA1C	calcium channel, voltage-dependent, L type, alpha 1C subunit	4.84705e-13	5.08746e-09	1.0685
GO:0006810	transport	DYNC1LI1	DYNC1LI1	dynein, cytoplasmic 1, light intermediate chain 1	4.84705e-13	5.08746e-09	1.0685
GO:0006810	transport	SLC25A53	SLC25A53	solute carrier family 25, member 53	4.84705e-13	5.08746e-09	1.0685
GO:0006810	transport	SLC7A5	SLC7A5	solute carrier family 7 (amino acid transporter light chain, L system), member 5	4.84705e-13	5.08746e-09	1.0685
GO:0006810	transport	NALCN	NALCN	sodium leak channel, non-selective	4.84705e-13	5.08746e-09	1.0685
GO:0006810	transport	RBP7	RBP7	retinol binding protein 7, cellular	4.84705e-13	5.08746e-09	1.0685
GO:0006810	transport	SNX4	SNX4	sorting nexin 4	4.84705e-13	5.08746e-09	1.0685
GO:0006810	transport	RAB20	RAB20	RAB20, member RAS oncogene family	4.84705e-13	5.08746e-09	1.0685
GO:0006810	transport	ATG9A	ATG9A	autophagy related 9A	4.84705e-13	5.08746e-09	1.0685
GO:0006810	transport	XPO5	XPO5	exportin 5	4.84705e-13	5.08746e-09	1.0685
GO:0006810	transport	SLC2A4	SLC2A4	solute carrier family 2 (facilitated glucose transporter), member 4	4.84705e-13	5.08746e-09	1.0685
GO:0006810	transport	RBP5	RBP5	retinol binding protein 5, cellular	4.84705e-13	5.08746e-09	1.0685
GO:0006810	transport	CNGB1	CNGB1	cyclic nucleotide gated channel beta 1	4.84705e-13	5.08746e-09	1.0685
GO:0006810	transport	VAMP3	VAMP3	vesicle-associated membrane protein 3	4.84705e-13	5.08746e-09	1.0685
GO:0006810	transport	VPS37A	VPS37A	vacuolar protein sorting 37 homolog A (S. cerevisiae)	4.84705e-13	5.08746e-09	1.0685
GO:0006810	transport	KCNJ14	KCNJ14	potassium inwardly-rectifying channel, subfamily J, member 14	4.84705e-13	5.08746e-09	1.0685
GO:0006810	transport	SLC13A4	SLC13A4	solute carrier family 13 (sodium/sulfate symporter), member 4	4.84705e-13	5.08746e-09	1.0685
GO:0006810	transport	NAPG	NAPG	N-ethylmaleimide-sensitive factor attachment protein, gamma	4.84705e-13	5.08746e-09	1.0685
GO:0006810	transport	NUP85	NUP85	nucleoporin 85kDa	4.84705e-13	5.08746e-09	1.0685
GO:0006810	transport	AC091393.1	SFXN1	sideroflexin 1	4.84705e-13	5.08746e-09	1.0685
GO:0006810	transport	SLC38A11	SLC38A11	solute carrier family 38, member 11	4.84705e-13	5.08746e-09	1.0685
GO:0006810	transport	MTCH1	MTCH1	mitochondrial carrier 1	4.84705e-13	5.08746e-09	1.0685
GO:0006810	transport	AL049830.2	AP4S1	adaptor-related protein complex 4, sigma 1 subunit	4.84705e-13	5.08746e-09	1.0685
GO:0006810	transport	CLVS1	CLVS1	clavesin 1	4.84705e-13	5.08746e-09	1.0685
GO:0006810	transport	KCNH5	KCNH5	potassium voltage-gated channel, subfamily H (eag-related), member 5	4.84705e-13	5.08746e-09	1.0685
GO:0006810	transport	TRPC3	TRPC3	transient receptor potential cation channel, subfamily C, member 3	4.84705e-13	5.08746e-09	1.0685
GO:0006810	transport	RUFY1	RUFY1	RUN and FYVE domain containing 1	4.84705e-13	5.08746e-09	1.0685
GO:0006810	transport	POLDIP3	POLDIP3	polymerase (DNA-directed), delta interacting protein 3	4.84705e-13	5.08746e-09	1.0685
GO:0006810	transport	AL133279.1	KCNK10	potassium channel, subfamily K, member 10	4.84705e-13	5.08746e-09	1.0685
GO:0006810	transport	AL356608.1	CNNM2	cyclin and CBS domain divalent metal cation transport mediator 2	4.84705e-13	5.08746e-09	1.0685
GO:0006810	transport	CACNA1D	CACNA1D	calcium channel, voltage-dependent, L type, alpha 1D subunit	4.84705e-13	5.08746e-09	1.0685
GO:0006810	transport	ATP6V1A	ATP6V1A	ATPase, H+ transporting, lysosomal 70kDa, V1 subunit A	4.84705e-13	5.08746e-09	1.0685
GO:0006810	transport	SYT2	SYT2	synaptotagmin II	4.84705e-13	5.08746e-09	1.0685
GO:0006810	transport	GET4	GET4	golgi to ER traffic protein 4 homolog (S. cerevisiae)	4.84705e-13	5.08746e-09	1.0685
GO:0006810	transport	EXOC6	EXOC6	exocyst complex component 6	4.84705e-13	5.08746e-09	1.0685
GO:0006810	transport	STXBP3	STXBP3	syntaxin binding protein 3	4.84705e-13	5.08746e-09	1.0685
GO:0006810	transport	FLVCR1	FLVCR1	feline leukemia virus subgroup C cellular receptor 1	4.84705e-13	5.08746e-09	1.0685
GO:0006810	transport	RILP	RILP	Rab interacting lysosomal protein	4.84705e-13	5.08746e-09	1.0685
GO:0006810	transport	SLC34A2	SLC34A2	solute carrier family 34 (type II sodium/phosphate contransporter), member 2	4.84705e-13	5.08746e-09	1.0685
GO:0006810	transport	AL139330.1	SNX9	sorting nexin 9	4.84705e-13	5.08746e-09	1.0685
GO:0006810	transport	SLC25A17	SLC25A17	solute carrier family 25 (mitochondrial carrier; peroxisomal membrane protein, 34kDa), member 17	4.84705e-13	5.08746e-09	1.0685
GO:0006810	transport	GABRG2	GABRG2	gamma-aminobutyric acid (GABA) A receptor, gamma 2	4.84705e-13	5.08746e-09	1.0685
GO:0006810	transport	TRAPPC12	TRAPPC12	trafficking protein particle complex 12	4.84705e-13	5.08746e-09	1.0685
GO:0006810	transport	ABCB1	ABCB1	ATP-binding cassette, sub-family B (MDR/TAP), member 1	4.84705e-13	5.08746e-09	1.0685
GO:0006810	transport	AP5Z1	AP5Z1	adaptor-related protein complex 5, zeta 1 subunit	4.84705e-13	5.08746e-09	1.0685
GO:0006810	transport	AC090644.1	TBC1D5	TBC1 domain family, member 5	4.84705e-13	5.08746e-09	1.0685
GO:0006810	transport	AC011676.2	SLC45A4	solute carrier family 45, member 4	4.84705e-13	5.08746e-09	1.0685
GO:0006810	transport	VPS18	VPS18	vacuolar protein sorting 18 homolog (S. cerevisiae)	4.84705e-13	5.08746e-09	1.0685
GO:0006810	transport	BTF3	BTF3	basic transcription factor 3	4.84705e-13	5.08746e-09	1.0685
GO:0006810	transport	RAB10	RAB10	RAB10, member RAS oncogene family	4.84705e-13	5.08746e-09	1.0685
GO:0006810	transport	UPF3B	UPF3B	UPF3 regulator of nonsense transcripts homolog B (yeast)	4.84705e-13	5.08746e-09	1.0685
GO:0006810	transport	TMED9	TMED9	transmembrane emp24 protein transport domain containing 9	4.84705e-13	5.08746e-09	1.0685
GO:0006810	transport	AP2A2	AP2A2	adaptor-related protein complex 2, alpha 2 subunit	4.84705e-13	5.08746e-09	1.0685
GO:0006810	transport	SEC31A	SEC31A	SEC31 homolog A (S. cerevisiae)	4.84705e-13	5.08746e-09	1.0685
GO:0006810	transport	FEZ1	FEZ1	fasciculation and elongation protein zeta 1 (zygin I)	4.84705e-13	5.08746e-09	1.0685
GO:0006810	transport	VPS25	VPS25	vacuolar protein sorting 25 homolog (S. cerevisiae)	4.84705e-13	5.08746e-09	1.0685
GO:0006810	transport	CYGB	CYGB	cytoglobin	4.84705e-13	5.08746e-09	1.0685
GO:0006810	transport	MLC1	MLC1	megalencephalic leukoencephalopathy with subcortical cysts 1	4.84705e-13	5.08746e-09	1.0685
GO:0006810	transport	OSBPL2	OSBPL2	oxysterol binding protein-like 2	4.84705e-13	5.08746e-09	1.0685
GO:0006810	transport	SLC17A9	SLC17A9	solute carrier family 17 (vesicular nucleotide transporter), member 9	4.84705e-13	5.08746e-09	1.0685
GO:0006810	transport	ESYT3	ESYT3	extended synaptotagmin-like protein 3	4.84705e-13	5.08746e-09	1.0685
GO:0006810	transport	SNX8	SNX8	sorting nexin 8	4.84705e-13	5.08746e-09	1.0685
GO:0006810	transport	AC002464.1	SLC22A16	solute carrier family 22 (organic cation/carnitine transporter), member 16	4.84705e-13	5.08746e-09	1.0685
GO:0006810	transport	TCIRG1	TCIRG1	T-cell, immune regulator 1, ATPase, H+ transporting, lysosomal V0 subunit A3	4.84705e-13	5.08746e-09	1.0685
GO:0006810	transport	KCNA4	KCNA4	potassium voltage-gated channel, shaker-related subfamily, member 4	4.84705e-13	5.08746e-09	1.0685
GO:0006810	transport	AP1S1	AP1S1	adaptor-related protein complex 1, sigma 1 subunit	4.84705e-13	5.08746e-09	1.0685
GO:0006810	transport	AC068669.1	CASC3	cancer susceptibility candidate 3	4.84705e-13	5.08746e-09	1.0685
GO:0006810	transport	TOMM40L	TOMM40L	translocase of outer mitochondrial membrane 40 homolog (yeast)-like	4.84705e-13	5.08746e-09	1.0685
GO:0006810	transport	AL356218.1	AQP3	aquaporin 3 (Gill blood group)	4.84705e-13	5.08746e-09	1.0685
GO:0006810	transport	DENND4C	DENND4C	DENN/MADD domain containing 4C	4.84705e-13	5.08746e-09	1.0685
GO:0006810	transport	TOM1	TOM1	target of myb1 (chicken)	4.84705e-13	5.08746e-09	1.0685
GO:0006810	transport	Z84492.1	CACNA2D2	calcium channel, voltage-dependent, alpha 2/delta subunit 2	4.84705e-13	5.08746e-09	1.0685
GO:0006810	transport	ABCC5	ABCC5	ATP-binding cassette, sub-family C (CFTR/MRP), member 5	4.84705e-13	5.08746e-09	1.0685
GO:0006810	transport	TTYH1	TTYH1	tweety family member 1	4.84705e-13	5.08746e-09	1.0685
GO:0006810	transport	SLC35D3	SLC35D3	solute carrier family 35, member D3	4.84705e-13	5.08746e-09	1.0685
GO:0006810	transport	AC090589.1	ARFGAP2	ADP-ribosylation factor GTPase activating protein 2	4.84705e-13	5.08746e-09	1.0685
GO:0006810	transport	ABCC2	ABCC2	ATP-binding cassette, sub-family C (CFTR/MRP), member 2	4.84705e-13	5.08746e-09	1.0685
GO:0006810	transport	SCN9A	SCN9A	sodium channel, voltage-gated, type IX, alpha subunit	4.84705e-13	5.08746e-09	1.0685
GO:0006810	transport	AP1G1	AP1G1	adaptor-related protein complex 1, gamma 1 subunit	4.84705e-13	5.08746e-09	1.0685
GO:0006810	transport	SYT17	SYT17	synaptotagmin XVII	4.84705e-13	5.08746e-09	1.0685
GO:0006810	transport	SEC24D	SEC24D	SEC24 family member D	4.84705e-13	5.08746e-09	1.0685
GO:0006810	transport	SNX30	SNX30	sorting nexin family member 30	4.84705e-13	5.08746e-09	1.0685
GO:0006810	transport	AC092675.2	CNGA3	cyclic nucleotide gated channel alpha 3	4.84705e-13	5.08746e-09	1.0685
GO:0006810	transport	SCNN1B	SCNN1B	sodium channel, non-voltage-gated 1, beta subunit	4.84705e-13	5.08746e-09	1.0685
GO:0006810	transport	DENND2A	DENND2A	DENN/MADD domain containing 2A	4.84705e-13	5.08746e-09	1.0685
GO:0006810	transport	CACNA2D1	CACNA2D1	calcium channel, voltage-dependent, alpha 2/delta subunit 1	4.84705e-13	5.08746e-09	1.0685
GO:0006810	transport	AP1S2	AP1S2	adaptor-related protein complex 1, sigma 2 subunit	4.84705e-13	5.08746e-09	1.0685
GO:0006810	transport	AC109779.1	KCNMB2	potassium large conductance calcium-activated channel, subfamily M, beta member 2	4.84705e-13	5.08746e-09	1.0685
GO:0006810	transport	KCNJ11	KCNJ11	potassium inwardly-rectifying channel, subfamily J, member 11	4.84705e-13	5.08746e-09	1.0685
GO:0006810	transport	AP5B1	AP5B1	adaptor-related protein complex 5, beta 1 subunit	4.84705e-13	5.08746e-09	1.0685
GO:0006810	transport	CACNG5	CACNG5	calcium channel, voltage-dependent, gamma subunit 5	4.84705e-13	5.08746e-09	1.0685
GO:0006810	transport	SLC24A5	SLC24A5	solute carrier family 24 (sodium/potassium/calcium exchanger), member 5	4.84705e-13	5.08746e-09	1.0685
GO:0006810	transport	NPTX1	NPTX1	neuronal pentraxin I	4.84705e-13	5.08746e-09	1.0685
GO:0006810	transport	BBS7	BBS7	Bardet-Biedl syndrome 7	4.84705e-13	5.08746e-09	1.0685
GO:0006810	transport	ATP1B1	ATP1B1	ATPase, Na+/K+ transporting, beta 1 polypeptide	4.84705e-13	5.08746e-09	1.0685
GO:0006810	transport	RBP4	RBP4	retinol binding protein 4, plasma	4.84705e-13	5.08746e-09	1.0685
GO:0006810	transport	AC022748.1	CHRNB4	cholinergic receptor, nicotinic, beta 4 (neuronal)	4.84705e-13	5.08746e-09	1.0685
GO:0006810	transport	ATP6V1C2	ATP6V1C2	ATPase, H+ transporting, lysosomal 42kDa, V1 subunit C2	4.84705e-13	5.08746e-09	1.0685
GO:0006810	transport	KIF18A	KIF18A	kinesin family member 18A	4.84705e-13	5.08746e-09	1.0685
GO:0006810	transport	PAM16	PAM16	presequence translocase-associated motor 16 homolog (S. cerevisiae)	4.84705e-13	5.08746e-09	1.0685
GO:0006810	transport	AL121761.1	SLC24A3	solute carrier family 24 (sodium/potassium/calcium exchanger), member 3	4.84705e-13	5.08746e-09	1.0685
GO:0006810	transport	RHBDF1	RHBDF1	rhomboid 5 homolog 1 (Drosophila)	4.84705e-13	5.08746e-09	1.0685
GO:0006810	transport	AP1B1	AP1B1	adaptor-related protein complex 1, beta 1 subunit	4.84705e-13	5.08746e-09	1.0685
GO:0006810	transport	TOMM6	TOMM6	translocase of outer mitochondrial membrane 6 homolog (yeast)	4.84705e-13	5.08746e-09	1.0685
GO:0006810	transport	ATP8B2	ATP8B2	ATPase, aminophospholipid transporter, class I, type 8B, member 2	4.84705e-13	5.08746e-09	1.0685
GO:0006810	transport	IGF2BP2	IGF2BP2	insulin-like growth factor 2 mRNA binding protein 2	4.84705e-13	5.08746e-09	1.0685
GO:0006810	transport	ATP1A4	ATP1A4	ATPase, Na+/K+ transporting, alpha 4 polypeptide	4.84705e-13	5.08746e-09	1.0685
GO:0006810	transport	LCN2	LCN2	lipocalin 2	4.84705e-13	5.08746e-09	1.0685
GO:0006810	transport	DGKD	DGKD	diacylglycerol kinase, delta 130kDa	4.84705e-13	5.08746e-09	1.0685
GO:0006810	transport	TRIM3	TRIM3	tripartite motif containing 3	4.84705e-13	5.08746e-09	1.0685
GO:0006810	transport	AP000753.1	RTN3	reticulon 3	4.84705e-13	5.08746e-09	1.0685
GO:0006810	transport	TMEM115	TMEM115	transmembrane protein 115	4.84705e-13	5.08746e-09	1.0685
GO:0006810	transport	AC005670.2	GOSR2	golgi SNAP receptor complex member 2	4.84705e-13	5.08746e-09	1.0685
GO:0006810	transport	CLCNKB	CLCNKB	chloride channel, voltage-sensitive Kb	4.84705e-13	5.08746e-09	1.0685
GO:0006810	transport	KCNAB2	KCNAB2	potassium voltage-gated channel, shaker-related subfamily, beta member 2	4.84705e-13	5.08746e-09	1.0685
GO:0006810	transport	ATP6V0A2	ATP6V0A2	ATPase, H+ transporting, lysosomal V0 subunit a2	4.84705e-13	5.08746e-09	1.0685
GO:0006810	transport	AP3B1	AP3B1	adaptor-related protein complex 3, beta 1 subunit	4.84705e-13	5.08746e-09	1.0685
GO:0006810	transport	SLC15A3	SLC15A3	solute carrier family 15 (oligopeptide transporter), member 3	4.84705e-13	5.08746e-09	1.0685
GO:0006810	transport	EXOC3	EXOC3	exocyst complex component 3	4.84705e-13	5.08746e-09	1.0685
GO:0006810	transport	TMED1	TMED1	transmembrane emp24 protein transport domain containing 1	4.84705e-13	5.08746e-09	1.0685
GO:0006810	transport	TMCO3	TMCO3	transmembrane and coiled-coil domains 3	4.84705e-13	5.08746e-09	1.0685
GO:0006810	transport	TRPM1	TRPM1	transient receptor potential cation channel, subfamily M, member 1	4.84705e-13	5.08746e-09	1.0685
GO:0006810	transport	ITPR3	ITPR3	inositol 1,4,5-trisphosphate receptor, type 3	4.84705e-13	5.08746e-09	1.0685
GO:0006810	transport	SLC25A15	SLC25A15	solute carrier family 25 (mitochondrial carrier; ornithine transporter) member 15	4.84705e-13	5.08746e-09	1.0685
GO:0006810	transport	CACNG6	CACNG6	calcium channel, voltage-dependent, gamma subunit 6	4.84705e-13	5.08746e-09	1.0685
GO:0006810	transport	GJA3	GJA3	gap junction protein, alpha 3, 46kDa	4.84705e-13	5.08746e-09	1.0685
GO:0006810	transport	AC016722.2	MCFD2	multiple coagulation factor deficiency 2	4.84705e-13	5.08746e-09	1.0685
GO:0006810	transport	AL390036.1	SLC25A24	solute carrier family 25 (mitochondrial carrier; phosphate carrier), member 24	4.84705e-13	5.08746e-09	1.0685
GO:0006810	transport	CACNA1F	CACNA1F	calcium channel, voltage-dependent, L type, alpha 1F subunit	4.84705e-13	5.08746e-09	1.0685
GO:0006810	transport	SLC25A30	SLC25A30	solute carrier family 25, member 30	4.84705e-13	5.08746e-09	1.0685
GO:0006810	transport	SLC30A4	SLC30A4	solute carrier family 30 (zinc transporter), member 4	4.84705e-13	5.08746e-09	1.0685
GO:0006810	transport	LCN10	LCN10	lipocalin 10	4.84705e-13	5.08746e-09	1.0685
GO:0006810	transport	SNX24	SNX24	sorting nexin 24	4.84705e-13	5.08746e-09	1.0685
GO:0006810	transport	AC011242.1	ABCG5	ATP-binding cassette, sub-family G (WHITE), member 5	4.84705e-13	5.08746e-09	1.0685
GO:0006810	transport	VPS28	VPS28	vacuolar protein sorting 28 homolog (S. cerevisiae)	4.84705e-13	5.08746e-09	1.0685
GO:0006810	transport	CATSPER1	CATSPER1	cation channel, sperm associated 1	4.84705e-13	5.08746e-09	1.0685
GO:0006810	transport	KPNA6	KPNA6	karyopherin alpha 6 (importin alpha 7)	4.84705e-13	5.08746e-09	1.0685
GO:0006810	transport	BBS9	BBS9	Bardet-Biedl syndrome 9	4.84705e-13	5.08746e-09	1.0685
GO:0006810	transport	NGB	NGB	neuroglobin	4.84705e-13	5.08746e-09	1.0685
GO:0006810	transport	KCNQ2	KCNQ2	potassium voltage-gated channel, KQT-like subfamily, member 2	4.84705e-13	5.08746e-09	1.0685
GO:0006810	transport	AC008250.2	ABCC9	ATP-binding cassette, sub-family C (CFTR/MRP), member 9	4.84705e-13	5.08746e-09	1.0685
GO:0006810	transport	AL391840.1	LCA5	Leber congenital amaurosis 5	4.84705e-13	5.08746e-09	1.0685
GO:0006810	transport	MCU	MCU	mitochondrial calcium uniporter	4.84705e-13	5.08746e-09	1.0685
GO:0006810	transport	AC124798.2	ABCC8	ATP-binding cassette, sub-family C (CFTR/MRP), member 8	4.84705e-13	5.08746e-09	1.0685
GO:0006810	transport	RILPL1	RILPL1	Rab interacting lysosomal protein-like 1	4.84705e-13	5.08746e-09	1.0685
GO:0006810	transport	PRAF2	PRAF2	PRA1 domain family, member 2	4.84705e-13	5.08746e-09	1.0685
GO:0006810	transport	AL049745.1	NDC1	NDC1 transmembrane nucleoporin	4.84705e-13	5.08746e-09	1.0685
GO:0006810	transport	CLCC1	CLCC1	chloride channel CLIC-like 1	4.84705e-13	5.08746e-09	1.0685
GO:0006810	transport	AQP8	AQP8	aquaporin 8	4.84705e-13	5.08746e-09	1.0685
GO:0006810	transport	KCNQ4	KCNQ4	potassium voltage-gated channel, KQT-like subfamily, member 4	4.84705e-13	5.08746e-09	1.0685
GO:0006810	transport	RAB2B	RAB2B	RAB2B, member RAS oncogene family	4.84705e-13	5.08746e-09	1.0685
GO:0006810	transport	MRS2	MRS2	MRS2 magnesium transporter	4.84705e-13	5.08746e-09	1.0685
GO:0006810	transport	APOL5	APOL5	apolipoprotein L, 5	4.84705e-13	5.08746e-09	1.0685
GO:0006810	transport	VDAC1	VDAC1	voltage-dependent anion channel 1	4.84705e-13	5.08746e-09	1.0685
GO:0006810	transport	SLC6A4	SLC6A4	solute carrier family 6 (neurotransmitter transporter), member 4	4.84705e-13	5.08746e-09	1.0685
GO:0006810	transport	SLC15A4	SLC15A4	solute carrier family 15 (oligopeptide transporter), member 4	4.84705e-13	5.08746e-09	1.0685
GO:0006810	transport	RAB14	RAB14	RAB14, member RAS oncogene family	4.84705e-13	5.08746e-09	1.0685
GO:0006810	transport	SFXN2	SFXN2	sideroflexin 2	4.84705e-13	5.08746e-09	1.0685
GO:0006810	transport	COG4	COG4	component of oligomeric golgi complex 4	4.84705e-13	5.08746e-09	1.0685
GO:0006810	transport	CPTP	CPTP	ceramide-1-phosphate transfer protein	4.84705e-13	5.08746e-09	1.0685
GO:0006810	transport	SLC17A5	SLC17A5	solute carrier family 17 (acidic sugar transporter), member 5	4.84705e-13	5.08746e-09	1.0685
GO:0006810	transport	PRELID1	PRELID1	PRELI domain containing 1	4.84705e-13	5.08746e-09	1.0685
GO:0006810	transport	TRPM7	TRPM7	transient receptor potential cation channel, subfamily M, member 7	4.84705e-13	5.08746e-09	1.0685
GO:0006810	transport	SCNN1G	SCNN1G	sodium channel, non-voltage-gated 1, gamma subunit	4.84705e-13	5.08746e-09	1.0685
GO:0006810	transport	RAN	RAN	RAN, member RAS oncogene family	4.84705e-13	5.08746e-09	1.0685
GO:0006810	transport	SLCO1A2	SLCO1A2	solute carrier organic anion transporter family, member 1A2	4.84705e-13	5.08746e-09	1.0685
GO:0006810	transport	SCN3B	SCN3B	sodium channel, voltage-gated, type III, beta subunit	4.84705e-13	5.08746e-09	1.0685
GO:0006810	transport	AC006207.1	CRACR2A	calcium release activated channel regulator 2A	4.84705e-13	5.08746e-09	1.0685
GO:0006810	transport	HCN2	HCN2	hyperpolarization activated cyclic nucleotide-gated potassium channel 2	4.84705e-13	5.08746e-09	1.0685
GO:0006810	transport	SLC39A8	SLC39A8	solute carrier family 39 (zinc transporter), member 8	4.84705e-13	5.08746e-09	1.0685
GO:0006810	transport	ABCD4	ABCD4	ATP-binding cassette, sub-family D (ALD), member 4	4.84705e-13	5.08746e-09	1.0685
GO:0006810	transport	ATP6V0A1	ATP6V0A1	ATPase, H+ transporting, lysosomal V0 subunit a1	4.84705e-13	5.08746e-09	1.0685
GO:0006810	transport	AL354712.1	LRRC38	leucine rich repeat containing 38	4.84705e-13	5.08746e-09	1.0685
GO:0006810	transport	CHMP7	CHMP7	charged multivesicular body protein 7	4.84705e-13	5.08746e-09	1.0685
GO:0006810	transport	RHOBTB3	RHOBTB3	Rho-related BTB domain containing 3	4.84705e-13	5.08746e-09	1.0685
GO:0006810	transport	AL356580.1	IPO5	importin 5	4.84705e-13	5.08746e-09	1.0685
GO:0006810	transport	RAB36	RAB36	RAB36, member RAS oncogene family	4.84705e-13	5.08746e-09	1.0685
GO:0006810	transport	AC104170.1	EPS15	epidermal growth factor receptor pathway substrate 15	4.84705e-13	5.08746e-09	1.0685
GO:0006810	transport	SEC61A1	SEC61A1	Sec61 alpha 1 subunit (S. cerevisiae)	4.84705e-13	5.08746e-09	1.0685
GO:0006810	transport	SCN1A	SCN1A	sodium channel, voltage-gated, type I, alpha subunit	4.84705e-13	5.08746e-09	1.0685
GO:0006810	transport	AP001425.1	KCNJ15	potassium inwardly-rectifying channel, subfamily J, member 15	4.84705e-13	5.08746e-09	1.0685
GO:0006810	transport	CLN3	CLN3	ceroid-lipofuscinosis, neuronal 3	4.84705e-13	5.08746e-09	1.0685
GO:0006810	transport	MTX3	MTX3	metaxin 3	4.84705e-13	5.08746e-09	1.0685
GO:0006810	transport	TIMM21	TIMM21	translocase of inner mitochondrial membrane 21 homolog (yeast)	4.84705e-13	5.08746e-09	1.0685
GO:0006810	transport	SLC22A1	SLC22A1	solute carrier family 22 (organic cation transporter), member 1	4.84705e-13	5.08746e-09	1.0685
GO:0006810	transport	TRAM1	TRAM1	translocation associated membrane protein 1	4.84705e-13	5.08746e-09	1.0685
GO:0006810	transport	SLC5A10	SLC5A10	solute carrier family 5 (sodium/sugar cotransporter), member 10	4.84705e-13	5.08746e-09	1.0685
GO:0006810	transport	TRAPPC5	TRAPPC5	trafficking protein particle complex 5	4.84705e-13	5.08746e-09	1.0685
GO:0006810	transport	G3BP2	G3BP2	GTPase activating protein (SH3 domain) binding protein 2	4.84705e-13	5.08746e-09	1.0685
GO:0006810	transport	GPIHBP1	GPIHBP1	glycosylphosphatidylinositol anchored high density lipoprotein binding protein 1	4.84705e-13	5.08746e-09	1.0685
GO:0006810	transport	RBM22	RBM22	RNA binding motif protein 22	4.84705e-13	5.08746e-09	1.0685
GO:0006810	transport	APOC1	APOC1	apolipoprotein C-I	4.84705e-13	5.08746e-09	1.0685
GO:0006810	transport	XPO6	XPO6	exportin 6	4.84705e-13	5.08746e-09	1.0685
GO:0006810	transport	AL121785.1	KCNG1	potassium voltage-gated channel, subfamily G, member 1	4.84705e-13	5.08746e-09	1.0685
GO:0006810	transport	TOMM20	TOMM20	translocase of outer mitochondrial membrane 20 homolog (yeast)	4.84705e-13	5.08746e-09	1.0685
GO:0006810	transport	SCAMP1	SCAMP1	secretory carrier membrane protein 1	4.84705e-13	5.08746e-09	1.0685
GO:0006810	transport	COG6	COG6	component of oligomeric golgi complex 6	4.84705e-13	5.08746e-09	1.0685
GO:0006810	transport	TRAK2	TRAK2	trafficking protein, kinesin binding 2	4.84705e-13	5.08746e-09	1.0685
GO:0006810	transport	EXOC8	EXOC8	exocyst complex component 8	4.84705e-13	5.08746e-09	1.0685
GO:0006810	transport	EIF5A	EIF5A	eukaryotic translation initiation factor 5A	4.84705e-13	5.08746e-09	1.0685
GO:0006810	transport	FABP9	FABP9	fatty acid binding protein 9, testis	4.84705e-13	5.08746e-09	1.0685
GO:0006810	transport	RFT1	RFT1	RFT1 homolog (S. cerevisiae)	4.84705e-13	5.08746e-09	1.0685
GO:0006810	transport	SLC43A2	SLC43A2	solute carrier family 43 (amino acid system L transporter), member 2	4.84705e-13	5.08746e-09	1.0685
GO:0006810	transport	AC027419.1	SLC30A8	solute carrier family 30 (zinc transporter), member 8	4.84705e-13	5.08746e-09	1.0685
GO:0006810	transport	SLC2A3	SLC2A3	solute carrier family 2 (facilitated glucose transporter), member 3	4.84705e-13	5.08746e-09	1.0685
GO:0006810	transport	AC114402.1	ATP2B4	ATPase, Ca++ transporting, plasma membrane 4	4.84705e-13	5.08746e-09	1.0685
GO:0006810	transport	AC006042.1	ICA1	islet cell autoantigen 1, 69kDa	4.84705e-13	5.08746e-09	1.0685
GO:0006810	transport	ATP6V0A4	ATP6V0A4	ATPase, H+ transporting, lysosomal V0 subunit a4	4.84705e-13	5.08746e-09	1.0685
GO:0006810	transport	RHOB	RHOB	ras homolog family member B	4.84705e-13	5.08746e-09	1.0685
GO:0006810	transport	COG3	COG3	component of oligomeric golgi complex 3	4.84705e-13	5.08746e-09	1.0685
GO:0006810	transport	GOT2	GOT2	glutamic-oxaloacetic transaminase 2, mitochondrial	4.84705e-13	5.08746e-09	1.0685
GO:0006810	transport	OBP2B	OBP2B	odorant binding protein 2B	4.84705e-13	5.08746e-09	1.0685
GO:0006810	transport	AC116903.1	SLCO3A1	solute carrier organic anion transporter family, member 3A1	4.84705e-13	5.08746e-09	1.0685
GO:0006810	transport	KCNH8	KCNH8	potassium voltage-gated channel, subfamily H (eag-related), member 8	4.84705e-13	5.08746e-09	1.0685
GO:0006810	transport	SNAP23	SNAP23	synaptosomal-associated protein, 23kDa	4.84705e-13	5.08746e-09	1.0685
GO:0006810	transport	RHCG	RHCG	Rh family, C glycoprotein	4.84705e-13	5.08746e-09	1.0685
GO:0006810	transport	STAM2	STAM2	signal transducing adaptor molecule (SH3 domain and ITAM motif) 2	4.84705e-13	5.08746e-09	1.0685
GO:0006810	transport	KCNK7	KCNK7	potassium channel, subfamily K, member 7	4.84705e-13	5.08746e-09	1.0685
GO:0006810	transport	SERPINA6	SERPINA6	serpin peptidase inhibitor, clade A (alpha-1 antiproteinase, antitrypsin), member 6	4.84705e-13	5.08746e-09	1.0685
GO:0006810	transport	CLDN15	CLDN15	claudin 15	4.84705e-13	5.08746e-09	1.0685
GO:0006810	transport	SLC7A6	SLC7A6	solute carrier family 7 (amino acid transporter light chain, y+L system), member 6	4.84705e-13	5.08746e-09	1.0685
GO:0006810	transport	VTA1	VTA1	vesicle (multivesicular body) trafficking 1	4.84705e-13	5.08746e-09	1.0685
GO:0006810	transport	AC079905.1	SLC16A7	solute carrier family 16 (monocarboxylate transporter), member 7	4.84705e-13	5.08746e-09	1.0685
GO:0006810	transport	AP2M1	AP2M1	adaptor-related protein complex 2, mu 1 subunit	4.84705e-13	5.08746e-09	1.0685
GO:0006810	transport	SCNN1A	SCNN1A	sodium channel, non-voltage-gated 1 alpha subunit	4.84705e-13	5.08746e-09	1.0685
GO:0006810	transport	VPS53	VPS53	vacuolar protein sorting 53 homolog (S. cerevisiae)	4.84705e-13	5.08746e-09	1.0685
GO:0006810	transport	HTR3E	HTR3E	5-hydroxytryptamine (serotonin) receptor 3E, ionotropic	4.84705e-13	5.08746e-09	1.0685
GO:0006810	transport	SLC22A17	SLC22A17	solute carrier family 22, member 17	4.84705e-13	5.08746e-09	1.0685
GO:0006810	transport	TMED7-TICAM2	TMED7-TICAM2	TMED7-TICAM2 readthrough	4.84705e-13	5.08746e-09	1.0685
GO:0006810	transport	SLC9A3	SLC9A3	solute carrier family 9, subfamily A (NHE3, cation proton antiporter 3), member 3	4.84705e-13	5.08746e-09	1.0685
GO:0006810	transport	SLC25A12	SLC25A12	solute carrier family 25 (aspartate/glutamate carrier), member 12	4.84705e-13	5.08746e-09	1.0685
GO:0006810	transport	TRPM4	TRPM4	transient receptor potential cation channel, subfamily M, member 4	4.84705e-13	5.08746e-09	1.0685
GO:0006810	transport	SNAP29	SNAP29	synaptosomal-associated protein, 29kDa	4.84705e-13	5.08746e-09	1.0685
GO:0006810	transport	SLCO1C1	SLCO1C1	solute carrier organic anion transporter family, member 1C1	4.84705e-13	5.08746e-09	1.0685
GO:0006810	transport	PEA15	PEA15	phosphoprotein enriched in astrocytes 15	4.84705e-13	5.08746e-09	1.0685
GO:0006810	transport	AP002530.1	GRIK2	glutamate receptor, ionotropic, kainate 2	4.84705e-13	5.08746e-09	1.0685
GO:0006810	transport	TNPO2	TNPO2	transportin 2	4.84705e-13	5.08746e-09	1.0685
GO:0006810	transport	AC020633.1	DNAJC13	DnaJ (Hsp40) homolog, subfamily C, member 13	4.84705e-13	5.08746e-09	1.0685
GO:0006810	transport	SNX16	SNX16	sorting nexin 16	4.84705e-13	5.08746e-09	1.0685
GO:0006810	transport	SLC7A7	SLC7A7	solute carrier family 7 (amino acid transporter light chain, y+L system), member 7	4.84705e-13	5.08746e-09	1.0685
GO:0006810	transport	RAB8A	RAB8A	RAB8A, member RAS oncogene family	4.84705e-13	5.08746e-09	1.0685
GO:0006810	transport	MPC2	MPC2	mitochondrial pyruvate carrier 2	4.84705e-13	5.08746e-09	1.0685
GO:0006810	transport	SLC9A6	SLC9A6	solute carrier family 9, subfamily A (NHE6, cation proton antiporter 6), member 6	4.84705e-13	5.08746e-09	1.0685
GO:0006810	transport	CCDC22	CCDC22	coiled-coil domain containing 22	4.84705e-13	5.08746e-09	1.0685
GO:0006810	transport	CHRNB2	CHRNB2	cholinergic receptor, nicotinic, beta 2 (neuronal)	4.84705e-13	5.08746e-09	1.0685
GO:0006810	transport	AC093117.1	ABCD3	ATP-binding cassette, sub-family D (ALD), member 3	4.84705e-13	5.08746e-09	1.0685
GO:0006810	transport	RAB35	RAB35	RAB35, member RAS oncogene family	4.84705e-13	5.08746e-09	1.0685
GO:0006810	transport	AL445531.1	NCBP1	nuclear cap binding protein subunit 1, 80kDa	4.84705e-13	5.08746e-09	1.0685
GO:0006810	transport	AP5S1	AP5S1	adaptor-related protein complex 5, sigma 1 subunit	4.84705e-13	5.08746e-09	1.0685
GO:0006810	transport	KCNMB4	KCNMB4	potassium large conductance calcium-activated channel, subfamily M, beta member 4	4.84705e-13	5.08746e-09	1.0685
GO:0006810	transport	SLC25A44	SLC25A44	solute carrier family 25, member 44	4.84705e-13	5.08746e-09	1.0685
GO:0006810	transport	CACNG4	CACNG4	calcium channel, voltage-dependent, gamma subunit 4	4.84705e-13	5.08746e-09	1.0685
GO:0006810	transport	SNX3	SNX3	sorting nexin 3	4.84705e-13	5.08746e-09	1.0685
GO:0006810	transport	SLC6A19	SLC6A19	solute carrier family 6 (neutral amino acid transporter), member 19	4.84705e-13	5.08746e-09	1.0685
GO:0006810	transport	SLC12A6	SLC12A6	solute carrier family 12 (potassium/chloride transporter), member 6	4.84705e-13	5.08746e-09	1.0685
GO:0006810	transport	CHRNB3	CHRNB3	cholinergic receptor, nicotinic, beta 3 (neuronal)	4.84705e-13	5.08746e-09	1.0685
GO:0006810	transport	SLC22A3	SLC22A3	solute carrier family 22 (organic cation transporter), member 3	4.84705e-13	5.08746e-09	1.0685
GO:0006810	transport	SLC25A16	SLC25A16	solute carrier family 25 (mitochondrial carrier), member 16	4.84705e-13	5.08746e-09	1.0685
GO:0006810	transport	SNX6	SNX6	sorting nexin 6	4.84705e-13	5.08746e-09	1.0685
GO:0006810	transport	OSBPL1A	OSBPL1A	oxysterol binding protein-like 1A	4.84705e-13	5.08746e-09	1.0685
GO:0006810	transport	BBS2	BBS2	Bardet-Biedl syndrome 2	4.84705e-13	5.08746e-09	1.0685
GO:0006810	transport	CHMP2B	CHMP2B	charged multivesicular body protein 2B	4.84705e-13	5.08746e-09	1.0685
GO:0006810	transport	SCN10A	SCN10A	sodium channel, voltage-gated, type X, alpha subunit	4.84705e-13	5.08746e-09	1.0685
GO:0006810	transport	AC138360.1	ANO4	anoctamin 4	4.84705e-13	5.08746e-09	1.0685
GO:0006810	transport	KDELR1	KDELR1	KDEL (Lys-Asp-Glu-Leu) endoplasmic reticulum protein retention receptor 1	4.84705e-13	5.08746e-09	1.0685
GO:0006810	transport	AC117945.1	GRIK3	glutamate receptor, ionotropic, kainate 3	4.84705e-13	5.08746e-09	1.0685
GO:0006810	transport	AC108667.1	ECT2	epithelial cell transforming 2	4.84705e-13	5.08746e-09	1.0685
GO:0006810	transport	AL020995.1	AZIN2	antizyme inhibitor 2	4.84705e-13	5.08746e-09	1.0685
GO:0006810	transport	AP001180.4	PIEZO2	piezo-type mechanosensitive ion channel component 2	4.84705e-13	5.08746e-09	1.0685
GO:0006810	transport	RABEP2	RABEP2	rabaptin, RAB GTPase binding effector protein 2	4.84705e-13	5.08746e-09	1.0685
GO:0006810	transport	MOB4	MOB4	MOB family member 4, phocein	4.84705e-13	5.08746e-09	1.0685
GO:0006810	transport	SVOP	SVOP	SV2 related protein homolog (rat)	4.84705e-13	5.08746e-09	1.0685
GO:0006810	transport	KCNA2	KCNA2	potassium voltage-gated channel, shaker-related subfamily, member 2	4.84705e-13	5.08746e-09	1.0685
GO:0006810	transport	NKD2	NKD2	naked cuticle homolog 2 (Drosophila)	4.84705e-13	5.08746e-09	1.0685
GO:0006810	transport	SLC5A11	SLC5A11	solute carrier family 5 (sodium/inositol cotransporter), member 11	4.84705e-13	5.08746e-09	1.0685
GO:0006810	transport	VPS13A	VPS13A	vacuolar protein sorting 13 homolog A (S. cerevisiae)	4.84705e-13	5.08746e-09	1.0685
GO:0006810	transport	GABRR2	GABRR2	gamma-aminobutyric acid (GABA) A receptor, rho 2	4.84705e-13	5.08746e-09	1.0685
GO:0006810	transport	SLC31A2	SLC31A2	solute carrier family 31 (copper transporter), member 2	4.84705e-13	5.08746e-09	1.0685
GO:0006810	transport	AL121988.1	GJA4	gap junction protein, alpha 4, 37kDa	4.84705e-13	5.08746e-09	1.0685
GO:0006810	transport	SLC2A8	SLC2A8	solute carrier family 2 (facilitated glucose transporter), member 8	4.84705e-13	5.08746e-09	1.0685
GO:0006810	transport	SLC15A1	SLC15A1	solute carrier family 15 (oligopeptide transporter), member 1	4.84705e-13	5.08746e-09	1.0685
GO:0006810	transport	ARFGAP1	ARFGAP1	ADP-ribosylation factor GTPase activating protein 1	4.84705e-13	5.08746e-09	1.0685
GO:0006810	transport	ASIC3	ASIC3	acid-sensing (proton-gated) ion channel 3	4.84705e-13	5.08746e-09	1.0685
GO:0006810	transport	AC012146.1	SLC52A1	solute carrier family 52 (riboflavin transporter), member 1	4.84705e-13	5.08746e-09	1.0685
GO:0006810	transport	MYO1C	MYO1C	myosin IC	4.84705e-13	5.08746e-09	1.0685
GO:0006810	transport	HVCN1	HVCN1	hydrogen voltage-gated channel 1	4.84705e-13	5.08746e-09	1.0685
GO:0006810	transport	NUPL2	NUPL2	nucleoporin like 2	4.84705e-13	5.08746e-09	1.0685
GO:0006810	transport	SLC8A3	SLC8A3	solute carrier family 8 (sodium/calcium exchanger), member 3	4.84705e-13	5.08746e-09	1.0685
GO:0006810	transport	TTYH2	TTYH2	tweety family member 2	4.84705e-13	5.08746e-09	1.0685
GO:0006810	transport	AP3M1	AP3M1	adaptor-related protein complex 3, mu 1 subunit	4.84705e-13	5.08746e-09	1.0685
GO:0006810	transport	PIEZO1	PIEZO1	piezo-type mechanosensitive ion channel component 1	4.84705e-13	5.08746e-09	1.0685
GO:0006810	transport	SERPINA5	SERPINA5	serpin peptidase inhibitor, clade A (alpha-1 antiproteinase, antitrypsin), member 5	4.84705e-13	5.08746e-09	1.0685
GO:0006810	transport	UPF3A	UPF3A	UPF3 regulator of nonsense transcripts homolog A (yeast)	4.84705e-13	5.08746e-09	1.0685
GO:0006810	transport	AC008133.2	ASIC2	acid-sensing (proton-gated) ion channel 2	4.84705e-13	5.08746e-09	1.0685
GO:0006810	transport	RHAG	RHAG	Rh-associated glycoprotein	4.84705e-13	5.08746e-09	1.0685
GO:0006810	transport	AC097484.2	ABCG2	ATP-binding cassette, sub-family G (WHITE), member 2 (Junior blood group)	4.84705e-13	5.08746e-09	1.0685
GO:0006810	transport	SMDT1	SMDT1	single-pass membrane protein with aspartate-rich tail 1	4.84705e-13	5.08746e-09	1.0685
GO:0006810	transport	AC009562.1	CHRNA7	cholinergic receptor, nicotinic, alpha 7 (neuronal)	4.84705e-13	5.08746e-09	1.0685
GO:0006810	transport	ABCF2	ABCF2	ATP-binding cassette, sub-family F (GCN20), member 2	4.84705e-13	5.08746e-09	1.0685
GO:0006810	transport	NECAP2	NECAP2	NECAP endocytosis associated 2	4.84705e-13	5.08746e-09	1.0685
GO:0006810	transport	AC108727.2	SLC25A36	solute carrier family 25 (pyrimidine nucleotide carrier ), member 36	4.84705e-13	5.08746e-09	1.0685
GO:0006810	transport	CACNA1E	CACNA1E	calcium channel, voltage-dependent, R type, alpha 1E subunit	4.84705e-13	5.08746e-09	1.0685
GO:0006810	transport	SLC30A1	SLC30A1	solute carrier family 30 (zinc transporter), member 1	4.84705e-13	5.08746e-09	1.0685
GO:0006810	transport	AP002795.1	HEPHL1	hephaestin-like 1	4.84705e-13	5.08746e-09	1.0685
GO:0006810	transport	SRSF1	SRSF1	serine/arginine-rich splicing factor 1	4.84705e-13	5.08746e-09	1.0685
GO:0006810	transport	AC011475.1	SLC44A2	solute carrier family 44 (choline transporter), member 2	4.84705e-13	5.08746e-09	1.0685
GO:0006810	transport	SLC35D1	SLC35D1	solute carrier family 35 (UDP-GlcA/UDP-GalNAc transporter), member D1	4.84705e-13	5.08746e-09	1.0685
GO:0006810	transport	AL024507.1	SEC63	SEC63 homolog (S. cerevisiae)	4.84705e-13	5.08746e-09	1.0685
GO:0006810	transport	SYT8	SYT8	synaptotagmin VIII	4.84705e-13	5.08746e-09	1.0685
GO:0006810	transport	AC084368.1	SLC25A13	solute carrier family 25 (aspartate/glutamate carrier), member 13	4.84705e-13	5.08746e-09	1.0685
GO:0006810	transport	CLIC6	CLIC6	chloride intracellular channel 6	4.84705e-13	5.08746e-09	1.0685
GO:0006810	transport	NUP107	NUP107	nucleoporin 107kDa	4.84705e-13	5.08746e-09	1.0685
GO:0006810	transport	RINT1	RINT1	RAD50 interactor 1	4.84705e-13	5.08746e-09	1.0685
GO:0006810	transport	BCAP31	BCAP31	B-cell receptor-associated protein 31	4.84705e-13	5.08746e-09	1.0685
GO:0006810	transport	AP000879.2	ANO1	anoctamin 1, calcium activated chloride channel	4.84705e-13	5.08746e-09	1.0685
GO:0006810	transport	AL391335.1	SNX27	sorting nexin family member 27	4.84705e-13	5.08746e-09	1.0685
GO:0006810	transport	HBZ	HBZ	hemoglobin, zeta	4.84705e-13	5.08746e-09	1.0685
GO:0006810	transport	HTR3B	HTR3B	5-hydroxytryptamine (serotonin) receptor 3B, ionotropic	4.84705e-13	5.08746e-09	1.0685
GO:0006810	transport	SLCO2A1	SLCO2A1	solute carrier organic anion transporter family, member 2A1	4.84705e-13	5.08746e-09	1.0685
GO:0006810	transport	NXF1	NXF1	nuclear RNA export factor 1	4.84705e-13	5.08746e-09	1.0685
GO:0006810	transport	AL121987.2	ATP1A2	ATPase, Na+/K+ transporting, alpha 2 polypeptide	4.84705e-13	5.08746e-09	1.0685
GO:0006810	transport	RAB38	RAB38	RAB38, member RAS oncogene family	4.84705e-13	5.08746e-09	1.0685
GO:0006810	transport	CLCNKA	CLCNKA	chloride channel, voltage-sensitive Ka	4.84705e-13	5.08746e-09	1.0685
GO:0006810	transport	SLC17A8	SLC17A8	solute carrier family 17 (vesicular glutamate transporter), member 8	4.84705e-13	5.08746e-09	1.0685
GO:0006810	transport	ATP6V1G2	ATP6V1G2	ATPase, H+ transporting, lysosomal 13kDa, V1 subunit G2	4.84705e-13	5.08746e-09	1.0685
GO:0006810	transport	DYNC1I1	DYNC1I1	dynein, cytoplasmic 1, intermediate chain 1	4.84705e-13	5.08746e-09	1.0685
GO:0006810	transport	USE1	USE1	unconventional SNARE in the ER 1 homolog (S. cerevisiae)	4.84705e-13	5.08746e-09	1.0685
GO:0006810	transport	SLC16A12	SLC16A12	solute carrier family 16, member 12	4.84705e-13	5.08746e-09	1.0685
GO:0006810	transport	AP4B1	AP4B1	adaptor-related protein complex 4, beta 1 subunit	4.84705e-13	5.08746e-09	1.0685
GO:0006810	transport	UCP2	UCP2	uncoupling protein 2 (mitochondrial, proton carrier)	4.84705e-13	5.08746e-09	1.0685
GO:0006810	transport	AC018371.1	AQP4	aquaporin 4	4.84705e-13	5.08746e-09	1.0685
GO:0006810	transport	TRAPPC3L	TRAPPC3L	trafficking protein particle complex 3-like	4.84705e-13	5.08746e-09	1.0685
GO:0006810	transport	SLC5A6	SLC5A6	solute carrier family 5 (sodium/multivitamin and iodide cotransporter), member 6	4.84705e-13	5.08746e-09	1.0685
GO:0006810	transport	SDAD1	SDAD1	SDA1 domain containing 1	4.84705e-13	5.08746e-09	1.0685
GO:0006810	transport	TRIM72	TRIM72	tripartite motif containing 72, E3 ubiquitin protein ligase	4.84705e-13	5.08746e-09	1.0685
GO:0006810	transport	STX1B	STX1B	syntaxin 1B	4.84705e-13	5.08746e-09	1.0685
GO:0006810	transport	TIMM13	TIMM13	translocase of inner mitochondrial membrane 13 homolog (yeast)	4.84705e-13	5.08746e-09	1.0685
GO:0006810	transport	SYS1	SYS1	Sys1 golgi trafficking protein	4.84705e-13	5.08746e-09	1.0685
GO:0006810	transport	ZDHHC13	ZDHHC13	zinc finger, DHHC-type containing 13	4.84705e-13	5.08746e-09	1.0685
GO:0006810	transport	CNNM4	CNNM4	cyclin and CBS domain divalent metal cation transport mediator 4	4.84705e-13	5.08746e-09	1.0685
GO:0006810	transport	SV2B	SV2B	synaptic vesicle glycoprotein 2B	4.84705e-13	5.08746e-09	1.0685
GO:0006810	transport	GABRG1	GABRG1	gamma-aminobutyric acid (GABA) A receptor, gamma 1	4.84705e-13	5.08746e-09	1.0685
GO:0006810	transport	OSCP1	OSCP1	organic solute carrier partner 1	4.84705e-13	5.08746e-09	1.0685
GO:0006810	transport	CLIC5	CLIC5	chloride intracellular channel 5	4.84705e-13	5.08746e-09	1.0685
GO:0006810	transport	AP005432.2	RALBP1	ralA binding protein 1	4.84705e-13	5.08746e-09	1.0685
GO:0006810	transport	SLC39A5	SLC39A5	solute carrier family 39 (zinc transporter), member 5	4.84705e-13	5.08746e-09	1.0685
GO:0006810	transport	VAMP8	VAMP8	vesicle-associated membrane protein 8	4.84705e-13	5.08746e-09	1.0685
GO:0006810	transport	GJB2	GJB2	gap junction protein, beta 2, 26kDa	4.84705e-13	5.08746e-09	1.0685
GO:0006810	transport	KCNK9	KCNK9	potassium channel, subfamily K, member 9	4.84705e-13	5.08746e-09	1.0685
GO:0006810	transport	SLC35F2	SLC35F2	solute carrier family 35, member F2	4.84705e-13	5.08746e-09	1.0685
GO:0006810	transport	ATP7B	ATP7B	ATPase, Cu++ transporting, beta polypeptide	4.84705e-13	5.08746e-09	1.0685
GO:0006810	transport	SEC31B	SEC31B	SEC31 homolog B (S. cerevisiae)	4.84705e-13	5.08746e-09	1.0685
GO:0006810	transport	EIF5A2	EIF5A2	eukaryotic translation initiation factor 5A2	4.84705e-13	5.08746e-09	1.0685
GO:0006810	transport	SLC29A2	SLC29A2	solute carrier family 29 (equilibrative nucleoside transporter), member 2	4.84705e-13	5.08746e-09	1.0685
GO:0006810	transport	RLBP1	RLBP1	retinaldehyde binding protein 1	4.84705e-13	5.08746e-09	1.0685
GO:0006810	transport	AC084128.1	ATP6V0D2	ATPase, H+ transporting, lysosomal 38kDa, V0 subunit d2	4.84705e-13	5.08746e-09	1.0685
GO:0006810	transport	ITPR1	ITPR1	inositol 1,4,5-trisphosphate receptor, type 1	4.84705e-13	5.08746e-09	1.0685
GO:0006810	transport	RAB17	RAB17	RAB17, member RAS oncogene family	4.84705e-13	5.08746e-09	1.0685
GO:0006810	transport	NUP93	NUP93	nucleoporin 93kDa	4.84705e-13	5.08746e-09	1.0685
GO:0006810	transport	AC092442.1	JAKMIP1	janus kinase and microtubule interacting protein 1	4.84705e-13	5.08746e-09	1.0685
GO:0006810	transport	AP2B1	AP2B1	adaptor-related protein complex 2, beta 1 subunit	4.84705e-13	5.08746e-09	1.0685
GO:0006810	transport	AL731556.2	KCNMA1	potassium large conductance calcium-activated channel, subfamily M, alpha member 1	4.84705e-13	5.08746e-09	1.0685
GO:0006810	transport	AL590714.1	APOA2	apolipoprotein A-II	4.84705e-13	5.08746e-09	1.0685
GO:0006810	transport	PIK3R2	PIK3R2	phosphoinositide-3-kinase, regulatory subunit 2 (beta)	4.84705e-13	5.08746e-09	1.0685
GO:0006810	transport	AC022762.1	CNGA4	cyclic nucleotide gated channel alpha 4	4.84705e-13	5.08746e-09	1.0685
GO:0006810	transport	AC008953.1	TNPO1	transportin 1	4.84705e-13	5.08746e-09	1.0685
GO:0006810	transport	TSPO2	TSPO2	translocator protein 2	4.84705e-13	5.08746e-09	1.0685
GO:0006810	transport	KCNH6	KCNH6	potassium voltage-gated channel, subfamily H (eag-related), member 6	4.84705e-13	5.08746e-09	1.0685
GO:0006810	transport	AL079304.1	SLC25A21	solute carrier family 25 (mitochondrial oxoadipate carrier), member 21	4.84705e-13	5.08746e-09	1.0685
GO:0006810	transport	DNAJC19	DNAJC19	DnaJ (Hsp40) homolog, subfamily C, member 19	4.84705e-13	5.08746e-09	1.0685
GO:0006810	transport	CACNB2	CACNB2	calcium channel, voltage-dependent, beta 2 subunit	4.84705e-13	5.08746e-09	1.0685
GO:0006810	transport	GRIN3A	GRIN3A	glutamate receptor, ionotropic, N-methyl-D-aspartate 3A	4.84705e-13	5.08746e-09	1.0685
GO:0006810	transport	DYNLL2	DYNLL2	dynein, light chain, LC8-type 2	4.84705e-13	5.08746e-09	1.0685
GO:0006810	transport	PTPN23	PTPN23	protein tyrosine phosphatase, non-receptor type 23	4.84705e-13	5.08746e-09	1.0685
GO:0006810	transport	DMBT1	DMBT1	deleted in malignant brain tumors 1	4.84705e-13	5.08746e-09	1.0685
GO:0006810	transport	SNX7	SNX7	sorting nexin 7	4.84705e-13	5.08746e-09	1.0685
GO:0006810	transport	SLC22A7	SLC22A7	solute carrier family 22 (organic anion transporter), member 7	4.84705e-13	5.08746e-09	1.0685
GO:0006810	transport	NUP205	NUP205	nucleoporin 205kDa	4.84705e-13	5.08746e-09	1.0685
GO:0006810	transport	SLC16A14	SLC16A14	solute carrier family 16, member 14	4.84705e-13	5.08746e-09	1.0685
GO:0006810	transport	COPG2	COPG2	coatomer protein complex, subunit gamma 2	4.84705e-13	5.08746e-09	1.0685
GO:0006810	transport	SNX22	SNX22	sorting nexin 22	4.84705e-13	5.08746e-09	1.0685
GO:0006810	transport	OSBPL6	OSBPL6	oxysterol binding protein-like 6	4.84705e-13	5.08746e-09	1.0685
GO:0006810	transport	AC083798.2	KPNA1	karyopherin alpha 1 (importin alpha 5)	4.84705e-13	5.08746e-09	1.0685
GO:0006810	transport	ABCB6	ABCB6	ATP-binding cassette, sub-family B (MDR/TAP), member 6 (Langereis blood group)	4.84705e-13	5.08746e-09	1.0685
GO:0006810	transport	ATG10	ATG10	autophagy related 10	4.84705e-13	5.08746e-09	1.0685
GO:0006810	transport	SLC35B1	SLC35B1	solute carrier family 35, member B1	4.84705e-13	5.08746e-09	1.0685
GO:0006810	transport	RHBDF2	RHBDF2	rhomboid 5 homolog 2 (Drosophila)	4.84705e-13	5.08746e-09	1.0685
GO:0006810	transport	SLC29A4	SLC29A4	solute carrier family 29 (equilibrative nucleoside transporter), member 4	4.84705e-13	5.08746e-09	1.0685
GO:0006810	transport	SLC23A1	SLC23A1	solute carrier family 23 (ascorbic acid transporter), member 1	4.84705e-13	5.08746e-09	1.0685
GO:0006810	transport	SLC4A5	SLC4A5	solute carrier family 4 (sodium bicarbonate cotransporter), member 5	4.84705e-13	5.08746e-09	1.0685
GO:0006810	transport	SFT2D3	SFT2D3	SFT2 domain containing 3	4.84705e-13	5.08746e-09	1.0685
GO:0006810	transport	RAB24	RAB24	RAB24, member RAS oncogene family	4.84705e-13	5.08746e-09	1.0685
GO:0006810	transport	SLC38A2	SLC38A2	solute carrier family 38, member 2	4.84705e-13	5.08746e-09	1.0685
GO:0006810	transport	SLC6A8	SLC6A8	solute carrier family 6 (neurotransmitter transporter), member 8	4.84705e-13	5.08746e-09	1.0685
GO:0006810	transport	PPID	PPID	peptidylprolyl isomerase D	4.84705e-13	5.08746e-09	1.0685
GO:0006810	transport	AC113194.1	ATP6V1H	ATPase, H+ transporting, lysosomal 50/57kDa, V1 subunit H	4.84705e-13	5.08746e-09	1.0685
GO:0006810	transport	KCNJ9	KCNJ9	potassium inwardly-rectifying channel, subfamily J, member 9	4.84705e-13	5.08746e-09	1.0685
GO:0006810	transport	FOLR1	FOLR1	folate receptor 1 (adult)	4.84705e-13	5.08746e-09	1.0685
GO:0006810	transport	KCNK18	KCNK18	potassium channel, subfamily K, member 18	4.84705e-13	5.08746e-09	1.0685
GO:0006810	transport	SCN4B	SCN4B	sodium channel, voltage-gated, type IV, beta subunit	4.84705e-13	5.08746e-09	1.0685
GO:0006810	transport	ATP6V1C1	ATP6V1C1	ATPase, H+ transporting, lysosomal 42kDa, V1 subunit C1	4.84705e-13	5.08746e-09	1.0685
GO:0006810	transport	SLC9A7	SLC9A7	solute carrier family 9, subfamily A (NHE7, cation proton antiporter 7), member 7	4.84705e-13	5.08746e-09	1.0685
GO:0006810	transport	AP3M2	AP3M2	adaptor-related protein complex 3, mu 2 subunit	4.84705e-13	5.08746e-09	1.0685
GO:0006810	transport	KIF16B	KIF16B	kinesin family member 16B	4.84705e-13	5.08746e-09	1.0685
GO:0006810	transport	STRA6	STRA6	stimulated by retinoic acid 6	4.84705e-13	5.08746e-09	1.0685
GO:0006810	transport	SYTL4	SYTL4	synaptotagmin-like 4	4.84705e-13	5.08746e-09	1.0685
GO:0006810	transport	AL158151.3	CRAT	carnitine O-acetyltransferase	4.84705e-13	5.08746e-09	1.0685
GO:0006810	transport	SLC19A1	SLC19A1	solute carrier family 19 (folate transporter), member 1	4.84705e-13	5.08746e-09	1.0685
GO:0006810	transport	AC011298.2	AQP12B	aquaporin 12B	4.84705e-13	5.08746e-09	1.0685
GO:0006810	transport	AC118344.1	AKT2	v-akt murine thymoma viral oncogene homolog 2	4.84705e-13	5.08746e-09	1.0685
GO:0006810	transport	ATP2A3	ATP2A3	ATPase, Ca++ transporting, ubiquitous	4.84705e-13	5.08746e-09	1.0685
GO:0006810	transport	SNX15	SNX15	sorting nexin 15	4.84705e-13	5.08746e-09	1.0685
GO:0006810	transport	SLC30A5	SLC30A5	solute carrier family 30 (zinc transporter), member 5	4.84705e-13	5.08746e-09	1.0685
GO:0006810	transport	TMED10	TMED10	transmembrane emp24-like trafficking protein 10 (yeast)	4.84705e-13	5.08746e-09	1.0685
GO:0006810	transport	SLC12A4	SLC12A4	solute carrier family 12 (potassium/chloride transporter), member 4	4.84705e-13	5.08746e-09	1.0685
GO:0006810	transport	SLC4A2	SLC4A2	solute carrier family 4 (anion exchanger), member 2	4.84705e-13	5.08746e-09	1.0685
GO:0006810	transport	GRIN2B	GRIN2B	glutamate receptor, ionotropic, N-methyl D-aspartate 2B	4.84705e-13	5.08746e-09	1.0685
GO:0006810	transport	AL109897.1	MYO6	myosin VI	4.84705e-13	5.08746e-09	1.0685
GO:0006810	transport	COG2	COG2	component of oligomeric golgi complex 2	4.84705e-13	5.08746e-09	1.0685
GO:0006810	transport	RAB11FIP5	RAB11FIP5	RAB11 family interacting protein 5 (class I)	4.84705e-13	5.08746e-09	1.0685
GO:0006810	transport	RILPL2	RILPL2	Rab interacting lysosomal protein-like 2	4.84705e-13	5.08746e-09	1.0685
GO:0006810	transport	AC002985.1	COPE	coatomer protein complex, subunit epsilon	4.84705e-13	5.08746e-09	1.0685
GO:0006810	transport	PITPNM2	PITPNM2	phosphatidylinositol transfer protein, membrane-associated 2	4.84705e-13	5.08746e-09	1.0685
GO:0006810	transport	ZMAT3	ZMAT3	zinc finger, matrin-type 3	4.84705e-13	5.08746e-09	1.0685
GO:0006810	transport	KCND3	KCND3	potassium voltage-gated channel, Shal-related subfamily, member 3	4.84705e-13	5.08746e-09	1.0685
GO:0006810	transport	AL136376.1	ATP1A1	ATPase, Na+/K+ transporting, alpha 1 polypeptide	4.84705e-13	5.08746e-09	1.0685
GO:0006810	transport	TRAPPC10	TRAPPC10	trafficking protein particle complex 10	4.84705e-13	5.08746e-09	1.0685
GO:0006810	transport	ZG16	ZG16	zymogen granule protein 16	4.84705e-13	5.08746e-09	1.0685
GO:0006810	transport	SLC25A40	SLC25A40	solute carrier family 25, member 40	4.84705e-13	5.08746e-09	1.0685
GO:0006810	transport	CHRNA1	CHRNA1	cholinergic receptor, nicotinic, alpha 1 (muscle)	4.84705e-13	5.08746e-09	1.0685
GO:0006810	transport	NMD3	NMD3	NMD3 ribosome export adaptor	4.84705e-13	5.08746e-09	1.0685
GO:0006810	transport	SLC6A1	SLC6A1	solute carrier family 6 (neurotransmitter transporter), member 1	4.84705e-13	5.08746e-09	1.0685
GO:0006810	transport	SLC38A3	SLC38A3	solute carrier family 38, member 3	4.84705e-13	5.08746e-09	1.0685
GO:0006810	transport	COPA	COPA	coatomer protein complex, subunit alpha	4.84705e-13	5.08746e-09	1.0685
GO:0006810	transport	ATP6V1G3	ATP6V1G3	ATPase, H+ transporting, lysosomal 13kDa, V1 subunit G3	4.84705e-13	5.08746e-09	1.0685
GO:0006810	transport	KCNS3	KCNS3	potassium voltage-gated channel, delayed-rectifier, subfamily S, member 3	4.84705e-13	5.08746e-09	1.0685
GO:0006810	transport	SNX2	SNX2	sorting nexin 2	4.84705e-13	5.08746e-09	1.0685
GO:0006810	transport	BET1	BET1	Bet1 golgi vesicular membrane trafficking protein	4.84705e-13	5.08746e-09	1.0685
GO:0006810	transport	VCP	VCP	valosin containing protein	4.84705e-13	5.08746e-09	1.0685
GO:0006810	transport	LTF	LTF	lactotransferrin	4.84705e-13	5.08746e-09	1.0685
GO:0006810	transport	STXBP5L	STXBP5L	syntaxin binding protein 5-like	4.84705e-13	5.08746e-09	1.0685
GO:0006810	transport	AC008378.1	CREBRF	CREB3 regulatory factor	4.84705e-13	5.08746e-09	1.0685
GO:0006810	transport	ESYT1	ESYT1	extended synaptotagmin-like protein 1	4.84705e-13	5.08746e-09	1.0685
GO:0006810	transport	PDZK1	PDZK1	PDZ domain containing 1	4.84705e-13	5.08746e-09	1.0685
GO:0006810	transport	ARFGAP3	ARFGAP3	ADP-ribosylation factor GTPase activating protein 3	4.84705e-13	5.08746e-09	1.0685
GO:0006810	transport	OAZ1	OAZ1	ornithine decarboxylase antizyme 1	4.84705e-13	5.08746e-09	1.0685
GO:0006810	transport	SNX17	SNX17	sorting nexin 17	4.84705e-13	5.08746e-09	1.0685
GO:0006810	transport	BSPRY	BSPRY	B-box and SPRY domain containing	4.84705e-13	5.08746e-09	1.0685
GO:0006810	transport	SLC22A23	SLC22A23	solute carrier family 22, member 23	4.84705e-13	5.08746e-09	1.0685
GO:0006810	transport	CHMP1B	CHMP1B	charged multivesicular body protein 1B	4.84705e-13	5.08746e-09	1.0685
GO:0006810	transport	STAM	STAM	signal transducing adaptor molecule (SH3 domain and ITAM motif) 1	4.84705e-13	5.08746e-09	1.0685
GO:0006810	transport	SLC9A1	SLC9A1	solute carrier family 9, subfamily A (NHE1, cation proton antiporter 1), member 1	4.84705e-13	5.08746e-09	1.0685
GO:0006810	transport	SEC16A	SEC16A	SEC16 homolog A (S. cerevisiae)	4.84705e-13	5.08746e-09	1.0685
GO:0006810	transport	KCNG4	KCNG4	potassium voltage-gated channel, subfamily G, member 4	4.84705e-13	5.08746e-09	1.0685
GO:0006810	transport	AL080250.1	TMEM30A	transmembrane protein 30A	4.84705e-13	5.08746e-09	1.0685
GO:0006810	transport	SLC1A4	SLC1A4	solute carrier family 1 (glutamate/neutral amino acid transporter), member 4	4.84705e-13	5.08746e-09	1.0685
GO:0006810	transport	SCN1B	SCN1B	sodium channel, voltage-gated, type I, beta subunit	4.84705e-13	5.08746e-09	1.0685
GO:0006810	transport	AL031705.1	CLCN7	chloride channel, voltage-sensitive 7	4.84705e-13	5.08746e-09	1.0685
GO:0006810	transport	SEC22A	SEC22A	SEC22 vesicle trafficking protein homolog A (S. cerevisiae)	4.84705e-13	5.08746e-09	1.0685
GO:0006810	transport	AD000090.1	ATP4A	ATPase, H+/K+ exchanging, alpha polypeptide	4.84705e-13	5.08746e-09	1.0685
GO:0006810	transport	AL450405.1	SLC35F1	solute carrier family 35, member F1	4.84705e-13	5.08746e-09	1.0685
GO:0006810	transport	SLC38A4	SLC38A4	solute carrier family 38, member 4	4.84705e-13	5.08746e-09	1.0685
GO:0006810	transport	ATP2C1	ATP2C1	ATPase, Ca++ transporting, type 2C, member 1	4.84705e-13	5.08746e-09	1.0685
GO:0006810	transport	RAB33B	RAB33B	RAB33B, member RAS oncogene family	4.84705e-13	5.08746e-09	1.0685
GO:0006810	transport	AL359182.2	ABCA1	ATP-binding cassette, sub-family A (ABC1), member 1	4.84705e-13	5.08746e-09	1.0685
GO:0006810	transport	CHRNA2	CHRNA2	cholinergic receptor, nicotinic, alpha 2 (neuronal)	4.84705e-13	5.08746e-09	1.0685
GO:0006810	transport	RAB18	RAB18	RAB18, member RAS oncogene family	4.84705e-13	5.08746e-09	1.0685
GO:0006810	transport	SLC35F5	SLC35F5	solute carrier family 35, member F5	4.84705e-13	5.08746e-09	1.0685
GO:0006810	transport	AC112240.1	GRIA2	glutamate receptor, ionotropic, AMPA 2	4.84705e-13	5.08746e-09	1.0685
GO:0006810	transport	RAB23	RAB23	RAB23, member RAS oncogene family	4.84705e-13	5.08746e-09	1.0685
GO:0006810	transport	SLC22A18	SLC22A18	solute carrier family 22, member 18	4.84705e-13	5.08746e-09	1.0685
GO:0006810	transport	MFSD4B	KIAA1919	KIAA1919	4.84705e-13	5.08746e-09	1.0685
GO:0006810	transport	SLC9C2	SLC9C2	solute carrier family 9, member C2 (putative)	4.84705e-13	5.08746e-09	1.0685
GO:0006810	transport	CACNA2D3	CACNA2D3	calcium channel, voltage-dependent, alpha 2/delta subunit 3	4.84705e-13	5.08746e-09	1.0685
GO:0006810	transport	APOL6	APOL6	apolipoprotein L, 6	4.84705e-13	5.08746e-09	1.0685
GO:0006810	transport	SLC5A12	SLC5A12	solute carrier family 5 (sodium/monocarboxylate cotransporter), member 12	4.84705e-13	5.08746e-09	1.0685
GO:0006810	transport	SLC16A10	SLC16A10	solute carrier family 16 (aromatic amino acid transporter), member 10	4.84705e-13	5.08746e-09	1.0685
GO:0006810	transport	AC025040.1	ATP8B4	ATPase, class I, type 8B, member 4	4.84705e-13	5.08746e-09	1.0685
GO:0006810	transport	KCNE1	KCNE1	potassium voltage-gated channel, Isk-related family, member 1	4.84705e-13	5.08746e-09	1.0685
GO:0006810	transport	AC113189.2	CHRNB1	cholinergic receptor, nicotinic, beta 1 (muscle)	4.84705e-13	5.08746e-09	1.0685
GO:0006810	transport	AC093458.1	ATP6V0E2	ATPase, H+ transporting V0 subunit e2	4.84705e-13	5.08746e-09	1.0685
GO:0006810	transport	AC018761.2	ASNA1	arsA arsenite transporter, ATP-binding, homolog 1 (bacterial)	4.84705e-13	5.08746e-09	1.0685
GO:0006810	transport	TMC6	TMC6	transmembrane channel-like 6	4.84705e-13	5.08746e-09	1.0685
GO:0006810	transport	MCUB	CCDC109B	coiled-coil domain containing 109B	4.84705e-13	5.08746e-09	1.0685
GO:0006810	transport	PAEP	PAEP	progestagen-associated endometrial protein	4.84705e-13	5.08746e-09	1.0685
GO:0006810	transport	FABP1	FABP1	fatty acid binding protein 1, liver	4.84705e-13	5.08746e-09	1.0685
GO:0006810	transport	DBNL	DBNL	drebrin-like	4.84705e-13	5.08746e-09	1.0685
GO:0006810	transport	ABCB8	ABCB8	ATP-binding cassette, sub-family B (MDR/TAP), member 8	4.84705e-13	5.08746e-09	1.0685
GO:0006810	transport	SLC30A2	SLC30A2	solute carrier family 30 (zinc transporter), member 2	4.84705e-13	5.08746e-09	1.0685
GO:0006810	transport	GRIK1	GRIK1	glutamate receptor, ionotropic, kainate 1	4.84705e-13	5.08746e-09	1.0685
GO:0006810	transport	SLC10A1	SLC10A1	solute carrier family 10 (sodium/bile acid cotransporter), member 1	4.84705e-13	5.08746e-09	1.0685
GO:0006810	transport	KCNQ1	KCNQ1	potassium voltage-gated channel, KQT-like subfamily, member 1	4.84705e-13	5.08746e-09	1.0685
GO:0006810	transport	SLC6A7	SLC6A7	solute carrier family 6 (neurotransmitter transporter), member 7	4.84705e-13	5.08746e-09	1.0685
GO:0006810	transport	CHRNA6	CHRNA6	cholinergic receptor, nicotinic, alpha 6 (neuronal)	4.84705e-13	5.08746e-09	1.0685
GO:0006810	transport	SLC43A1	SLC43A1	solute carrier family 43 (amino acid system L transporter), member 1	4.84705e-13	5.08746e-09	1.0685
GO:0006810	transport	SIL1	SIL1	SIL1 nucleotide exchange factor	4.84705e-13	5.08746e-09	1.0685
GO:0006810	transport	RAB3IP	RAB3IP	RAB3A interacting protein	4.84705e-13	5.08746e-09	1.0685
GO:0006810	transport	KCNK12	KCNK12	potassium channel, subfamily K, member 12	4.84705e-13	5.08746e-09	1.0685
GO:0006810	transport	SLC36A1	SLC36A1	solute carrier family 36 (proton/amino acid symporter), member 1	4.84705e-13	5.08746e-09	1.0685
GO:0006810	transport	AL391152.1	EXOC5	exocyst complex component 5	4.84705e-13	5.08746e-09	1.0685
GO:0006810	transport	BBS4	BBS4	Bardet-Biedl syndrome 4	4.84705e-13	5.08746e-09	1.0685
GO:0006810	transport	CACNB3	CACNB3	calcium channel, voltage-dependent, beta 3 subunit	4.84705e-13	5.08746e-09	1.0685
GO:0006810	transport	SLC7A8	SLC7A8	solute carrier family 7 (amino acid transporter light chain, L system), member 8	4.84705e-13	5.08746e-09	1.0685
GO:0006810	transport	LAPTM5	LAPTM5	lysosomal protein transmembrane 5	4.84705e-13	5.08746e-09	1.0685
GO:0006810	transport	LMAN2	LMAN2	lectin, mannose-binding 2	4.84705e-13	5.08746e-09	1.0685
GO:0006810	transport	SEC22B	SEC22B	SEC22 vesicle trafficking protein homolog B (S. cerevisiae) (gene/pseudogene)	4.84705e-13	5.08746e-09	1.0685
GO:0006810	transport	HBQ1	HBQ1	hemoglobin, theta 1	4.84705e-13	5.08746e-09	1.0685
GO:0006810	transport	TRIM27	TRIM27	tripartite motif containing 27	4.84705e-13	5.08746e-09	1.0685
GO:0006810	transport	RAB4B	RAB4B	RAB4B, member RAS oncogene family	4.84705e-13	5.08746e-09	1.0685
GO:0006810	transport	HCN3	HCN3	hyperpolarization activated cyclic nucleotide-gated potassium channel 3	4.84705e-13	5.08746e-09	1.0685
GO:0006810	transport	SLC23A3	SLC23A3	solute carrier family 23, member 3	4.84705e-13	5.08746e-09	1.0685
GO:0006810	transport	AC130456.2	TMC5	transmembrane channel-like 5	4.84705e-13	5.08746e-09	1.0685
GO:0006810	transport	AC090227.2	MYO5B	myosin VB	4.84705e-13	5.08746e-09	1.0685
GO:0006810	transport	KPNA5	KPNA5	karyopherin alpha 5 (importin alpha 6)	4.84705e-13	5.08746e-09	1.0685
GO:0006810	transport	SLC4A11	SLC4A11	solute carrier family 4, sodium borate transporter, member 11	4.84705e-13	5.08746e-09	1.0685
GO:0006810	transport	APOA1	APOA1	apolipoprotein A-I	4.84705e-13	5.08746e-09	1.0685
GO:0006810	transport	SLC9B1	SLC9B1	solute carrier family 9, subfamily B (NHA1, cation proton antiporter 1), member 1	4.84705e-13	5.08746e-09	1.0685
GO:0006810	transport	STARD3	STARD3	StAR-related lipid transfer (START) domain containing 3	4.84705e-13	5.08746e-09	1.0685
GO:0006810	transport	ABCA6	ABCA6	ATP-binding cassette, sub-family A (ABC1), member 6	4.84705e-13	5.08746e-09	1.0685
GO:0006810	transport	SLC40A1	SLC40A1	solute carrier family 40 (iron-regulated transporter), member 1	4.84705e-13	5.08746e-09	1.0685
GO:0006810	transport	PEX26	PEX26	peroxisomal biogenesis factor 26	4.84705e-13	5.08746e-09	1.0685
GO:0006810	transport	PARP4	PARP4	poly (ADP-ribose) polymerase family, member 4	4.84705e-13	5.08746e-09	1.0685
GO:0006810	transport	SLC25A38	SLC25A38	solute carrier family 25, member 38	4.84705e-13	5.08746e-09	1.0685
GO:0006810	transport	TRPV4	TRPV4	transient receptor potential cation channel, subfamily V, member 4	4.84705e-13	5.08746e-09	1.0685
GO:0006810	transport	AC003102.1	SLC4A1	solute carrier family 4 (anion exchanger), member 1 (Diego blood group)	4.84705e-13	5.08746e-09	1.0685
GO:0006810	transport	AC091962.1	GRIA1	glutamate receptor, ionotropic, AMPA 1	4.84705e-13	5.08746e-09	1.0685
GO:0006810	transport	OSBPL7	OSBPL7	oxysterol binding protein-like 7	4.84705e-13	5.08746e-09	1.0685
GO:0006810	transport	NUP155	NUP155	nucleoporin 155kDa	4.84705e-13	5.08746e-09	1.0685
GO:0006810	transport	QKI	QKI	QKI, KH domain containing, RNA binding	4.84705e-13	5.08746e-09	1.0685
GO:0006810	transport	AC138965.3	THOC3	THO complex 3	4.84705e-13	5.08746e-09	1.0685
GO:0006810	transport	SLC25A37	SLC25A37	solute carrier family 25 (mitochondrial iron transporter), member 37	4.84705e-13	5.08746e-09	1.0685
GO:0006810	transport	KCNJ10	KCNJ10	potassium inwardly-rectifying channel, subfamily J, member 10	4.84705e-13	5.08746e-09	1.0685
GO:0006810	transport	GRIN2C	GRIN2C	glutamate receptor, ionotropic, N-methyl D-aspartate 2C	4.84705e-13	5.08746e-09	1.0685
GO:0006810	transport	SFXN4	SFXN4	sideroflexin 4	4.84705e-13	5.08746e-09	1.0685
GO:0006810	transport	RANBP2	RANBP2	RAN binding protein 2	4.84705e-13	5.08746e-09	1.0685
GO:0006810	transport	MAGOH	MAGOH	mago-nashi homolog, proliferation-associated (Drosophila)	4.84705e-13	5.08746e-09	1.0685
GO:0006810	transport	KCNE3	KCNE3	potassium voltage-gated channel, Isk-related family, member 3	4.84705e-13	5.08746e-09	1.0685
GO:0006810	transport	C15orf38-AP3S2	C15orf38-AP3S2	C15orf38-AP3S2 readthrough	4.84705e-13	5.08746e-09	1.0685
GO:0006810	transport	ENSA	ENSA	endosulfine alpha	4.84705e-13	5.08746e-09	1.0685
GO:0006810	transport	ABCA8	ABCA8	ATP-binding cassette, sub-family A (ABC1), member 8	4.84705e-13	5.08746e-09	1.0685
GO:0006810	transport	AC093423.2	LRRC8C	leucine rich repeat containing 8 family, member C	4.84705e-13	5.08746e-09	1.0685
GO:0006810	transport	FXYD4	FXYD4	FXYD domain containing ion transport regulator 4	4.84705e-13	5.08746e-09	1.0685
GO:0006810	transport	AC091271.1	DHX40	DEAH (Asp-Glu-Ala-His) box polypeptide 40	4.84705e-13	5.08746e-09	1.0685
GO:0006810	transport	AC080037.1	SLC39A11	solute carrier family 39, member 11	4.84705e-13	5.08746e-09	1.0685
GO:0006810	transport	RAB7B	RAB7B	RAB7B, member RAS oncogene family	4.84705e-13	5.08746e-09	1.0685
GO:0006810	transport	Z82243.1	NUP50	nucleoporin 50kDa	4.84705e-13	5.08746e-09	1.0685
GO:0006810	transport	P2RX7	P2RX7	purinergic receptor P2X, ligand-gated ion channel, 7	4.84705e-13	5.08746e-09	1.0685
GO:0006810	transport	NUP43	NUP43	nucleoporin 43kDa	4.84705e-13	5.08746e-09	1.0685
GO:0006810	transport	AC092473.1	MPC1L	mitochondrial pyruvate carrier 1-like	4.84705e-13	5.08746e-09	1.0685
GO:0006810	transport	LRPPRC	LRPPRC	leucine-rich pentatricopeptide repeat containing	4.84705e-13	5.08746e-09	1.0685
GO:0006810	transport	AL136379.1	ARF1	ADP-ribosylation factor 1	4.84705e-13	5.08746e-09	1.0685
GO:0006810	transport	SLC25A33	SLC25A33	solute carrier family 25 (pyrimidine nucleotide carrier), member 33	4.84705e-13	5.08746e-09	1.0685
GO:0006810	transport	DCTN1	DCTN1	dynactin 1	4.84705e-13	5.08746e-09	1.0685
GO:0006810	transport	ATP6V1D	ATP6V1D	ATPase, H+ transporting, lysosomal 34kDa, V1 subunit D	4.84705e-13	5.08746e-09	1.0685
GO:0006810	transport	SYT4	SYT4	synaptotagmin IV	4.84705e-13	5.08746e-09	1.0685
GO:0006810	transport	SLC41A2	SLC41A2	solute carrier family 41 (magnesium transporter), member 2	4.84705e-13	5.08746e-09	1.0685
GO:0006810	transport	C5orf30	C5orf30	chromosome 5 open reading frame 30	4.84705e-13	5.08746e-09	1.0685
GO:0006810	transport	IPO8	IPO8	importin 8	4.84705e-13	5.08746e-09	1.0685
GO:0006810	transport	ZW10	ZW10	zw10 kinetochore protein	4.84705e-13	5.08746e-09	1.0685
GO:0006810	transport	ZFPL1	ZFPL1	zinc finger protein-like 1	4.84705e-13	5.08746e-09	1.0685
GO:0006810	transport	STX1A	STX1A	syntaxin 1A (brain)	4.84705e-13	5.08746e-09	1.0685
GO:0006810	transport	KCNJ1	KCNJ1	potassium inwardly-rectifying channel, subfamily J, member 1	4.84705e-13	5.08746e-09	1.0685
GO:0006810	transport	AC108019.1	UCP1	uncoupling protein 1 (mitochondrial, proton carrier)	4.84705e-13	5.08746e-09	1.0685
GO:0006810	transport	NIPA2	NIPA2	non imprinted in Prader-Willi/Angelman syndrome 2	4.84705e-13	5.08746e-09	1.0685
GO:0006810	transport	SCFD2	SCFD2	sec1 family domain containing 2	4.84705e-13	5.08746e-09	1.0685
GO:0006810	transport	ABCB11	ABCB11	ATP-binding cassette, sub-family B (MDR/TAP), member 11	4.84705e-13	5.08746e-09	1.0685
GO:0006810	transport	CHMP2A	CHMP2A	charged multivesicular body protein 2A	4.84705e-13	5.08746e-09	1.0685
GO:0006810	transport	AP1S3	AP1S3	adaptor-related protein complex 1, sigma 3 subunit	4.84705e-13	5.08746e-09	1.0685
GO:0006810	transport	NACA	NACA	nascent polypeptide-associated complex alpha subunit	4.84705e-13	5.08746e-09	1.0685
GO:0006810	transport	NUP98	NUP98	nucleoporin 98kDa	4.84705e-13	5.08746e-09	1.0685
GO:0006810	transport	LIN7B	LIN7B	lin-7 homolog B (C. elegans)	4.84705e-13	5.08746e-09	1.0685
GO:0006810	transport	ERGIC1	ERGIC1	endoplasmic reticulum-golgi intermediate compartment (ERGIC) 1	4.84705e-13	5.08746e-09	1.0685
GO:0006810	transport	THOC7	THOC7	THO complex 7 homolog (Drosophila)	4.84705e-13	5.08746e-09	1.0685
GO:0006810	transport	RBP2	RBP2	retinol binding protein 2, cellular	4.84705e-13	5.08746e-09	1.0685
GO:0006810	transport	SLC9B2	SLC9B2	solute carrier family 9, subfamily B (NHA2, cation proton antiporter 2), member 2	4.84705e-13	5.08746e-09	1.0685
GO:0006810	transport	SLC5A5	SLC5A5	solute carrier family 5 (sodium/iodide cotransporter), member 5	4.84705e-13	5.08746e-09	1.0685
GO:0006810	transport	S100A13	S100A13	S100 calcium binding protein A13	4.84705e-13	5.08746e-09	1.0685
GO:0006810	transport	RABIF	RABIF	RAB interacting factor	4.84705e-13	5.08746e-09	1.0685
GO:0006810	transport	PEX13	PEX13	peroxisomal biogenesis factor 13	4.84705e-13	5.08746e-09	1.0685
GO:0006810	transport	AC138230.1	ANO9	anoctamin 9	4.84705e-13	5.08746e-09	1.0685
GO:0006810	transport	SERP1	SERP1	stress-associated endoplasmic reticulum protein 1	4.84705e-13	5.08746e-09	1.0685
GO:0006810	transport	SNX21	SNX21	sorting nexin family member 21	4.84705e-13	5.08746e-09	1.0685
GO:0006810	transport	ACBD3	ACBD3	acyl-CoA binding domain containing 3	4.84705e-13	5.08746e-09	1.0685
GO:0006810	transport	AP006216.2	APOA4	apolipoprotein A-IV	4.84705e-13	5.08746e-09	1.0685
GO:0006810	transport	ABCD1	ABCD1	ATP-binding cassette, sub-family D (ALD), member 1	4.84705e-13	5.08746e-09	1.0685
GO:0006810	transport	AC096734.1	ATP8A1	ATPase, aminophospholipid transporter (APLT), class I, type 8A, member 1	4.84705e-13	5.08746e-09	1.0685
GO:0006810	transport	AL049542.1	RAB11FIP3	RAB11 family interacting protein 3 (class II)	4.84705e-13	5.08746e-09	1.0685
GO:0006810	transport	AC093591.3	SLC25A31	solute carrier family 25 (mitochondrial carrier; adenine nucleotide translocator), member 31	4.84705e-13	5.08746e-09	1.0685
GO:0006810	transport	KPNA7	KPNA7	karyopherin alpha 7 (importin alpha 8)	4.84705e-13	5.08746e-09	1.0685
GO:0006810	transport	APPBP2	APPBP2	amyloid beta precursor protein (cytoplasmic tail) binding protein 2	4.84705e-13	5.08746e-09	1.0685
GO:0006810	transport	SLC16A1	SLC16A1	solute carrier family 16 (monocarboxylate transporter), member 1	4.84705e-13	5.08746e-09	1.0685
GO:0006810	transport	GJB1	GJB1	gap junction protein, beta 1, 32kDa	4.84705e-13	5.08746e-09	1.0685
GO:0006810	transport	ARHGAP33	ARHGAP33	Rho GTPase activating protein 33	4.84705e-13	5.08746e-09	1.0685
GO:0006810	transport	SLC17A7	SLC17A7	solute carrier family 17 (vesicular glutamate transporter), member 7	4.84705e-13	5.08746e-09	1.0685
GO:0006810	transport	NUP188	NUP188	nucleoporin 188kDa	4.84705e-13	5.08746e-09	1.0685
GO:0006810	transport	SLC25A10	SLC25A10	solute carrier family 25 (mitochondrial carrier; dicarboxylate transporter), member 10	4.84705e-13	5.08746e-09	1.0685
GO:0006810	transport	CETP	CETP	cholesteryl ester transfer protein, plasma	4.84705e-13	5.08746e-09	1.0685
GO:0006810	transport	ABCC4	ABCC4	ATP-binding cassette, sub-family C (CFTR/MRP), member 4	4.84705e-13	5.08746e-09	1.0685
GO:0006810	transport	GLRB	GLRB	glycine receptor, beta	4.84705e-13	5.08746e-09	1.0685
GO:0006810	transport	RAB9A	RAB9A	RAB9A, member RAS oncogene family	4.84705e-13	5.08746e-09	1.0685
GO:0006810	transport	SLC38A10	SLC38A10	solute carrier family 38, member 10	4.84705e-13	5.08746e-09	1.0685
GO:0006810	transport	ATP4B	ATP4B	ATPase, H+/K+ exchanging, beta polypeptide	4.84705e-13	5.08746e-09	1.0685
GO:0006810	transport	ABCB4	ABCB4	ATP-binding cassette, sub-family B (MDR/TAP), member 4	4.84705e-13	5.08746e-09	1.0685
GO:0006810	transport	ANKRD50	ANKRD50	ankyrin repeat domain 50	4.84705e-13	5.08746e-09	1.0685
GO:0006810	transport	SYTL2	SYTL2	synaptotagmin-like 2	4.84705e-13	5.08746e-09	1.0685
GO:0006810	transport	NUTF2	NUTF2	nuclear transport factor 2	4.84705e-13	5.08746e-09	1.0685
GO:0006810	transport	VPS41	VPS41	vacuolar protein sorting 41 homolog (S. cerevisiae)	4.84705e-13	5.08746e-09	1.0685
GO:0006810	transport	PAFAH1B1	PAFAH1B1	platelet-activating factor acetylhydrolase 1b, regulatory subunit 1 (45kDa)	4.84705e-13	5.08746e-09	1.0685
GO:0006810	transport	ABCG4	ABCG4	ATP-binding cassette, sub-family G (WHITE), member 4	4.84705e-13	5.08746e-09	1.0685
GO:0006810	transport	SLC6A9	SLC6A9	solute carrier family 6 (neurotransmitter transporter, glycine), member 9	4.84705e-13	5.08746e-09	1.0685
GO:0006810	transport	AC004540.2	SNX10	sorting nexin 10	4.84705e-13	5.08746e-09	1.0685
GO:0006810	transport	YIF1A	YIF1A	Yip1 interacting factor homolog A (S. cerevisiae)	4.84705e-13	5.08746e-09	1.0685
GO:0006810	transport	AC004888.1	KCND2	potassium voltage-gated channel, Shal-related subfamily, member 2	4.84705e-13	5.08746e-09	1.0685
GO:0006810	transport	MFSD2B	MFSD2B	major facilitator superfamily domain containing 2B	4.84705e-13	5.08746e-09	1.0685
GO:0006810	transport	DYNLRB1	DYNLRB1	dynein, light chain, roadblock-type 1	4.84705e-13	5.08746e-09	1.0685
GO:0006810	transport	NDEL1	NDEL1	nudE neurodevelopment protein 1-like 1	4.84705e-13	5.08746e-09	1.0685
GO:0006810	transport	GLRA3	GLRA3	glycine receptor, alpha 3	4.84705e-13	5.08746e-09	1.0685
GO:0006810	transport	KCNN4	KCNN4	potassium intermediate/small conductance calcium-activated channel, subfamily N, member 4	4.84705e-13	5.08746e-09	1.0685
GO:0006810	transport	GLTP	GLTP	glycolipid transfer protein	4.84705e-13	5.08746e-09	1.0685
GO:0006810	transport	NAPA	NAPA	N-ethylmaleimide-sensitive factor attachment protein, alpha	4.84705e-13	5.08746e-09	1.0685
GO:0006810	transport	AP1AR	AP1AR	adaptor-related protein complex 1 associated regulatory protein	4.84705e-13	5.08746e-09	1.0685
GO:0006810	transport	SV2A	SV2A	synaptic vesicle glycoprotein 2A	4.84705e-13	5.08746e-09	1.0685
GO:0006810	transport	SYT5	SYT5	synaptotagmin V	4.84705e-13	5.08746e-09	1.0685
GO:0006810	transport	AC026356.1	BICD1	bicaudal D homolog 1 (Drosophila)	4.84705e-13	5.08746e-09	1.0685
GO:0006810	transport	AC234781.4	CLIC2	chloride intracellular channel 2	4.84705e-13	5.08746e-09	1.0685
GO:0006810	transport	HTR3D	HTR3D	5-hydroxytryptamine (serotonin) receptor 3D, ionotropic	4.84705e-13	5.08746e-09	1.0685
GO:0006810	transport	MFSD3	MFSD3	major facilitator superfamily domain containing 3	4.84705e-13	5.08746e-09	1.0685
GO:0006810	transport	AC105910.1	SLC39A14	solute carrier family 39 (zinc transporter), member 14	4.84705e-13	5.08746e-09	1.0685
GO:0006810	transport	KDELR3	KDELR3	KDEL (Lys-Asp-Glu-Leu) endoplasmic reticulum protein retention receptor 3	4.84705e-13	5.08746e-09	1.0685
GO:0006810	transport	AC112504.2	ATP1B3	ATPase, Na+/K+ transporting, beta 3 polypeptide	4.84705e-13	5.08746e-09	1.0685
GO:0006810	transport	CACNB1	CACNB1	calcium channel, voltage-dependent, beta 1 subunit	4.84705e-13	5.08746e-09	1.0685
GO:0006810	transport	DYNLL1	DYNLL1	dynein, light chain, LC8-type 1	4.84705e-13	5.08746e-09	1.0685
GO:0006810	transport	TMEM106B	TMEM106B	transmembrane protein 106B	4.84705e-13	5.08746e-09	1.0685
GO:0006810	transport	SLC35D2	SLC35D2	solute carrier family 35 (UDP-GlcNAc/UDP-glucose transporter), member D2	4.84705e-13	5.08746e-09	1.0685
GO:0006810	transport	CATSPER4	CATSPER4	cation channel, sperm associated 4	4.84705e-13	5.08746e-09	1.0685
GO:0006810	transport	AC011363.1	ATP10B	ATPase, class V, type 10B	4.84705e-13	5.08746e-09	1.0685
GO:0006810	transport	AP002993.1	RAB6A	RAB6A, member RAS oncogene family	4.84705e-13	5.08746e-09	1.0685
GO:0006810	transport	AC104316.2	DERL1	derlin 1	4.84705e-13	5.08746e-09	1.0685
GO:0006810	transport	BNIP1	BNIP1	BCL2/adenovirus E1B 19kDa interacting protein 1	4.84705e-13	5.08746e-09	1.0685
GO:0006810	transport	SLC17A4	SLC17A4	solute carrier family 17, member 4	4.84705e-13	5.08746e-09	1.0685
GO:0006810	transport	ARL4C	ARL4C	ADP-ribosylation factor-like 4C	4.84705e-13	5.08746e-09	1.0685
GO:0006810	transport	SLC25A47	SLC25A47	solute carrier family 25, member 47	4.84705e-13	5.08746e-09	1.0685
GO:0006810	transport	RACGAP1	RACGAP1	Rac GTPase activating protein 1	4.84705e-13	5.08746e-09	1.0685
GO:0006810	transport	SEC62	SEC62	SEC62 homolog (S. cerevisiae)	4.84705e-13	5.08746e-09	1.0685
GO:0006810	transport	CLIC1	CLIC1	chloride intracellular channel 1	4.84705e-13	5.08746e-09	1.0685
GO:0006810	transport	RAB25	RAB25	RAB25, member RAS oncogene family	4.84705e-13	5.08746e-09	1.0685
GO:0006810	transport	SRSF7	SRSF7	serine/arginine-rich splicing factor 7	4.84705e-13	5.08746e-09	1.0685
GO:0006810	transport	ATP1B2	ATP1B2	ATPase, Na+/K+ transporting, beta 2 polypeptide	4.84705e-13	5.08746e-09	1.0685
GO:0006810	transport	SLC25A18	SLC25A18	solute carrier family 25 (glutamate carrier), member 18	4.84705e-13	5.08746e-09	1.0685
GO:0006810	transport	ADAMTS9	ADAMTS9	ADAM metallopeptidase with thrombospondin type 1 motif, 9	4.84705e-13	5.08746e-09	1.0685
GO:0006810	transport	TRPM5	TRPM5	transient receptor potential cation channel, subfamily M, member 5	4.84705e-13	5.08746e-09	1.0685
GO:0006810	transport	SLC8B1	SLC8B1	solute carrier family 8 (sodium/lithium/calcium exchanger), member B1	4.84705e-13	5.08746e-09	1.0685
GO:0006810	transport	ABCA7	ABCA7	ATP-binding cassette, sub-family A (ABC1), member 7	4.84705e-13	5.08746e-09	1.0685
GO:0006810	transport	RAB39B	RAB39B	RAB39B, member RAS oncogene family	4.84705e-13	5.08746e-09	1.0685
GO:0006810	transport	PLTP	PLTP	phospholipid transfer protein	4.84705e-13	5.08746e-09	1.0685
GO:0006810	transport	TPCN1	TPCN1	two pore segment channel 1	4.84705e-13	5.08746e-09	1.0685
GO:0006810	transport	AL807752.4	ABCA2	ATP-binding cassette, sub-family A (ABC1), member 2	4.84705e-13	5.08746e-09	1.0685
GO:0006810	transport	LPA	LPA	lipoprotein, Lp(a)	4.84705e-13	5.08746e-09	1.0685
GO:0006810	transport	ATP2A2	ATP2A2	ATPase, Ca++ transporting, cardiac muscle, slow twitch 2	4.84705e-13	5.08746e-09	1.0685
GO:0006810	transport	SLC9C1	SLC9C1	solute carrier family 9, subfamily C (Na+-transporting carboxylic acid decarboxylase), member 1	4.84705e-13	5.08746e-09	1.0685
GO:0006810	transport	CEP131	CEP131	centrosomal protein 131kDa	4.84705e-13	5.08746e-09	1.0685
GO:0006810	transport	SCFD1	SCFD1	sec1 family domain containing 1	4.84705e-13	5.08746e-09	1.0685
GO:0006810	transport	COPB1	COPB1	coatomer protein complex, subunit beta 1	4.84705e-13	5.08746e-09	1.0685
GO:0006810	transport	SLC16A2	SLC16A2	solute carrier family 16, member 2 (thyroid hormone transporter)	4.84705e-13	5.08746e-09	1.0685
GO:0006810	transport	AC008440.3	CACNG8	calcium channel, voltage-dependent, gamma subunit 8	4.84705e-13	5.08746e-09	1.0685
GO:0006810	transport	SLC25A29	SLC25A29	solute carrier family 25 (mitochondrial carnitine/acylcarnitine carrier), member 29	4.84705e-13	5.08746e-09	1.0685
GO:0006810	transport	STEAP4	STEAP4	STEAP family member 4	4.84705e-13	5.08746e-09	1.0685
GO:0006810	transport	DUOXA2	DUOXA2	dual oxidase maturation factor 2	4.84705e-13	5.08746e-09	1.0685
GO:0006810	transport	SLC4A7	SLC4A7	solute carrier family 4, sodium bicarbonate cotransporter, member 7	4.84705e-13	5.08746e-09	1.0685
GO:0006810	transport	SLC13A1	SLC13A1	solute carrier family 13 (sodium/sulfate symporter), member 1	4.84705e-13	5.08746e-09	1.0685
GO:0006810	transport	SLC10A5	SLC10A5	solute carrier family 10, member 5	4.84705e-13	5.08746e-09	1.0685
GO:0006810	transport	CLCN5	CLCN5	chloride channel, voltage-sensitive 5	4.84705e-13	5.08746e-09	1.0685
GO:0006810	transport	AL138960.1	SERP2	stress-associated endoplasmic reticulum protein family member 2	4.84705e-13	5.08746e-09	1.0685
GO:0006810	transport	AC233702.5	KCNJ18	potassium inwardly-rectifying channel, subfamily J, member 18	4.84705e-13	5.08746e-09	1.0685
GO:0006810	transport	DNAJC14	DNAJC14	DnaJ (Hsp40) homolog, subfamily C, member 14	4.84705e-13	5.08746e-09	1.0685
GO:0006810	transport	PITPNB	PITPNB	phosphatidylinositol transfer protein, beta	4.84705e-13	5.08746e-09	1.0685
GO:0006810	transport	KCNE4	KCNE4	potassium voltage-gated channel, Isk-related family, member 4	4.84705e-13	5.08746e-09	1.0685
GO:0006810	transport	RIMS3	RIMS3	regulating synaptic membrane exocytosis 3	4.84705e-13	5.08746e-09	1.0685
GO:0006810	transport	AC107421.1	SLC9A9	solute carrier family 9, subfamily A (NHE9, cation proton antiporter 9), member 9	4.84705e-13	5.08746e-09	1.0685
GO:0006810	transport	AC064834.1	SLC39A10	solute carrier family 39 (zinc transporter), member 10	4.84705e-13	5.08746e-09	1.0685
GO:0006810	transport	SLC12A7	SLC12A7	solute carrier family 12 (potassium/chloride transporter), member 7	4.84705e-13	5.08746e-09	1.0685
GO:0006810	transport	USO1	USO1	USO1 vesicle transport factor	4.84705e-13	5.08746e-09	1.0685
GO:0006810	transport	AC053513.1	C2CD5	C2 calcium-dependent domain containing 5	4.84705e-13	5.08746e-09	1.0685
GO:0006810	transport	AC013429.1	SVOPL	SVOP-like	4.84705e-13	5.08746e-09	1.0685
GO:0006810	transport	GGA1	GGA1	golgi-associated, gamma adaptin ear containing, ARF binding protein 1	4.84705e-13	5.08746e-09	1.0685
GO:0006810	transport	TIMM8A	TIMM8A	translocase of inner mitochondrial membrane 8 homolog A (yeast)	4.84705e-13	5.08746e-09	1.0685
GO:0006810	transport	AKT1	AKT1	v-akt murine thymoma viral oncogene homolog 1	4.84705e-13	5.08746e-09	1.0685
GO:0006810	transport	FLVCR2	FLVCR2	feline leukemia virus subgroup C cellular receptor family, member 2	4.84705e-13	5.08746e-09	1.0685
GO:0006810	transport	SLCO1B3	SLCO1B3	solute carrier organic anion transporter family, member 1B3	4.84705e-13	5.08746e-09	1.0685
GO:0006810	transport	RBSN	RBSN	zinc finger, FYVE domain containing 20	4.84705e-13	5.08746e-09	1.0685
GO:0006810	transport	FXYD5	FXYD5	FXYD domain containing ion transport regulator 5	4.84705e-13	5.08746e-09	1.0685
GO:0006810	transport	GOLIM4	GOLIM4	golgi integral membrane protein 4	4.84705e-13	5.08746e-09	1.0685
GO:0006810	transport	PKDCC	PKDCC	protein kinase domain containing, cytoplasmic	4.84705e-13	5.08746e-09	1.0685
GO:0006810	transport	AC012486.1	PGAP1	post-GPI attachment to proteins 1	4.84705e-13	5.08746e-09	1.0685
GO:0006810	transport	IWS1	IWS1	IWS1 homolog (S. cerevisiae)	4.84705e-13	5.08746e-09	1.0685
GO:0006810	transport	CLIC3	CLIC3	chloride intracellular channel 3	4.84705e-13	5.08746e-09	1.0685
GO:0006810	transport	DAB2	DAB2	Dab, mitogen-responsive phosphoprotein, homolog 2 (Drosophila)	4.84705e-13	5.08746e-09	1.0685
GO:0006810	transport	SLC38A1	SLC38A1	solute carrier family 38, member 1	4.84705e-13	5.08746e-09	1.0685
GO:0006810	transport	ITPR2	ITPR2	inositol 1,4,5-trisphosphate receptor, type 2	4.84705e-13	5.08746e-09	1.0685
GO:0006810	transport	CNNM3	CNNM3	cyclin and CBS domain divalent metal cation transport mediator 3	4.84705e-13	5.08746e-09	1.0685
GO:0006810	transport	SLC23A2	SLC23A2	solute carrier family 23 (ascorbic acid transporter), member 2	4.84705e-13	5.08746e-09	1.0685
GO:0006810	transport	AKTIP	AKTIP	AKT interacting protein	4.84705e-13	5.08746e-09	1.0685
GO:0006810	transport	SLC5A4	SLC5A4	solute carrier family 5 (glucose activated ion channel), member 4	4.84705e-13	5.08746e-09	1.0685
GO:0006810	transport	SLC25A51	SLC25A51	solute carrier family 25, member 51	4.84705e-13	5.08746e-09	1.0685
GO:0006810	transport	SEH1L	SEH1L	SEH1-like (S. cerevisiae)	4.84705e-13	5.08746e-09	1.0685
GO:0006810	transport	AC027228.1	CHRNA3	cholinergic receptor, nicotinic, alpha 3 (neuronal)	4.84705e-13	5.08746e-09	1.0685
GO:0006810	transport	AC099677.1	SCP2	sterol carrier protein 2	4.84705e-13	5.08746e-09	1.0685
GO:0006810	transport	RBP3	RBP3	retinol binding protein 3, interstitial	4.84705e-13	5.08746e-09	1.0685
GO:0006810	transport	PKD2L2	PKD2L2	polycystic kidney disease 2-like 2	4.84705e-13	5.08746e-09	1.0685
GO:0006810	transport	SLC36A4	SLC36A4	solute carrier family 36 (proton/amino acid symporter), member 4	4.84705e-13	5.08746e-09	1.0685
GO:0006810	transport	CEP290	CEP290	centrosomal protein 290kDa	4.84705e-13	5.08746e-09	1.0685
GO:0006810	transport	ORAI1	ORAI1	ORAI calcium release-activated calcium modulator 1	4.84705e-13	5.08746e-09	1.0685
GO:0006810	transport	TTPA	TTPA	tocopherol (alpha) transfer protein	4.84705e-13	5.08746e-09	1.0685
GO:0006810	transport	AC005237.2	ANO7	anoctamin 7	4.84705e-13	5.08746e-09	1.0685
GO:0006810	transport	SLC7A9	SLC7A9	solute carrier family 7 (amino acid transporter light chain, bo,+ system), member 9	4.84705e-13	5.08746e-09	1.0685
GO:0006810	transport	GGA2	GGA2	golgi-associated, gamma adaptin ear containing, ARF binding protein 2	4.84705e-13	5.08746e-09	1.0685
GO:0006810	transport	AC083875.1	EXOC4	exocyst complex component 4	4.84705e-13	5.08746e-09	1.0685
GO:0006810	transport	CUBN	CUBN	cubilin (intrinsic factor-cobalamin receptor)	4.84705e-13	5.08746e-09	1.0685
GO:0006810	transport	TMEM63C	TMEM63C	transmembrane protein 63C	4.84705e-13	5.08746e-09	1.0685
GO:0006810	transport	SNX1	SNX1	sorting nexin 1	4.84705e-13	5.08746e-09	1.0685
GO:0006810	transport	SLC30A6	SLC30A6	solute carrier family 30 (zinc transporter), member 6	4.84705e-13	5.08746e-09	1.0685
GO:0006810	transport	ARRB1	ARRB1	arrestin, beta 1	4.84705e-13	5.08746e-09	1.0685
GO:0006810	transport	AC022144.1	ACTN4	actinin, alpha 4	4.84705e-13	5.08746e-09	1.0685
GO:0006810	transport	MCUR1	MCUR1	mitochondrial calcium uniporter regulator 1	4.84705e-13	5.08746e-09	1.0685
GO:0006810	transport	IGF2R	IGF2R	insulin-like growth factor 2 receptor	4.84705e-13	5.08746e-09	1.0685
GO:0006810	transport	LASP1	LASP1	LIM and SH3 protein 1	4.84705e-13	5.08746e-09	1.0685
GO:0006810	transport	RHBG	RHBG	Rh family, B glycoprotein (gene/pseudogene)	4.84705e-13	5.08746e-09	1.0685
GO:0006810	transport	SCAMP2	SCAMP2	secretory carrier membrane protein 2	4.84705e-13	5.08746e-09	1.0685
GO:0006810	transport	MTX2	MTX2	metaxin 2	4.84705e-13	5.08746e-09	1.0685
GO:0006810	transport	TESC	TESC	tescalcin	4.84705e-13	5.08746e-09	1.0685
GO:0006810	transport	AC244033.2	VPS45	vacuolar protein sorting 45 homolog (S. cerevisiae)	4.84705e-13	5.08746e-09	1.0685
GO:0006810	transport	LYVE1	LYVE1	lymphatic vessel endothelial hyaluronan receptor 1	4.84705e-13	5.08746e-09	1.0685
GO:0006810	transport	LDLRAP1	LDLRAP1	low density lipoprotein receptor adaptor protein 1	4.84705e-13	5.08746e-09	1.0685
GO:0006810	transport	AC005086.1	CUX1	cut-like homeobox 1	4.84705e-13	5.08746e-09	1.0685
GO:0006810	transport	SPIRE2	SPIRE2	spire-type actin nucleation factor 2	4.84705e-13	5.08746e-09	1.0685
GO:0006810	transport	SLC22A31	SLC22A31	solute carrier family 22, member 31	4.84705e-13	5.08746e-09	1.0685
GO:0006810	transport	AC079953.1	SLC5A8	solute carrier family 5 (sodium/monocarboxylate cotransporter), member 8	4.84705e-13	5.08746e-09	1.0685
GO:0006810	transport	TMEM9	TMEM9	transmembrane protein 9	4.84705e-13	5.08746e-09	1.0685
GO:0006810	transport	FABP7	FABP7	fatty acid binding protein 7, brain	4.84705e-13	5.08746e-09	1.0685
GO:0006810	transport	SLC6A5	SLC6A5	solute carrier family 6 (neurotransmitter transporter), member 5	4.84705e-13	5.08746e-09	1.0685
GO:0006810	transport	PLEKHA8	PLEKHA8	pleckstrin homology domain containing, family A (phosphoinositide binding specific) member 8	4.84705e-13	5.08746e-09	1.0685
GO:0006810	transport	HCN4	HCN4	hyperpolarization activated cyclic nucleotide-gated potassium channel 4	4.84705e-13	5.08746e-09	1.0685
GO:0006810	transport	SLC32A1	SLC32A1	solute carrier family 32 (GABA vesicular transporter), member 1	4.84705e-13	5.08746e-09	1.0685
GO:0006810	transport	AC027097.1	ATP8B1	ATPase, aminophospholipid transporter, class I, type 8B, member 1	4.84705e-13	5.08746e-09	1.0685
GO:0006810	transport	PEX1	PEX1	peroxisomal biogenesis factor 1	4.84705e-13	5.08746e-09	1.0685
GO:0006810	transport	ATG4D	ATG4D	autophagy related 4D, cysteine peptidase	4.84705e-13	5.08746e-09	1.0685
GO:0006810	transport	STX17	STX17	syntaxin 17	4.84705e-13	5.08746e-09	1.0685
GO:0006810	transport	GABRA4	GABRA4	gamma-aminobutyric acid (GABA) A receptor, alpha 4	4.84705e-13	5.08746e-09	1.0685
GO:0006810	transport	NACAD	NACAD	NAC alpha domain containing	4.84705e-13	5.08746e-09	1.0685
GO:0006810	transport	SLC22A5	SLC22A5	solute carrier family 22 (organic cation/carnitine transporter), member 5	4.84705e-13	5.08746e-09	1.0685
GO:0006810	transport	CACNB4	CACNB4	calcium channel, voltage-dependent, beta 4 subunit	4.84705e-13	5.08746e-09	1.0685
GO:0006810	transport	SCG5	SCG5	secretogranin V (7B2 protein)	4.84705e-13	5.08746e-09	1.0685
GO:0006810	transport	TIMM17A	TIMM17A	translocase of inner mitochondrial membrane 17 homolog A (yeast)	4.84705e-13	5.08746e-09	1.0685
GO:0006810	transport	TTR	TTR	transthyretin	4.84705e-13	5.08746e-09	1.0685
GO:0006810	transport	AP1M2	AP1M2	adaptor-related protein complex 1, mu 2 subunit	4.84705e-13	5.08746e-09	1.0685
GO:0006810	transport	AC018462.1	COMMD1	copper metabolism (Murr1) domain containing 1	4.84705e-13	5.08746e-09	1.0685
GO:0006810	transport	TAP2	TAP2	transporter 2, ATP-binding cassette, sub-family B (MDR/TAP)	4.84705e-13	5.08746e-09	1.0685
GO:0006810	transport	AC061961.1	KCNJ3	potassium inwardly-rectifying channel, subfamily J, member 3	4.84705e-13	5.08746e-09	1.0685
GO:0006810	transport	ATP6V1B2	ATP6V1B2	ATPase, H+ transporting, lysosomal 56/58kDa, V1 subunit B2	4.84705e-13	5.08746e-09	1.0685
GO:0006810	transport	AC020907.1	FXYD3	FXYD domain containing ion transport regulator 3	4.84705e-13	5.08746e-09	1.0685
GO:0006810	transport	AC015983.2	CADPS2	Ca++-dependent secretion activator 2	4.84705e-13	5.08746e-09	1.0685
GO:0006810	transport	CHCHD4	CHCHD4	coiled-coil-helix-coiled-coil-helix domain containing 4	4.84705e-13	5.08746e-09	1.0685
GO:0006810	transport	UBAP1	UBAP1	ubiquitin associated protein 1	4.84705e-13	5.08746e-09	1.0685
GO:0006810	transport	AC137627.1	ANO2	anoctamin 2, calcium activated chloride channel	4.84705e-13	5.08746e-09	1.0685
GO:0006810	transport	LIN7A	LIN7A	lin-7 homolog A (C. elegans)	4.84705e-13	5.08746e-09	1.0685
GO:0006810	transport	SLC18A2	SLC18A2	solute carrier family 18 (vesicular monoamine transporter), member 2	4.84705e-13	5.08746e-09	1.0685
GO:0006810	transport	PITPNM1	PITPNM1	phosphatidylinositol transfer protein, membrane-associated 1	4.84705e-13	5.08746e-09	1.0685
GO:0006810	transport	APBA2	APBA2	amyloid beta (A4) precursor protein-binding, family A, member 2	4.84705e-13	5.08746e-09	1.0685
GO:0006810	transport	OCA2	OCA2	oculocutaneous albinism II	4.84705e-13	5.08746e-09	1.0685
GO:0006810	transport	TRAPPC2B	TRAPPC2B	trafficking protein particle complex 2B	4.84705e-13	5.08746e-09	1.0685
GO:0006810	transport	SLC19A3	SLC19A3	solute carrier family 19 (thiamine transporter), member 3	4.84705e-13	5.08746e-09	1.0685
GO:0006810	transport	SLC13A3	SLC13A3	solute carrier family 13 (sodium-dependent dicarboxylate transporter), member 3	4.84705e-13	5.08746e-09	1.0685
GO:0006810	transport	COMMD9	COMMD9	COMM domain containing 9	4.84705e-13	5.08746e-09	1.0685
GO:0006810	transport	SLC38A7	SLC38A7	solute carrier family 38, member 7	4.84705e-13	5.08746e-09	1.0685
GO:0006810	transport	ERGIC2	ERGIC2	ERGIC and golgi 2	4.84705e-13	5.08746e-09	1.0685
GO:0006810	transport	SLC39A3	SLC39A3	solute carrier family 39 (zinc transporter), member 3	4.84705e-13	5.08746e-09	1.0685
GO:0006810	transport	ARF6	ARF6	ADP-ribosylation factor 6	4.84705e-13	5.08746e-09	1.0685
GO:0006810	transport	APOA5	APOA5	apolipoprotein A-V	4.84705e-13	5.08746e-09	1.0685
GO:0006810	transport	KCNIP2	KCNIP2	Kv channel interacting protein 2	4.84705e-13	5.08746e-09	1.0685
GO:0006810	transport	STARD5	STARD5	StAR-related lipid transfer (START) domain containing 5	4.84705e-13	5.08746e-09	1.0685
GO:0006810	transport	AAAS	AAAS	achalasia, adrenocortical insufficiency, alacrimia	4.84705e-13	5.08746e-09	1.0685
GO:0006810	transport	ABCA5	ABCA5	ATP-binding cassette, sub-family A (ABC1), member 5	4.84705e-13	5.08746e-09	1.0685
GO:0006810	transport	DOC2A	DOC2A	double C2-like domains, alpha	4.84705e-13	5.08746e-09	1.0685
GO:0006810	transport	SEC14L2	SEC14L2	SEC14-like 2 (S. cerevisiae)	4.84705e-13	5.08746e-09	1.0685
GO:0006810	transport	CACNA1I	CACNA1I	calcium channel, voltage-dependent, T type, alpha 1I subunit	4.84705e-13	5.08746e-09	1.0685
GO:0006810	transport	SCN4A	SCN4A	sodium channel, voltage-gated, type IV, alpha subunit	4.84705e-13	5.08746e-09	1.0685
GO:0006810	transport	STXBP5	STXBP5	syntaxin binding protein 5 (tomosyn)	4.84705e-13	5.08746e-09	1.0685
GO:0006810	transport	CHRNA10	CHRNA10	cholinergic receptor, nicotinic, alpha 10 (neuronal)	4.84705e-13	5.08746e-09	1.0685
GO:0006810	transport	SYPL1	SYPL1	synaptophysin-like 1	4.84705e-13	5.08746e-09	1.0685
GO:0006810	transport	AC004839.1	BCAP29	B-cell receptor-associated protein 29	4.84705e-13	5.08746e-09	1.0685
GO:0006810	transport	SPNS3	SPNS3	spinster homolog 3 (Drosophila)	4.84705e-13	5.08746e-09	1.0685
GO:0006810	transport	AC026185.1	ATG7	autophagy related 7	4.84705e-13	5.08746e-09	1.0685
GO:0006810	transport	RAB3C	RAB3C	RAB3C, member RAS oncogene family	4.84705e-13	5.08746e-09	1.0685
GO:0006810	transport	SLC22A15	SLC22A15	solute carrier family 22, member 15	4.84705e-13	5.08746e-09	1.0685
GO:0006810	transport	KCNK6	KCNK6	potassium channel, subfamily K, member 6	4.84705e-13	5.08746e-09	1.0685
GO:0006810	transport	CPLX3	CPLX3	complexin 3	4.84705e-13	5.08746e-09	1.0685
GO:0006810	transport	FABP4	FABP4	fatty acid binding protein 4, adipocyte	4.84705e-13	5.08746e-09	1.0685
GO:0006810	transport	OSBP	OSBP	oxysterol binding protein	4.84705e-13	5.08746e-09	1.0685
GO:0006810	transport	TIMM44	TIMM44	translocase of inner mitochondrial membrane 44 homolog (yeast)	4.84705e-13	5.08746e-09	1.0685
GO:0006810	transport	SLC26A3	SLC26A3	solute carrier family 26 (anion exchanger), member 3	4.84705e-13	5.08746e-09	1.0685
GO:0006810	transport	AC069213.2	APOD	apolipoprotein D	4.84705e-13	5.08746e-09	1.0685
GO:0006810	transport	NUP160	NUP160	nucleoporin 160kDa	4.84705e-13	5.08746e-09	1.0685
GO:0006810	transport	SLC7A14	SLC7A14	solute carrier family 7, member 14	4.84705e-13	5.08746e-09	1.0685
GO:0006810	transport	ESYT2	ESYT2	extended synaptotagmin-like protein 2	4.84705e-13	5.08746e-09	1.0685
GO:0006810	transport	XPO7	XPO7	exportin 7	4.84705e-13	5.08746e-09	1.0685
GO:0006810	transport	SLC4A9	SLC4A9	solute carrier family 4, sodium bicarbonate cotransporter, member 9	4.84705e-13	5.08746e-09	1.0685
GO:0006810	transport	ATG4B	ATG4B	autophagy related 4B, cysteine peptidase	4.84705e-13	5.08746e-09	1.0685
GO:0006810	transport	SLC4A3	SLC4A3	solute carrier family 4 (anion exchanger), member 3	4.84705e-13	5.08746e-09	1.0685
GO:0006810	transport	RAB4A	RAB4A	RAB4A, member RAS oncogene family	4.84705e-13	5.08746e-09	1.0685
GO:0006810	transport	AC002486.2	ABCB5	ATP-binding cassette, sub-family B (MDR/TAP), member 5	4.84705e-13	5.08746e-09	1.0685
GO:0006810	transport	SLC24A4	SLC24A4	solute carrier family 24 (sodium/potassium/calcium exchanger), member 4	4.84705e-13	5.08746e-09	1.0685
GO:0006810	transport	HOOK1	HOOK1	hook microtubule-tethering protein 1	4.84705e-13	5.08746e-09	1.0685
GO:0006810	transport	AC008655.2	KCNC3	potassium voltage-gated channel, Shaw-related subfamily, member 3	4.84705e-13	5.08746e-09	1.0685
GO:0006810	transport	AC096632.1	KLHL12	kelch-like family member 12	4.84705e-13	5.08746e-09	1.0685
GO:0006810	transport	STX16	STX16	syntaxin 16	4.84705e-13	5.08746e-09	1.0685
GO:0006810	transport	CLCN1	CLCN1	chloride channel, voltage-sensitive 1	4.84705e-13	5.08746e-09	1.0685
GO:0006810	transport	AC104131.1	GULP1	GULP, engulfment adaptor PTB domain containing 1	4.84705e-13	5.08746e-09	1.0685
GO:0006810	transport	SLC7A10	SLC7A10	solute carrier family 7 (neutral amino acid transporter light chain, asc system), member 10	4.84705e-13	5.08746e-09	1.0685
GO:0006810	transport	SLC24A1	SLC24A1	solute carrier family 24 (sodium/potassium/calcium exchanger), member 1	4.84705e-13	5.08746e-09	1.0685
GO:0006810	transport	ATP2B1	ATP2B1	ATPase, Ca++ transporting, plasma membrane 1	4.84705e-13	5.08746e-09	1.0685
GO:0006810	transport	CPLX2	CPLX2	complexin 2	4.84705e-13	5.08746e-09	1.0685
GO:0006810	transport	SCAMP5	SCAMP5	secretory carrier membrane protein 5	4.84705e-13	5.08746e-09	1.0685
GO:0006810	transport	KCNJ8	KCNJ8	potassium inwardly-rectifying channel, subfamily J, member 8	4.84705e-13	5.08746e-09	1.0685
GO:0006810	transport	SLC17A1	SLC17A1	solute carrier family 17 (organic anion transporter), member 1	4.84705e-13	5.08746e-09	1.0685
GO:0006810	transport	SEC61B	SEC61B	Sec61 beta subunit	4.84705e-13	5.08746e-09	1.0685
GO:0006810	transport	KPNB1	KPNB1	karyopherin (importin) beta 1	4.84705e-13	5.08746e-09	1.0685
GO:0006810	transport	SLC26A6	SLC26A6	solute carrier family 26 (anion exchanger), member 6	4.84705e-13	5.08746e-09	1.0685
GO:0006810	transport	TRPV6	TRPV6	transient receptor potential cation channel, subfamily V, member 6	4.84705e-13	5.08746e-09	1.0685
GO:0006810	transport	KCNK2	KCNK2	potassium channel, subfamily K, member 2	4.84705e-13	5.08746e-09	1.0685
GO:0006810	transport	GRIN1	GRIN1	glutamate receptor, ionotropic, N-methyl D-aspartate 1	4.84705e-13	5.08746e-09	1.0685
GO:0006810	transport	MB	MB	myoglobin	4.84705e-13	5.08746e-09	1.0685
GO:0006810	transport	SCARA5	SCARA5	scavenger receptor class A, member 5	4.84705e-13	5.08746e-09	1.0685
GO:0006810	transport	TRPV2	TRPV2	transient receptor potential cation channel, subfamily V, member 2	4.84705e-13	5.08746e-09	1.0685
GO:0006810	transport	SLC6A15	SLC6A15	solute carrier family 6 (neutral amino acid transporter), member 15	4.84705e-13	5.08746e-09	1.0685
GO:0006810	transport	ERGIC3	ERGIC3	ERGIC and golgi 3	4.84705e-13	5.08746e-09	1.0685
GO:0006810	transport	SLC10A6	SLC10A6	solute carrier family 10 (sodium/bile acid cotransporter), member 6	4.84705e-13	5.08746e-09	1.0685
GO:0006810	transport	SLC8A2	SLC8A2	solute carrier family 8 (sodium/calcium exchanger), member 2	4.84705e-13	5.08746e-09	1.0685
GO:0006810	transport	SLC26A2	SLC26A2	solute carrier family 26 (anion exchanger), member 2	4.84705e-13	5.08746e-09	1.0685
GO:0006810	transport	SEC24A	SEC24A	SEC24 family member A	4.84705e-13	5.08746e-09	1.0685
GO:0006810	transport	KDELR2	KDELR2	KDEL (Lys-Asp-Glu-Leu) endoplasmic reticulum protein retention receptor 2	4.84705e-13	5.08746e-09	1.0685
GO:0006810	transport	AC092701.1	ZFAND6	zinc finger, AN1-type domain 6	4.84705e-13	5.08746e-09	1.0685
GO:0006810	transport	TMEM38B	TMEM38B	transmembrane protein 38B	4.84705e-13	5.08746e-09	1.0685
GO:0006810	transport	ABCD2	ABCD2	ATP-binding cassette, sub-family D (ALD), member 2	4.84705e-13	5.08746e-09	1.0685
GO:0006810	transport	SLC5A1	SLC5A1	solute carrier family 5 (sodium/glucose cotransporter), member 1	4.84705e-13	5.08746e-09	1.0685
GO:0006810	transport	OSBP2	OSBP2	oxysterol binding protein 2	4.84705e-13	5.08746e-09	1.0685
GO:0006810	transport	AC025263.1	BEST3	bestrophin 3	4.84705e-13	5.08746e-09	1.0685
GO:0006810	transport	AC016575.1	ANKH	ANKH inorganic pyrophosphate transport regulator	4.84705e-13	5.08746e-09	1.0685
GO:0006810	transport	APBA3	APBA3	amyloid beta (A4) precursor protein-binding, family A, member 3	4.84705e-13	5.08746e-09	1.0685
GO:0006810	transport	AQP11	AQP11	aquaporin 11	4.84705e-13	5.08746e-09	1.0685
GO:0006810	transport	SLC35A1	SLC35A1	solute carrier family 35 (CMP-sialic acid transporter), member A1	4.84705e-13	5.08746e-09	1.0685
GO:0006810	transport	CLDN16	CLDN16	claudin 16	4.84705e-13	5.08746e-09	1.0685
GO:0006810	transport	TPCN2	TPCN2	two pore segment channel 2	4.84705e-13	5.08746e-09	1.0685
GO:0006810	transport	ATP6V1E1	ATP6V1E1	ATPase, H+ transporting, lysosomal 31kDa, V1 subunit E1	4.84705e-13	5.08746e-09	1.0685
GO:0006810	transport	SLCO4C1	SLCO4C1	solute carrier organic anion transporter family, member 4C1	4.84705e-13	5.08746e-09	1.0685
GO:0006810	transport	SLC20A1	SLC20A1	solute carrier family 20 (phosphate transporter), member 1	4.84705e-13	5.08746e-09	1.0685
GO:0006810	transport	MCOLN3	MCOLN3	mucolipin 3	4.84705e-13	5.08746e-09	1.0685
GO:0006810	transport	FABP3	FABP3	fatty acid binding protein 3, muscle and heart (mammary-derived growth inhibitor)	4.84705e-13	5.08746e-09	1.0685
GO:0006810	transport	STX5	STX5	syntaxin 5	4.84705e-13	5.08746e-09	1.0685
GO:0006810	transport	KCNA10	KCNA10	potassium voltage-gated channel, shaker-related subfamily, member 10	4.84705e-13	5.08746e-09	1.0685
GO:0006810	transport	AC107031.1	SLC4A8	solute carrier family 4, sodium bicarbonate cotransporter, member 8	4.84705e-13	5.08746e-09	1.0685
GO:0006810	transport	UNC119	UNC119	unc-119 homolog (C. elegans)	4.84705e-13	5.08746e-09	1.0685
GO:0006810	transport	RAB12	RAB12	RAB12, member RAS oncogene family	4.84705e-13	5.08746e-09	1.0685
GO:0006810	transport	AL035633.1	RIMS1	regulating synaptic membrane exocytosis 1	4.84705e-13	5.08746e-09	1.0685
GO:0006810	transport	KCND1	KCND1	potassium voltage-gated channel, Shal-related subfamily, member 1	4.84705e-13	5.08746e-09	1.0685
GO:0006810	transport	VPS36	VPS36	vacuolar protein sorting 36 homolog (S. cerevisiae)	4.84705e-13	5.08746e-09	1.0685
GO:0006810	transport	CLCA2	CLCA2	chloride channel accessory 2	4.84705e-13	5.08746e-09	1.0685
GO:0006810	transport	AC064853.1	C2orf83	chromosome 2 open reading frame 83	4.84705e-13	5.08746e-09	1.0685
GO:0006810	transport	AC133550.1	ATP2A1	ATPase, Ca++ transporting, cardiac muscle, fast twitch 1	4.84705e-13	5.08746e-09	1.0685
GO:0006810	transport	ARFGEF1	ARFGEF1	ADP-ribosylation factor guanine nucleotide-exchange factor 1 (brefeldin A-inhibited)	4.84705e-13	5.08746e-09	1.0685
GO:0006810	transport	SEC24B	SEC24B	SEC24 family member B	4.84705e-13	5.08746e-09	1.0685
GO:0006810	transport	SEC24C	SEC24C	SEC24 family member C	4.84705e-13	5.08746e-09	1.0685
GO:0006810	transport	GOLT1A	GOLT1A	golgi transport 1A	4.84705e-13	5.08746e-09	1.0685
GO:0006810	transport	AC023449.1	ATP10A	ATPase, class V, type 10A	4.84705e-13	5.08746e-09	1.0685
GO:0006810	transport	SLC16A11	SLC16A11	solute carrier family 16, member 11	4.84705e-13	5.08746e-09	1.0685
GO:0006810	transport	MPDU1	MPDU1	mannose-P-dolichol utilization defect 1	4.84705e-13	5.08746e-09	1.0685
GO:0006810	transport	CPT2	CPT2	carnitine palmitoyltransferase 2	4.84705e-13	5.08746e-09	1.0685
GO:0006810	transport	SNX18	SNX18	sorting nexin 18	4.84705e-13	5.08746e-09	1.0685
GO:0006810	transport	HNRNPA1	HNRNPA1	heterogeneous nuclear ribonucleoprotein A1	4.84705e-13	5.08746e-09	1.0685
GO:0006810	transport	RAB37	RAB37	RAB37, member RAS oncogene family	4.84705e-13	5.08746e-09	1.0685
GO:0006810	transport	CEP41	CEP41	centrosomal protein 41kDa	4.84705e-13	5.08746e-09	1.0685
GO:0006810	transport	AQP6	AQP6	aquaporin 6, kidney specific	4.84705e-13	5.08746e-09	1.0685
GO:0006810	transport	TMEM63A	TMEM63A	transmembrane protein 63A	4.84705e-13	5.08746e-09	1.0685
GO:0006810	transport	RP2	RP2	retinitis pigmentosa 2 (X-linked recessive)	4.84705e-13	5.08746e-09	1.0685
GO:0006810	transport	AC096996.1	ABCC12	ATP-binding cassette, sub-family C (CFTR/MRP), member 12	4.84705e-13	5.08746e-09	1.0685
GO:0006810	transport	AL353719.1	SLC25A28	solute carrier family 25 (mitochondrial iron transporter), member 28	4.84705e-13	5.08746e-09	1.0685
GO:0006810	transport	SLC2A13	SLC2A13	solute carrier family 2 (facilitated glucose transporter), member 13	4.84705e-13	5.08746e-09	1.0685
GO:0006810	transport	CHRNG	CHRNG	cholinergic receptor, nicotinic, gamma (muscle)	4.84705e-13	5.08746e-09	1.0685
GO:0006810	transport	SYT7	SYT7	synaptotagmin VII	4.84705e-13	5.08746e-09	1.0685
GO:0006810	transport	AC108941.1	CSN1S1	casein alpha s1	4.84705e-13	5.08746e-09	1.0685
GO:0006810	transport	MX2	MX2	MX dynamin-like GTPase 2	4.84705e-13	5.08746e-09	1.0685
GO:0006810	transport	TIMM17B	TIMM17B	translocase of inner mitochondrial membrane 17 homolog B (yeast)	4.84705e-13	5.08746e-09	1.0685
GO:0006810	transport	LRRC8A	LRRC8A	leucine rich repeat containing 8 family, member A	4.84705e-13	5.08746e-09	1.0685
GO:0006810	transport	STX3	STX3	syntaxin 3	4.84705e-13	5.08746e-09	1.0685
GO:0006810	transport	SLC25A45	SLC25A45	solute carrier family 25, member 45	4.84705e-13	5.08746e-09	1.0685
GO:0006810	transport	AL390039.1	NUP62CL	nucleoporin 62kDa C-terminal like	4.84705e-13	5.08746e-09	1.0685
GO:0006810	transport	TOM1L1	TOM1L1	target of myb1 (chicken)-like 1	4.84705e-13	5.08746e-09	1.0685
GO:0006810	transport	MVB12B	MVB12B	multivesicular body subunit 12B	4.84705e-13	5.08746e-09	1.0685
GO:0006810	transport	SLC25A19	SLC25A19	solute carrier family 25 (mitochondrial thiamine pyrophosphate carrier), member 19	4.84705e-13	5.08746e-09	1.0685
GO:0006810	transport	GABRB1	GABRB1	gamma-aminobutyric acid (GABA) A receptor, beta 1	4.84705e-13	5.08746e-09	1.0685
GO:0006810	transport	TRAPPC2L	TRAPPC2L	trafficking protein particle complex 2-like	4.84705e-13	5.08746e-09	1.0685
GO:0006810	transport	SCN7A	SCN7A	sodium channel, voltage-gated, type VII, alpha subunit	4.84705e-13	5.08746e-09	1.0685
GO:0006810	transport	PANX2	PANX2	pannexin 2	4.84705e-13	5.08746e-09	1.0685
GO:0006810	transport	CNIH1	CNIH1	cornichon family AMPA receptor auxiliary protein 1	4.84705e-13	5.08746e-09	1.0685
GO:0006810	transport	KCNK17	KCNK17	potassium channel, subfamily K, member 17	4.84705e-13	5.08746e-09	1.0685
GO:0006810	transport	TRAPPC8	TRAPPC8	trafficking protein particle complex 8	4.84705e-13	5.08746e-09	1.0685
GO:0006810	transport	AC027796.4	CTNS	cystinosin, lysosomal cystine transporter	4.84705e-13	5.08746e-09	1.0685
GO:0006810	transport	GABRD	GABRD	gamma-aminobutyric acid (GABA) A receptor, delta	4.84705e-13	5.08746e-09	1.0685
GO:0006810	transport	PKD1L1	PKD1L1	polycystic kidney disease 1 like 1	4.84705e-13	5.08746e-09	1.0685
GO:0006810	transport	AC008957.2	SLC1A3	solute carrier family 1 (glial high affinity glutamate transporter), member 3	4.84705e-13	5.08746e-09	1.0685
GO:0006810	transport	HERC1	HERC1	HECT and RLD domain containing E3 ubiquitin protein ligase family member 1	4.84705e-13	5.08746e-09	1.0685
GO:0006810	transport	AL136295.3	CHMP4A	charged multivesicular body protein 4A	4.84705e-13	5.08746e-09	1.0685
GO:0006810	transport	CALHM1	CALHM1	calcium homeostasis modulator 1	4.84705e-13	5.08746e-09	1.0685
GO:0006810	transport	AC073525.1	KCNC2	potassium voltage-gated channel, Shaw-related subfamily, member 2	4.84705e-13	5.08746e-09	1.0685
GO:0006810	transport	SLC44A1	SLC44A1	solute carrier family 44 (choline transporter), member 1	4.84705e-13	5.08746e-09	1.0685
GO:0006810	transport	CPT1B	CPT1B	carnitine palmitoyltransferase 1B (muscle)	4.84705e-13	5.08746e-09	1.0685
GO:0006810	transport	SLC2A6	SLC2A6	solute carrier family 2 (facilitated glucose transporter), member 6	4.84705e-13	5.08746e-09	1.0685
GO:0006810	transport	TAP1	TAP1	transporter 1, ATP-binding cassette, sub-family B (MDR/TAP)	4.84705e-13	5.08746e-09	1.0685
GO:0006810	transport	LCN8	LCN8	lipocalin 8	4.84705e-13	5.08746e-09	1.0685
GO:0006810	transport	AC103834.1	TNKS	tankyrase, TRF1-interacting ankyrin-related ADP-ribose polymerase	4.84705e-13	5.08746e-09	1.0685
GO:0006810	transport	GABRA5	GABRA5	gamma-aminobutyric acid (GABA) A receptor, alpha 5	4.84705e-13	5.08746e-09	1.0685
GO:0006810	transport	SLC6A13	SLC6A13	solute carrier family 6 (neurotransmitter transporter), member 13	4.84705e-13	5.08746e-09	1.0685
GO:0006810	transport	STEAP3	STEAP3	STEAP family member 3, metalloreductase	4.84705e-13	5.08746e-09	1.0685
GO:0006810	transport	SLC18A3	SLC18A3	solute carrier family 18 (vesicular acetylcholine transporter), member 3	4.84705e-13	5.08746e-09	1.0685
GO:0006810	transport	SLC25A39	SLC25A39	solute carrier family 25, member 39	4.84705e-13	5.08746e-09	1.0685
GO:0006810	transport	SLC30A7	SLC30A7	solute carrier family 30 (zinc transporter), member 7	4.84705e-13	5.08746e-09	1.0685
GO:0006810	transport	AL050349.1	CHMP4B	charged multivesicular body protein 4B	4.84705e-13	5.08746e-09	1.0685
GO:0006810	transport	MAP6	MAP6	microtubule-associated protein 6	4.84705e-13	5.08746e-09	1.0685
GO:0006810	transport	SLC25A11	SLC25A11	solute carrier family 25 (mitochondrial carrier; oxoglutarate carrier), member 11	4.84705e-13	5.08746e-09	1.0685
GO:0006810	transport	SLC34A3	SLC34A3	solute carrier family 34 (type II sodium/phosphate contransporter), member 3	4.84705e-13	5.08746e-09	1.0685
GO:0006810	transport	AC091607.1	KCNAB1	potassium voltage-gated channel, shaker-related subfamily, beta member 1	4.84705e-13	5.08746e-09	1.0685
GO:0006810	transport	KCNN1	KCNN1	potassium intermediate/small conductance calcium-activated channel, subfamily N, member 1	4.84705e-13	5.08746e-09	1.0685
GO:0006810	transport	RAB3IL1	RAB3IL1	RAB3A interacting protein (rabin3)-like 1	4.84705e-13	5.08746e-09	1.0685
GO:0006810	transport	LHFPL5	LHFPL5	lipoma HMGIC fusion partner-like 5	4.84705e-13	5.08746e-09	1.0685
GO:0006810	transport	SLC27A4	SLC27A4	solute carrier family 27 (fatty acid transporter), member 4	4.84705e-13	5.08746e-09	1.0685
GO:0006810	transport	TIMM50	TIMM50	translocase of inner mitochondrial membrane 50 homolog (S. cerevisiae)	4.84705e-13	5.08746e-09	1.0685
GO:0006810	transport	EXOC1	EXOC1	exocyst complex component 1	4.84705e-13	5.08746e-09	1.0685
GO:0006810	transport	PKD2L1	PKD2L1	polycystic kidney disease 2-like 1	4.84705e-13	5.08746e-09	1.0685
GO:0006810	transport	GRIN3B	GRIN3B	glutamate receptor, ionotropic, N-methyl-D-aspartate 3B	4.84705e-13	5.08746e-09	1.0685
GO:0006810	transport	SLC6A12	SLC6A12	solute carrier family 6 (neurotransmitter transporter), member 12	4.84705e-13	5.08746e-09	1.0685
GO:0006810	transport	ATP5S	ATP5S	ATP synthase, H+ transporting, mitochondrial Fo complex, subunit s (factor B)	4.84705e-13	5.08746e-09	1.0685
GO:0006810	transport	SLC37A2	SLC37A2	solute carrier family 37 (glucose-6-phosphate transporter), member 2	4.84705e-13	5.08746e-09	1.0685
GO:0006810	transport	TSPO	TSPO	translocator protein (18kDa)	4.84705e-13	5.08746e-09	1.0685
GO:0006810	transport	VPS51	VPS51	vacuolar protein sorting 51 homolog (S. cerevisiae)	4.84705e-13	5.08746e-09	1.0685
GO:0006810	transport	AGAP2	AGAP2	ArfGAP with GTPase domain, ankyrin repeat and PH domain 2	4.84705e-13	5.08746e-09	1.0685
GO:0006810	transport	SLC51B	SLC51B	solute carrier family 51, beta subunit	4.84705e-13	5.08746e-09	1.0685
GO:0006810	transport	HDLBP	HDLBP	high density lipoprotein binding protein	4.84705e-13	5.08746e-09	1.0685
GO:0006810	transport	APOE	APOE	apolipoprotein E	4.84705e-13	5.08746e-09	1.0685
GO:0006810	transport	CHRNA9	CHRNA9	cholinergic receptor, nicotinic, alpha 9 (neuronal)	4.84705e-13	5.08746e-09	1.0685
GO:0006810	transport	VTI1B	VTI1B	vesicle transport through interaction with t-SNAREs 1B	4.84705e-13	5.08746e-09	1.0685
GO:0006810	transport	COG7	COG7	component of oligomeric golgi complex 7	4.84705e-13	5.08746e-09	1.0685
GO:0006810	transport	SLC7A11	SLC7A11	solute carrier family 7 (anionic amino acid transporter light chain, xc- system), member 11	4.84705e-13	5.08746e-09	1.0685
GO:0006810	transport	ABCA13	ABCA13	ATP-binding cassette, sub-family A (ABC1), member 13	4.84705e-13	5.08746e-09	1.0685
GO:0006810	transport	LIN7C	LIN7C	lin-7 homolog C (C. elegans)	4.84705e-13	5.08746e-09	1.0685
GO:0006810	transport	SNF8	SNF8	SNF8, ESCRT-II complex subunit	4.84705e-13	5.08746e-09	1.0685
GO:0006810	transport	SLC17A2	SLC17A2	solute carrier family 17, member 2	4.84705e-13	5.08746e-09	1.0685
GO:0006810	transport	ARF5	ARF5	ADP-ribosylation factor 5	4.84705e-13	5.08746e-09	1.0685
GO:0006810	transport	KCNIP3	KCNIP3	Kv channel interacting protein 3, calsenilin	4.84705e-13	5.08746e-09	1.0685
GO:0006810	transport	SLC16A13	SLC16A13	solute carrier family 16, member 13	4.84705e-13	5.08746e-09	1.0685
GO:0006810	transport	MMGT1	MMGT1	membrane magnesium transporter 1	4.84705e-13	5.08746e-09	1.0685
GO:0006810	transport	DYNC1I2	DYNC1I2	dynein, cytoplasmic 1, intermediate chain 2	4.84705e-13	5.08746e-09	1.0685
GO:0006810	transport	UCP3	UCP3	uncoupling protein 3 (mitochondrial, proton carrier)	4.84705e-13	5.08746e-09	1.0685
GO:0006810	transport	FYTTD1	FYTTD1	forty-two-three domain containing 1	4.84705e-13	5.08746e-09	1.0685
GO:0006810	transport	SLC2A11	SLC2A11	solute carrier family 2 (facilitated glucose transporter), member 11	4.84705e-13	5.08746e-09	1.0685
GO:0006810	transport	GJA1	GJA1	gap junction protein, alpha 1, 43kDa	4.84705e-13	5.08746e-09	1.0685
GO:0006810	transport	PTGDS	PTGDS	prostaglandin D2 synthase 21kDa (brain)	4.84705e-13	5.08746e-09	1.0685
GO:0006810	transport	SLC35E1	SLC35E1	solute carrier family 35, member E1	4.84705e-13	5.08746e-09	1.0685
GO:0006810	transport	LCN12	LCN12	lipocalin 12	4.84705e-13	5.08746e-09	1.0685
GO:0006810	transport	AC005180.2	GJC1	gap junction protein, gamma 1, 45kDa	4.84705e-13	5.08746e-09	1.0685
GO:0006810	transport	TRPM8	TRPM8	transient receptor potential cation channel, subfamily M, member 8	4.84705e-13	5.08746e-09	1.0685
GO:0006810	transport	AC012184.4	DDX19A	DEAD (Asp-Glu-Ala-Asp) box polypeptide 19A	4.84705e-13	5.08746e-09	1.0685
GO:0006810	transport	CACNG1	CACNG1	calcium channel, voltage-dependent, gamma subunit 1	4.84705e-13	5.08746e-09	1.0685
GO:0006810	transport	AP006288.1	SLC22A11	solute carrier family 22 (organic anion/urate transporter), member 11	4.84705e-13	5.08746e-09	1.0685
GO:0006810	transport	ATP6V0E1	ATP6V0E1	ATPase, H+ transporting, lysosomal 9kDa, V0 subunit e1	4.84705e-13	5.08746e-09	1.0685
GO:0006810	transport	SLC7A2	SLC7A2	solute carrier family 7 (cationic amino acid transporter, y+ system), member 2	4.84705e-13	5.08746e-09	1.0685
GO:0006810	transport	SLC52A3	SLC52A3	solute carrier family 52 (riboflavin transporter), member 3	4.84705e-13	5.08746e-09	1.0685
GO:0006810	transport	VPS54	VPS54	vacuolar protein sorting 54 homolog (S. cerevisiae)	4.84705e-13	5.08746e-09	1.0685
GO:0006810	transport	PITPNM3	PITPNM3	PITPNM family member 3	4.84705e-13	5.08746e-09	1.0685
GO:0006810	transport	STX12	STX12	syntaxin 12	4.84705e-13	5.08746e-09	1.0685
GO:0006810	transport	SLC22A9	SLC22A9	solute carrier family 22 (organic anion transporter), member 9	4.84705e-13	5.08746e-09	1.0685
GO:0006810	transport	CHP2	CHP2	calcineurin-like EF-hand protein 2	4.84705e-13	5.08746e-09	1.0685
GO:0006810	transport	AC024933.1	COPB2	coatomer protein complex, subunit beta 2 (beta prime)	4.84705e-13	5.08746e-09	1.0685
GO:0006810	transport	AL137074.1	BICD2	bicaudal D homolog 2 (Drosophila)	4.84705e-13	5.08746e-09	1.0685
GO:0006810	transport	YKT6	YKT6	YKT6 v-SNARE homolog (S. cerevisiae)	4.84705e-13	5.08746e-09	1.0685
GO:0006810	transport	SLC34A1	SLC34A1	solute carrier family 34 (type II sodium/phosphate contransporter), member 1	4.84705e-13	5.08746e-09	1.0685
GO:0006810	transport	SLC26A8	SLC26A8	solute carrier family 26 (anion exchanger), member 8	4.84705e-13	5.08746e-09	1.0685
GO:0006810	transport	RAB3D	RAB3D	RAB3D, member RAS oncogene family	4.84705e-13	5.08746e-09	1.0685
GO:0006810	transport	ARF4	ARF4	ADP-ribosylation factor 4	4.84705e-13	5.08746e-09	1.0685
GO:0006810	transport	AC131888.1	PKD1L2	polycystic kidney disease 1-like 2 (gene/pseudogene)	4.84705e-13	5.08746e-09	1.0685
GO:0006810	transport	PHAX	PHAX	phosphorylated adaptor for RNA export	4.84705e-13	5.08746e-09	1.0685
GO:0006810	transport	TF	TF	transferrin	4.84705e-13	5.08746e-09	1.0685
GO:0006810	transport	KCNH3	KCNH3	potassium voltage-gated channel, subfamily H (eag-related), member 3	4.84705e-13	5.08746e-09	1.0685
GO:0006810	transport	PIK3R1	PIK3R1	phosphoinositide-3-kinase, regulatory subunit 1 (alpha)	4.84705e-13	5.08746e-09	1.0685
GO:0006810	transport	KCNB1	KCNB1	potassium voltage-gated channel, Shab-related subfamily, member 1	4.84705e-13	5.08746e-09	1.0685
GO:0006810	transport	SLC25A14	SLC25A14	solute carrier family 25 (mitochondrial carrier, brain), member 14	4.84705e-13	5.08746e-09	1.0685
GO:0006810	transport	DYNC1H1	DYNC1H1	dynein, cytoplasmic 1, heavy chain 1	4.84705e-13	5.08746e-09	1.0685
GO:0006810	transport	APBA1	APBA1	amyloid beta (A4) precursor protein-binding, family A, member 1	4.84705e-13	5.08746e-09	1.0685
GO:0006810	transport	AGFG1	AGFG1	ArfGAP with FG repeats 1	4.84705e-13	5.08746e-09	1.0685
GO:0006810	transport	SLC25A35	SLC25A35	solute carrier family 25, member 35	4.84705e-13	5.08746e-09	1.0685
GO:0006810	transport	GRIA3	GRIA3	glutamate receptor, ionotropic, AMPA 3	4.84705e-13	5.08746e-09	1.0685
GO:0006810	transport	RAB6B	RAB6B	RAB6B, member RAS oncogene family	4.84705e-13	5.08746e-09	1.0685
GO:0006810	transport	SLC11A1	SLC11A1	solute carrier family 11 (proton-coupled divalent metal ion transporter), member 1	4.84705e-13	5.08746e-09	1.0685
GO:0006810	transport	AC098828.3	LAPTM4A	lysosomal protein transmembrane 4 alpha	4.84705e-13	5.08746e-09	1.0685
GO:0006810	transport	AP001972.2	SLCO2B1	solute carrier organic anion transporter family, member 2B1	4.84705e-13	5.08746e-09	1.0685
GO:0006810	transport	VPS39	VPS39	vacuolar protein sorting 39 homolog (S. cerevisiae)	4.84705e-13	5.08746e-09	1.0685
GO:0006810	transport	SPNS2	SPNS2	spinster homolog 2 (Drosophila)	4.84705e-13	5.08746e-09	1.0685
GO:0006810	transport	NUP133	NUP133	nucleoporin 133kDa	4.84705e-13	5.08746e-09	1.0685
GO:0006810	transport	SLC25A4	SLC25A4	solute carrier family 25 (mitochondrial carrier; adenine nucleotide translocator), member 4	4.84705e-13	5.08746e-09	1.0685
GO:0006810	transport	AL365223.1	PEX7	peroxisomal biogenesis factor 7	4.84705e-13	5.08746e-09	1.0685
GO:0006810	transport	TMEM38A	TMEM38A	transmembrane protein 38A	4.84705e-13	5.08746e-09	1.0685
GO:0006810	transport	CSE1L	CSE1L	CSE1 chromosome segregation 1-like (yeast)	4.84705e-13	5.08746e-09	1.0685
GO:0006810	transport	ARFGEF2	ARFGEF2	ADP-ribosylation factor guanine nucleotide-exchange factor 2 (brefeldin A-inhibited)	4.84705e-13	5.08746e-09	1.0685
GO:0006810	transport	RAB15	RAB15	RAB15, member RAS oncogene family	4.84705e-13	5.08746e-09	1.0685
GO:0006810	transport	SLC35F3	SLC35F3	solute carrier family 35, member F3	4.84705e-13	5.08746e-09	1.0685
GO:0006810	transport	RAB3A	RAB3A	RAB3A, member RAS oncogene family	4.84705e-13	5.08746e-09	1.0685
GO:0006810	transport	VPS26A	VPS26A	vacuolar protein sorting 26 homolog A (S. pombe)	4.84705e-13	5.08746e-09	1.0685
GO:0006810	transport	RAB9B	RAB9B	RAB9B, member RAS oncogene family	4.84705e-13	5.08746e-09	1.0685
GO:0006810	transport	GOSR1	GOSR1	golgi SNAP receptor complex member 1	4.84705e-13	5.08746e-09	1.0685
GO:0006810	transport	AC136624.1	ABCC1	ATP-binding cassette, sub-family C (CFTR/MRP), member 1	4.84705e-13	5.08746e-09	1.0685
GO:0006810	transport	FABP2	FABP2	fatty acid binding protein 2, intestinal	4.84705e-13	5.08746e-09	1.0685
GO:0006810	transport	ALB	ALB	albumin	4.84705e-13	5.08746e-09	1.0685
GO:0006810	transport	P2RX1	P2RX1	purinergic receptor P2X, ligand-gated ion channel, 1	4.84705e-13	5.08746e-09	1.0685
GO:0006810	transport	AQP7	AQP7	aquaporin 7	4.84705e-13	5.08746e-09	1.0685
GO:0006810	transport	STX4	STX4	syntaxin 4	4.84705e-13	5.08746e-09	1.0685
GO:0006810	transport	SLC25A34	SLC25A34	solute carrier family 25, member 34	4.84705e-13	5.08746e-09	1.0685
GO:0006810	transport	RAB1B	RAB1B	RAB1B, member RAS oncogene family	4.84705e-13	5.08746e-09	1.0685
GO:0006810	transport	AC135999.1	GABRB3	gamma-aminobutyric acid (GABA) A receptor, beta 3	4.84705e-13	5.08746e-09	1.0685
GO:0006810	transport	AC009487.3	SLC4A10	solute carrier family 4, sodium bicarbonate transporter, member 10	4.84705e-13	5.08746e-09	1.0685
GO:0006810	transport	KHSRP	KHSRP	KH-type splicing regulatory protein	4.84705e-13	5.08746e-09	1.0685
GO:0006810	transport	SLC5A2	SLC5A2	solute carrier family 5 (sodium/glucose cotransporter), member 2	4.84705e-13	5.08746e-09	1.0685
GO:0006810	transport	SORBS1	SORBS1	sorbin and SH3 domain containing 1	4.84705e-13	5.08746e-09	1.0685
GO:0006810	transport	MCOLN2	MCOLN2	mucolipin 2	4.84705e-13	5.08746e-09	1.0685
GO:0006810	transport	AL513185.2	MICU1	mitochondrial calcium uptake 1	4.84705e-13	5.08746e-09	1.0685
GO:0006810	transport	TOM1L2	TOM1L2	target of myb1-like 2 (chicken)	4.84705e-13	5.08746e-09	1.0685
GO:0006810	transport	SLC16A3	SLC16A3	solute carrier family 16 (monocarboxylate transporter), member 3	4.84705e-13	5.08746e-09	1.0685
GO:0006810	transport	GLRA1	GLRA1	glycine receptor, alpha 1	4.84705e-13	5.08746e-09	1.0685
GO:0006810	transport	GABRB2	GABRB2	gamma-aminobutyric acid (GABA) A receptor, beta 2	4.84705e-13	5.08746e-09	1.0685
GO:0006810	transport	SYP	SYP	synaptophysin	4.84705e-13	5.08746e-09	1.0685
GO:0006810	transport	SFT2D2	SFT2D2	SFT2 domain containing 2	4.84705e-13	5.08746e-09	1.0685
GO:0006810	transport	GRIA4	GRIA4	glutamate receptor, ionotropic, AMPA 4	4.84705e-13	5.08746e-09	1.0685
GO:0006810	transport	AC124784.1	ZDHHC17	zinc finger, DHHC-type containing 17	4.84705e-13	5.08746e-09	1.0685
GO:0006810	transport	BEST1	BEST1	bestrophin 1	4.84705e-13	5.08746e-09	1.0685
GO:0006810	transport	SCN5A	SCN5A	sodium channel, voltage-gated, type V, alpha subunit	4.84705e-13	5.08746e-09	1.0685
GO:0006810	transport	KCNT1	KCNT1	potassium channel, subfamily T, member 1	4.84705e-13	5.08746e-09	1.0685
GO:0006810	transport	SNX12	SNX12	sorting nexin 12	4.84705e-13	5.08746e-09	1.0685
GO:0006810	transport	RINL	RINL	Ras and Rab interactor-like	4.84705e-13	5.08746e-09	1.0685
GO:0006810	transport	AL845331.3	LOC100509620	putative aquaporin-7-like protein 3-like	4.84705e-13	5.08746e-09	1.0685
GO:0006810	transport	RAB11B	RAB11B	RAB11B, member RAS oncogene family	4.84705e-13	5.08746e-09	1.0685
GO:0006810	transport	CLCA1	CLCA1	chloride channel accessory 1	4.84705e-13	5.08746e-09	1.0685
GO:0006810	transport	BEST2	BEST2	bestrophin 2	4.84705e-13	5.08746e-09	1.0685
GO:0006810	transport	AC139887.4	CPLX1	complexin 1	4.84705e-13	5.08746e-09	1.0685
GO:0006810	transport	SLC28A1	SLC28A1	solute carrier family 28 (concentrative nucleoside transporter), member 1	4.84705e-13	5.08746e-09	1.0685
GO:0006810	transport	GABRR3	GABRR3	gamma-aminobutyric acid (GABA) A receptor, rho 3 (gene/pseudogene)	4.84705e-13	5.08746e-09	1.0685
GO:0006810	transport	RRBP1	RRBP1	ribosome binding protein 1	4.84705e-13	5.08746e-09	1.0685
GO:0006810	transport	TRPV3	TRPV3	transient receptor potential cation channel, subfamily V, member 3	4.84705e-13	5.08746e-09	1.0685
GO:0006810	transport	AC044839.2	SLC35C1	solute carrier family 35 (GDP-fucose transporter), member C1	4.84705e-13	5.08746e-09	1.0685
GO:0006810	transport	SLC16A9	SLC16A9	solute carrier family 16, member 9	4.84705e-13	5.08746e-09	1.0685
GO:0006810	transport	COG1	COG1	component of oligomeric golgi complex 1	4.84705e-13	5.08746e-09	1.0685
GO:0006810	transport	AKAP9	AKAP9	A kinase (PRKA) anchor protein 9	4.84705e-13	5.08746e-09	1.0685
GO:0006810	transport	KCNG3	KCNG3	potassium voltage-gated channel, subfamily G, member 3	4.84705e-13	5.08746e-09	1.0685
GO:0006810	transport	AC022168.1	GRIN2A	glutamate receptor, ionotropic, N-methyl D-aspartate 2A	4.84705e-13	5.08746e-09	1.0685
GO:0006810	transport	SLC51A	SLC51A	solute carrier family 51, alpha subunit	4.84705e-13	5.08746e-09	1.0685
GO:0006810	transport	ATP13A1	ATP13A1	ATPase type 13A1	4.84705e-13	5.08746e-09	1.0685
GO:0006810	transport	AC008609.1	FABP6	fatty acid binding protein 6, ileal	4.84705e-13	5.08746e-09	1.0685
GO:0006810	transport	RAB3B	RAB3B	RAB3B, member RAS oncogene family	4.84705e-13	5.08746e-09	1.0685
GO:0006810	transport	RAB11FIP1	RAB11FIP1	RAB11 family interacting protein 1 (class I)	4.84705e-13	5.08746e-09	1.0685
GO:0006810	transport	NNAT	NNAT	neuronatin	4.84705e-13	5.08746e-09	1.0685
GO:0006810	transport	HBA1	HBA1	hemoglobin, alpha 1	4.84705e-13	5.08746e-09	1.0685
GO:0006810	transport	CLCN2	CLCN2	chloride channel, voltage-sensitive 2	4.84705e-13	5.08746e-09	1.0685
GO:0006810	transport	AL136972.1	SNAP91	synaptosomal-associated protein, 91kDa	4.84705e-13	5.08746e-09	1.0685
GO:0006810	transport	KCNH4	KCNH4	potassium voltage-gated channel, subfamily H (eag-related), member 4	4.84705e-13	5.08746e-09	1.0685
GO:0006810	transport	PITPNA	PITPNA	phosphatidylinositol transfer protein, alpha	4.84705e-13	5.08746e-09	1.0685
GO:0006810	transport	OSBPL11	OSBPL11	oxysterol binding protein-like 11	4.84705e-13	5.08746e-09	1.0685
GO:0006810	transport	SLC25A3	SLC25A3	solute carrier family 25 (mitochondrial carrier; phosphate carrier), member 3	4.84705e-13	5.08746e-09	1.0685
GO:0006810	transport	SLC25A5	SLC25A5	solute carrier family 25 (mitochondrial carrier; adenine nucleotide translocator), member 5	4.84705e-13	5.08746e-09	1.0685
GO:0006810	transport	AC008622.1	SLC1A5	solute carrier family 1 (neutral amino acid transporter), member 5	4.84705e-13	5.08746e-09	1.0685
GO:0006810	transport	AC124301.1	KCNC1	potassium voltage-gated channel, Shaw-related subfamily, member 1	4.84705e-13	5.08746e-09	1.0685
GO:0006810	transport	AC245427.1	TRPV5	transient receptor potential cation channel, subfamily V, member 5	4.84705e-13	5.08746e-09	1.0685
GO:0006810	transport	UNC50	UNC50	unc-50 homolog (C. elegans)	4.84705e-13	5.08746e-09	1.0685
GO:0006810	transport	SLC6A14	SLC6A14	solute carrier family 6 (amino acid transporter), member 14	4.84705e-13	5.08746e-09	1.0685
GO:0006810	transport	AP3D1	AP3D1	adaptor-related protein complex 3, delta 1 subunit	4.84705e-13	5.08746e-09	1.0685
GO:0006810	transport	AC011900.1	KCNH7	potassium voltage-gated channel, subfamily H (eag-related), member 7	4.84705e-13	5.08746e-09	1.0685
GO:0006810	transport	SELENBP1	SELENBP1	selenium binding protein 1	4.84705e-13	5.08746e-09	1.0685
GO:0006810	transport	SLC7A1	SLC7A1	solute carrier family 7 (cationic amino acid transporter, y+ system), member 1	4.84705e-13	5.08746e-09	1.0685
GO:0006810	transport	SLC50A1	SLC50A1	solute carrier family 50 (sugar efflux transporter), member 1	4.84705e-13	5.08746e-09	1.0685
GO:0006810	transport	PNPT1	PNPT1	polyribonucleotide nucleotidyltransferase 1	4.84705e-13	5.08746e-09	1.0685
GO:0006810	transport	ATG16L2	ATG16L2	autophagy related 16-like 2 (S. cerevisiae)	4.84705e-13	5.08746e-09	1.0685
GO:0006810	transport	KCNK3	KCNK3	potassium channel, subfamily K, member 3	4.84705e-13	5.08746e-09	1.0685
GO:0006810	transport	AC120498.10	CACNA1H	calcium channel, voltage-dependent, T type, alpha 1H subunit	4.84705e-13	5.08746e-09	1.0685
GO:0006810	transport	AC018620.1	STAU2	staufen double-stranded RNA binding protein 2	4.84705e-13	5.08746e-09	1.0685
GO:0006810	transport	GCC2	GCC2	GRIP and coiled-coil domain containing 2	4.84705e-13	5.08746e-09	1.0685
GO:0006810	transport	SNX25	SNX25	sorting nexin 25	4.84705e-13	5.08746e-09	1.0685
GO:0006810	transport	APOL2	APOL2	apolipoprotein L, 2	4.84705e-13	5.08746e-09	1.0685
GO:0006810	transport	SLC26A10	SLC26A10	solute carrier family 26, member 10	4.84705e-13	5.08746e-09	1.0685
GO:0006810	transport	SLC25A32	SLC25A32	solute carrier family 25 (mitochondrial folate carrier), member 32	4.84705e-13	5.08746e-09	1.0685
GO:0006810	transport	BEST4	BEST4	bestrophin 4	4.84705e-13	5.08746e-09	1.0685
GO:0006810	transport	CALHM2	CALHM2	calcium homeostasis modulator 2	4.84705e-13	5.08746e-09	1.0685
GO:0006810	transport	RAB21	RAB21	RAB21, member RAS oncogene family	4.84705e-13	5.08746e-09	1.0685
GO:0006810	transport	SLC11A2	SLC11A2	solute carrier family 11 (proton-coupled divalent metal ion transporter), member 2	4.84705e-13	5.08746e-09	1.0685
GO:0006810	transport	DYNLT1	DYNLT1	dynein, light chain, Tctex-type 1	4.84705e-13	5.08746e-09	1.0685
GO:0006810	transport	AGAP1	AGAP1	ArfGAP with GTPase domain, ankyrin repeat and PH domain 1	4.84705e-13	5.08746e-09	1.0685
GO:0006810	transport	SNX19	SNX19	sorting nexin 19	4.84705e-13	5.08746e-09	1.0685
GO:0006810	transport	NASP	NASP	nuclear autoantigenic sperm protein (histone-binding)	4.84705e-13	5.08746e-09	1.0685
GO:0006810	transport	SCAMP3	SCAMP3	secretory carrier membrane protein 3	4.84705e-13	5.08746e-09	1.0685
GO:0006810	transport	DOC2B	DOC2B	double C2-like domains, beta	4.84705e-13	5.08746e-09	1.0685
GO:0006810	transport	NXT1	NXT1	nuclear transport factor 2-like export factor 1	4.84705e-13	5.08746e-09	1.0685
GO:0006810	transport	SEC16B	SEC16B	SEC16 homolog B (S. cerevisiae)	4.84705e-13	5.08746e-09	1.0685
GO:0006810	transport	OSBPL3	OSBPL3	oxysterol binding protein-like 3	4.84705e-13	5.08746e-09	1.0685
GO:0006810	transport	SORT1	SORT1	sortilin 1	4.84705e-13	5.08746e-09	1.0685
GO:0006810	transport	AC005343.1	CACNA2D4	calcium channel, voltage-dependent, alpha 2/delta subunit 4	4.84705e-13	5.08746e-09	1.0685
GO:0006810	transport	AC073850.1	CD36	CD36 molecule (thrombospondin receptor)	4.84705e-13	5.08746e-09	1.0685
GO:0006810	transport	LCN15	LCN15	lipocalin 15	4.84705e-13	5.08746e-09	1.0685
GO:0006810	transport	SEC61G	SEC61G	Sec61 gamma subunit	4.84705e-13	5.08746e-09	1.0685
GO:0006810	transport	SCN3A	SCN3A	sodium channel, voltage-gated, type III, alpha subunit	4.84705e-13	5.08746e-09	1.0685
GO:0006810	transport	SIGMAR1	SIGMAR1	sigma non-opioid intracellular receptor 1	4.84705e-13	5.08746e-09	1.0685
GO:0006810	transport	AL663070.1	MFSD2A	major facilitator superfamily domain containing 2A	4.84705e-13	5.08746e-09	1.0685
GO:0006810	transport	TMC8	TMC8	transmembrane channel-like 8	4.84705e-13	5.08746e-09	1.0685
GO:0006810	transport	SYT12	SYT12	synaptotagmin XII	4.84705e-13	5.08746e-09	1.0685
GO:0006810	transport	AL118522.1	KCNK15	potassium channel, subfamily K, member 15	4.84705e-13	5.08746e-09	1.0685
GO:0016310	phosphorylation	ALPK3	ALPK3	alpha-kinase 3	4.20616e-12	2.20739e-08	1.10257
GO:0016310	phosphorylation	RPS6KB2	RPS6KB2	ribosomal protein S6 kinase, 70kDa, polypeptide 2	4.20616e-12	2.20739e-08	1.10257
GO:0016310	phosphorylation	PRKACG	PRKACG	protein kinase, cAMP-dependent, catalytic, gamma	4.20616e-12	2.20739e-08	1.10257
GO:0016310	phosphorylation	PIM3	PIM3	Pim-3 proto-oncogene, serine/threonine kinase	4.20616e-12	2.20739e-08	1.10257
GO:0016310	phosphorylation	LYN	LYN	LYN proto-oncogene, Src family tyrosine kinase	4.20616e-12	2.20739e-08	1.10257
GO:0016310	phosphorylation	DTYMK	DTYMK	deoxythymidylate kinase (thymidylate kinase)	4.20616e-12	2.20739e-08	1.10257
GO:0016310	phosphorylation	AC006128.1	AKAP8L	A kinase (PRKA) anchor protein 8-like	4.20616e-12	2.20739e-08	1.10257
GO:0016310	phosphorylation	ULK1	ULK1	unc-51 like autophagy activating kinase 1	4.20616e-12	2.20739e-08	1.10257
GO:0016310	phosphorylation	CKS1B	CKS1B	CDC28 protein kinase regulatory subunit 1B	4.20616e-12	2.20739e-08	1.10257
GO:0016310	phosphorylation	AKAP2	AKAP2	A kinase (PRKA) anchor protein 2	4.20616e-12	2.20739e-08	1.10257
GO:0016310	phosphorylation	NELL1	NELL1	NEL-like 1 (chicken)	4.20616e-12	2.20739e-08	1.10257
GO:0016310	phosphorylation	AC064836.2	BMPR2	bone morphogenetic protein receptor, type II (serine/threonine kinase)	4.20616e-12	2.20739e-08	1.10257
GO:0016310	phosphorylation	VRK2	VRK2	vaccinia related kinase 2	4.20616e-12	2.20739e-08	1.10257
GO:0016310	phosphorylation	FGFR3	FGFR3	fibroblast growth factor receptor 3	4.20616e-12	2.20739e-08	1.10257
GO:0016310	phosphorylation	GK5	GK5	glycerol kinase 5 (putative)	4.20616e-12	2.20739e-08	1.10257
GO:0016310	phosphorylation	TBK1	TBK1	TANK-binding kinase 1	4.20616e-12	2.20739e-08	1.10257
GO:0016310	phosphorylation	TSSK1B	TSSK1B	testis-specific serine kinase 1B	4.20616e-12	2.20739e-08	1.10257
GO:0016310	phosphorylation	AL133372.3	PRKD1	protein kinase D1	4.20616e-12	2.20739e-08	1.10257
GO:0016310	phosphorylation	NEK8	NEK8	NIMA-related kinase 8	4.20616e-12	2.20739e-08	1.10257
GO:0016310	phosphorylation	RAF1	RAF1	Raf-1 proto-oncogene, serine/threonine kinase	4.20616e-12	2.20739e-08	1.10257
GO:0016310	phosphorylation	MAPK8IP3	MAPK8IP3	mitogen-activated protein kinase 8 interacting protein 3	4.20616e-12	2.20739e-08	1.10257
GO:0016310	phosphorylation	AC005037.1	CLK1	CDC-like kinase 1	4.20616e-12	2.20739e-08	1.10257
GO:0016310	phosphorylation	TPK1	TPK1	thiamin pyrophosphokinase 1	4.20616e-12	2.20739e-08	1.10257
GO:0016310	phosphorylation	DDR1	DDR1	discoidin domain receptor tyrosine kinase 1	4.20616e-12	2.20739e-08	1.10257
GO:0016310	phosphorylation	FES	FES	FES proto-oncogene, tyrosine kinase	4.20616e-12	2.20739e-08	1.10257
GO:0016310	phosphorylation	EIF2AK4	EIF2AK4	eukaryotic translation initiation factor 2 alpha kinase 4	4.20616e-12	2.20739e-08	1.10257
GO:0016310	phosphorylation	ACVR2A	ACVR2A	activin A receptor, type IIA	4.20616e-12	2.20739e-08	1.10257
GO:0016310	phosphorylation	AL449423.1	CDKN2A	cyclin-dependent kinase inhibitor 2A	4.20616e-12	2.20739e-08	1.10257
GO:0016310	phosphorylation	EPHB4	EPHB4	EPH receptor B4	4.20616e-12	2.20739e-08	1.10257
GO:0016310	phosphorylation	MAP3K6	MAP3K6	mitogen-activated protein kinase kinase kinase 6	4.20616e-12	2.20739e-08	1.10257
GO:0016310	phosphorylation	HIPK4	HIPK4	homeodomain interacting protein kinase 4	4.20616e-12	2.20739e-08	1.10257
GO:0016310	phosphorylation	PTK6	PTK6	protein tyrosine kinase 6	4.20616e-12	2.20739e-08	1.10257
GO:0016310	phosphorylation	AMHR2	AMHR2	anti-Mullerian hormone receptor, type II	4.20616e-12	2.20739e-08	1.10257
GO:0016310	phosphorylation	PDGFRB	PDGFRB	platelet-derived growth factor receptor, beta polypeptide	4.20616e-12	2.20739e-08	1.10257
GO:0016310	phosphorylation	MAP4K4	MAP4K4	mitogen-activated protein kinase kinase kinase kinase 4	4.20616e-12	2.20739e-08	1.10257
GO:0016310	phosphorylation	AC008937.1	MAP3K1	mitogen-activated protein kinase kinase kinase 1, E3 ubiquitin protein ligase	4.20616e-12	2.20739e-08	1.10257
GO:0016310	phosphorylation	RPS6KC1	RPS6KC1	ribosomal protein S6 kinase, 52kDa, polypeptide 1	4.20616e-12	2.20739e-08	1.10257
GO:0016310	phosphorylation	FGR	FGR	FGR proto-oncogene, Src family tyrosine kinase	4.20616e-12	2.20739e-08	1.10257
GO:0016310	phosphorylation	CAMK1	CAMK1	calcium/calmodulin-dependent protein kinase I	4.20616e-12	2.20739e-08	1.10257
GO:0016310	phosphorylation	AL356310.1	NEK2	NIMA-related kinase 2	4.20616e-12	2.20739e-08	1.10257
GO:0016310	phosphorylation	IGF1R	IGF1R	insulin-like growth factor 1 receptor	4.20616e-12	2.20739e-08	1.10257
GO:0016310	phosphorylation	TAOK3	TAOK3	TAO kinase 3	4.20616e-12	2.20739e-08	1.10257
GO:0016310	phosphorylation	AC084291.1	KSR2	kinase suppressor of ras 2	4.20616e-12	2.20739e-08	1.10257
GO:0016310	phosphorylation	GCK	GCK	glucokinase (hexokinase 4)	4.20616e-12	2.20739e-08	1.10257
GO:0016310	phosphorylation	PACSIN1	PACSIN1	protein kinase C and casein kinase substrate in neurons 1	4.20616e-12	2.20739e-08	1.10257
GO:0016310	phosphorylation	PAK4	PAK4	p21 protein (Cdc42/Rac)-activated kinase 4	4.20616e-12	2.20739e-08	1.10257
GO:0016310	phosphorylation	AL353572.1	CDK20	cyclin-dependent kinase 20	4.20616e-12	2.20739e-08	1.10257
GO:0016310	phosphorylation	AK4	AK4	adenylate kinase 4	4.20616e-12	2.20739e-08	1.10257
GO:0016310	phosphorylation	TTBK1	TTBK1	tau tubulin kinase 1	4.20616e-12	2.20739e-08	1.10257
GO:0016310	phosphorylation	AC116533.1	PIK3C2A	phosphatidylinositol-4-phosphate 3-kinase, catalytic subunit type 2 alpha	4.20616e-12	2.20739e-08	1.10257
GO:0016310	phosphorylation	CDK7	CDK7	cyclin-dependent kinase 7	4.20616e-12	2.20739e-08	1.10257
GO:0016310	phosphorylation	PIP5KL1	PIP5KL1	phosphatidylinositol-4-phosphate 5-kinase-like 1	4.20616e-12	2.20739e-08	1.10257
GO:0016310	phosphorylation	AL157932.1	DGKH	diacylglycerol kinase, eta	4.20616e-12	2.20739e-08	1.10257
GO:0016310	phosphorylation	AC073324.1	EGFR	epidermal growth factor receptor	4.20616e-12	2.20739e-08	1.10257
GO:0016310	phosphorylation	PRKX	PRKX	protein kinase, X-linked	4.20616e-12	2.20739e-08	1.10257
GO:0016310	phosphorylation	AKAP1	AKAP1	A kinase (PRKA) anchor protein 1	4.20616e-12	2.20739e-08	1.10257
GO:0016310	phosphorylation	TGFBR2	TGFBR2	transforming growth factor, beta receptor II (70/80kDa)	4.20616e-12	2.20739e-08	1.10257
GO:0016310	phosphorylation	PBK	PBK	PDZ binding kinase	4.20616e-12	2.20739e-08	1.10257
GO:0016310	phosphorylation	STK10	STK10	serine/threonine kinase 10	4.20616e-12	2.20739e-08	1.10257
GO:0016310	phosphorylation	PLK4	PLK4	polo-like kinase 4	4.20616e-12	2.20739e-08	1.10257
GO:0016310	phosphorylation	AC015914.2	DAPK2	death-associated protein kinase 2	4.20616e-12	2.20739e-08	1.10257
GO:0016310	phosphorylation	PIP5K1B	PIP5K1B	phosphatidylinositol-4-phosphate 5-kinase, type I, beta	4.20616e-12	2.20739e-08	1.10257
GO:0016310	phosphorylation	AC020595.1	CERKL	ceramide kinase-like	4.20616e-12	2.20739e-08	1.10257
GO:0016310	phosphorylation	MAPK14	MAPK14	mitogen-activated protein kinase 14	4.20616e-12	2.20739e-08	1.10257
GO:0016310	phosphorylation	CSNK2A1	CSNK2A1	casein kinase 2, alpha 1 polypeptide	4.20616e-12	2.20739e-08	1.10257
GO:0016310	phosphorylation	ITPK1	ITPK1	inositol-tetrakisphosphate 1-kinase	4.20616e-12	2.20739e-08	1.10257
GO:0016310	phosphorylation	PKN3	PKN3	protein kinase N3	4.20616e-12	2.20739e-08	1.10257
GO:0016310	phosphorylation	STK17B	STK17B	serine/threonine kinase 17b	4.20616e-12	2.20739e-08	1.10257
GO:0016310	phosphorylation	AC245452.2	PPM1F	protein phosphatase, Mg2+/Mn2+ dependent, 1F	4.20616e-12	2.20739e-08	1.10257
GO:0016310	phosphorylation	PRPS1L1	PRPS1L1	phosphoribosyl pyrophosphate synthetase 1-like 1	4.20616e-12	2.20739e-08	1.10257
GO:0016310	phosphorylation	MET	MET	MET proto-oncogene, receptor tyrosine kinase	4.20616e-12	2.20739e-08	1.10257
GO:0016310	phosphorylation	AC083973.1	IKBKB	inhibitor of kappa light polypeptide gene enhancer in B-cells, kinase beta	4.20616e-12	2.20739e-08	1.10257
GO:0016310	phosphorylation	SEPHS2	SEPHS2	selenophosphate synthetase 2	4.20616e-12	2.20739e-08	1.10257
GO:0016310	phosphorylation	STRAP	STRAP	serine/threonine kinase receptor associated protein	4.20616e-12	2.20739e-08	1.10257
GO:0016310	phosphorylation	AC034102.8	CDK2	cyclin-dependent kinase 2	4.20616e-12	2.20739e-08	1.10257
GO:0016310	phosphorylation	ICK	ICK	intestinal cell (MAK-like) kinase	4.20616e-12	2.20739e-08	1.10257
GO:0016310	phosphorylation	GAK	GAK	cyclin G associated kinase	4.20616e-12	2.20739e-08	1.10257
GO:0016310	phosphorylation	MVK	MVK	mevalonate kinase	4.20616e-12	2.20739e-08	1.10257
GO:0016310	phosphorylation	AC005244.2	MAP2K4	mitogen-activated protein kinase kinase 4	4.20616e-12	2.20739e-08	1.10257
GO:0016310	phosphorylation	HASPIN	GSG2	germ cell associated 2 (haspin)	4.20616e-12	2.20739e-08	1.10257
GO:0016310	phosphorylation	NUCKS1	NUCKS1	nuclear casein kinase and cyclin-dependent kinase substrate 1	4.20616e-12	2.20739e-08	1.10257
GO:0016310	phosphorylation	PHKG1	PHKG1	phosphorylase kinase, gamma 1 (muscle)	4.20616e-12	2.20739e-08	1.10257
GO:0016310	phosphorylation	AC003087.1	STK31	serine/threonine kinase 31	4.20616e-12	2.20739e-08	1.10257
GO:0016310	phosphorylation	NEK4	NEK4	NIMA-related kinase 4	4.20616e-12	2.20739e-08	1.10257
GO:0016310	phosphorylation	HINT2	HINT2	histidine triad nucleotide binding protein 2	4.20616e-12	2.20739e-08	1.10257
GO:0016310	phosphorylation	PI4K2A	PI4K2A	phosphatidylinositol 4-kinase type 2 alpha	4.20616e-12	2.20739e-08	1.10257
GO:0016310	phosphorylation	AC104137.1	EPHA5	EPH receptor A5	4.20616e-12	2.20739e-08	1.10257
GO:0016310	phosphorylation	PDK3	PDK3	pyruvate dehydrogenase kinase, isozyme 3	4.20616e-12	2.20739e-08	1.10257
GO:0016310	phosphorylation	GRK5	GRK5	G protein-coupled receptor kinase 5	4.20616e-12	2.20739e-08	1.10257
GO:0016310	phosphorylation	PRKCD	PRKCD	protein kinase C, delta	4.20616e-12	2.20739e-08	1.10257
GO:0016310	phosphorylation	MAPKAPK3	MAPKAPK3	mitogen-activated protein kinase-activated protein kinase 3	4.20616e-12	2.20739e-08	1.10257
GO:0016310	phosphorylation	CAMKK1	CAMKK1	calcium/calmodulin-dependent protein kinase kinase 1, alpha	4.20616e-12	2.20739e-08	1.10257
GO:0016310	phosphorylation	AC073343.2	RSPH10B2	radial spoke head 10 homolog B2 (Chlamydomonas)	4.20616e-12	2.20739e-08	1.10257
GO:0016310	phosphorylation	AC095030.1	AK5	adenylate kinase 5	4.20616e-12	2.20739e-08	1.10257
GO:0016310	phosphorylation	PRKAR1B	PRKAR1B	protein kinase, cAMP-dependent, regulatory, type I, beta	4.20616e-12	2.20739e-08	1.10257
GO:0016310	phosphorylation	NT5C2	NT5C2	5'-nucleotidase, cytosolic II	4.20616e-12	2.20739e-08	1.10257
GO:0016310	phosphorylation	MAP3K3	MAP3K3	mitogen-activated protein kinase kinase kinase 3	4.20616e-12	2.20739e-08	1.10257
GO:0016310	phosphorylation	CDK12	CDK12	cyclin-dependent kinase 12	4.20616e-12	2.20739e-08	1.10257
GO:0016310	phosphorylation	CASK	CASK	calcium/calmodulin-dependent serine protein kinase (MAGUK family)	4.20616e-12	2.20739e-08	1.10257
GO:0016310	phosphorylation	ADCK5	ADCK5	aarF domain containing kinase 5	4.20616e-12	2.20739e-08	1.10257
GO:0016310	phosphorylation	CDK11B	CDK11B	cyclin-dependent kinase 11B	4.20616e-12	2.20739e-08	1.10257
GO:0016310	phosphorylation	BLK	BLK	BLK proto-oncogene, Src family tyrosine kinase	4.20616e-12	2.20739e-08	1.10257
GO:0016310	phosphorylation	LIMK2	LIMK2	LIM domain kinase 2	4.20616e-12	2.20739e-08	1.10257
GO:0016310	phosphorylation	PTK7	PTK7	protein tyrosine kinase 7 (inactive)	4.20616e-12	2.20739e-08	1.10257
GO:0016310	phosphorylation	HYKK	HYKK	hydroxylysine kinase	4.20616e-12	2.20739e-08	1.10257
GO:0016310	phosphorylation	AKAP10	AKAP10	A kinase (PRKA) anchor protein 10	4.20616e-12	2.20739e-08	1.10257
GO:0016310	phosphorylation	BMPR1B	BMPR1B	bone morphogenetic protein receptor, type IB	4.20616e-12	2.20739e-08	1.10257
GO:0016310	phosphorylation	AC016397.2	MAPK8	mitogen-activated protein kinase 8	4.20616e-12	2.20739e-08	1.10257
GO:0016310	phosphorylation	FN3K	FN3K	fructosamine 3 kinase	4.20616e-12	2.20739e-08	1.10257
GO:0016310	phosphorylation	PRKAA1	PRKAA1	protein kinase, AMP-activated, alpha 1 catalytic subunit	4.20616e-12	2.20739e-08	1.10257
GO:0016310	phosphorylation	DCAF1	VPRBP	Vpr (HIV-1) binding protein	4.20616e-12	2.20739e-08	1.10257
GO:0016310	phosphorylation	MAPK1	MAPK1	mitogen-activated protein kinase 1	4.20616e-12	2.20739e-08	1.10257
GO:0016310	phosphorylation	SLK	SLK	STE20-like kinase	4.20616e-12	2.20739e-08	1.10257
GO:0016310	phosphorylation	DOK2	DOK2	docking protein 2, 56kDa	4.20616e-12	2.20739e-08	1.10257
GO:0016310	phosphorylation	CDK11A	CDK11A	cyclin-dependent kinase 11A	4.20616e-12	2.20739e-08	1.10257
GO:0016310	phosphorylation	STK17A	STK17A	serine/threonine kinase 17a	4.20616e-12	2.20739e-08	1.10257
GO:0016310	phosphorylation	AC006355.2	MAGI2	membrane associated guanylate kinase, WW and PDZ domain containing 2	4.20616e-12	2.20739e-08	1.10257
GO:0016310	phosphorylation	CKM	CKM	creatine kinase, muscle	4.20616e-12	2.20739e-08	1.10257
GO:0016310	phosphorylation	AC007684.1	MAP4K3	mitogen-activated protein kinase kinase kinase kinase 3	4.20616e-12	2.20739e-08	1.10257
GO:0016310	phosphorylation	PIK3R3	PIK3R3	phosphoinositide-3-kinase, regulatory subunit 3 (gamma)	4.20616e-12	2.20739e-08	1.10257
GO:0016310	phosphorylation	DYRK2	DYRK2	dual-specificity tyrosine-(Y)-phosphorylation regulated kinase 2	4.20616e-12	2.20739e-08	1.10257
GO:0016310	phosphorylation	COASY	COASY	CoA synthase	4.20616e-12	2.20739e-08	1.10257
GO:0016310	phosphorylation	JAK2	JAK2	Janus kinase 2	4.20616e-12	2.20739e-08	1.10257
GO:0016310	phosphorylation	AL023754.1	CAMK1G	calcium/calmodulin-dependent protein kinase IG	4.20616e-12	2.20739e-08	1.10257
GO:0016310	phosphorylation	GSK3B	GSK3B	glycogen synthase kinase 3 beta	4.20616e-12	2.20739e-08	1.10257
GO:0016310	phosphorylation	AL450063.1	PRKACB	protein kinase, cAMP-dependent, catalytic, beta	4.20616e-12	2.20739e-08	1.10257
GO:0016310	phosphorylation	AL163051.1	AK7	adenylate kinase 7	4.20616e-12	2.20739e-08	1.10257
GO:0016310	phosphorylation	AL356423.1	STK24	serine/threonine kinase 24	4.20616e-12	2.20739e-08	1.10257
GO:0016310	phosphorylation	IP6K1	IP6K1	inositol hexakisphosphate kinase 1	4.20616e-12	2.20739e-08	1.10257
GO:0016310	phosphorylation	AC022537.1	PRKG1	protein kinase, cGMP-dependent, type I	4.20616e-12	2.20739e-08	1.10257
GO:0016310	phosphorylation	IRAK1	IRAK1	interleukin-1 receptor-associated kinase 1	4.20616e-12	2.20739e-08	1.10257
GO:0016310	phosphorylation	NOL9	NOL9	nucleolar protein 9	4.20616e-12	2.20739e-08	1.10257
GO:0016310	phosphorylation	BCR	BCR	breakpoint cluster region	4.20616e-12	2.20739e-08	1.10257
GO:0016310	phosphorylation	BRSK1	BRSK1	BR serine/threonine kinase 1	4.20616e-12	2.20739e-08	1.10257
GO:0016310	phosphorylation	PIM1	PIM1	Pim-1 proto-oncogene, serine/threonine kinase	4.20616e-12	2.20739e-08	1.10257
GO:0016310	phosphorylation	GIT1	GIT1	G protein-coupled receptor kinase interacting ArfGAP 1	4.20616e-12	2.20739e-08	1.10257
GO:0016310	phosphorylation	AC106870.2	ALK	anaplastic lymphoma receptor tyrosine kinase	4.20616e-12	2.20739e-08	1.10257
GO:0016310	phosphorylation	PHKG2	PHKG2	phosphorylase kinase, gamma 2 (testis)	4.20616e-12	2.20739e-08	1.10257
GO:0016310	phosphorylation	JAK3	JAK3	Janus kinase 3	4.20616e-12	2.20739e-08	1.10257
GO:0016310	phosphorylation	ACVR1C	ACVR1C	activin A receptor, type IC	4.20616e-12	2.20739e-08	1.10257
GO:0016310	phosphorylation	IBTK	IBTK	inhibitor of Bruton agammaglobulinemia tyrosine kinase	4.20616e-12	2.20739e-08	1.10257
GO:0016310	phosphorylation	PIK3CD	PIK3CD	phosphatidylinositol-4,5-bisphosphate 3-kinase, catalytic subunit delta	4.20616e-12	2.20739e-08	1.10257
GO:0016310	phosphorylation	AC068282.1	MAP3K2	mitogen-activated protein kinase kinase kinase 2	4.20616e-12	2.20739e-08	1.10257
GO:0016310	phosphorylation	ACVR1B	ACVR1B	activin A receptor, type IB	4.20616e-12	2.20739e-08	1.10257
GO:0016310	phosphorylation	MYLK4	MYLK4	myosin light chain kinase family, member 4	4.20616e-12	2.20739e-08	1.10257
GO:0016310	phosphorylation	MELK	MELK	maternal embryonic leucine zipper kinase	4.20616e-12	2.20739e-08	1.10257
GO:0016310	phosphorylation	AL391069.1	PI4KB	phosphatidylinositol 4-kinase, catalytic, beta	4.20616e-12	2.20739e-08	1.10257
GO:0016310	phosphorylation	AC027373.1	YWHAZ	tyrosine 3-monooxygenase/tryptophan 5-monooxygenase activation protein, zeta	4.20616e-12	2.20739e-08	1.10257
GO:0016310	phosphorylation	AKAP3	AKAP3	A kinase (PRKA) anchor protein 3	4.20616e-12	2.20739e-08	1.10257
GO:0016310	phosphorylation	SEPHS1	SEPHS1	selenophosphate synthetase 1	4.20616e-12	2.20739e-08	1.10257
GO:0016310	phosphorylation	RIPK2	RIPK2	receptor-interacting serine-threonine kinase 2	4.20616e-12	2.20739e-08	1.10257
GO:0016310	phosphorylation	IKBKG	IKBKG	inhibitor of kappa light polypeptide gene enhancer in B-cells, kinase gamma	4.20616e-12	2.20739e-08	1.10257
GO:0016310	phosphorylation	AL451042.1	EPHA2	EPH receptor A2	4.20616e-12	2.20739e-08	1.10257
GO:0016310	phosphorylation	AL355433.1	TEK	TEK tyrosine kinase, endothelial	4.20616e-12	2.20739e-08	1.10257
GO:0016310	phosphorylation	ULK4	ULK4	unc-51 like kinase 4	4.20616e-12	2.20739e-08	1.10257
GO:0016310	phosphorylation	CSK	CSK	c-src tyrosine kinase	4.20616e-12	2.20739e-08	1.10257
GO:0016310	phosphorylation	PGK1	PGK1	phosphoglycerate kinase 1	4.20616e-12	2.20739e-08	1.10257
GO:0016310	phosphorylation	AC005089.1	BAZ1B	bromodomain adjacent to zinc finger domain, 1B	4.20616e-12	2.20739e-08	1.10257
GO:0016310	phosphorylation	TESK1	TESK1	testis-specific kinase 1	4.20616e-12	2.20739e-08	1.10257
GO:0016310	phosphorylation	ROR1	ROR1	receptor tyrosine kinase-like orphan receptor 1	4.20616e-12	2.20739e-08	1.10257
GO:0016310	phosphorylation	NEK1	NEK1	NIMA-related kinase 1	4.20616e-12	2.20739e-08	1.10257
GO:0016310	phosphorylation	NADK	NADK	NAD kinase	4.20616e-12	2.20739e-08	1.10257
GO:0016310	phosphorylation	AC005779.1	MARK4	MAP/microtubule affinity-regulating kinase 4	4.20616e-12	2.20739e-08	1.10257
GO:0016310	phosphorylation	SPRYD3	SPRYD3	SPRY domain containing 3	4.20616e-12	2.20739e-08	1.10257
GO:0016310	phosphorylation	GCKR	GCKR	glucokinase (hexokinase 4) regulator	4.20616e-12	2.20739e-08	1.10257
GO:0016310	phosphorylation	THAP12	PRKRIR	protein-kinase, interferon-inducible double stranded RNA dependent inhibitor, repressor of (P58 repressor)	4.20616e-12	2.20739e-08	1.10257
GO:0016310	phosphorylation	CIT	CIT	citron rho-interacting serine/threonine kinase	4.20616e-12	2.20739e-08	1.10257
GO:0016310	phosphorylation	AP002807.1	CHKA	choline kinase alpha	4.20616e-12	2.20739e-08	1.10257
GO:0016310	phosphorylation	CSNK2A2	CSNK2A2	casein kinase 2, alpha prime polypeptide	4.20616e-12	2.20739e-08	1.10257
GO:0016310	phosphorylation	IPPK	IPPK	inositol 1,3,4,5,6-pentakisphosphate 2-kinase	4.20616e-12	2.20739e-08	1.10257
GO:0016310	phosphorylation	TYK2	TYK2	tyrosine kinase 2	4.20616e-12	2.20739e-08	1.10257
GO:0016310	phosphorylation	TRPM6	TRPM6	transient receptor potential cation channel, subfamily M, member 6	4.20616e-12	2.20739e-08	1.10257
GO:0016310	phosphorylation	MAP3K15	MAP3K15	mitogen-activated protein kinase kinase kinase 15	4.20616e-12	2.20739e-08	1.10257
GO:0016310	phosphorylation	AC139722.1	PRKG2	protein kinase, cGMP-dependent, type II	4.20616e-12	2.20739e-08	1.10257
GO:0016310	phosphorylation	AC008897.3	COL4A3BP	collagen, type IV, alpha 3 (Goodpasture antigen) binding protein	4.20616e-12	2.20739e-08	1.10257
GO:0016310	phosphorylation	MARK1	MARK1	MAP/microtubule affinity-regulating kinase 1	4.20616e-12	2.20739e-08	1.10257
GO:0016310	phosphorylation	AC105235.1	PTK2	protein tyrosine kinase 2	4.20616e-12	2.20739e-08	1.10257
GO:0016310	phosphorylation	DYRK1B	DYRK1B	dual-specificity tyrosine-(Y)-phosphorylation regulated kinase 1B	4.20616e-12	2.20739e-08	1.10257
GO:0016310	phosphorylation	PIP5K1A	PIP5K1A	phosphatidylinositol-4-phosphate 5-kinase, type I, alpha	4.20616e-12	2.20739e-08	1.10257
GO:0016310	phosphorylation	STK11	STK11	serine/threonine kinase 11	4.20616e-12	2.20739e-08	1.10257
GO:0016310	phosphorylation	DYRK4	DYRK4	dual-specificity tyrosine-(Y)-phosphorylation regulated kinase 4	4.20616e-12	2.20739e-08	1.10257
GO:0016310	phosphorylation	AC002091.1	PIK3R5	phosphoinositide-3-kinase, regulatory subunit 5	4.20616e-12	2.20739e-08	1.10257
GO:0016310	phosphorylation	TAB2	TAB2	TGF-beta activated kinase 1/MAP3K7 binding protein 2	4.20616e-12	2.20739e-08	1.10257
GO:0016310	phosphorylation	ETNK1	ETNK1	ethanolamine kinase 1	4.20616e-12	2.20739e-08	1.10257
GO:0016310	phosphorylation	CDK3	CDK3	cyclin-dependent kinase 3	4.20616e-12	2.20739e-08	1.10257
GO:0016310	phosphorylation	GRK6	GRK6	G protein-coupled receptor kinase 6	4.20616e-12	2.20739e-08	1.10257
GO:0016310	phosphorylation	KIT	KIT	v-kit Hardy-Zuckerman 4 feline sarcoma viral oncogene homolog	4.20616e-12	2.20739e-08	1.10257
GO:0016310	phosphorylation	BMX	BMX	BMX non-receptor tyrosine kinase	4.20616e-12	2.20739e-08	1.10257
GO:0016310	phosphorylation	MAP3K19	MAP3K19	mitogen-activated protein kinase kinase kinase 19	4.20616e-12	2.20739e-08	1.10257
GO:0016310	phosphorylation	XYLB	XYLB	xylulokinase homolog (H. influenzae)	4.20616e-12	2.20739e-08	1.10257
GO:0016310	phosphorylation	AP001437.1	DYRK1A	dual-specificity tyrosine-(Y)-phosphorylation regulated kinase 1A	4.20616e-12	2.20739e-08	1.10257
GO:0016310	phosphorylation	AK1	AK1	adenylate kinase 1	4.20616e-12	2.20739e-08	1.10257
GO:0016310	phosphorylation	AP003680.1	PAK1	p21 protein (Cdc42/Rac)-activated kinase 1	4.20616e-12	2.20739e-08	1.10257
GO:0016310	phosphorylation	AC004765.1	WNK1	WNK lysine deficient protein kinase 1	4.20616e-12	2.20739e-08	1.10257
GO:0016310	phosphorylation	EPHA3	EPHA3	EPH receptor A3	4.20616e-12	2.20739e-08	1.10257
GO:0016310	phosphorylation	STK4	STK4	serine/threonine kinase 4	4.20616e-12	2.20739e-08	1.10257
GO:0016310	phosphorylation	NAGK	NAGK	N-acetylglucosamine kinase	4.20616e-12	2.20739e-08	1.10257
GO:0016310	phosphorylation	TKFC	TKFC	dihydroxyacetone kinase 2 homolog (S. cerevisiae)	4.20616e-12	2.20739e-08	1.10257
GO:0016310	phosphorylation	PIK3CB	PIK3CB	phosphatidylinositol-4,5-bisphosphate 3-kinase, catalytic subunit beta	4.20616e-12	2.20739e-08	1.10257
GO:0016310	phosphorylation	TAOK2	TAOK2	TAO kinase 2	4.20616e-12	2.20739e-08	1.10257
GO:0016310	phosphorylation	AC010864.1	RET	ret proto-oncogene	4.20616e-12	2.20739e-08	1.10257
GO:0016310	phosphorylation	SRPK3	SRPK3	SRSF protein kinase 3	4.20616e-12	2.20739e-08	1.10257
GO:0016310	phosphorylation	PCK2	PCK2	phosphoenolpyruvate carboxykinase 2 (mitochondrial)	4.20616e-12	2.20739e-08	1.10257
GO:0016310	phosphorylation	MYLK	MYLK	myosin light chain kinase	4.20616e-12	2.20739e-08	1.10257
GO:0016310	phosphorylation	ROS1	ROS1	ROS proto-oncogene 1 , receptor tyrosine kinase	4.20616e-12	2.20739e-08	1.10257
GO:0016310	phosphorylation	KIDINS220	KIDINS220	kinase D-interacting substrate, 220kDa	4.20616e-12	2.20739e-08	1.10257
GO:0016310	phosphorylation	ZAP70	ZAP70	zeta-chain (TCR) associated protein kinase 70kDa	4.20616e-12	2.20739e-08	1.10257
GO:0016310	phosphorylation	SMG1	SMG1	SMG1 phosphatidylinositol 3-kinase-related kinase	4.20616e-12	2.20739e-08	1.10257
GO:0016310	phosphorylation	CDKL5	CDKL5	cyclin-dependent kinase-like 5	4.20616e-12	2.20739e-08	1.10257
GO:0016310	phosphorylation	LIMK1	LIMK1	LIM domain kinase 1	4.20616e-12	2.20739e-08	1.10257
GO:0016310	phosphorylation	DRC3	EPS8L1	EPS8-like 1	4.20616e-12	2.20739e-08	1.10257
GO:0016310	phosphorylation	CAMKK2	CAMKK2	calcium/calmodulin-dependent protein kinase kinase 2, beta	4.20616e-12	2.20739e-08	1.10257
GO:0016310	phosphorylation	KNDC1	KNDC1	kinase non-catalytic C-lobe domain (KIND) containing 1	4.20616e-12	2.20739e-08	1.10257
GO:0016310	phosphorylation	NEK7	NEK7	NIMA-related kinase 7	4.20616e-12	2.20739e-08	1.10257
GO:0016310	phosphorylation	NRK	NRK	Nik related kinase	4.20616e-12	2.20739e-08	1.10257
GO:0016310	phosphorylation	AK8	AK8	adenylate kinase 8	4.20616e-12	2.20739e-08	1.10257
GO:0016310	phosphorylation	POMK	POMK	protein-O-mannose kinase	4.20616e-12	2.20739e-08	1.10257
GO:0016310	phosphorylation	PIK3C2G	PIK3C2G	phosphatidylinositol-4-phosphate 3-kinase, catalytic subunit type 2 gamma	4.20616e-12	2.20739e-08	1.10257
GO:0016310	phosphorylation	STK25	STK25	serine/threonine kinase 25	4.20616e-12	2.20739e-08	1.10257
GO:0016310	phosphorylation	CDC7	CDC7	cell division cycle 7	4.20616e-12	2.20739e-08	1.10257
GO:0016310	phosphorylation	ROCK2	ROCK2	Rho-associated, coiled-coil containing protein kinase 2	4.20616e-12	2.20739e-08	1.10257
GO:0016310	phosphorylation	AL162427.1	TGFBR1	transforming growth factor, beta receptor 1	4.20616e-12	2.20739e-08	1.10257
GO:0016310	phosphorylation	BMPR1A	BMPR1A	bone morphogenetic protein receptor, type IA	4.20616e-12	2.20739e-08	1.10257
GO:0016310	phosphorylation	AC009245.1	DGKI	diacylglycerol kinase, iota	4.20616e-12	2.20739e-08	1.10257
GO:0016310	phosphorylation	AC005920.3	SPAG9	sperm associated antigen 9	4.20616e-12	2.20739e-08	1.10257
GO:0016310	phosphorylation	PIP4K2B	PIP4K2B	phosphatidylinositol-5-phosphate 4-kinase, type II, beta	4.20616e-12	2.20739e-08	1.10257
GO:0016310	phosphorylation	AC093627.1	FAM20C	family with sequence similarity 20, member C	4.20616e-12	2.20739e-08	1.10257
GO:0016310	phosphorylation	MAP3K13	MAP3K13	mitogen-activated protein kinase kinase kinase 13	4.20616e-12	2.20739e-08	1.10257
GO:0016310	phosphorylation	SGK494	SGK494	uncharacterized serine/threonine-protein kinase SgK494	4.20616e-12	2.20739e-08	1.10257
GO:0016310	phosphorylation	SBK1	SBK1	SH3 domain binding kinase 1	4.20616e-12	2.20739e-08	1.10257
GO:0016310	phosphorylation	PANK4	PANK4	pantothenate kinase 4	4.20616e-12	2.20739e-08	1.10257
GO:0016310	phosphorylation	HIPK2	HIPK2	homeodomain interacting protein kinase 2	4.20616e-12	2.20739e-08	1.10257
GO:0016310	phosphorylation	TTN	TTN	titin	4.20616e-12	2.20739e-08	1.10257
GO:0016310	phosphorylation	RIPK4	RIPK4	receptor-interacting serine-threonine kinase 4	4.20616e-12	2.20739e-08	1.10257
GO:0016310	phosphorylation	IKBKE	IKBKE	inhibitor of kappa light polypeptide gene enhancer in B-cells, kinase epsilon	4.20616e-12	2.20739e-08	1.10257
GO:0016310	phosphorylation	SPHK2	SPHK2	sphingosine kinase 2	4.20616e-12	2.20739e-08	1.10257
GO:0016310	phosphorylation	CERK	CERK	ceramide kinase	4.20616e-12	2.20739e-08	1.10257
GO:0016310	phosphorylation	CAMK2D	CAMK2D	calcium/calmodulin-dependent protein kinase II delta	4.20616e-12	2.20739e-08	1.10257
GO:0016310	phosphorylation	PIK3R6	PIK3R6	phosphoinositide-3-kinase, regulatory subunit 6	4.20616e-12	2.20739e-08	1.10257
GO:0016310	phosphorylation	AC091196.1	BRSK2	BR serine/threonine kinase 2	4.20616e-12	2.20739e-08	1.10257
GO:0016310	phosphorylation	PRKRA	PRKRA	protein kinase, interferon-inducible double stranded RNA dependent activator	4.20616e-12	2.20739e-08	1.10257
GO:0016310	phosphorylation	DGKA	DGKA	diacylglycerol kinase, alpha 80kDa	4.20616e-12	2.20739e-08	1.10257
GO:0016310	phosphorylation	PAK6	PAK6	p21 protein (Cdc42/Rac)-activated kinase 6	4.20616e-12	2.20739e-08	1.10257
GO:0016310	phosphorylation	AC122714.2	FLT4	fms-related tyrosine kinase 4	4.20616e-12	2.20739e-08	1.10257
GO:0016310	phosphorylation	PRKDC	PRKDC	protein kinase, DNA-activated, catalytic polypeptide	4.20616e-12	2.20739e-08	1.10257
GO:0016310	phosphorylation	ACVR1	ACVR1	activin A receptor, type I	4.20616e-12	2.20739e-08	1.10257
GO:0016310	phosphorylation	AC007225.2	MYLK3	myosin light chain kinase 3	4.20616e-12	2.20739e-08	1.10257
GO:0016310	phosphorylation	IP6K3	IP6K3	inositol hexakisphosphate kinase 3	4.20616e-12	2.20739e-08	1.10257
GO:0016310	phosphorylation	MAPK8IP1	MAPK8IP1	mitogen-activated protein kinase 8 interacting protein 1	4.20616e-12	2.20739e-08	1.10257
GO:0016310	phosphorylation	SPEG	SPEG	SPEG complex locus	4.20616e-12	2.20739e-08	1.10257
GO:0016310	phosphorylation	PKN2	PKN2	protein kinase N2	4.20616e-12	2.20739e-08	1.10257
GO:0016310	phosphorylation	NME4	NME4	NME/NM23 nucleoside diphosphate kinase 4	4.20616e-12	2.20739e-08	1.10257
GO:0016310	phosphorylation	MAPK10	MAPK10	mitogen-activated protein kinase 10	4.20616e-12	2.20739e-08	1.10257
GO:0016310	phosphorylation	AL358075.4	MAST2	microtubule associated serine/threonine kinase 2	4.20616e-12	2.20739e-08	1.10257
GO:0016310	phosphorylation	CLK4	CLK4	CDC-like kinase 4	4.20616e-12	2.20739e-08	1.10257
GO:0016310	phosphorylation	PKLR	PKLR	pyruvate kinase, liver and RBC	4.20616e-12	2.20739e-08	1.10257
GO:0016310	phosphorylation	MASTL	MASTL	microtubule associated serine/threonine kinase-like	4.20616e-12	2.20739e-08	1.10257
GO:0016310	phosphorylation	GRK7	GRK7	G protein-coupled receptor kinase 7	4.20616e-12	2.20739e-08	1.10257
GO:0016310	phosphorylation	CMPK2	CMPK2	cytidine monophosphate (UMP-CMP) kinase 2, mitochondrial	4.20616e-12	2.20739e-08	1.10257
GO:0016310	phosphorylation	PRKCSH	PRKCSH	protein kinase C substrate 80K-H	4.20616e-12	2.20739e-08	1.10257
GO:0016310	phosphorylation	AC093424.1	FGGY	FGGY carbohydrate kinase domain containing	4.20616e-12	2.20739e-08	1.10257
GO:0016310	phosphorylation	DMPK	DMPK	dystrophia myotonica-protein kinase	4.20616e-12	2.20739e-08	1.10257
GO:0016310	phosphorylation	AC005785.1	AKAP8	A kinase (PRKA) anchor protein 8	4.20616e-12	2.20739e-08	1.10257
GO:0016310	phosphorylation	CAMK1D	CAMK1D	calcium/calmodulin-dependent protein kinase ID	4.20616e-12	2.20739e-08	1.10257
GO:0016310	phosphorylation	HMGXB3	HMGXB3	HMG box domain containing 3	4.20616e-12	2.20739e-08	1.10257
GO:0016310	phosphorylation	MYLK2	MYLK2	myosin light chain kinase 2	4.20616e-12	2.20739e-08	1.10257
GO:0016310	phosphorylation	PSKH1	PSKH1	protein serine kinase H1	4.20616e-12	2.20739e-08	1.10257
GO:0016310	phosphorylation	PKIA	PKIA	protein kinase (cAMP-dependent, catalytic) inhibitor alpha	4.20616e-12	2.20739e-08	1.10257
GO:0016310	phosphorylation	ARAF	ARAF	A-Raf proto-oncogene, serine/threonine kinase	4.20616e-12	2.20739e-08	1.10257
GO:0016310	phosphorylation	AL138878.1	RIOK1	RIO kinase 1	4.20616e-12	2.20739e-08	1.10257
GO:0016310	phosphorylation	SGK3	SGK3	serum/glucocorticoid regulated kinase family, member 3	4.20616e-12	2.20739e-08	1.10257
GO:0016310	phosphorylation	AL139393.2	MAP3K4	mitogen-activated protein kinase kinase kinase 4	4.20616e-12	2.20739e-08	1.10257
GO:0016310	phosphorylation	DGKK	DGKK	diacylglycerol kinase, kappa	4.20616e-12	2.20739e-08	1.10257
GO:0016310	phosphorylation	AC098818.2	BMP2K	BMP2 inducible kinase	4.20616e-12	2.20739e-08	1.10257
GO:0016310	phosphorylation	PIK3CA	PIK3CA	phosphatidylinositol-4,5-bisphosphate 3-kinase, catalytic subunit alpha	4.20616e-12	2.20739e-08	1.10257
GO:0016310	phosphorylation	CSNK1G2	CSNK1G2	casein kinase 1, gamma 2	4.20616e-12	2.20739e-08	1.10257
GO:0016310	phosphorylation	ILKAP	ILKAP	integrin-linked kinase-associated serine/threonine phosphatase	4.20616e-12	2.20739e-08	1.10257
GO:0016310	phosphorylation	BUB1B	BUB1B	BUB1 mitotic checkpoint serine/threonine kinase B	4.20616e-12	2.20739e-08	1.10257
GO:0016310	phosphorylation	RPS6KA5	RPS6KA5	ribosomal protein S6 kinase, 90kDa, polypeptide 5	4.20616e-12	2.20739e-08	1.10257
GO:0016310	phosphorylation	CDK13	CDK13	cyclin-dependent kinase 13	4.20616e-12	2.20739e-08	1.10257
GO:0016310	phosphorylation	DGKD	DGKD	diacylglycerol kinase, delta 130kDa	4.20616e-12	2.20739e-08	1.10257
GO:0016310	phosphorylation	PLK3	PLK3	polo-like kinase 3	4.20616e-12	2.20739e-08	1.10257
GO:0016310	phosphorylation	TESK2	TESK2	testis-specific kinase 2	4.20616e-12	2.20739e-08	1.10257
GO:0016310	phosphorylation	ALPK2	ALPK2	alpha-kinase 2	4.20616e-12	2.20739e-08	1.10257
GO:0016310	phosphorylation	CINP	CINP	cyclin-dependent kinase 2 interacting protein	4.20616e-12	2.20739e-08	1.10257
GO:0016310	phosphorylation	AK2	AK2	adenylate kinase 2	4.20616e-12	2.20739e-08	1.10257
GO:0016310	phosphorylation	GRK4	GRK4	G protein-coupled receptor kinase 4	4.20616e-12	2.20739e-08	1.10257
GO:0016310	phosphorylation	MARK2	MARK2	MAP/microtubule affinity-regulating kinase 2	4.20616e-12	2.20739e-08	1.10257
GO:0016310	phosphorylation	AATK	AATK	apoptosis-associated tyrosine kinase	4.20616e-12	2.20739e-08	1.10257
GO:0016310	phosphorylation	PANK3	PANK3	pantothenate kinase 3	4.20616e-12	2.20739e-08	1.10257
GO:0016310	phosphorylation	PPIP5K2	PPIP5K2	diphosphoinositol pentakisphosphate kinase 2	4.20616e-12	2.20739e-08	1.10257
GO:0016310	phosphorylation	ITPKB	ITPKB	inositol-trisphosphate 3-kinase B	4.20616e-12	2.20739e-08	1.10257
GO:0016310	phosphorylation	AC092349.1	MAST4	microtubule associated serine/threonine kinase family member 4	4.20616e-12	2.20739e-08	1.10257
GO:0016310	phosphorylation	TRPM7	TRPM7	transient receptor potential cation channel, subfamily M, member 7	4.20616e-12	2.20739e-08	1.10257
GO:0016310	phosphorylation	AC079834.2	EPHA4	EPH receptor A4	4.20616e-12	2.20739e-08	1.10257
GO:0016310	phosphorylation	STK11IP	STK11IP	serine/threonine kinase 11 interacting protein	4.20616e-12	2.20739e-08	1.10257
GO:0016310	phosphorylation	AP003467.2	STK3	serine/threonine kinase 3	4.20616e-12	2.20739e-08	1.10257
GO:0016310	phosphorylation	PRPS1	PRPS1	phosphoribosyl pyrophosphate synthetase 1	4.20616e-12	2.20739e-08	1.10257
GO:0016310	phosphorylation	AC141586.3	PDPK1	3-phosphoinositide dependent protein kinase 1	4.20616e-12	2.20739e-08	1.10257
GO:0016310	phosphorylation	TTK	TTK	TTK protein kinase	4.20616e-12	2.20739e-08	1.10257
GO:0016310	phosphorylation	CHEK1	CHEK1	checkpoint kinase 1	4.20616e-12	2.20739e-08	1.10257
GO:0016310	phosphorylation	AL596223.1	HKDC1	hexokinase domain containing 1	4.20616e-12	2.20739e-08	1.10257
GO:0016310	phosphorylation	ADK	ADK	adenosine kinase	4.20616e-12	2.20739e-08	1.10257
GO:0016310	phosphorylation	CDK19	CDK19	cyclin-dependent kinase 19	4.20616e-12	2.20739e-08	1.10257
GO:0016310	phosphorylation	PKIG	PKIG	protein kinase (cAMP-dependent, catalytic) inhibitor gamma	4.20616e-12	2.20739e-08	1.10257
GO:0016310	phosphorylation	EPHA10	EPHA10	EPH receptor A10	4.20616e-12	2.20739e-08	1.10257
GO:0016310	phosphorylation	EIF2AK1	EIF2AK1	eukaryotic translation initiation factor 2-alpha kinase 1	4.20616e-12	2.20739e-08	1.10257
GO:0016310	phosphorylation	PXK	PXK	PX domain containing serine/threonine kinase	4.20616e-12	2.20739e-08	1.10257
GO:0016310	phosphorylation	CALM2	CALM2	calmodulin 2 (phosphorylase kinase, delta)	4.20616e-12	2.20739e-08	1.10257
GO:0016310	phosphorylation	PACSIN3	PACSIN3	protein kinase C and casein kinase substrate in neurons 3	4.20616e-12	2.20739e-08	1.10257
GO:0016310	phosphorylation	CDK5	CDK5	cyclin-dependent kinase 5	4.20616e-12	2.20739e-08	1.10257
GO:0016310	phosphorylation	AL157395.1	PFKFB3	6-phosphofructo-2-kinase/fructose-2,6-biphosphatase 3	4.20616e-12	2.20739e-08	1.10257
GO:0016310	phosphorylation	NEK6	NEK6	NIMA-related kinase 6	4.20616e-12	2.20739e-08	1.10257
GO:0016310	phosphorylation	MAP3K11	MAP3K11	mitogen-activated protein kinase kinase kinase 11	4.20616e-12	2.20739e-08	1.10257
GO:0016310	phosphorylation	NEK5	NEK5	NIMA-related kinase 5	4.20616e-12	2.20739e-08	1.10257
GO:0016310	phosphorylation	AC134772.1	PFKFB4	6-phosphofructo-2-kinase/fructose-2,6-biphosphatase 4	4.20616e-12	2.20739e-08	1.10257
GO:0016310	phosphorylation	LMTK2	LMTK2	lemur tyrosine kinase 2	4.20616e-12	2.20739e-08	1.10257
GO:0016310	phosphorylation	AL137145.1	PRKCQ	protein kinase C, theta	4.20616e-12	2.20739e-08	1.10257
GO:0016310	phosphorylation	AC013452.2	GALK2	galactokinase 2	4.20616e-12	2.20739e-08	1.10257
GO:0016310	phosphorylation	CDK4	CDK4	cyclin-dependent kinase 4	4.20616e-12	2.20739e-08	1.10257
GO:0016310	phosphorylation	AC114947.1	NIM1K	NIM1 serine/threonine protein kinase	4.20616e-12	2.20739e-08	1.10257
GO:0016310	phosphorylation	CAMK2G	CAMK2G	calcium/calmodulin-dependent protein kinase II gamma	4.20616e-12	2.20739e-08	1.10257
GO:0016310	phosphorylation	SPHK1	SPHK1	sphingosine kinase 1	4.20616e-12	2.20739e-08	1.10257
GO:0016310	phosphorylation	OXSR1	OXSR1	oxidative stress responsive 1	4.20616e-12	2.20739e-08	1.10257
GO:0016310	phosphorylation	CDC42BPG	CDC42BPG	CDC42 binding protein kinase gamma (DMPK-like)	4.20616e-12	2.20739e-08	1.10257
GO:0016310	phosphorylation	PFKFB2	PFKFB2	6-phosphofructo-2-kinase/fructose-2,6-biphosphatase 2	4.20616e-12	2.20739e-08	1.10257
GO:0016310	phosphorylation	AC104046.1	AKAP13	A kinase (PRKA) anchor protein 13	4.20616e-12	2.20739e-08	1.10257
GO:0016310	phosphorylation	AC004233.4	PKMYT1	protein kinase, membrane associated tyrosine/threonine 1	4.20616e-12	2.20739e-08	1.10257
GO:0016310	phosphorylation	PAK2	PAK2	p21 protein (Cdc42/Rac)-activated kinase 2	4.20616e-12	2.20739e-08	1.10257
GO:0016310	phosphorylation	ITPKA	ITPKA	inositol-trisphosphate 3-kinase A	4.20616e-12	2.20739e-08	1.10257
GO:0016310	phosphorylation	STAT3	STAT3	signal transducer and activator of transcription 3 (acute-phase response factor)	4.20616e-12	2.20739e-08	1.10257
GO:0016310	phosphorylation	STK16	STK16	serine/threonine kinase 16	4.20616e-12	2.20739e-08	1.10257
GO:0016310	phosphorylation	AC008610.1	MAPK9	mitogen-activated protein kinase 9	4.20616e-12	2.20739e-08	1.10257
GO:0016310	phosphorylation	AL024508.1	MAP3K5	mitogen-activated protein kinase kinase kinase 5	4.20616e-12	2.20739e-08	1.10257
GO:0016310	phosphorylation	TOP1	TOP1	topoisomerase (DNA) I	4.20616e-12	2.20739e-08	1.10257
GO:0016310	phosphorylation	MAPK11	MAPK11	mitogen-activated protein kinase 11	4.20616e-12	2.20739e-08	1.10257
GO:0016310	phosphorylation	IDNK	IDNK	idnK, gluconokinase homolog (E. coli)	4.20616e-12	2.20739e-08	1.10257
GO:0016310	phosphorylation	WEE1	WEE1	WEE1 G2 checkpoint kinase	4.20616e-12	2.20739e-08	1.10257
GO:0016310	phosphorylation	PDK4	PDK4	pyruvate dehydrogenase kinase, isozyme 4	4.20616e-12	2.20739e-08	1.10257
GO:0016310	phosphorylation	PKM	PKM	pyruvate kinase, muscle	4.20616e-12	2.20739e-08	1.10257
GO:0016310	phosphorylation	AC005777.1	MATK	megakaryocyte-associated tyrosine kinase	4.20616e-12	2.20739e-08	1.10257
GO:0016310	phosphorylation	CCNE1	CCNE1	cyclin E1	4.20616e-12	2.20739e-08	1.10257
GO:0016310	phosphorylation	PFKL	PFKL	phosphofructokinase, liver	4.20616e-12	2.20739e-08	1.10257
GO:0016310	phosphorylation	CHEK2	CHEK2	checkpoint kinase 2	4.20616e-12	2.20739e-08	1.10257
GO:0016310	phosphorylation	AC090907.1	LRRK1	leucine-rich repeat kinase 1	4.20616e-12	2.20739e-08	1.10257
GO:0016310	phosphorylation	PRKCZ	PRKCZ	protein kinase C, zeta	4.20616e-12	2.20739e-08	1.10257
GO:0016310	phosphorylation	STK32C	STK32C	serine/threonine kinase 32C	4.20616e-12	2.20739e-08	1.10257
GO:0016310	phosphorylation	AL606489.2	PIK3C2B	phosphatidylinositol-4-phosphate 3-kinase, catalytic subunit type 2 beta	4.20616e-12	2.20739e-08	1.10257
GO:0016310	phosphorylation	CDK6	CDK6	cyclin-dependent kinase 6	4.20616e-12	2.20739e-08	1.10257
GO:0016310	phosphorylation	AC093158.1	TNNI3K	TNNI3 interacting kinase	4.20616e-12	2.20739e-08	1.10257
GO:0016310	phosphorylation	PIP5K1C	PIP5K1C	phosphatidylinositol-4-phosphate 5-kinase, type I, gamma	4.20616e-12	2.20739e-08	1.10257
GO:0016310	phosphorylation	TSSK2	TSSK2	testis-specific serine kinase 2	4.20616e-12	2.20739e-08	1.10257
GO:0016310	phosphorylation	DCLK3	DCLK3	doublecortin-like kinase 3	4.20616e-12	2.20739e-08	1.10257
GO:0016310	phosphorylation	PHKA2	PHKA2	phosphorylase kinase, alpha 2 (liver)	4.20616e-12	2.20739e-08	1.10257
GO:0016310	phosphorylation	BRAF	BRAF	B-Raf proto-oncogene, serine/threonine kinase	4.20616e-12	2.20739e-08	1.10257
GO:0016310	phosphorylation	SBK2	SBK2	SH3 domain binding kinase family, member 2	4.20616e-12	2.20739e-08	1.10257
GO:0016310	phosphorylation	PICK1	PICK1	protein interacting with PRKCA 1	4.20616e-12	2.20739e-08	1.10257
GO:0016310	phosphorylation	RIPK3	RIPK3	receptor-interacting serine-threonine kinase 3	4.20616e-12	2.20739e-08	1.10257
GO:0016310	phosphorylation	AC008269.2	FASTKD2	FAST kinase domains 2	4.20616e-12	2.20739e-08	1.10257
GO:0016310	phosphorylation	CDKL3	CDKL3	cyclin-dependent kinase-like 3	4.20616e-12	2.20739e-08	1.10257
GO:0016310	phosphorylation	PLAUR	PLAUR	plasminogen activator, urokinase receptor	4.20616e-12	2.20739e-08	1.10257
[truncated: 3,512 more rows]
