# Supplementary material for: Targeting p300/CBP Attenuates Hepatocellular Carcinoma Progression through Epigenetic Regulation of Metabolism
Source: Oxford University Press journal article supplement (doi:10.1158/0008-5472.can-20-1323), 2020-12-23
Supplement: 00085472can201323-sup-241667_3_supp_6772397_ql0jn1.xlsx [file 00085472can201323-sup-241667_3_supp_6772397_ql0jn1.xlsx]

## Sheet: AllPathway_Result
PathwayID	PathwayTerm	DifGene	AllDifGene	GeneInPathway	AllGene	P-Value	FDR	Enrichment	(-log10P)
PATH:01100	Metabolic pathways	61	209	1144	6533	1.63262e-05	0.0037387	1.66675	4.78711
PATH:04976	Bile secretion	10	209	72	6533	8.57471e-05	0.00981805	4.34144	4.06678
PATH:04610	Complement and coagulation cascades	8	209	69	6533	0.00149852	0.100207	3.62416	2.82434
PATH:01230	Biosynthesis of amino acids	8	209	73	6533	0.00216005	0.100207	3.42558	2.66554
PATH:00360	Phenylalanine metabolism	4	209	18	6533	0.00218792	0.100207	6.94631	2.65997
PATH:01212	Fatty acid metabolism	6	209	48	6533	0.00398782	0.152202	3.9073	2.39926
PATH:04977	Vitamin digestion and absorption	4	209	24	6533	0.00653879	0.179713	5.20973	2.1845
PATH:03320	PPAR signaling pathway	7	209	71	6533	0.00727692	0.179713	3.08181	2.13805
PATH:00260	Glycine, serine and threonine metabolism	5	209	39	6533	0.00758522	0.179713	4.00748	2.12003
PATH:04918	Thyroid hormone synthesis	7	209	72	6533	0.00784774	0.179713	3.03901	2.10526
PATH:00350	Tyrosine metabolism	5	209	41	6533	0.00937765	0.195226	3.812	2.02791
PATH:02010	ABC transporters	5	209	44	6533	0.0125824	0.237637	3.55209	1.90024
PATH:00061	Fatty acid biosynthesis	2	209	6	6533	0.0140342	0.237637	10.4195	1.85281
PATH:00340	Histidine metabolism	4	209	30	6533	0.0145281	0.237637	4.16778	1.83779

## Sheet: AllPathway2Gene
PathwayID	PathwayTerm	QueryID	Symbol	Description	P-Value	FDR	Enrichment
PATH:01100	Metabolic pathways	PNPLA3	PNPLA3	patatin-like phospholipase domain containing 3	1.63262e-05	0.0037387	1.66675
PATH:01100	Metabolic pathways	ACACA	ACACA	acetyl-CoA carboxylase alpha	1.63262e-05	0.0037387	1.66675
PATH:01100	Metabolic pathways	ENPP7	ENPP7	ectonucleotide pyrophosphatase/phosphodiesterase 7	1.63262e-05	0.0037387	1.66675
PATH:01100	Metabolic pathways	GBA3	GBA3	glucosidase, beta, acid 3 (gene/pseudogene)	1.63262e-05	0.0037387	1.66675
PATH:01100	Metabolic pathways	DPYD	DPYD	dihydropyrimidine dehydrogenase	1.63262e-05	0.0037387	1.66675
PATH:01100	Metabolic pathways	FASN	FASN	fatty acid synthase	1.63262e-05	0.0037387	1.66675
PATH:01100	Metabolic pathways	ADH6	ADH6	alcohol dehydrogenase 6 (class V)	1.63262e-05	0.0037387	1.66675
PATH:01100	Metabolic pathways	GCLC	GCLC	glutamate-cysteine ligase, catalytic subunit	1.63262e-05	0.0037387	1.66675
PATH:01100	Metabolic pathways	SEPHS2	SEPHS2	selenophosphate synthetase 2	1.63262e-05	0.0037387	1.66675
PATH:01100	Metabolic pathways	CERS4	CERS4	ceramide synthase 4	1.63262e-05	0.0037387	1.66675
PATH:01100	Metabolic pathways	GPAM	GPAM	glycerol-3-phosphate acyltransferase, mitochondrial	1.63262e-05	0.0037387	1.66675
PATH:01100	Metabolic pathways	DTYMK	DTYMK	deoxythymidylate kinase (thymidylate kinase)	1.63262e-05	0.0037387	1.66675
PATH:01100	Metabolic pathways	ALDH18A1	ALDH18A1	aldehyde dehydrogenase 18 family, member A1	1.63262e-05	0.0037387	1.66675
PATH:01100	Metabolic pathways	ALAD	ALAD	aminolevulinate dehydratase	1.63262e-05	0.0037387	1.66675
PATH:01100	Metabolic pathways	CTPS1	CTPS1	CTP synthase 1	1.63262e-05	0.0037387	1.66675
PATH:01100	Metabolic pathways	KYNU	KYNU	kynureninase	1.63262e-05	0.0037387	1.66675
PATH:01100	Metabolic pathways	GCH1	GCH1	GTP cyclohydrolase 1	1.63262e-05	0.0037387	1.66675
PATH:01100	Metabolic pathways	NSDHL	NSDHL	NAD(P) dependent steroid dehydrogenase-like	1.63262e-05	0.0037387	1.66675
PATH:01100	Metabolic pathways	ACSL5	ACSL5	acyl-CoA synthetase long-chain family member 5	1.63262e-05	0.0037387	1.66675
PATH:01100	Metabolic pathways	B4GALNT1	B4GALNT1	beta-1,4-N-acetyl-galactosaminyl transferase 1	1.63262e-05	0.0037387	1.66675
PATH:01100	Metabolic pathways	AGPAT2	AGPAT2	1-acylglycerol-3-phosphate O-acyltransferase 2	1.63262e-05	0.0037387	1.66675
PATH:01100	Metabolic pathways	HIBADH	HIBADH	3-hydroxyisobutyrate dehydrogenase	1.63262e-05	0.0037387	1.66675
PATH:01100	Metabolic pathways	CYP2B6	CYP2B6	cytochrome P450, family 2, subfamily B, polypeptide 6	1.63262e-05	0.0037387	1.66675
PATH:01100	Metabolic pathways	DLST	DLST	dihydrolipoamide S-succinyltransferase (E2 component of 2-oxo-glutarate complex)	1.63262e-05	0.0037387	1.66675
PATH:01100	Metabolic pathways	MAOA	MAOA	monoamine oxidase A	1.63262e-05	0.0037387	1.66675
PATH:01100	Metabolic pathways	HSD17B2	HSD17B2	hydroxysteroid (17-beta) dehydrogenase 2	1.63262e-05	0.0037387	1.66675
PATH:01100	Metabolic pathways	HGD	HGD	homogentisate 1,2-dioxygenase	1.63262e-05	0.0037387	1.66675
PATH:01100	Metabolic pathways	SARDH	SARDH	sarcosine dehydrogenase	1.63262e-05	0.0037387	1.66675
PATH:01100	Metabolic pathways	SPTLC3	SPTLC3	serine palmitoyltransferase, long chain base subunit 3	1.63262e-05	0.0037387	1.66675
PATH:01100	Metabolic pathways	MAT1A	MAT1A	methionine adenosyltransferase I, alpha	1.63262e-05	0.0037387	1.66675
PATH:01100	Metabolic pathways	PSAT1	PSAT1	phosphoserine aminotransferase 1	1.63262e-05	0.0037387	1.66675
PATH:01100	Metabolic pathways	EPHX2	EPHX2	epoxide hydrolase 2, cytoplasmic	1.63262e-05	0.0037387	1.66675
PATH:01100	Metabolic pathways	LIPC	LIPC	lipase, hepatic	1.63262e-05	0.0037387	1.66675
PATH:01100	Metabolic pathways	PIPOX	PIPOX	pipecolic acid oxidase	1.63262e-05	0.0037387	1.66675
PATH:01100	Metabolic pathways	ACOX2	ACOX2	acyl-CoA oxidase 2, branched chain	1.63262e-05	0.0037387	1.66675
PATH:01100	Metabolic pathways	IMPDH2	IMPDH2	IMP (inosine 5'-monophosphate) dehydrogenase 2	1.63262e-05	0.0037387	1.66675
PATH:01100	Metabolic pathways	NDUFA10	NDUFA10	NADH dehydrogenase (ubiquinone) 1 alpha subcomplex, 10, 42kDa	1.63262e-05	0.0037387	1.66675
PATH:01100	Metabolic pathways	GNPDA1	GNPDA1	glucosamine-6-phosphate deaminase 1	1.63262e-05	0.0037387	1.66675
PATH:01100	Metabolic pathways	PNP	PNP	purine nucleoside phosphorylase	1.63262e-05	0.0037387	1.66675
PATH:01100	Metabolic pathways	ASS1	ASS1	argininosuccinate synthase 1	1.63262e-05	0.0037387	1.66675
PATH:01100	Metabolic pathways	GDA	GDA	guanine deaminase	1.63262e-05	0.0037387	1.66675
PATH:01100	Metabolic pathways	UROC1	UROC1	urocanate hydratase 1	1.63262e-05	0.0037387	1.66675
PATH:01100	Metabolic pathways	NTPCR	NTPCR	nucleoside-triphosphatase, cancer-related	1.63262e-05	0.0037387	1.66675
PATH:01100	Metabolic pathways	MGLL	MGLL	monoglyceride lipase	1.63262e-05	0.0037387	1.66675
PATH:01100	Metabolic pathways	ACAA1	ACAA1	acetyl-CoA acyltransferase 1	1.63262e-05	0.0037387	1.66675
PATH:01100	Metabolic pathways	ATIC	ATIC	5-aminoimidazole-4-carboxamide ribonucleotide formyltransferase/IMP cyclohydrolase	1.63262e-05	0.0037387	1.66675
PATH:01100	Metabolic pathways	ARG1	ARG1	arginase 1	1.63262e-05	0.0037387	1.66675
PATH:01100	Metabolic pathways	CYP2J2	CYP2J2	cytochrome P450, family 2, subfamily J, polypeptide 2	1.63262e-05	0.0037387	1.66675
PATH:01100	Metabolic pathways	ALDH3B1	ALDH3B1	aldehyde dehydrogenase 3 family, member B1	1.63262e-05	0.0037387	1.66675
PATH:01100	Metabolic pathways	ACMSD	ACMSD	aminocarboxymuconate semialdehyde decarboxylase	1.63262e-05	0.0037387	1.66675
PATH:01100	Metabolic pathways	ACSL4	ACSL4	acyl-CoA synthetase long-chain family member 4	1.63262e-05	0.0037387	1.66675
PATH:01100	Metabolic pathways	PSPH	PSPH	phosphoserine phosphatase	1.63262e-05	0.0037387	1.66675
PATH:01100	Metabolic pathways	QDPR	QDPR	quinoid dihydropteridine reductase	1.63262e-05	0.0037387	1.66675
PATH:01100	Metabolic pathways	DDC	DDC	dopa decarboxylase (aromatic L-amino acid decarboxylase)	1.63262e-05	0.0037387	1.66675
PATH:01100	Metabolic pathways	GPI	GPI	glucose-6-phosphate isomerase	1.63262e-05	0.0037387	1.66675
PATH:01100	Metabolic pathways	CYP4F3	CYP4F3	cytochrome P450, family 4, subfamily F, polypeptide 3	1.63262e-05	0.0037387	1.66675
PATH:01100	Metabolic pathways	PLCE1	PLCE1	phospholipase C, epsilon 1	1.63262e-05	0.0037387	1.66675
PATH:01100	Metabolic pathways	PAH	PAH	phenylalanine hydroxylase	1.63262e-05	0.0037387	1.66675
PATH:01100	Metabolic pathways	C1GALT1	C1GALT1	core 1 synthase, glycoprotein-N-acetylgalactosamine 3-beta-galactosyltransferase 1	1.63262e-05	0.0037387	1.66675
PATH:01100	Metabolic pathways	SPHK1	SPHK1	sphingosine kinase 1	1.63262e-05	0.0037387	1.66675
PATH:01100	Metabolic pathways	TALDO1	TALDO1	transaldolase 1	1.63262e-05	0.0037387	1.66675
PATH:04976	Bile secretion	ATP1A1	ATP1A1	ATPase, Na+/K+ transporting, alpha 1 polypeptide	8.57471e-05	0.00981805	4.34144
PATH:04976	Bile secretion	ADCY9	ADCY9	adenylate cyclase 9	8.57471e-05	0.00981805	4.34144
PATH:04976	Bile secretion	ABCB1	ABCB1	ATP-binding cassette, sub-family B (MDR/TAP), member 1	8.57471e-05	0.00981805	4.34144
PATH:04976	Bile secretion	SLC22A7	SLC22A7	solute carrier family 22 (organic anion transporter), member 7	8.57471e-05	0.00981805	4.34144
PATH:04976	Bile secretion	ADCY5	ADCY5	adenylate cyclase 5	8.57471e-05	0.00981805	4.34144
PATH:04976	Bile secretion	SLCO1B1	SLCO1B1	solute carrier organic anion transporter family, member 1B1	8.57471e-05	0.00981805	4.34144
PATH:04976	Bile secretion	SLCO1B3	SLCO1B3	solute carrier organic anion transporter family, member 1B3	8.57471e-05	0.00981805	4.34144
PATH:04976	Bile secretion	ABCG2	ABCG2	ATP-binding cassette, sub-family G (WHITE), member 2 (Junior blood group)	8.57471e-05	0.00981805	4.34144
PATH:04976	Bile secretion	ABCC2	ABCC2	ATP-binding cassette, sub-family C (CFTR/MRP), member 2	8.57471e-05	0.00981805	4.34144
PATH:04976	Bile secretion	SULT2A1	SULT2A1	sulfotransferase family, cytosolic, 2A, dehydroepiandrosterone (DHEA)-preferring, member 1	8.57471e-05	0.00981805	4.34144
PATH:04610	Complement and coagulation cascades	C3	C3	complement component 3	0.00149852	0.100207	3.62416
PATH:04610	Complement and coagulation cascades	SERPINC1	SERPINC1	serpin peptidase inhibitor, clade C (antithrombin), member 1	0.00149852	0.100207	3.62416
PATH:04610	Complement and coagulation cascades	C6	C6	complement component 6	0.00149852	0.100207	3.62416
PATH:04610	Complement and coagulation cascades	F12	F12	coagulation factor XII (Hageman factor)	0.00149852	0.100207	3.62416
PATH:04610	Complement and coagulation cascades	F13B	F13B	coagulation factor XIII, B polypeptide	0.00149852	0.100207	3.62416
PATH:04610	Complement and coagulation cascades	C8A	C8A	complement component 8, alpha polypeptide	0.00149852	0.100207	3.62416
PATH:04610	Complement and coagulation cascades	C5	C5	complement component 5	0.00149852	0.100207	3.62416
PATH:04610	Complement and coagulation cascades	SERPING1	SERPING1	serpin peptidase inhibitor, clade G (C1 inhibitor), member 1	0.00149852	0.100207	3.62416
PATH:01230	Biosynthesis of amino acids	ALDH18A1	ALDH18A1	aldehyde dehydrogenase 18 family, member A1	0.00216005	0.100207	3.42558
PATH:01230	Biosynthesis of amino acids	MAT1A	MAT1A	methionine adenosyltransferase I, alpha	0.00216005	0.100207	3.42558
PATH:01230	Biosynthesis of amino acids	PSAT1	PSAT1	phosphoserine aminotransferase 1	0.00216005	0.100207	3.42558
PATH:01230	Biosynthesis of amino acids	ASS1	ASS1	argininosuccinate synthase 1	0.00216005	0.100207	3.42558
PATH:01230	Biosynthesis of amino acids	ARG1	ARG1	arginase 1	0.00216005	0.100207	3.42558
PATH:01230	Biosynthesis of amino acids	PSPH	PSPH	phosphoserine phosphatase	0.00216005	0.100207	3.42558
PATH:01230	Biosynthesis of amino acids	PAH	PAH	phenylalanine hydroxylase	0.00216005	0.100207	3.42558
PATH:01230	Biosynthesis of amino acids	TALDO1	TALDO1	transaldolase 1	0.00216005	0.100207	3.42558
PATH:00360	Phenylalanine metabolism	MAOA	MAOA	monoamine oxidase A	0.00218792	0.100207	6.94631
PATH:00360	Phenylalanine metabolism	ALDH3B1	ALDH3B1	aldehyde dehydrogenase 3 family, member B1	0.00218792	0.100207	6.94631
PATH:00360	Phenylalanine metabolism	DDC	DDC	dopa decarboxylase (aromatic L-amino acid decarboxylase)	0.00218792	0.100207	6.94631
PATH:00360	Phenylalanine metabolism	PAH	PAH	phenylalanine hydroxylase	0.00218792	0.100207	6.94631
PATH:01212	Fatty acid metabolism	ACACA	ACACA	acetyl-CoA carboxylase alpha	0.00398782	0.152202	3.9073
PATH:01212	Fatty acid metabolism	FASN	FASN	fatty acid synthase	0.00398782	0.152202	3.9073
PATH:01212	Fatty acid metabolism	ACSL5	ACSL5	acyl-CoA synthetase long-chain family member 5	0.00398782	0.152202	3.9073
PATH:01212	Fatty acid metabolism	ACAA1	ACAA1	acetyl-CoA acyltransferase 1	0.00398782	0.152202	3.9073
PATH:01212	Fatty acid metabolism	ELOVL2	ELOVL2	ELOVL fatty acid elongase 2	0.00398782	0.152202	3.9073
PATH:01212	Fatty acid metabolism	ACSL4	ACSL4	acyl-CoA synthetase long-chain family member 4	0.00398782	0.152202	3.9073
PATH:04977	Vitamin digestion and absorption	APOB	APOB	apolipoprotein B	0.00653879	0.179713	5.20973
PATH:04977	Vitamin digestion and absorption	RBP2	RBP2	retinol binding protein 2, cellular	0.00653879	0.179713	5.20973
PATH:04977	Vitamin digestion and absorption	MMACHC	MMACHC	methylmalonic aciduria (cobalamin deficiency) cblC type, with homocystinuria	0.00653879	0.179713	5.20973
PATH:04977	Vitamin digestion and absorption	SLC19A3	SLC19A3	solute carrier family 19 (thiamine transporter), member 3	0.00653879	0.179713	5.20973
PATH:03320	PPAR signaling pathway	DBI	DBI	diazepam binding inhibitor (GABA receptor modulator, acyl-CoA binding protein)	0.00727692	0.179713	3.08181
PATH:03320	PPAR signaling pathway	SORBS1	SORBS1	sorbin and SH3 domain containing 1	0.00727692	0.179713	3.08181
PATH:03320	PPAR signaling pathway	ACSL5	ACSL5	acyl-CoA synthetase long-chain family member 5	0.00727692	0.179713	3.08181
PATH:03320	PPAR signaling pathway	FABP1	FABP1	fatty acid binding protein 1, liver	0.00727692	0.179713	3.08181
PATH:03320	PPAR signaling pathway	ACOX2	ACOX2	acyl-CoA oxidase 2, branched chain	0.00727692	0.179713	3.08181
PATH:03320	PPAR signaling pathway	ACAA1	ACAA1	acetyl-CoA acyltransferase 1	0.00727692	0.179713	3.08181
PATH:03320	PPAR signaling pathway	ACSL4	ACSL4	acyl-CoA synthetase long-chain family member 4	0.00727692	0.179713	3.08181
PATH:00260	Glycine, serine and threonine metabolism	MAOA	MAOA	monoamine oxidase A	0.00758522	0.179713	4.00748
PATH:00260	Glycine, serine and threonine metabolism	SARDH	SARDH	sarcosine dehydrogenase	0.00758522	0.179713	4.00748
PATH:00260	Glycine, serine and threonine metabolism	PSAT1	PSAT1	phosphoserine aminotransferase 1	0.00758522	0.179713	4.00748
PATH:00260	Glycine, serine and threonine metabolism	PIPOX	PIPOX	pipecolic acid oxidase	0.00758522	0.179713	4.00748
PATH:00260	Glycine, serine and threonine metabolism	PSPH	PSPH	phosphoserine phosphatase	0.00758522	0.179713	4.00748
PATH:04918	Thyroid hormone synthesis	ASGR2	ASGR2	asialoglycoprotein receptor 2	0.00784774	0.179713	3.03901
PATH:04918	Thyroid hormone synthesis	ATP1A1	ATP1A1	ATPase, Na+/K+ transporting, alpha 1 polypeptide	0.00784774	0.179713	3.03901
PATH:04918	Thyroid hormone synthesis	ADCY9	ADCY9	adenylate cyclase 9	0.00784774	0.179713	3.03901
PATH:04918	Thyroid hormone synthesis	GPX2	GPX2	glutathione peroxidase 2 (gastrointestinal)	0.00784774	0.179713	3.03901
PATH:04918	Thyroid hormone synthesis	ADCY5	ADCY5	adenylate cyclase 5	0.00784774	0.179713	3.03901
PATH:04918	Thyroid hormone synthesis	CREB5	CREB5	cAMP responsive element binding protein 5	0.00784774	0.179713	3.03901
PATH:04918	Thyroid hormone synthesis	GSR	GSR	glutathione reductase	0.00784774	0.179713	3.03901
PATH:00350	Tyrosine metabolism	ADH6	ADH6	alcohol dehydrogenase 6 (class V)	0.00937765	0.195226	3.812
PATH:00350	Tyrosine metabolism	MAOA	MAOA	monoamine oxidase A	0.00937765	0.195226	3.812
PATH:00350	Tyrosine metabolism	HGD	HGD	homogentisate 1,2-dioxygenase	0.00937765	0.195226	3.812
PATH:00350	Tyrosine metabolism	ALDH3B1	ALDH3B1	aldehyde dehydrogenase 3 family, member B1	0.00937765	0.195226	3.812
PATH:00350	Tyrosine metabolism	DDC	DDC	dopa decarboxylase (aromatic L-amino acid decarboxylase)	0.00937765	0.195226	3.812
PATH:02010	ABC transporters	ABCA4	ABCA4	ATP-binding cassette, sub-family A (ABC1), member 4	0.0125824	0.237637	3.55209
PATH:02010	ABC transporters	ABCB1	ABCB1	ATP-binding cassette, sub-family B (MDR/TAP), member 1	0.0125824	0.237637	3.55209
PATH:02010	ABC transporters	ABCG2	ABCG2	ATP-binding cassette, sub-family G (WHITE), member 2 (Junior blood group)	0.0125824	0.237637	3.55209
PATH:02010	ABC transporters	ABCC2	ABCC2	ATP-binding cassette, sub-family C (CFTR/MRP), member 2	0.0125824	0.237637	3.55209
PATH:02010	ABC transporters	ABCC11	ABCC11	ATP-binding cassette, sub-family C (CFTR/MRP), member 11	0.0125824	0.237637	3.55209
PATH:00061	Fatty acid biosynthesis	ACACA	ACACA	acetyl-CoA carboxylase alpha	0.0140342	0.237637	10.4195
PATH:00061	Fatty acid biosynthesis	FASN	FASN	fatty acid synthase	0.0140342	0.237637	10.4195
PATH:00340	Histidine metabolism	MAOA	MAOA	monoamine oxidase A	0.0145281	0.237637	4.16778
PATH:00340	Histidine metabolism	UROC1	UROC1	urocanate hydratase 1	0.0145281	0.237637	4.16778
PATH:00340	Histidine metabolism	ALDH3B1	ALDH3B1	aldehyde dehydrogenase 3 family, member B1	0.0145281	0.237637	4.16778
PATH:00340	Histidine metabolism	DDC	DDC	dopa decarboxylase (aromatic L-amino acid decarboxylase)	0.0145281	0.237637	4.16778
annotation：	(A)13 genes with blue background： High expressions of these genes were markedly associated with poor outcomes in the LIHC patient cohort. (n(high)=182; n(low)=182). (B) 8 genes with red font: The distribution of RNA expression of these genes were markedly upregulated in TCGA noncancerous samples and LIHC tumour samples (n(T)=369; n(N)=160). (C) 17 genes with purple font: The distribution of RNA e…
